# Supplementary material for: LINC00152 is a lncRNA modulated by microenvironmental stimuli that has pathogenetic and clinical relevance in CLL
Source: Research Square preprint supplement (doi:10.21203/rs.3.rs-8832174/v1), 2026-02-24
Supplement: Supplementary file 1 [file 69c5719f1943bb72db4aa099.pdf]

**Supplementary Digital Content index:**

**Supplementary Figure 1: Page 2**

**Supplementary Figure 2: Page 3**

**Supplementary Figure 3: Page 4**

**Supplementary Figure 4: Page 5**

**Supplementary Figure 5: Page 6**

**Supplementary Figure 6: Page 7**

**Supplementary Figure 7: Page 8**

**Supplementary Figure 8: Page 9**

**Supplementary Figure 9: Page 10**

**Supplementary Figure 10: Page 11**

**Supplementary Figure 11: Page 12**

**Supplementary Figure 12: Page 13**

**Supplementary Table 1: Page 14**

**Supplementary Table 2: Page 15**

**Supplementary Table 3: Page 16**

**Supplementary Table 4: Page 161**

**Supplementary Table 5a: Page 165**

**Supplementary Table 5b: Page 169**

**Supplementary Table 5c: Page 171**

**Supplementary Table 5d: Page 179**

**Supplementary Table 5e: Page 185**

**Supplementary Table 6: Page 196**

**Supplementary Table 7: Page 237**

**Supplementary Table 8: Page 245**

**Supplementary Table 9a: Page 249**

**Supplementary Table 9b: Page 251**

**Supplementary Table 9c: Page 252**

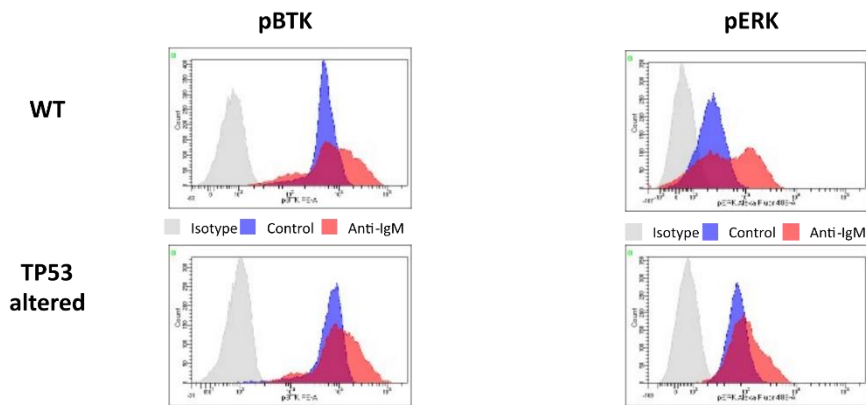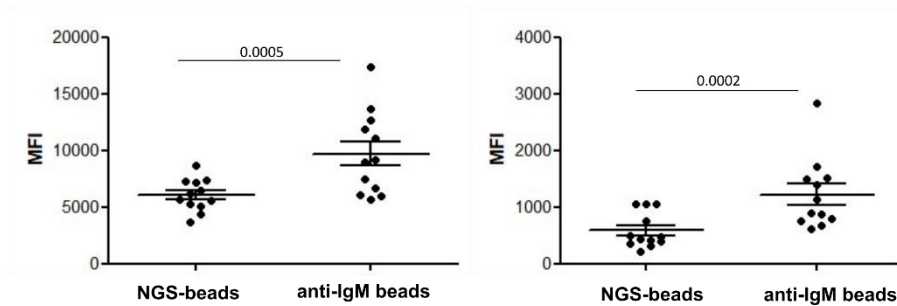

**Supplementary Fig.1. Mean fluorescence intensity (MFI) levels of p-ERK and p-BTK measured by flow cytometry (Phosphoflow assay) in primary CLL samples.** On the top, a prototypic example of stimulation in WT and *TP53* altered cases. Samples were stimulated for 30 min with beads coated with anti-IgM (anti-IgM beads) compared to beads coated with normal goat serum (NGS beads). Data is shown as mean with SEM.

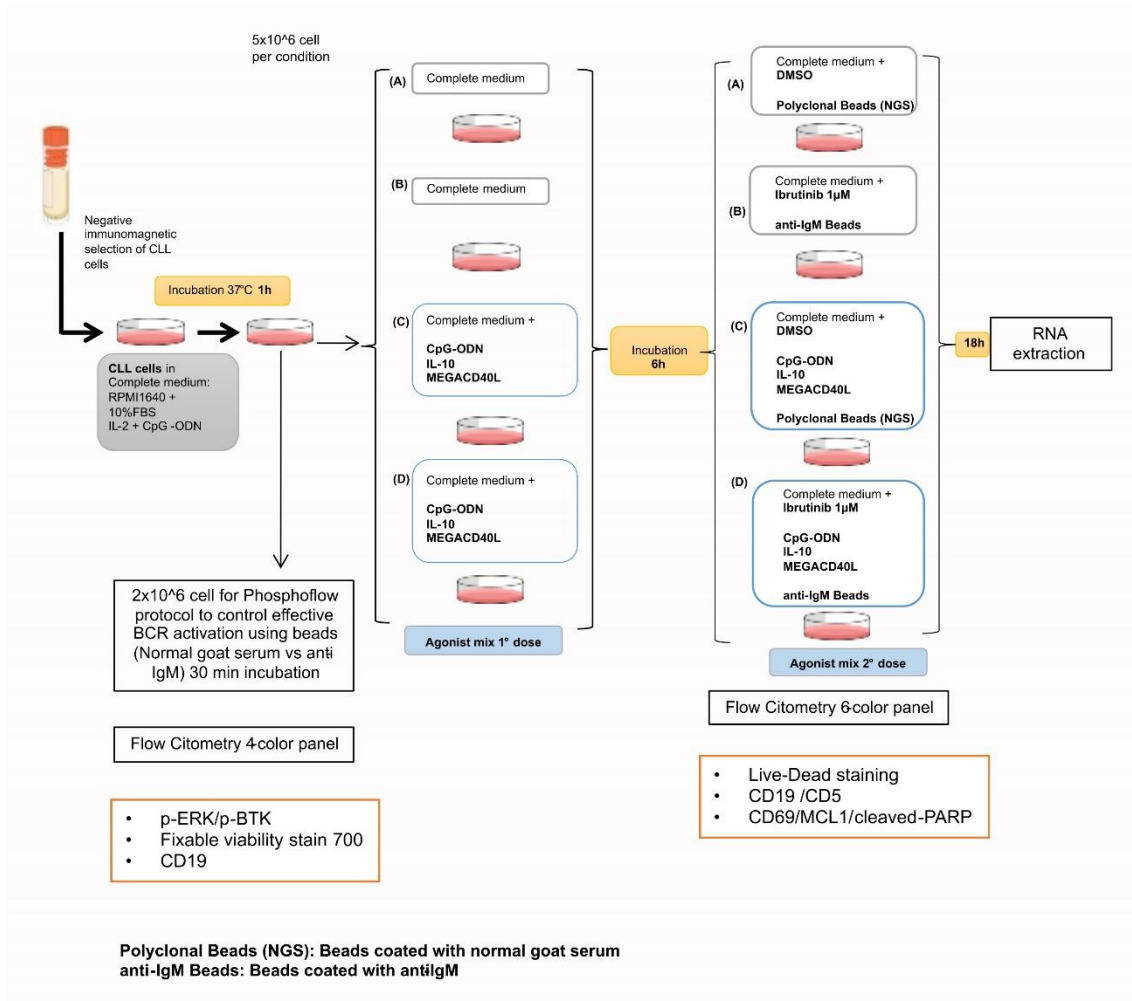

**Supplementary Fig.2. Depiction of the experimental design with all the stimulations for the screening of the transcriptomic differences associated with microenvironment stimuli agonists in presence or not of ibrutinib.**

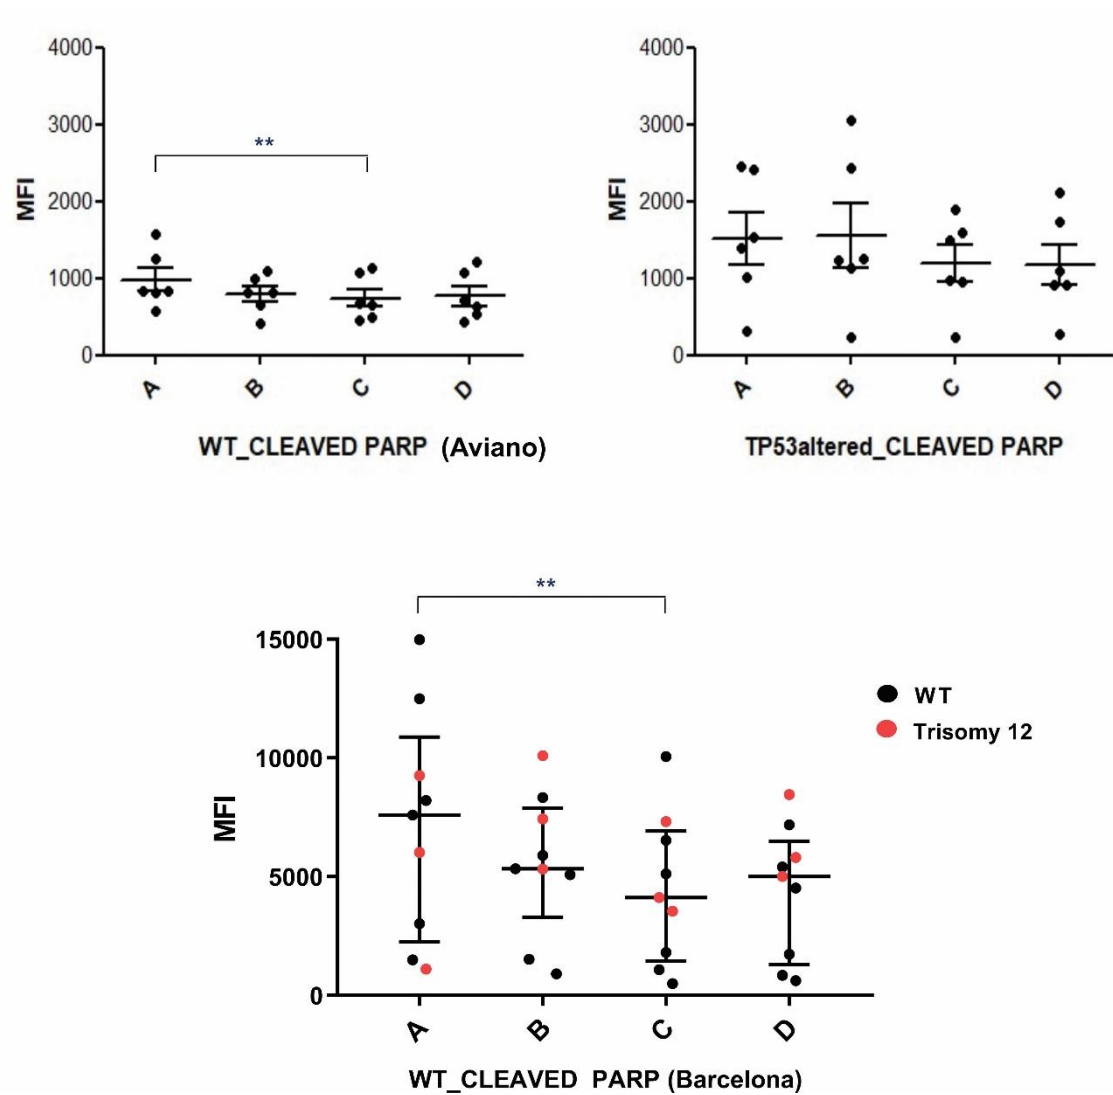

**Supplementary Fig.3. Cell cytometry analysis of cleaved-PARP expression levels.** Apoptosis measurement by Cleaved-PARP MFI in the different studied cohorts across the different conditions of stimulation. A slight reduction was observed in conditions C and D with agonist mix treatment in the presence or absence of Ibrutinib respect to conditions A and B. In Barcelona cohort reported P-values in red refer to Trisomy 12 cases and black ones to WT cases. Data is shown as mean with standard error of the mean (SEM).

**A**

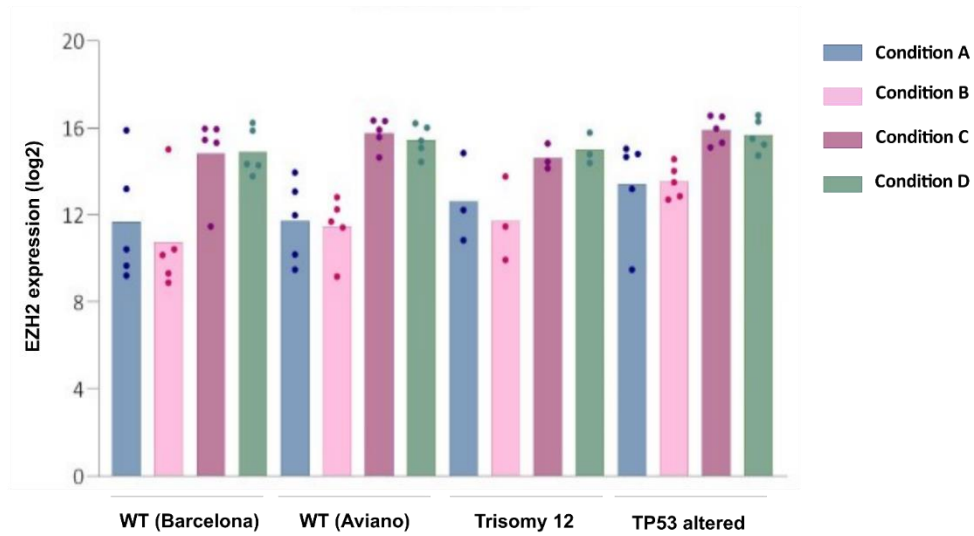

**B**

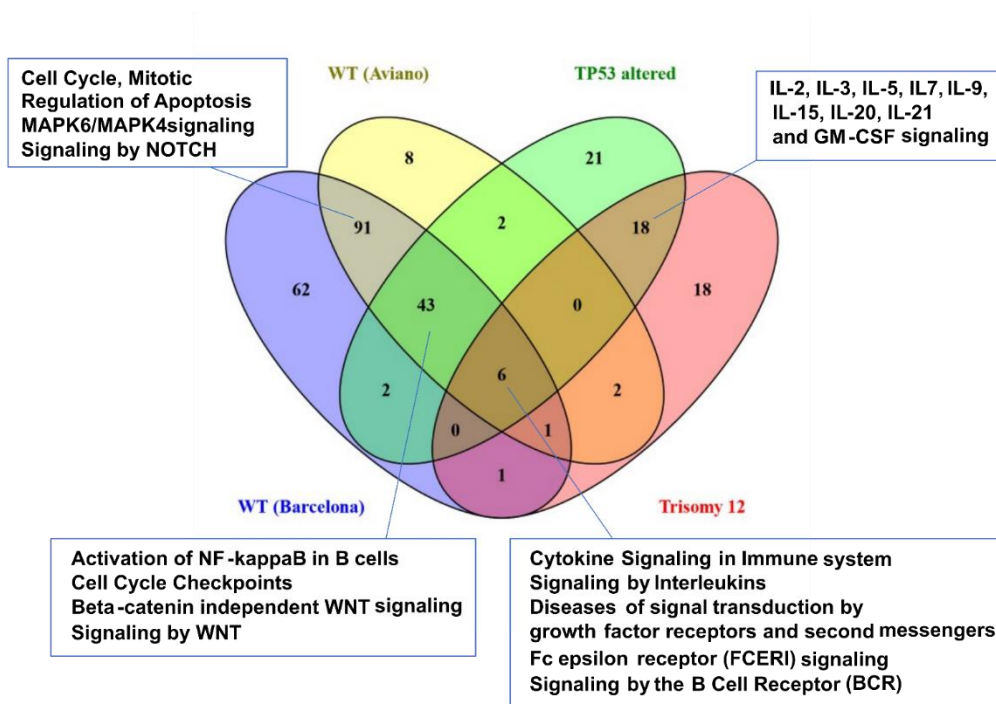

Supplementary Fig.4. **A.** *EZH2* expression values were increased in the stimulation of *ex vivo* CLL samples that included the agonist mix (C and D). **B.** Venn diagram showing numbers of enriched pathways among significantly differentially expressed coding genes modulated by the agonist mix in *ex vivo* experiments (A vs C and B vs D comparisons). Examples of relevant pathogenetic pathways in CLL are showed in boxes.

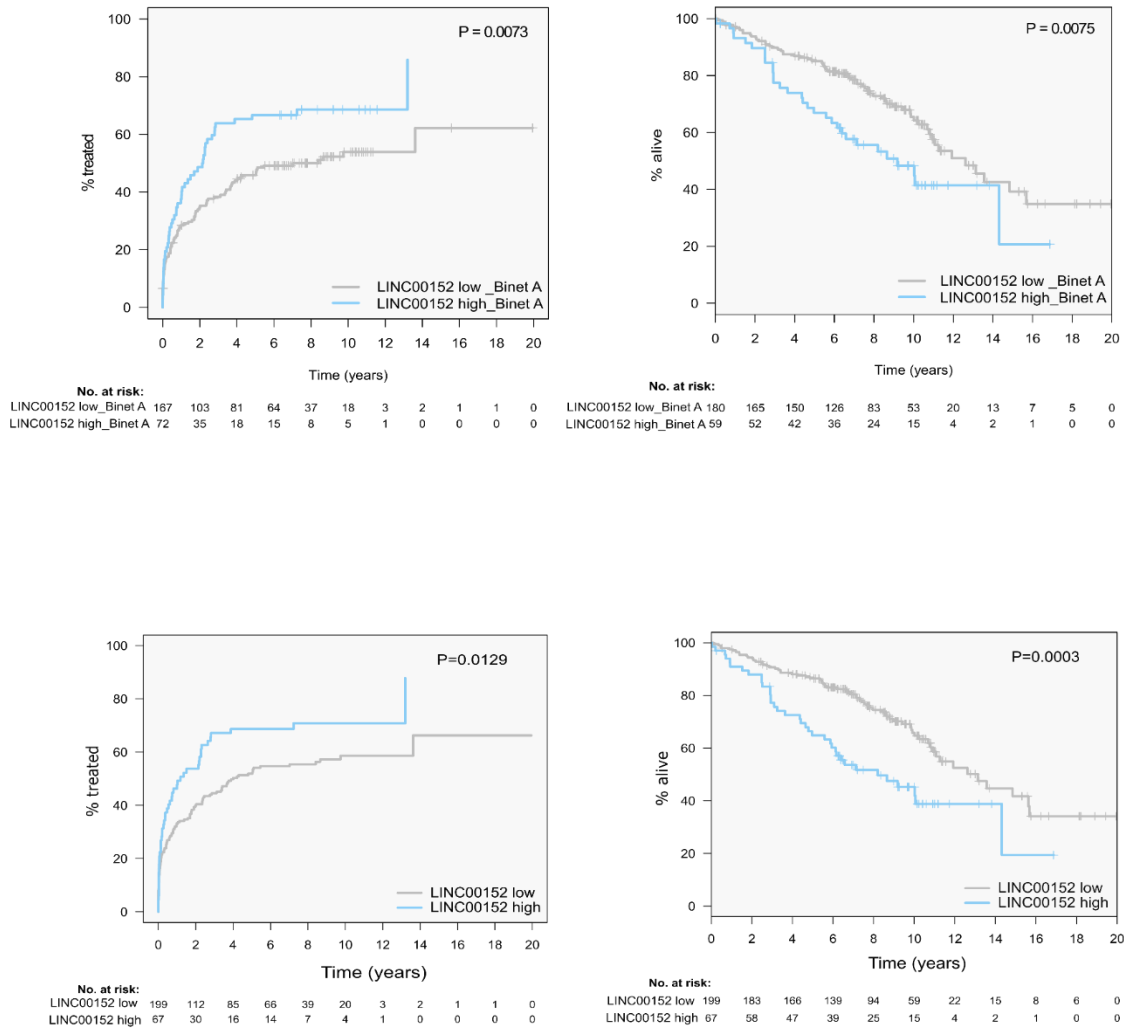

**Supplementary Fig.5. CLL cases with high *LINC00152* expression had a significantly shorter TTT and OS than those with low levels, in Binet A alone (top) as including more advanced stages (bottom).**

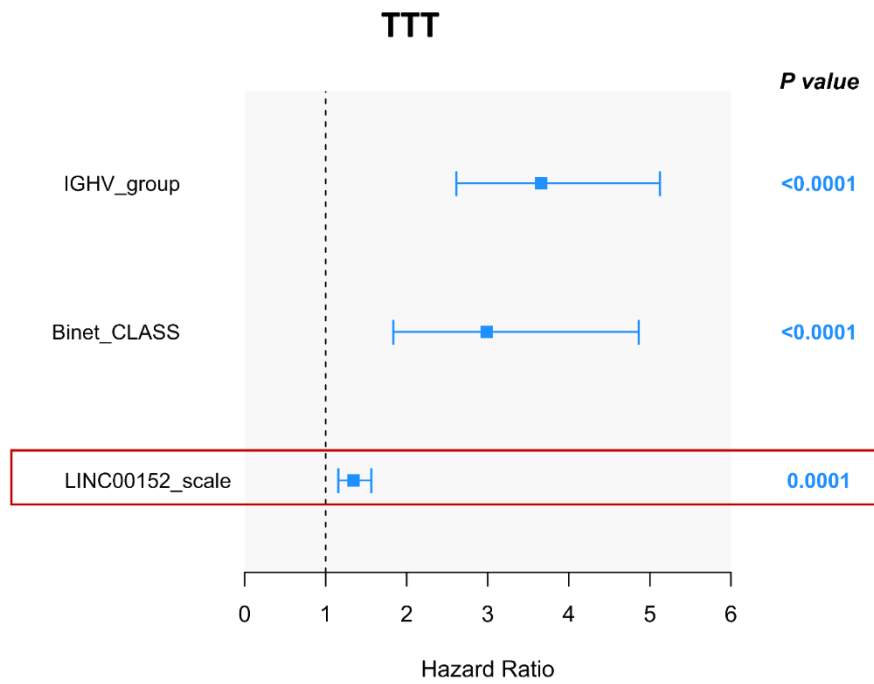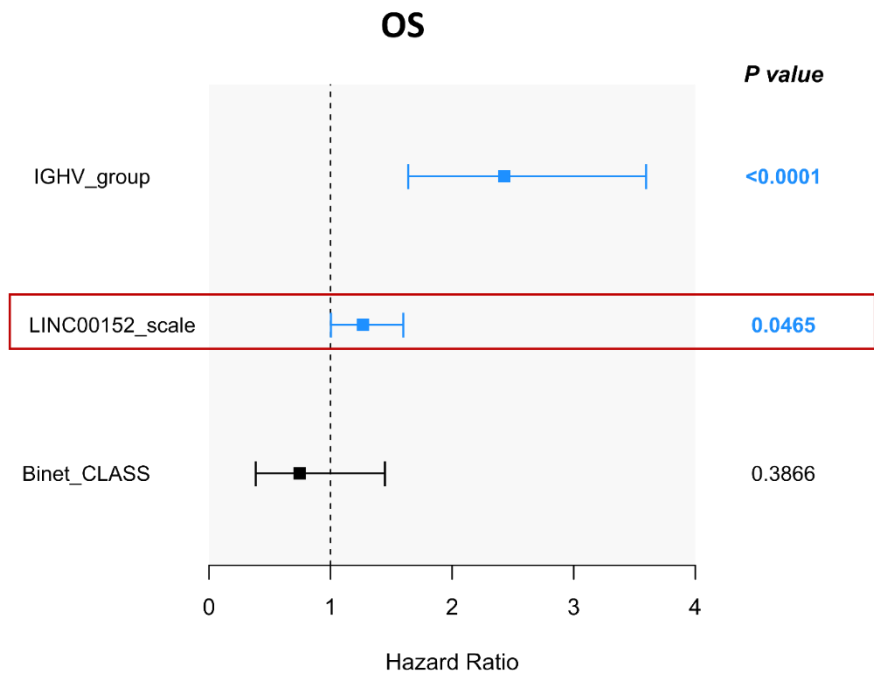

**Supplementary Fig.6. *LINC00152* expression as a continuous variable showed independent clinical value in multivariate analyses with other known prognostic factors as Binet stage and IGHV-mutational status groups (ICGC cohort).**

**A**

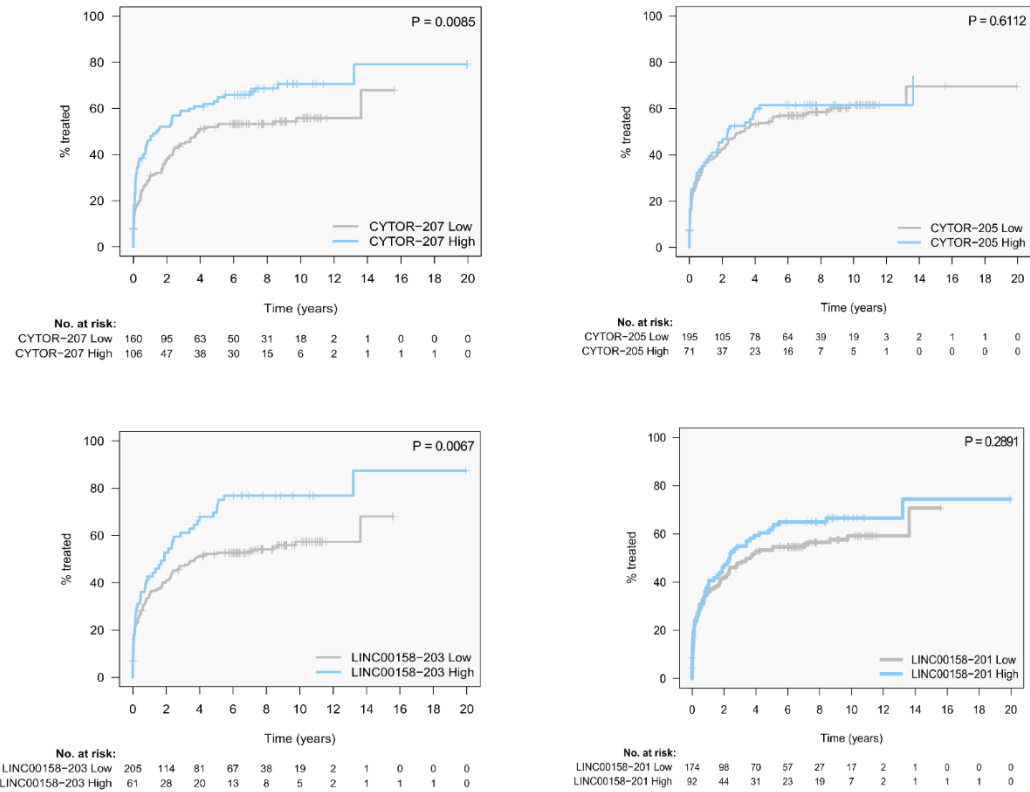

**B**

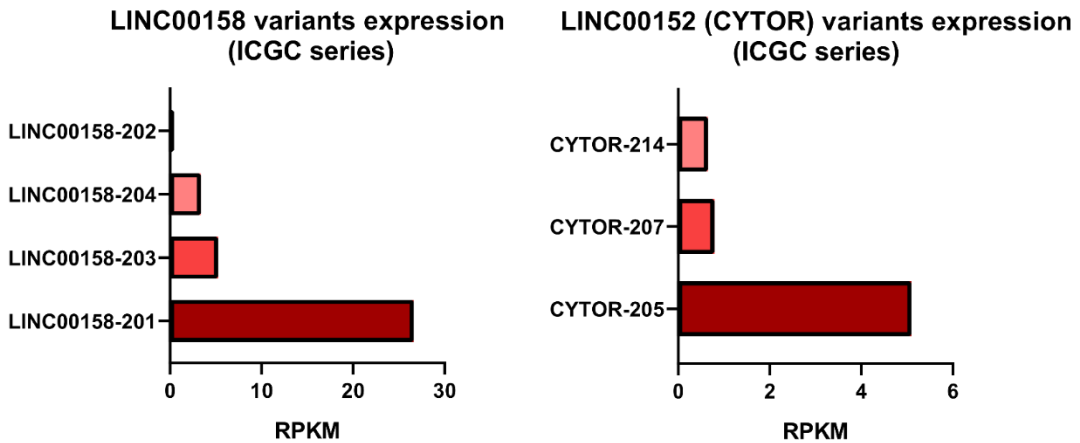

**Supplementary Fig.7. A. Kaplan-Meier curves depicting the shorter TTT associated with high expression of the *LINC00158* transcript variant 203 and *LINC00152* variant 207. These variants showed the most significant clinical impact compared to others from the same lncRNA loci. B. Levels of the transcript variants of *LINC00158* and *LINC00152* in the ICGC series (266 patients).**

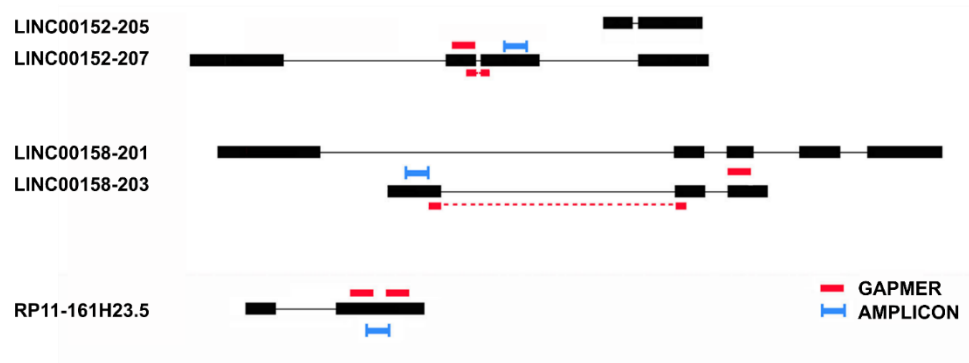

**Supplementary Fig.8. Depiction of the Gapmer location to silence the chosen non-coding candidate transcripts and the amplicons to check the expression downregulation upon silencing in MEC-1 cell line.**

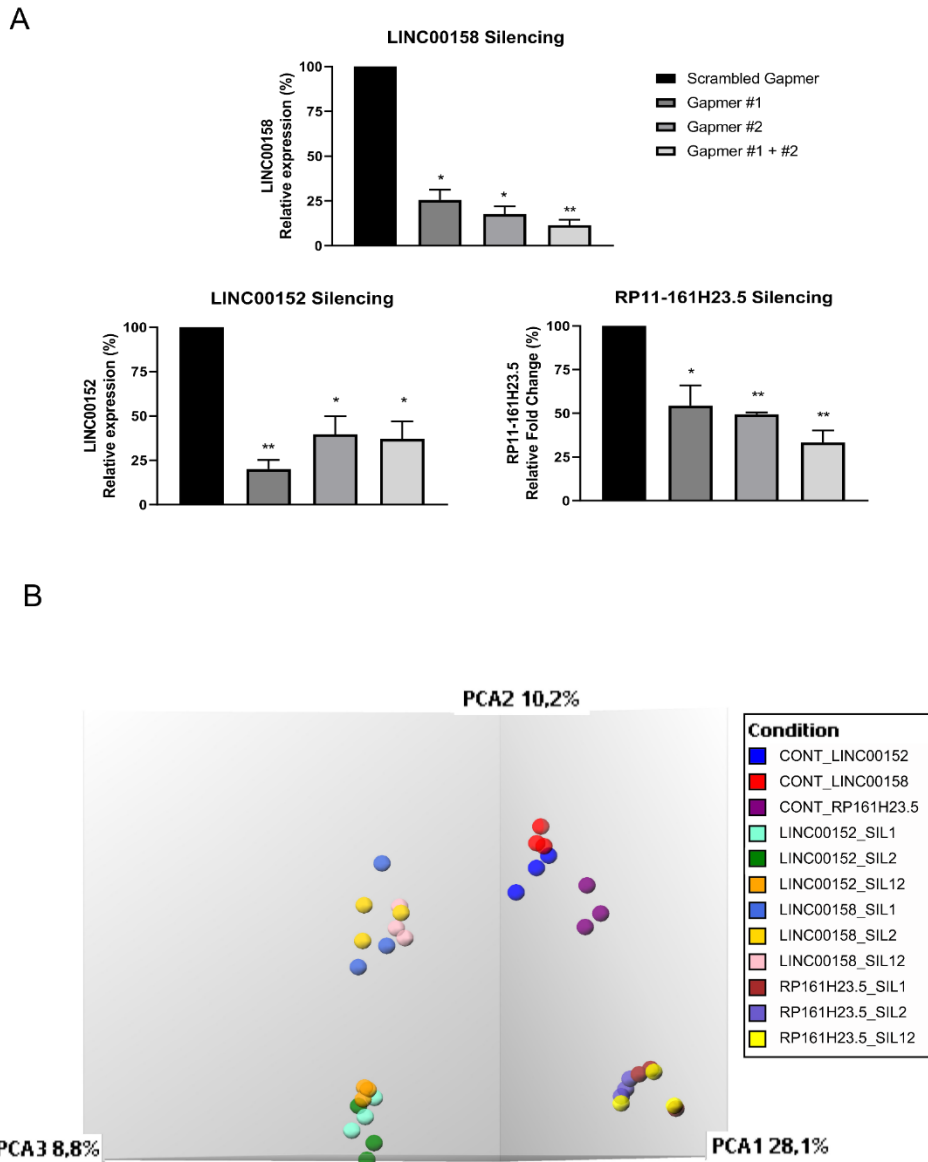

**Supplementary Fig.9. A. Silencing degree achieved in MEC-1 cell line of the three lncRNA candidates.** Relative expression levels of *LINC00158*, *LINC00152*, and *RP11-161H23.5* upon silencing respect to scrambled Gapmer. Data are shown normalized to the median of the corresponding controls and graphics display mean with SEM. **B. Principal Component Analysis (PCA) including all lncRNA/mRNA transcriptomic data showed higher similarity among the negative controls of the different silencing experiments performed for each lncRNA candidate in MEC-1 cell line.** A clear segregation could be observed among the silenced samples by the type of lncRNA assayed by single or combined Gapmer treatments. Abbreviations: CONT: Control treated with Scrambled Gapmer; SIL: Treated with specific Gapmer #1(1), #2(2) or both (12).

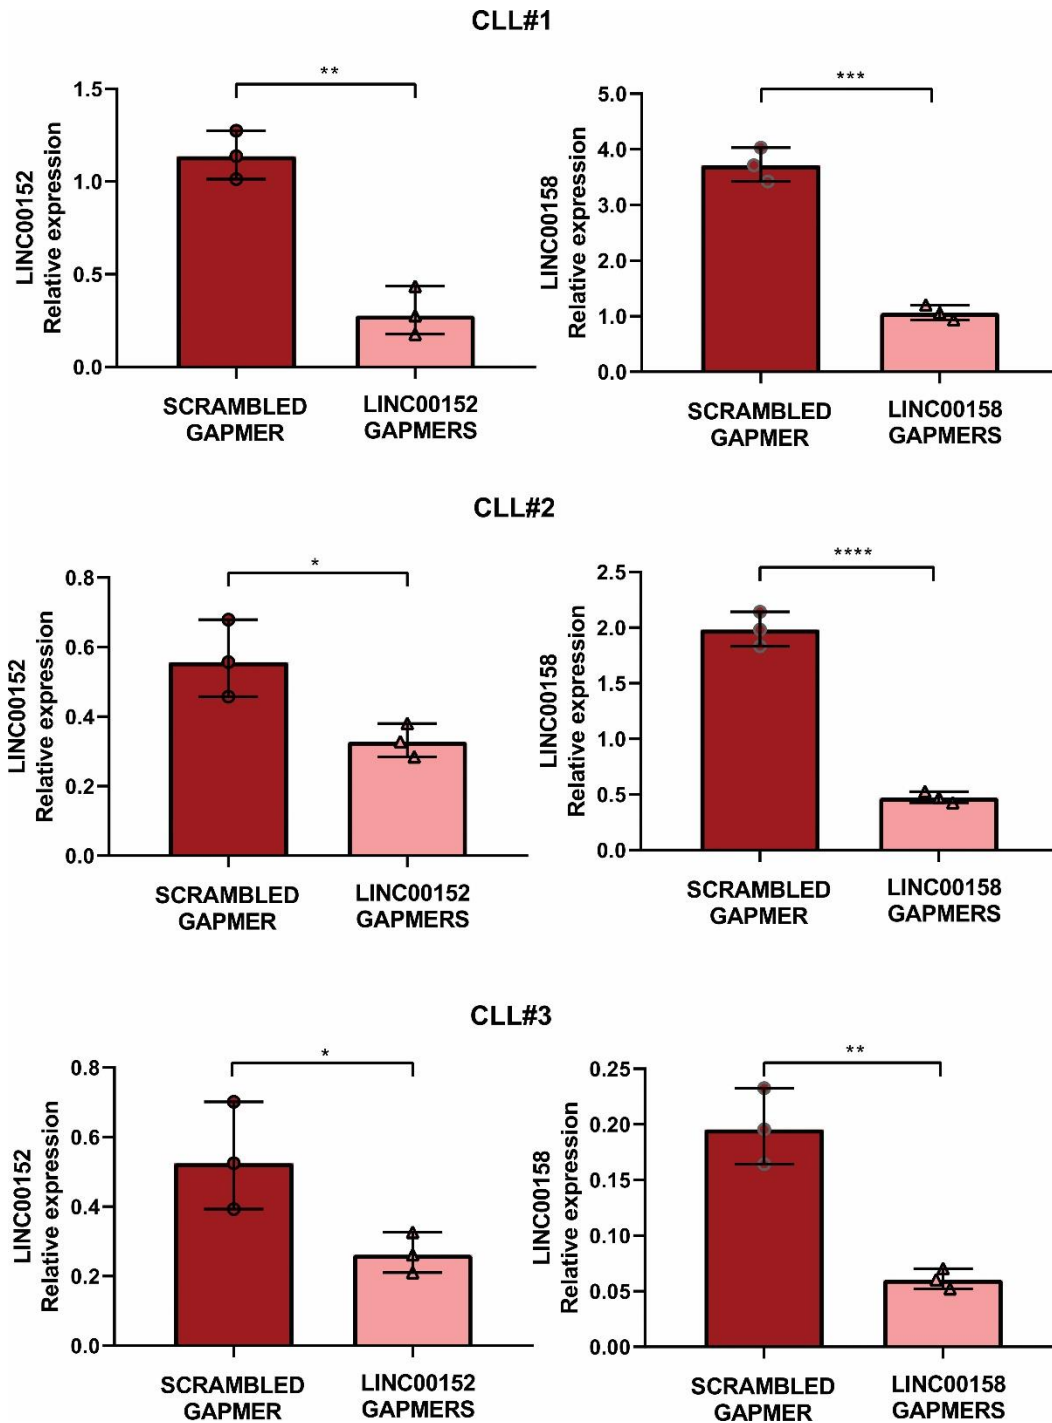

**Supplementary Fig.10. Relative expression levels of *LINC00152* and *LINC00158* in silencing experiments in 3 primary CLL samples compared to treatment with scrambled Gapmer. All samples and conditions were treated with the corresponding Gapmers in presence of Ibrutinib together with agonist factors and for all cases the silencing was effective. Significance level (\*  $p < 0.05$ , \*\*  $p < 0.01$ , \*\*\*  $p = 0.001$ , \*\*\*\*  $p < 0.001$ ).**

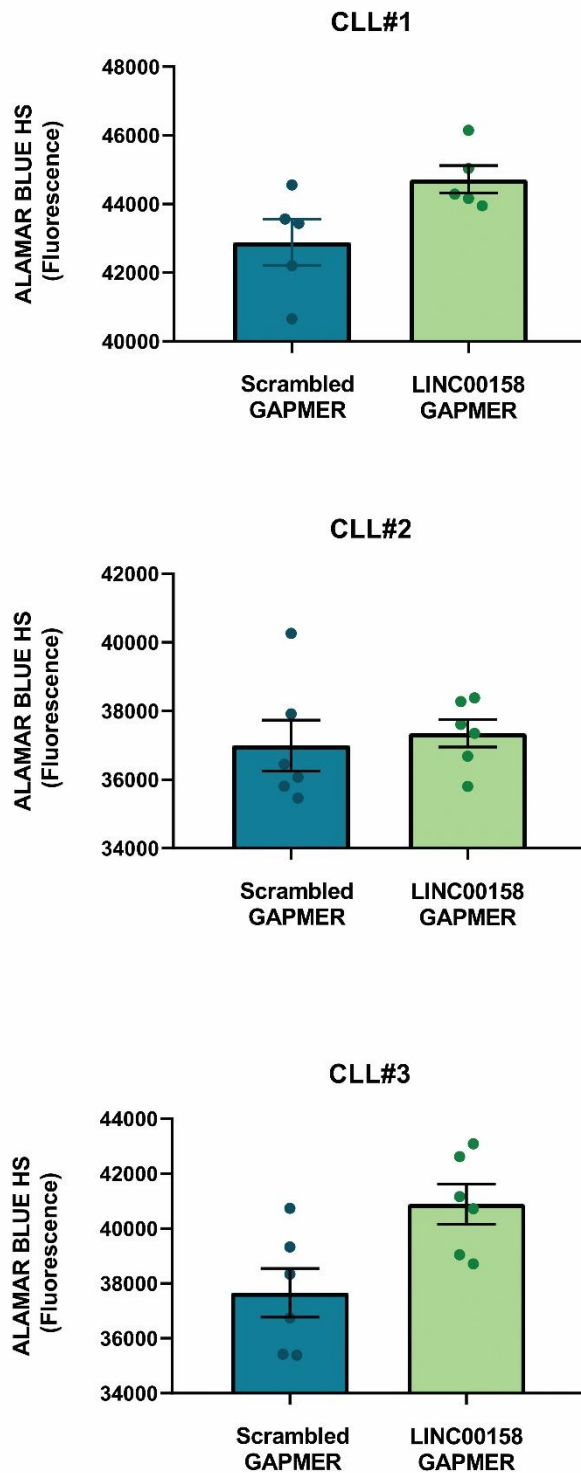

**Supplementary Fig.11. AlamarBlue HS fluorescence quantification showed the absence of significant variations in cell growth upon LINC00158 silencing in primary CLL samples** All samples and conditions were treated with the corresponding Gapmers in presence of Ibrutinib together with agonist factors and for all cases the silencing was effective Significance level (\*  $p < 0.05$ , \*\*  $p < 0.01$ , \*\*\*  $p = 0.001$ ).

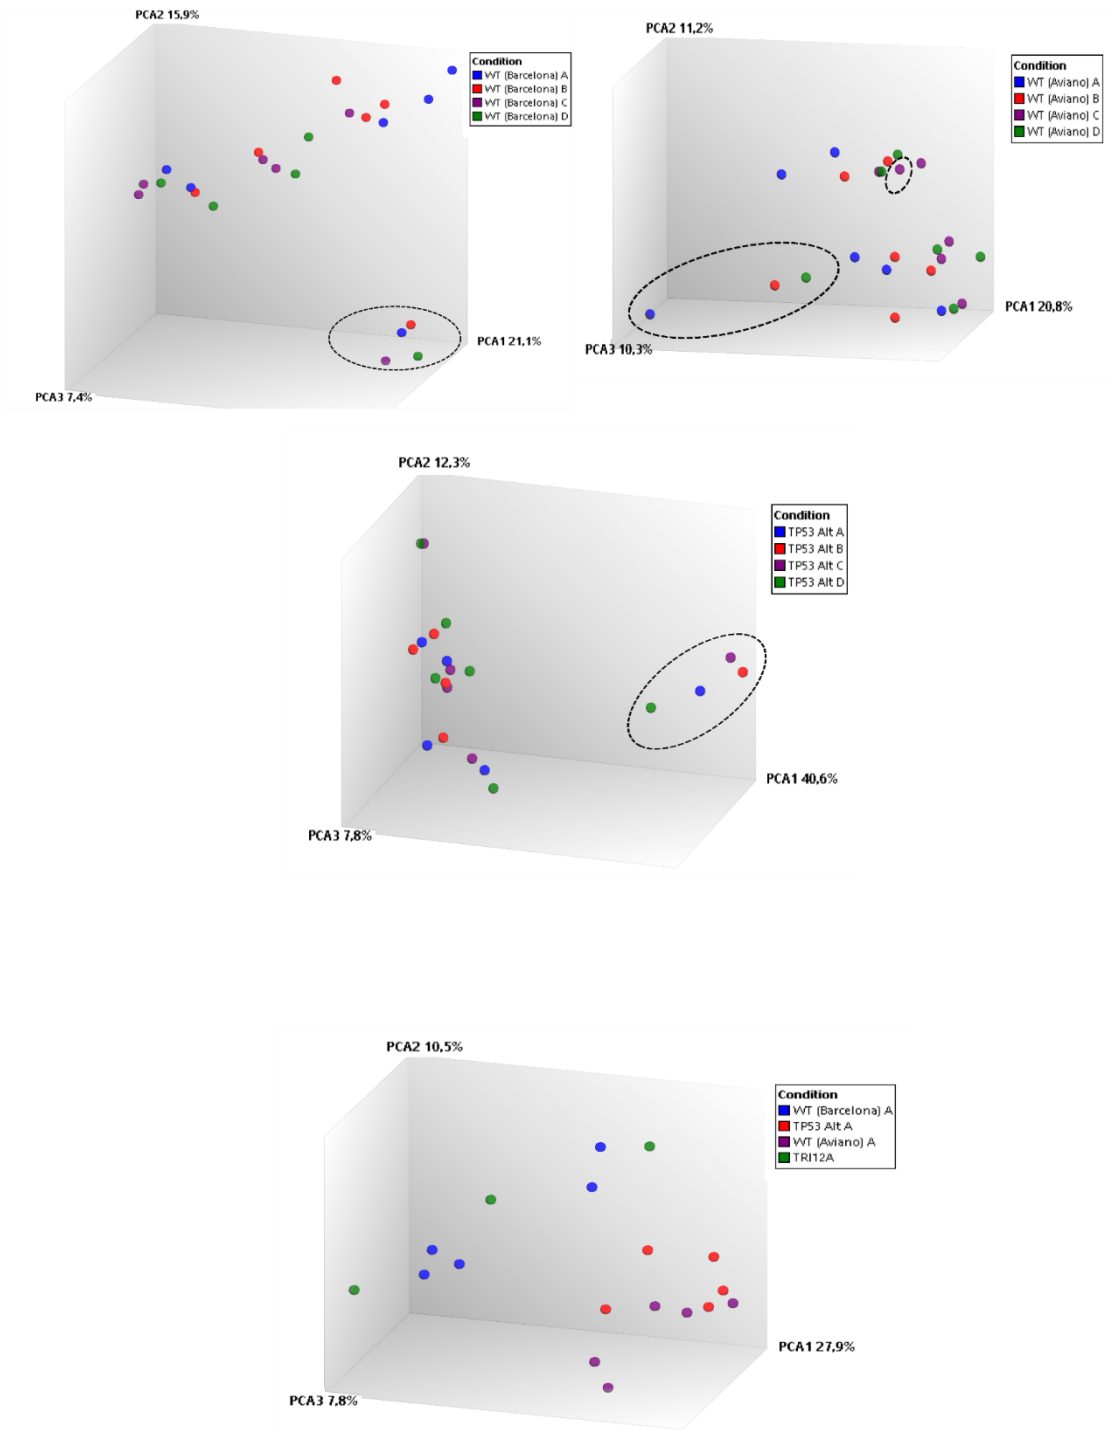

**Supplementary Fig.12. Principal Component Analysis (PCA) including all lncRNA/mRNA transcriptomic data from the 4 experimental conditions (top 3 panels) or only control condition A (to see more clearly differences by cohort). Dashed lines marked the samples identified as outliers.**

**Supplementary Table 1. CLL series analyzed.**

| CASE CODE | SERIES       | ORIGIN    | IGHV status | FISH/SNParray*          | % CD19 | IGHV  | TP53 mutations | Number of driver mutations** | CD49d % | CD38 % | ZAP70 % |
|-----------|--------------|-----------|-------------|-------------------------|--------|-------|----------------|------------------------------|---------|--------|---------|
| WT_BCN1   | WT           | Barcelona | Unmutated   | NORM                    | 91***  | 3-48  | wt             | 0                            | 7       | 70     | 10      |
| WT_BCN2   | WT           | Barcelona | Unmutated   | NORM                    | 90     | 3-33  | wt             | 4                            | n.a.    | 6      | 38      |
| WT_BCN3   | WT           | Barcelona | Unmutated   | NORM                    | 94     | 1-69  | wt             | 4                            | n.a.    | 95     | 20      |
| WT_BCN4   | WT           | Barcelona | Unmutated   | NORM                    | 91     | 1-69  | wt             | 1                            | 5       | 1      | 14      |
| WT_BCN5   | WT †         | Barcelona | Unmutated   | NORM                    | 86     | 2-70  | wt             | 5                            | 100     | 4      | 79      |
| WT_BCN6   | WT           | Barcelona | Unmutated   | NORM                    | n.a.   | 4-39  | wt             | 4                            | n.a.    | 45     | 13      |
| TRI12_1   | Trisomy 12   | Barcelona | Unmutated   | TRIS 12                 | 94     | 1-18  | wt             | 1                            | 73      | 88     | 46      |
| TRI12_2   | Trisomy 12   | Barcelona | Unmutated   | TRIS 12                 | 94     | 1-3   | wt             | 0                            | 100     | 68     | n.a.    |
| TRI12_3   | Trisomy 12   | Barcelona | Unmutated   | TRIS 12                 | 68     | 4-39  | wt             | 4                            | 100     | 98     | 76      |
| WT_AVI1   | WT           | Aviano    | Unmutated   | NORM                    | 95     | 3-11  | wt             | 2                            | 5       | 11     | 49      |
| WT_AVI2   | WT †         | Aviano    | Unmutated   | NORM                    | 97.2   | 3-21  | wt             | 1                            | 2       | 31.2   | 12.2    |
| WT_AVI3   | WT           | Aviano    | Unmutated   | NORM                    | 96.5   | 1-69  | wt             | 1                            | 0       | 11.4   | 25.1    |
| WT_AVI4   | WT           | Aviano    | Unmutated   | DEL13 (95)              | 95.7   | 3-49  | wt             | 3                            | 77.3    | 11.2   | 21.6    |
| WT_AVI5   | WT           | Aviano    | Unmutated   | NORM                    | 97.1   | 1-69  | wt             | 3                            | 2       | 1.7    | 37.2    |
| WT_AVI6   | WT †         | Aviano    | Unmutated   | DEL11 (94)              | 96.7   | 3-21  | wt             | 3                            | 2.8     | 69.6   | 51.9    |
| TP53alt1  | TP53 altered | Aviano    | Unmutated   | DEL17 (95); DEL13 (10)  | 93.9   | 1-69  | 90             | 1                            | 99.9    | 19.9   | 8.7     |
| TP53alt2  | TP53 altered | Aviano    | Unmutated   | DEL17 (68)              | 92.5   | 1-2   | 44.13          | 1                            | 86.1    | 42     | 8.6     |
| TP53alt3  | TP53 altered | Aviano    | Unmutated   | DEL11 (94); DEL17 (5)   | 95.4   | 3-30  | 38.35          | 2                            | 63.2    | 0.5    | 44.9    |
| TP53alt4  | TP53 altered | Aviano    | Unmutated   | TRIS12 (63); DEL13 (80) | 90.6   | 5-51  | 48             | 1                            | 99.9    | 97.8   | n.a.    |
| TP53alt5  | TP53 altered | Aviano    | Unmutated   | DEL11 (36); DEL13 (95)  | 97.7   | 7-4-1 | 25             | 1                            | 64.1    | 54.6   | n.a.    |
| TP53alt6  | TP53 altered | Aviano    | Unmutated   | DEL17 (78)              | 94.8   | 3-73  | 92             | 1                            | 48      | 59.4   | n.a.    |

\* Only considering alterations with potential impact on Ibrutinib response in CLL. \*\* Total number of additional mut in drivers. \*\*\* From the nearest sample analyzed for this patient. † Outlier in the PCA with Clariom D WT pico. n.a. not analyzed.

**Supplementary Table 2. Gapmers, primers and assays used in the functional experiments for lncRNA silencing and monitoring of their expression.**

| Gene                     | Transcripts |                   | Gapmers          |                  | Primers Sybr Green     |                      | Taqman assays       |
|--------------------------|-------------|-------------------|------------------|------------------|------------------------|----------------------|---------------------|
| LncRNA                   | Variant     | ENST code         | Gapmer#1         | Gapmer#2         | Forward primer         | Reverse primer       | Assay code          |
| <b>LINC00158</b>         | 203/201     | ENST00000440205.5 | GGGTATGGCATGAGTT | GACTAGTTAGAGGTT  | CCTGGAAAACCTCCCCAGT    | TGCCTCACGGACTCAAAGAC | Hs00365202_m1 (201) |
| <b>LINC00152 (CYTOR)</b> | 207         | ENST00000414584.1 | GCATGAGTAGAGAAAA | TCACAGAAGAGTCAAG | TGGAGGCTGGAAGTGCAA     | AAGACTGTGCCAGGAGCTG  | Hs03654336_m1       |
| <b>RP11-161H23.5</b>     | unique      | ENST00000550468.2 | GATAGTGCTGACGGAG | CGGGCGCAAATAGAA  | CACAGTGGGAGGCTGGTAAT   | TGCCTGTTATACCGTGGTGA | -                   |
| <b>U6</b>                | -           | ENST00000384534   | -                | -                | GCTTCGGCAGCACATATACTAA | AACGCTTCACGAATTTGCGT | -                   |
| <b>TBP</b>               | 201-3/206   | ENST00000392092   | -                | -                | -                      | -                    | Hs00427620_m1       |
| <b>HPRT1</b>             | 201         | ENST00000298556   | -                | -                | -                      | -                    | Hs02800695_m1       |

**Supplementary Table 3. Differentially expressed coding genes by agonist mix in absence (C vs A) or presence of Ibrutinib (D vs B).**

| <b>TP53altered</b> | <b>Fold Change (CvsA)</b> | <b>P-val (CvsA)</b> | <b>Fold Change (DvsB)</b> | <b>P-val (DvsB)</b> |
|--------------------|---------------------------|---------------------|---------------------------|---------------------|
| AICDA              | 8.59                      | 4.43E-02            | b.t.                      | n.s.                |
| NCF2               | 8.47                      | 9.20E-03            | b.t.                      | n.s.                |
| RFTN1              | 8.45                      | 1.20E-03            | b.t.                      | n.s.                |
| TNFSF4             | 7.49                      | 3.18E-02            | 3.26                      | 4.19E-02            |
| CTH                | 7.47                      | 8.80E-03            | b.t.                      | n.s.                |
| CLIC2              | 6.96                      | 7.00E-03            | 7.86                      | 1.80E-03            |
| ELL2               | 6.32                      | 8.00E-04            | 3.8                       | 5.80E-03            |
| PSMB5              | 6.02                      | 4.21E-02            | b.t.                      | n.s.                |
| TNFRSF9            | 5.81                      | 2.61E-02            | b.t.                      | n.s.                |
| DDIT4              | 5.7                       | 2.63E-02            | b.t.                      | n.s.                |
| GPR132             | 5.37                      | 1.09E-02            | 9.1                       | 1.00E-03            |
| CDKN1A             | 5.19                      | 4.08E-02            | b.t.                      | n.s.                |
| PLGRKT             | 4.73                      | 4.20E-03            | b.t.                      | n.s.                |
| TRAF1              | 4.59                      | 2.24E-02            | 6.84                      | 2.15E-02            |
| TRIP10             | 4.47                      | 9.60E-03            | 4.12                      | 1.02E-02            |
| KCNN4              | 4.4                       | 2.40E-03            | 2.27                      | 4.79E-02            |
| JMY                | 4.29                      | 3.01E-02            | 5.39                      | 2.93E-02            |
| TSPAN33            | 4.23                      | 9.10E-03            | 2.62                      | 4.65E-02            |
| FLVCR2             | 4.19                      | 5.80E-03            | 4.78                      | 3.10E-03            |
| RAB13              | 4.08                      | 2.01E-02            | b.t.                      | n.s.                |
| LTA                | 4.03                      | 1.47E-02            | 3.85                      | 2.61E-02            |
| AIFM2              | 3.97                      | 1.52E-02            | b.t.                      | n.s.                |
| ETV5               | 3.87                      | 3.06E-02            | b.t.                      | n.s.                |
| TFEC               | 3.71                      | 2.72E-02            | b.t.                      | n.s.                |
| TNFAIP3            | 3.49                      | 4.22E-02            | 3.68                      | 6.20E-03            |
| CYB5A              | 3.31                      | 2.20E-03            | b.t.                      | n.s.                |
| SFT2D1             | 3.25                      | 4.89E-02            | b.t.                      | n.s.                |

|         |      |          |      |          |
|---------|------|----------|------|----------|
| NT5DC2  | 3.13 | 2.77E-02 | b.t. | n.s.     |
| ARID3A  | 3.09 | 2.00E-03 | b.t. | n.s.     |
| ARNTL2  | 3.05 | 4.84E-02 | b.t. | n.s.     |
| CENPW   | 3.03 | 3.45E-02 | b.t. | n.s.     |
| CARM1   | 2.96 | 4.10E-02 | b.t. | n.s.     |
| PSMD14  | 2.96 | 3.88E-02 | b.t. | n.s.     |
| SERF1A  | 2.87 | 2.47E-02 | 1.97 | 4.36E-02 |
| RAB9A   | 2.86 | 1.70E-03 | 3.44 | 2.00E-04 |
| ICAM1   | 2.83 | 2.50E-03 | 4.8  | 2.60E-03 |
| PFN1    | 2.82 | 3.47E-02 | b.t. | n.s.     |
| KLHL6   | 2.8  | 9.60E-03 | b.t. | n.s.     |
| HTRA2   | 2.79 | 8.00E-04 | 1.94 | 1.90E-03 |
| TAGLN2  | 2.77 | 3.52E-02 | b.t. | n.s.     |
| GLRX2   | 2.7  | 4.38E-02 | b.t. | n.s.     |
| NFKB2   | 2.68 | 1.40E-02 | 3.77 | 6.70E-03 |
| HUWE1   | 2.67 | 4.25E-02 | b.t. | n.s.     |
| SEC11C  | 2.66 | 9.00E-04 | b.t. | n.s.     |
| TMEM205 | 2.66 | 1.16E-02 | b.t. | n.s.     |
| TMEM63B | 2.66 | 2.59E-02 | 4.49 | 4.12E-02 |
| HELLS   | 2.62 | 2.80E-03 | b.t. | n.s.     |
| RHOF    | 2.62 | 2.60E-03 | 2.42 | 1.53E-02 |
| NIT2    | 2.61 | 4.24E-02 | b.t. | n.s.     |
| COMMD1  | 2.59 | 3.50E-02 | b.t. | n.s.     |
| HYOU1   | 2.58 | 2.24E-02 | b.t. | n.s.     |
| MRPS15  | 2.57 | 4.89E-02 | b.t. | n.s.     |
| RFC2    | 2.55 | 7.50E-03 | b.t. | n.s.     |
| PDGFA   | 2.53 | 4.96E-02 | b.t. | n.s.     |
| REEP4   | 2.48 | 9.90E-03 | b.t. | n.s.     |
| SEC61A2 | 2.47 | 1.02E-02 | 2.34 | 1.11E-02 |

|         |      |          |       |          |
|---------|------|----------|-------|----------|
| MTHFD1  | 2.46 | 1.63E-02 | b.t.  | n.s.     |
| FERMT3  | 2.44 | 1.84E-02 | b.t.  | n.s.     |
| PLAA    | 2.41 | 4.60E-02 | b.t.  | n.s.     |
| ZSWIM4  | 2.41 | 5.70E-03 | b.t.  | n.s.     |
| CYBRD1  | 2.38 | 7.30E-03 | 12.13 | 4.70E-03 |
| COA1    | 2.37 | 3.93E-02 | b.t.  | n.s.     |
| CSF2RB  | 2.37 | 1.47E-02 | b.t.  | n.s.     |
| CALM3   | 2.36 | 2.36E-02 | b.t.  | n.s.     |
| SLCO5A1 | 2.35 | 3.79E-02 | 3.75  | 3.63E-02 |
| STAT3   | 2.33 | 3.73E-02 | b.t.  | n.s.     |
| TNFRSF8 | 2.31 | 1.50E-02 | b.t.  | n.s.     |
| PSMD12  | 2.3  | 4.49E-02 | b.t.  | n.s.     |
| POLA2   | 2.26 | 7.20E-05 | 1.82  | 2.40E-03 |
| LONP1   | 2.25 | 3.17E-02 | b.t.  | n.s.     |
| GTF2H5  | 2.23 | 3.21E-02 | b.t.  | n.s.     |
| OTUD7B  | 2.23 | 1.48E-02 | b.t.  | n.s.     |
| ORC6    | 2.22 | 2.34E-02 | b.t.  | n.s.     |
| VDAC3   | 2.2  | 1.50E-02 | b.t.  | n.s.     |
| EZH2    | 2.19 | 1.99E-02 | 4.41  | 4.08E-02 |
| STAT5B  | 2.16 | 4.70E-03 | b.t.  | n.s.     |
| ACOT13  | 2.15 | 4.99E-02 | b.t.  | n.s.     |
| CCNB1   | 2.14 | 1.71E-02 | b.t.  | n.s.     |
| NDUFAF5 | 2.12 | 3.07E-02 | b.t.  | n.s.     |
| PPP2R5D | 2.1  | 2.55E-02 | b.t.  | n.s.     |
| UBL7    | 2.09 | 2.63E-02 | b.t.  | n.s.     |
| CETN3   | 2.07 | 4.93E-02 | b.t.  | n.s.     |
| PSMC4   | 2.07 | 4.12E-02 | b.t.  | n.s.     |
| MORN2   | 2.06 | 1.54E-02 | b.t.  | n.s.     |
| TBCE    | 2.06 | 1.87E-02 | b.t.  | n.s.     |

|                 |      |          |      |          |
|-----------------|------|----------|------|----------|
| <b>FH</b>       | 2.04 | 4.41E-02 | b.t. | n.s.     |
| <b>NUDT16</b>   | 2.04 | 4.18E-02 | b.t. | n.s.     |
| <b>SPAG1</b>    | 2.04 | 8.20E-03 | b.t. | n.s.     |
| <b>ZDHHC18</b>  | 2.04 | 6.50E-03 | 1.67 | 2.99E-02 |
| <b>COQ3</b>     | 2.03 | 3.54E-02 | b.t. | n.s.     |
| <b>IL21R</b>    | 2.03 | 1.80E-02 | 1.8  | 4.82E-02 |
| <b>UNC119</b>   | 2.03 | 1.92E-02 | b.t. | n.s.     |
| <b>DARS</b>     | 2.02 | 1.84E-02 | b.t. | n.s.     |
| <b>RDX</b>      | 2.01 | 3.09E-02 | b.t. | n.s.     |
| <b>IRF4</b>     | 1.98 | 4.25E-02 | b.t. | n.s.     |
| <b>SPECC1</b>   | 1.97 | 2.54E-02 | b.t. | n.s.     |
| <b>TP53BP2</b>  | 1.96 | 4.00E-02 | b.t. | n.s.     |
| <b>ZNF442</b>   | 1.96 | 1.26E-02 | b.t. | n.s.     |
| <b>FUOM</b>     | 1.95 | 3.20E-03 | b.t. | n.s.     |
| <b>ULBP1</b>    | 1.94 | 1.35E-02 | b.t. | n.s.     |
| <b>C15orf65</b> | 1.94 | 3.60E-02 | b.t. | n.s.     |
| <b>DCLRE1B</b>  | 1.94 | 4.16E-02 | b.t. | n.s.     |
| <b>RFFL</b>     | 1.94 | 1.93E-02 | 1.82 | 2.05E-02 |
| <b>DPCD</b>     | 1.93 | 2.23E-02 | b.t. | n.s.     |
| <b>GRHPR</b>    | 1.93 | 2.94E-02 | 2.5  | 3.04E-02 |
| <b>MRPL52</b>   | 1.93 | 1.30E-02 | b.t. | n.s.     |
| <b>CCDC6</b>    | 1.91 | 1.42E-02 | 2.23 | 2.05E-02 |
| <b>HMGB3</b>    | 1.91 | 3.09E-02 | b.t. | n.s.     |
| <b>PCBD2</b>    | 1.91 | 3.48E-02 | b.t. | n.s.     |
| <b>MCUR1</b>    | 1.9  | 4.81E-02 | b.t. | n.s.     |
| <b>RBBP9</b>    | 1.89 | 9.80E-03 | b.t. | n.s.     |
| <b>STAT5A</b>   | 1.88 | 9.00E-03 | 1.8  | 1.41E-02 |
| <b>ARSB</b>     | 1.87 | 2.88E-02 | b.t. | n.s.     |
| <b>FAM72A</b>   | 1.87 | 4.31E-02 | b.t. | n.s.     |

|         |      |          |      |          |
|---------|------|----------|------|----------|
| IL10RB  | 1.87 | 4.15E-02 | b.t. | n.s.     |
| UQCC3   | 1.85 | 2.75E-02 | b.t. | n.s.     |
| DNAJC18 | 1.81 | 1.37E-02 | b.t. | n.s.     |
| FAM72C  | 1.81 | 3.21E-02 | b.t. | n.s.     |
| MBD2    | 1.81 | 2.20E-03 | b.t. | n.s.     |
| PLD2    | 1.81 | 4.60E-03 | b.t. | n.s.     |
| TNIP2   | 1.81 | 3.93E-02 | b.t. | n.s.     |
| UBQLN2  | 1.79 | 2.03E-02 | b.t. | n.s.     |
| GLDC    | 1.79 | 4.45E-02 | b.t. | n.s.     |
| SLC19A1 | 1.79 | 2.64E-02 | b.t. | n.s.     |
| PCDHB14 | 1.78 | 2.21E-02 | b.t. | n.s.     |
| MRPL19  | 1.78 | 3.38E-02 | b.t. | n.s.     |
| UBE4B   | 1.78 | 3.06E-02 | b.t. | n.s.     |
| GOT2    | 1.77 | 1.01E-02 | 1.83 | 4.78E-02 |
| CBS     | 1.76 | 4.72E-02 | b.t. | n.s.     |
| PPP1R7  | 1.76 | 4.82E-02 | b.t. | n.s.     |
| SUCLG1  | 1.75 | 2.71E-02 | b.t. | n.s.     |
| RTCA    | 1.74 | 2.18E-02 | 1.54 | 2.20E-02 |
| POMT1   | 1.73 | 1.19E-02 | b.t. | n.s.     |
| ARID3B  | 1.72 | 3.41E-02 | b.t. | n.s.     |
| OLA1    | 1.72 | 3.16E-02 | b.t. | n.s.     |
| SMG9    | 1.72 | 8.80E-03 | b.t. | n.s.     |
| TALDO1  | 1.72 | 4.70E-02 | b.t. | n.s.     |
| AP1AR   | 1.71 | 2.27E-02 | b.t. | n.s.     |
| SLC27A4 | 1.71 | 4.86E-02 | b.t. | n.s.     |
| ATOX1   | 1.7  | 2.81E-02 | b.t. | n.s.     |
| PSMC2   | 1.7  | 4.30E-02 | b.t. | n.s.     |
| SKA2    | 1.69 | 4.46E-02 | b.t. | n.s.     |
| SLC12A1 | 1.69 | 1.42E-02 | b.t. | n.s.     |

|                |      |          |      |          |
|----------------|------|----------|------|----------|
| DBI            | 1.68 | 4.53E-02 | b.t. | n.s.     |
| FAM72B         | 1.68 | 1.94E-02 | b.t. | n.s.     |
| PGD            | 1.68 | 4.14E-02 | b.t. | n.s.     |
| BLVRA          | 1.67 | 1.30E-03 | b.t. | n.s.     |
| HPX            | 1.67 | 2.23E-02 | b.t. | n.s.     |
| IFT46          | 1.67 | 2.20E-02 | b.t. | n.s.     |
| SLC26A7        | 1.67 | 4.00E-03 | b.t. | n.s.     |
| TMEM189-UBE2V1 | 1.67 | 3.29E-02 | b.t. | n.s.     |
| AIFM1          | 1.66 | 3.26E-02 | b.t. | n.s.     |
| DTYMK          | 1.66 | 3.37E-02 | b.t. | n.s.     |
| RHEBL1         | 1.66 | 4.76E-02 | b.t. | n.s.     |
| RIBC2          | 1.66 | 1.62E-02 | b.t. | n.s.     |
| TUBE1          | 1.66 | 2.88E-02 | b.t. | n.s.     |
| NABP2          | 1.65 | 3.31E-02 | b.t. | n.s.     |
| SCN8A          | 1.65 | 4.47E-02 | b.t. | n.s.     |
| TFDP2          | 1.65 | 4.86E-02 | 2.08 | 1.28E-02 |
| GPR3           | 1.64 | 8.10E-03 | b.t. | n.s.     |
| IER5           | 1.64 | 4.50E-02 | b.t. | n.s.     |
| PLCB3          | 1.64 | 1.18E-02 | 1.54 | 2.62E-02 |
| CCDC167        | 1.62 | 3.20E-03 | b.t. | n.s.     |
| RCAN2          | 1.62 | 2.25E-02 | b.t. | n.s.     |
| TMEM170B       | 1.62 | 1.44E-02 | b.t. | n.s.     |
| ACOT7          | 1.62 | 2.72E-02 | b.t. | n.s.     |
| DECR2          | 1.62 | 3.38E-02 | b.t. | n.s.     |
| PIGF           | 1.62 | 4.74E-02 | b.t. | n.s.     |
| SLC6A15        | 1.62 | 3.17E-02 | b.t. | n.s.     |
| ERICH4         | 1.61 | 2.88E-02 | b.t. | n.s.     |
| HMBS           | 1.61 | 4.98E-02 | b.t. | n.s.     |
| MAGEC2         | 1.61 | 2.04E-02 | b.t. | n.s.     |

|                 |      |          |      |          |
|-----------------|------|----------|------|----------|
| <b>CHRNA9</b>   | 1.61 | 3.10E-03 | b.t. | n.s.     |
| <b>CLIP2</b>    | 1.61 | 2.84E-02 | b.t. | n.s.     |
| <b>ELK3</b>     | 1.61 | 3.48E-02 | b.t. | n.s.     |
| <b>HSPA4L</b>   | 1.61 | 2.15E-02 | b.t. | n.s.     |
| <b>IPPK</b>     | 1.61 | 3.01E-02 | b.t. | n.s.     |
| <b>PTDSS2</b>   | 1.61 | 2.85E-02 | b.t. | n.s.     |
| <b>KRTAP4-7</b> | 1.6  | 4.00E-04 | b.t. | n.s.     |
| <b>DES</b>      | 1.6  | 9.70E-03 | b.t. | n.s.     |
| <b>ERICH2</b>   | 1.6  | 2.94E-02 | b.t. | n.s.     |
| <b>FBXL2</b>    | 1.6  | 2.13E-02 | b.t. | n.s.     |
| <b>CYP4F8</b>   | 1.59 | 4.00E-04 | b.t. | n.s.     |
| <b>MLST8</b>    | 1.59 | 3.20E-02 | b.t. | n.s.     |
| <b>PIR</b>      | 1.59 | 4.38E-02 | b.t. | n.s.     |
| <b>MTFR1L</b>   | 1.58 | 4.56E-02 | b.t. | n.s.     |
| <b>CCL17</b>    | 1.57 | 4.32E-02 | 1.61 | 2.89E-02 |
| <b>RPS6KA1</b>  | 1.57 | 1.39E-02 | b.t. | n.s.     |
| <b>GPM6B</b>    | 1.56 | 3.15E-02 | b.t. | n.s.     |
| <b>RND3</b>     | 1.56 | 4.94E-02 | b.t. | n.s.     |
| <b>ANKRD7</b>   | 1.55 | 2.67E-02 | b.t. | n.s.     |
| <b>LRRC49</b>   | 1.55 | 2.23E-02 | b.t. | n.s.     |
| <b>EPB41L1</b>  | 1.54 | 1.50E-03 | b.t. | n.s.     |
| <b>RFC3</b>     | 1.54 | 4.71E-02 | b.t. | n.s.     |
| <b>KIAA0319</b> | 1.53 | 9.10E-03 | b.t. | n.s.     |
| <b>ARPC2</b>    | 1.53 | 3.60E-03 | b.t. | n.s.     |
| <b>GMPS</b>     | 1.53 | 4.21E-02 | b.t. | n.s.     |
| <b>IRF5</b>     | 1.53 | 3.41E-02 | b.t. | n.s.     |
| <b>TMEM233</b>  | 1.53 | 4.70E-03 | b.t. | n.s.     |
| <b>ANP32C</b>   | 1.52 | 1.95E-02 | b.t. | n.s.     |
| <b>ECT2</b>     | 1.52 | 3.36E-02 | b.t. | n.s.     |

|                |       |          |       |          |
|----------------|-------|----------|-------|----------|
| <b>GRIN3B</b>  | 1.52  | 3.47E-02 | b.t.  | n.s.     |
| <b>CENPH</b>   | 1.51  | 2.78E-02 | b.t.  | n.s.     |
| <b>CHCHD10</b> | 1.51  | 3.91E-02 | b.t.  | n.s.     |
| <b>MIA2</b>    | 1.51  | 2.21E-02 | b.t.  | n.s.     |
| <b>STK31</b>   | 1.51  | 3.47E-02 | b.t.  | n.s.     |
| <b>THOP1</b>   | 1.51  | 2.14E-02 | b.t.  | n.s.     |
| <b>FAM98B</b>  | 1.5   | 2.91E-02 | b.t.  | n.s.     |
| <b>SAMD1</b>   | 1.5   | 4.67E-02 | b.t.  | n.s.     |
| <b>ARFGAP3</b> | -1.5  | 4.68E-02 | b.t.  | n.s.     |
| <b>NCOA3</b>   | -1.5  | 4.00E-04 | b.t.  | n.s.     |
| <b>ING5</b>    | -1.51 | 3.88E-02 | b.t.  | n.s.     |
| <b>LRIG2</b>   | -1.51 | 1.14E-02 | b.t.  | n.s.     |
| <b>MEX3C</b>   | -1.51 | 4.28E-02 | b.t.  | n.s.     |
| <b>POLR3GL</b> | -1.51 | 4.34E-02 | b.t.  | n.s.     |
| <b>SCML4</b>   | -1.51 | 1.78E-02 | b.t.  | n.s.     |
| <b>SZT2</b>    | -1.51 | 2.48E-02 | b.t.  | n.s.     |
| <b>ZNF490</b>  | -1.51 | 7.30E-03 | -1.68 | 3.16E-02 |
| <b>SH3BGRL</b> | -1.52 | 2.05E-02 | b.t.  | n.s.     |
| <b>TADA2B</b>  | -1.52 | 1.40E-03 | b.t.  | n.s.     |
| <b>VPS8</b>    | -1.52 | 4.91E-02 | b.t.  | n.s.     |
| <b>ZKSCAN8</b> | -1.52 | 3.30E-03 | b.t.  | n.s.     |
| <b>ZNF200</b>  | -1.52 | 1.93E-02 | b.t.  | n.s.     |
| <b>ARL11</b>   | -1.53 | 2.35E-02 | b.t.  | n.s.     |
| <b>MBNL3</b>   | -1.53 | 5.20E-03 | -1.96 | 2.30E-03 |
| <b>UMAD1</b>   | -1.53 | 3.11E-02 | b.t.  | n.s.     |
| <b>PNRC2</b>   | -1.54 | 3.08E-02 | b.t.  | n.s.     |
| <b>SNX16</b>   | -1.54 | 2.48E-02 | b.t.  | n.s.     |
| <b>EPC1</b>    | -1.55 | 7.90E-03 | b.t.  | n.s.     |
| <b>ITGB1</b>   | -1.55 | 9.70E-03 | b.t.  | n.s.     |

|         |       |          |       |          |
|---------|-------|----------|-------|----------|
| GLRA3   | -1.56 | 2.29E-02 | b.t.  | n.s.     |
| ZBBX    | -1.56 | 1.25E-02 | b.t.  | n.s.     |
| ZNF14   | -1.56 | 3.30E-02 | b.t.  | n.s.     |
| PLEKHA3 | -1.57 | 7.90E-03 | b.t.  | n.s.     |
| SMAD4   | -1.57 | 3.20E-02 | b.t.  | n.s.     |
| QRSL1   | -1.58 | 2.32E-02 | b.t.  | n.s.     |
| TMEM219 | -1.58 | 1.64E-02 | b.t.  | n.s.     |
| VCIPI1  | -1.58 | 1.49E-02 | b.t.  | n.s.     |
| DCK     | -1.59 | 3.59E-02 | b.t.  | n.s.     |
| GRAP2   | -1.59 | 2.18E-02 | b.t.  | n.s.     |
| HIST4H4 | -1.59 | 4.03E-02 | b.t.  | n.s.     |
| LHFPL1  | -1.59 | 9.90E-03 | b.t.  | n.s.     |
| NDRG1   | -1.59 | 2.49E-02 | -1.66 | 3.63E-02 |
| SLC35F5 | -1.59 | 2.39E-02 | b.t.  | n.s.     |
| C6orf89 | -1.6  | 2.98E-02 | b.t.  | n.s.     |
| CCDC91  | -1.6  | 3.57E-02 | b.t.  | n.s.     |
| CHD9    | -1.6  | 2.58E-02 | b.t.  | n.s.     |
| NFX1    | -1.6  | 4.72E-02 | -1.64 | 1.36E-02 |
| TMEM243 | -1.6  | 2.83E-02 | b.t.  | n.s.     |
| CD2AP   | -1.61 | 2.20E-02 | b.t.  | n.s.     |
| RC3H2   | -1.61 | 7.60E-03 | b.t.  | n.s.     |
| ZNF394  | -1.61 | 4.30E-02 | b.t.  | n.s.     |
| NOD1    | -1.62 | 2.30E-03 | b.t.  | n.s.     |
| C5orf56 | -1.63 | 2.04E-02 | b.t.  | n.s.     |
| DNAJC16 | -1.63 | 3.54E-02 | b.t.  | n.s.     |
| RASA2   | -1.63 | 3.29E-02 | b.t.  | n.s.     |
| AMFR    | -1.64 | 4.97E-02 | b.t.  | n.s.     |
| ZNF597  | -1.65 | 1.40E-02 | b.t.  | n.s.     |
| AFF4    | -1.65 | 1.90E-02 | b.t.  | n.s.     |

|          |       |          |       |          |
|----------|-------|----------|-------|----------|
| MGME1    | -1.65 | 4.37E-02 | b.t.  | n.s.     |
| PTAR1    | -1.65 | 4.14E-02 | b.t.  | n.s.     |
| RREB1    | -1.65 | 2.12E-02 | b.t.  | n.s.     |
| SIRT1    | -1.65 | 9.10E-03 | b.t.  | n.s.     |
| TBL1X    | -1.65 | 4.34E-02 | b.t.  | n.s.     |
| ELK4     | -1.66 | 1.13E-02 | -1.62 | 2.28E-02 |
| SENP7    | -1.66 | 2.53E-02 | b.t.  | n.s.     |
| ZNF611   | -1.66 | 4.19E-02 | b.t.  | n.s.     |
| C4A      | -1.67 | 3.52E-02 | b.t.  | n.s.     |
| C4B      | -1.67 | 3.52E-02 | b.t.  | n.s.     |
| HERPUD2  | -1.67 | 2.97E-02 | b.t.  | n.s.     |
| CPEB2    | -1.68 | 7.10E-03 | b.t.  | n.s.     |
| MARCH6   | -1.68 | 3.26E-02 | b.t.  | n.s.     |
| GRAPL    | -1.7  | 1.20E-02 | b.t.  | n.s.     |
| ADAM10   | -1.7  | 1.58E-02 | b.t.  | n.s.     |
| L3HYPDH  | -1.7  | 4.84E-02 | b.t.  | n.s.     |
| OSBPL11  | -1.7  | 3.84E-02 | -1.58 | 1.86E-02 |
| USP3     | -1.7  | 2.40E-03 | b.t.  | n.s.     |
| ZNF420   | -1.7  | 1.95E-02 | b.t.  | n.s.     |
| LCORL    | -1.71 | 5.20E-03 | b.t.  | n.s.     |
| METTL21A | -1.71 | 4.90E-03 | b.t.  | n.s.     |
| TMEM127  | -1.73 | 4.53E-02 | b.t.  | n.s.     |
| ABCA7    | -1.73 | 4.44E-02 | b.t.  | n.s.     |
| ANKIB1   | -1.73 | 2.60E-03 | -1.63 | 1.66E-02 |
| IRS1     | -1.73 | 2.80E-03 | -1.82 | 7.70E-03 |
| LIMD1    | -1.73 | 8.00E-03 | b.t.  | n.s.     |
| ZNF79    | -1.73 | 1.60E-03 | b.t.  | n.s.     |
| PCF11    | -1.74 | 3.38E-02 | b.t.  | n.s.     |
| PLEKHG7  | -1.75 | 2.10E-02 | b.t.  | n.s.     |

|          |       |          |       |          |
|----------|-------|----------|-------|----------|
| CASP7    | -1.75 | 4.61E-02 | b.t.  | n.s.     |
| HKR1     | -1.75 | 1.20E-03 | -1.83 | 2.00E-04 |
| P2RY10   | -1.75 | 3.75E-02 | b.t.  | n.s.     |
| RC3H1    | -1.75 | 8.80E-03 | b.t.  | n.s.     |
| USPL1    | -1.75 | 3.20E-03 | b.t.  | n.s.     |
| PIK3AP1  | -1.77 | 4.61E-02 | b.t.  | n.s.     |
| SYNRG    | -1.77 | 4.50E-03 | b.t.  | n.s.     |
| ZNF646   | -1.78 | 1.27E-02 | b.t.  | n.s.     |
| ANKAR    | -1.78 | 2.22E-02 | b.t.  | n.s.     |
| ARL5B    | -1.78 | 4.39E-02 | b.t.  | n.s.     |
| GAB3     | -1.78 | 6.80E-03 | b.t.  | n.s.     |
| TNKS2    | -1.78 | 1.09E-02 | b.t.  | n.s.     |
| KIAA0513 | -1.79 | 1.81E-02 | b.t.  | n.s.     |
| RICTOR   | -1.79 | 6.40E-03 | b.t.  | n.s.     |
| SERGEF   | -1.79 | 2.28E-02 | b.t.  | n.s.     |
| TMEM64   | -1.79 | 4.39E-02 | b.t.  | n.s.     |
| TRIM39   | -1.8  | 4.72E-02 | b.t.  | n.s.     |
| CTDSPL2  | -1.8  | 2.23E-02 | b.t.  | n.s.     |
| ZNF383   | -1.8  | 2.00E-04 | b.t.  | n.s.     |
| FNDC3A   | -1.81 | 1.92E-02 | -1.63 | 3.85E-02 |
| LYSMD3   | -1.82 | 3.01E-02 | b.t.  | n.s.     |
| EFR3A    | -1.84 | 2.99E-02 | b.t.  | n.s.     |
| TGFBR2   | -1.84 | 1.20E-03 | -1.78 | 3.60E-03 |
| APOL3    | -1.85 | 3.62E-02 | b.t.  | n.s.     |
| NFATC3   | -1.85 | 1.67E-02 | -1.96 | 5.00E-04 |
| RNF38    | -1.85 | 2.02E-02 | b.t.  | n.s.     |
| VEZF1    | -1.85 | 2.30E-03 | b.t.  | n.s.     |
| PARP11   | -1.86 | 1.73E-02 | b.t.  | n.s.     |
| TULP4    | -1.86 | 5.10E-03 | b.t.  | n.s.     |

|          |       |          |       |          |
|----------|-------|----------|-------|----------|
| USP28    | -1.86 | 3.00E-04 | b.t.  | n.s.     |
| KIAA1147 | -1.87 | 4.06E-02 | b.t.  | n.s.     |
| PKN2     | -1.87 | 1.08E-02 | b.t.  | n.s.     |
| TESK2    | -1.87 | 4.12E-02 | -3.23 | 9.90E-03 |
| ZNF429   | -1.87 | 7.20E-03 | b.t.  | n.s.     |
| AKAP11   | -1.88 | 4.90E-03 | b.t.  | n.s.     |
| CXXC5    | -1.88 | 4.26E-02 | b.t.  | n.s.     |
| GCNT2    | -1.88 | 4.44E-02 | -2.07 | 3.80E-02 |
| MORC3    | -1.88 | 2.49E-02 | b.t.  | n.s.     |
| MGAT5    | -1.89 | 6.00E-03 | b.t.  | n.s.     |
| SIK3     | -1.89 | 4.84E-02 | b.t.  | n.s.     |
| TRIM23   | -1.9  | 2.70E-03 | b.t.  | n.s.     |
| TTBK2    | -1.9  | 1.83E-02 | b.t.  | n.s.     |
| USP33    | -1.9  | 2.08E-02 | b.t.  | n.s.     |
| RNF168   | -1.91 | 4.71E-02 | b.t.  | n.s.     |
| ZNF439   | -1.91 | 2.66E-02 | b.t.  | n.s.     |
| ARHGEF3  | -1.92 | 2.61E-02 | b.t.  | n.s.     |
| C2CD5    | -1.92 | 2.56E-02 | b.t.  | n.s.     |
| CREB1    | -1.92 | 4.30E-02 | b.t.  | n.s.     |
| KLF11    | -1.92 | 3.10E-02 | b.t.  | n.s.     |
| PHF19    | -1.92 | 1.85E-02 | b.t.  | n.s.     |
| VPS13C   | -1.92 | 4.01E-02 | b.t.  | n.s.     |
| RNF111   | -1.93 | 4.40E-02 | b.t.  | n.s.     |
| UGT8     | -1.93 | 1.08E-02 | b.t.  | n.s.     |
| ZNF83    | -1.93 | 6.70E-03 | b.t.  | n.s.     |
| FBXL4    | -1.94 | 4.18E-02 | b.t.  | n.s.     |
| TGFBI    | -1.94 | 1.02E-02 | b.t.  | n.s.     |
| TEC      | -1.96 | 2.00E-03 | -1.84 | 9.80E-03 |
| ZNF184   | -1.96 | 4.55E-02 | -1.86 | 8.40E-03 |

|          |       |          |       |          |
|----------|-------|----------|-------|----------|
| ZNF852   | -1.96 | 2.41E-02 | -1.57 | 1.52E-02 |
| SLC25A26 | -1.97 | 5.00E-04 | b.t.  | n.s.     |
| CASP8    | -1.97 | 2.23E-02 | b.t.  | n.s.     |
| FAM3C    | -1.97 | 6.80E-03 | b.t.  | n.s.     |
| ZNF860   | -1.98 | 2.80E-03 | b.t.  | n.s.     |
| ATXN7    | -1.99 | 7.90E-03 | b.t.  | n.s.     |
| C2CD2    | -2    | 9.40E-03 | b.t.  | n.s.     |
| CUBN     | -2    | 1.56E-02 | b.t.  | n.s.     |
| KLHL28   | -2    | 4.10E-03 | b.t.  | n.s.     |
| SFXN3    | -2    | 8.90E-03 | -2.36 | 2.00E-04 |
| CDCA7L   | -2.01 | 2.62E-02 | b.t.  | n.s.     |
| PRKD3    | -2.01 | 1.50E-02 | -1.5  | 3.00E-02 |
| ACSS1    | -2.02 | 2.64E-02 | -1.51 | 3.30E-02 |
| CTSS     | -2.02 | 2.78E-02 | -1.54 | 2.64E-02 |
| EAF2     | -2.02 | 2.62E-02 | b.t.  | n.s.     |
| RPRD2    | -2.02 | 2.60E-02 | -1.56 | 1.22E-02 |
| SIDT1    | -2.02 | 1.90E-03 | b.t.  | n.s.     |
| RSBN1L   | -2.04 | 1.46E-02 | -1.88 | 6.00E-03 |
| SRGAP2B  | -2.04 | 2.89E-02 | b.t.  | n.s.     |
| ANK1     | -2.05 | 4.84E-02 | b.t.  | n.s.     |
| BACH2    | -2.05 | 8.30E-03 | b.t.  | n.s.     |
| FAM122C  | -2.05 | 3.66E-02 | b.t.  | n.s.     |
| IL1RAP   | -2.05 | 3.60E-03 | b.t.  | n.s.     |
| KBTBD8   | -2.05 | 3.40E-02 | -2.23 | 6.80E-03 |
| MAPRE2   | -2.05 | 3.91E-02 | -2.26 | 1.06E-02 |
| PARVG    | -2.06 | 2.25E-02 | -1.98 | 3.40E-02 |
| RPS6KC1  | -2.06 | 2.80E-03 | b.t.  | n.s.     |
| MGAT1    | -2.08 | 4.90E-03 | -2.58 | 6.99E-05 |
| RAB31    | -2.08 | 3.36E-02 | -2.17 | 2.24E-02 |

|                 |       |          |       |          |
|-----------------|-------|----------|-------|----------|
| <b>SNX30</b>    | -2.08 | 5.20E-03 | -3.19 | 3.45E-05 |
| <b>MILR1</b>    | -2.09 | 4.30E-03 | b.t.  | n.s.     |
| <b>SETX</b>     | -2.09 | 3.58E-02 | -1.85 | 8.60E-03 |
| <b>SHISA5</b>   | -2.09 | 1.30E-03 | -1.91 | 4.00E-03 |
| <b>SRSF5</b>    | -2.09 | 4.42E-02 | b.t.  | n.s.     |
| <b>STK17B</b>   | -2.09 | 1.93E-02 | -1.61 | 4.17E-02 |
| <b>FGD2</b>     | -2.11 | 4.63E-02 | b.t.  | n.s.     |
| <b>RASA3</b>    | -2.12 | 4.82E-02 | -1.77 | 4.13E-02 |
| <b>SLC25A2</b>  | -2.12 | 4.93E-02 | b.t.  | n.s.     |
| <b>KANSL1</b>   | -2.12 | 7.40E-03 | b.t.  | n.s.     |
| <b>KMO</b>      | -2.12 | 5.50E-03 | b.t.  | n.s.     |
| <b>YPEL2</b>    | -2.13 | 3.57E-02 | b.t.  | n.s.     |
| <b>CLEC17A</b>  | -2.14 | 6.30E-03 | b.t.  | n.s.     |
| <b>HEATR6</b>   | -2.14 | 4.00E-03 | b.t.  | n.s.     |
| <b>ANTXR2</b>   | -2.15 | 4.48E-02 | -2.34 | 2.66E-02 |
| <b>SLC35E2B</b> | -2.16 | 2.82E-02 | b.t.  | n.s.     |
| <b>SGK3</b>     | -2.21 | 1.50E-03 | -1.71 | 3.47E-02 |
| <b>ZNF92</b>    | -2.21 | 5.00E-03 | b.t.  | n.s.     |
| <b>MR1</b>      | -2.22 | 2.11E-02 | b.t.  | n.s.     |
| <b>EGR1</b>     | -2.23 | 1.78E-02 | b.t.  | n.s.     |
| <b>HIPK3</b>    | -2.23 | 2.71E-02 | -2.11 | 4.20E-03 |
| <b>PYHIN1</b>   | -2.24 | 4.98E-02 | b.t.  | n.s.     |
| <b>SAMHD1</b>   | -2.24 | 3.68E-02 | -2.91 | 4.36E-02 |
| <b>KAT2B</b>    | -2.25 | 3.20E-03 | -1.95 | 3.39E-02 |
| <b>RIPK1</b>    | -2.25 | 3.70E-03 | b.t.  | n.s.     |
| <b>CDKL1</b>    | -2.26 | 1.03E-02 | -1.73 | 4.84E-02 |
| <b>MX11</b>     | -2.26 | 1.14E-02 | b.t.  | n.s.     |
| <b>ZNF800</b>   | -2.27 | 2.06E-02 | b.t.  | n.s.     |
| <b>KAT6B</b>    | -2.28 | 5.00E-04 | -1.99 | 4.58E-02 |

|                 |       |          |       |          |
|-----------------|-------|----------|-------|----------|
| <b>KHDRBS2</b>  | -2.28 | 1.51E-02 | b.t.  | n.s.     |
| <b>MARCH8</b>   | -2.28 | 1.01E-02 | -1.92 | 1.13E-02 |
| <b>NSUN6</b>    | -2.29 | 6.90E-03 | b.t.  | n.s.     |
| <b>ZNF763</b>   | -2.3  | 3.24E-02 | b.t.  | n.s.     |
| <b>CLEC2D</b>   | -2.3  | 1.33E-02 | -1.88 | 4.32E-02 |
| <b>FAM13B</b>   | -2.32 | 8.30E-03 | b.t.  | n.s.     |
| <b>KANSL1L</b>  | -2.32 | 2.53E-02 | b.t.  | n.s.     |
| <b>SLFN5</b>    | -2.32 | 2.85E-02 | b.t.  | n.s.     |
| <b>GAB1</b>     | -2.33 | 2.40E-03 | b.t.  | n.s.     |
| <b>KIAA0040</b> | -2.33 | 9.60E-03 | -2.63 | 4.29E-02 |
| <b>PARP8</b>    | -2.33 | 9.50E-03 | -2.14 | 4.73E-02 |
| <b>ZMYM1</b>    | -2.35 | 2.16E-02 | b.t.  | n.s.     |
| <b>ELF1</b>     | -2.36 | 3.00E-04 | -1.93 | 3.10E-03 |
| <b>LPAR5</b>    | -2.36 | 2.59E-02 | -2.06 | 2.79E-02 |
| <b>B3GALT4</b>  | -2.38 | 2.99E-02 | b.t.  | n.s.     |
| <b>C16orf74</b> | -2.38 | 6.40E-03 | b.t.  | n.s.     |
| <b>AFTPH</b>    | -2.39 | 9.50E-03 | -1.56 | 2.26E-02 |
| <b>NUB1</b>     | -2.39 | 1.51E-02 | b.t.  | n.s.     |
| <b>OXR1</b>     | -2.39 | 1.00E-04 | b.t.  | n.s.     |
| <b>STX7</b>     | -2.4  | 1.02E-02 | b.t.  | n.s.     |
| <b>GTPBP1</b>   | -2.41 | 1.76E-02 | b.t.  | n.s.     |
| <b>DMXL1</b>    | -2.42 | 1.20E-03 | b.t.  | n.s.     |
| <b>KCNJ11</b>   | -2.42 | 1.82E-02 | b.t.  | n.s.     |
| <b>PDP1</b>     | -2.42 | 2.43E-02 | -3.05 | 3.20E-02 |
| <b>STAT2</b>    | -2.42 | 2.70E-03 | -3.48 | 1.58E-02 |
| <b>ZSWIM6</b>   | -2.42 | 7.00E-04 | b.t.  | n.s.     |
| <b>FMR1</b>     | -2.43 | 1.26E-02 | b.t.  | n.s.     |
| <b>PCMTD1</b>   | -2.46 | 3.50E-03 | b.t.  | n.s.     |
| <b>ADD3</b>     | -2.48 | 4.38E-02 | -2.88 | 2.94E-02 |

|                |       |          |       |          |
|----------------|-------|----------|-------|----------|
| <b>TRIM38</b>  | -2.49 | 9.00E-04 | -2.38 | 6.40E-03 |
| <b>CDK14</b>   | -2.51 | 1.27E-02 | -2.8  | 4.52E-02 |
| <b>TCF4</b>    | -2.53 | 1.04E-02 | -1.86 | 2.14E-02 |
| <b>SGPP1</b>   | -2.55 | 1.70E-03 | b.t.  | n.s.     |
| <b>SPIN4</b>   | -2.55 | 7.00E-04 | b.t.  | n.s.     |
| <b>HBP1</b>    | -2.55 | 3.02E-02 | b.t.  | n.s.     |
| <b>IL10RA</b>  | -2.55 | 2.15E-02 | b.t.  | n.s.     |
| <b>MBP</b>     | -2.55 | 3.61E-02 | -3.45 | 8.10E-03 |
| <b>NFATC1</b>  | -2.55 | 3.00E-04 | -2.08 | 1.50E-03 |
| <b>SOS1</b>    | -2.55 | 7.70E-03 | b.t.  | n.s.     |
| <b>PARP3</b>   | -2.56 | 1.50E-03 | b.t.  | n.s.     |
| <b>SLC15A2</b> | -2.56 | 4.00E-04 | b.t.  | n.s.     |
| <b>SYK</b>     | -2.57 | 2.22E-02 | b.t.  | n.s.     |
| <b>OSBPL10</b> | -2.59 | 9.40E-03 | b.t.  | n.s.     |
| <b>TBCC</b>    | -2.61 | 2.58E-02 | b.t.  | n.s.     |
| <b>GPR155</b>  | -2.61 | 4.57E-02 | b.t.  | n.s.     |
| <b>SESN1</b>   | -2.74 | 1.25E-02 | b.t.  | n.s.     |
| <b>SETBP1</b>  | -2.77 | 1.11E-02 | -3.72 | 2.40E-03 |
| <b>DCLRE1C</b> | -2.78 | 1.00E-04 | b.t.  | n.s.     |
| <b>IRF7</b>    | -2.78 | 2.11E-02 | b.t.  | n.s.     |
| <b>LCK</b>     | -2.78 | 2.17E-02 | b.t.  | n.s.     |
| <b>SKIL</b>    | -2.78 | 3.84E-02 | b.t.  | n.s.     |
| <b>CD37</b>    | -2.81 | 2.91E-02 | b.t.  | n.s.     |
| <b>BTG2</b>    | -2.83 | 9.00E-04 | -1.93 | 2.05E-02 |
| <b>DNAJC28</b> | -2.88 | 4.53E-02 | b.t.  | n.s.     |
| <b>FCGR2C</b>  | -2.88 | 5.00E-03 | -2.6  | 3.20E-02 |
| <b>FIG4</b>    | -2.88 | 3.80E-03 | b.t.  | n.s.     |
| <b>JAK2</b>    | -2.88 | 2.03E-02 | -1.66 | 4.80E-02 |
| <b>LMBRD1</b>  | -2.88 | 8.70E-03 | -1.83 | 4.12E-02 |

|           |       |          |       |          |
|-----------|-------|----------|-------|----------|
| HSH2D     | -2.99 | 2.21E-02 | b.t.  | n.s.     |
| ZCCHC2    | -3.03 | 2.00E-04 | -1.58 | 2.22E-02 |
| PYCARD    | -3.11 | 1.33E-02 | -2.24 | 2.77E-02 |
| RNASE6    | -3.12 | 3.93E-02 | -3.72 | 2.69E-02 |
| TMEM140   | -3.15 | 3.30E-03 | -2.14 | 3.08E-02 |
| EGR3      | -3.16 | 1.52E-02 | -1.63 | 4.58E-02 |
| CDKN1B    | -3.17 | 1.12E-02 | -2.18 | 3.69E-02 |
| FAM117B   | -3.17 | 2.90E-02 | b.t.  | n.s.     |
| TMEM19    | -3.19 | 8.30E-03 | -1.81 | 2.83E-02 |
| ANXA2R    | -3.2  | 1.80E-03 | -3.48 | 4.07E-02 |
| DDAH2     | -3.22 | 3.42E-02 | b.t.  | n.s.     |
| PPM1K     | -3.24 | 1.80E-03 | b.t.  | n.s.     |
| ACSF2     | -3.26 | 2.51E-02 | -1.89 | 1.82E-02 |
| SECISBP2L | -3.26 | 4.40E-03 | b.t.  | n.s.     |
| SLC12A6   | -3.29 | 3.80E-03 | -2.58 | 9.20E-03 |
| TNFRSF17  | -3.3  | 4.89E-02 | b.t.  | n.s.     |
| RASGEF1B  | -3.31 | 4.53E-02 | b.t.  | n.s.     |
| TNFSF13B  | -3.36 | 9.20E-03 | -5.57 | 9.70E-03 |
| EGR2      | -3.39 | 1.37E-02 | -11.4 | 3.70E-03 |
| NAGK      | -3.39 | 4.94E-02 | -3.04 | 3.18E-02 |
| N4BP1     | -3.4  | 2.20E-03 | -1.99 | 2.59E-02 |
| ZBP1      | -3.44 | 2.15E-02 | b.t.  | n.s.     |
| HMCES     | -3.45 | 1.05E-02 | -3.8  | 4.50E-03 |
| ORAI2     | -3.46 | 3.38E-02 | -3.18 | 3.33E-02 |
| WSB1      | -3.46 | 4.14E-02 | b.t.  | n.s.     |
| CXorf21   | -3.49 | 5.30E-03 | b.t.  | n.s.     |
| SLC39A10  | -3.49 | 2.73E-02 | -1.72 | 6.60E-03 |
| PRICKLE1  | -3.5  | 2.00E-04 | -1.95 | 8.00E-03 |
| LRRN1     | -3.51 | 4.03E-02 | b.t.  | n.s.     |

|          |       |          |       |          |
|----------|-------|----------|-------|----------|
| PATL2    | -3.52 | 1.05E-02 | b.t.  | n.s.     |
| PHKB     | -3.53 | 2.60E-03 | b.t.  | n.s.     |
| CYB561A3 | -3.59 | 1.57E-02 | b.t.  | n.s.     |
| INPP5F   | -3.61 | 2.80E-02 | b.t.  | n.s.     |
| CDC25B   | -3.62 | 3.03E-02 | b.t.  | n.s.     |
| ADRB2    | -3.67 | 7.84E-07 | b.t.  | n.s.     |
| LPIN2    | -3.69 | 1.47E-02 | b.t.  | n.s.     |
| CREBRF   | -3.7  | 1.37E-02 | b.t.  | n.s.     |
| FGD3     | -3.7  | 1.71E-02 | b.t.  | n.s.     |
| PTPRC    | -3.7  | 3.27E-02 | b.t.  | n.s.     |
| BCL2L14  | -3.76 | 1.64E-02 | b.t.  | n.s.     |
| SAT1     | -3.86 | 7.30E-03 | b.t.  | n.s.     |
| ST6GAL1  | -3.89 | 5.00E-04 | -2.37 | 1.56E-02 |
| SAMD9    | -3.91 | 3.50E-02 | b.t.  | n.s.     |
| DDX58    | -3.94 | 5.10E-03 | b.t.  | n.s.     |
| STAP1    | -3.95 | 4.00E-04 | b.t.  | n.s.     |
| GGA2     | -3.98 | 1.55E-02 | b.t.  | n.s.     |
| LGALS9B  | -4.02 | 1.32E-02 | b.t.  | n.s.     |
| EVL      | -4.08 | 4.00E-04 | -2.2  | 1.11E-02 |
| NCF4     | -4.08 | 5.00E-04 | -2.42 | 9.50E-03 |
| HIVEP2   | -4.14 | 6.30E-03 | b.t.  | n.s.     |
| ADAMTS6  | -4.15 | 4.91E-02 | b.t.  | n.s.     |
| TRIM22   | -4.15 | 2.54E-02 | b.t.  | n.s.     |
| GNAZ     | -4.18 | 3.50E-03 | b.t.  | n.s.     |
| MAP2     | -4.18 | 1.40E-03 | -2.34 | 4.90E-03 |
| FCGR2B   | -4.21 | 1.00E-02 | -3.58 | 3.11E-02 |
| LDLRAP1  | -4.21 | 3.73E-02 | -3.23 | 1.19E-02 |
| NR1D2    | -4.21 | 1.00E-03 | b.t.  | n.s.     |
| PLEKHA2  | -4.25 | 5.70E-03 | -4    | 4.90E-03 |

|         |       |          |       |          |
|---------|-------|----------|-------|----------|
| PTPN22  | -4.54 | 5.00E-04 | -4.2  | 1.20E-03 |
| DDX60L  | -4.7  | 3.70E-03 | b.t.  | n.s.     |
| MAP3K1  | -4.93 | 2.30E-03 | -2.71 | 1.97E-02 |
| ZNF652  | -4.98 | 1.01E-02 | b.t.  | n.s.     |
| CD79B   | -5.06 | 9.90E-03 | -3.66 | 1.04E-02 |
| RARRES3 | -5.11 | 1.20E-03 | b.t.  | n.s.     |
| SSBP2   | -5.12 | 1.58E-02 | b.t.  | n.s.     |
| DNMBP   | -5.15 | 1.20E-03 | -2.39 | 7.10E-03 |
| CHST12  | -5.27 | 2.00E-04 | b.t.  | n.s.     |
| SMCHD1  | -5.3  | 1.50E-03 | b.t.  | n.s.     |
| LAX1    | -5.31 | 4.70E-03 | b.t.  | n.s.     |
| GLIPR1  | -5.32 | 1.79E-02 | b.t.  | n.s.     |
| TMEM63A | -5.32 | 7.10E-03 | b.t.  | n.s.     |
| CD24    | -5.34 | 4.50E-03 | b.t.  | n.s.     |
| FAM111B | -5.34 | 2.92E-02 | b.t.  | n.s.     |
| CD69    | -5.43 | 8.00E-04 | b.t.  | n.s.     |
| OAS2    | -5.45 | 3.74E-02 | b.t.  | n.s.     |
| TRIB1   | -5.48 | 7.30E-03 | b.t.  | n.s.     |
| SLC44A2 | -5.49 | 1.70E-03 | b.t.  | n.s.     |
| OASL    | -5.57 | 2.36E-02 | b.t.  | n.s.     |
| PDE7B   | -5.82 | 1.65E-02 | b.t.  | n.s.     |
| GRK5    | -5.84 | 1.71E-02 | b.t.  | n.s.     |
| DDX60   | -5.9  | 3.64E-02 | b.t.  | n.s.     |
| PIK3IP1 | -6.2  | 3.91E-02 | b.t.  | n.s.     |
| CYSLTR1 | -6.24 | 1.80E-02 | -5    | 4.13E-02 |
| ALOX5   | -6.57 | 4.92E-02 | b.t.  | n.s.     |
| CLNK    | -6.81 | 2.98E-02 | b.t.  | n.s.     |
| SELL    | -6.81 | 3.14E-02 | b.t.  | n.s.     |
| TXNIP   | -7.03 | 3.00E-03 | -4.43 | 4.30E-03 |

|                 |        |          |        |          |
|-----------------|--------|----------|--------|----------|
| <b>NT5C3A</b>   | -7.07  | 8.00E-04 | b.t.   | n.s.     |
| <b>FCMR</b>     | -7.29  | 1.77E-02 | -8.41  | 2.92E-02 |
| <b>UTRN</b>     | -7.43  | 2.40E-03 | -3.04  | 3.63E-02 |
| <b>PRKCE</b>    | -7.54  | 5.00E-04 | b.t.   | n.s.     |
| <b>GNG7</b>     | -8.17  | 2.84E-02 | b.t.   | n.s.     |
| <b>PECAM1</b>   | -8.22  | 1.60E-03 | -5.7   | 2.90E-03 |
| <b>TNFSF10</b>  | -8.23  | 4.75E-02 | b.t.   | n.s.     |
| <b>HERC5</b>    | -9.17  | 4.93E-02 | b.t.   | n.s.     |
| <b>CD27</b>     | -9.26  | 4.33E-02 | -6.26  | 3.35E-02 |
| <b>SCIMP</b>    | -9.62  | 2.50E-03 | -8.11  | 7.50E-03 |
| <b>MX1</b>      | -9.81  | 2.63E-02 | b.t.   | n.s.     |
| <b>CTLA4</b>    | -10.83 | 2.71E-02 | -8.81  | 1.89E-02 |
| <b>MX2</b>      | -13.66 | 6.40E-03 | -8.47  | 1.99E-02 |
| <b>OAS1</b>     | -14.84 | 1.10E-03 | -5.09  | 4.80E-02 |
| <b>ISG15</b>    | -16.75 | 3.28E-02 | b.t.   | n.s.     |
| <b>CLMN</b>     | -18.03 | 1.70E-03 | -4.98  | 8.70E-03 |
| <b>IFIT2</b>    | -21.84 | 3.70E-03 | b.t.   | n.s.     |
| <b>RNASET2</b>  | -23.18 | 8.40E-03 | -11.18 | 3.70E-03 |
| <b>LY86</b>     | -23.52 | 3.77E-05 | -7.92  | 1.50E-03 |
| <b>IFI6</b>     | -40.37 | 1.67E-02 | b.t.   | n.s.     |
| <b>METTL7A</b>  | -45.92 | 8.60E-03 | -8.02  | 1.77E-02 |
| <b>ID3</b>      | -47.42 | 2.40E-03 | -27.39 | 1.80E-03 |
| <b>IFIT3</b>    | -63.03 | 1.92E-02 | b.t.   | n.s.     |
| <b>IFIT1</b>    | -64.88 | 2.30E-03 | b.t.   | n.s.     |
| <b>CCR6</b>     | -71.28 | 4.80E-03 | -14.23 | 1.48E-02 |
| <b>GPR183</b>   | b.t.   | n.s.     | 8.77   | 6.90E-03 |
| <b>ARHGAP31</b> | b.t.   | n.s.     | 4.82   | 4.67E-02 |
| <b>ADAMDEC1</b> | b.t.   | n.s.     | 4.62   | 2.06E-02 |
| <b>ST8SIA4</b>  | b.t.   | n.s.     | 3.86   | 1.55E-02 |

|                 |      |      |      |          |
|-----------------|------|------|------|----------|
| <b>NFKBIA</b>   | b.t. | n.s. | 3.41 | 5.30E-03 |
| <b>JUN</b>      | b.t. | n.s. | 3.3  | 9.00E-03 |
| <b>EPS15</b>    | b.t. | n.s. | 3.1  | 4.28E-02 |
| <b>TCFL5</b>    | b.t. | n.s. | 3.02 | 1.02E-02 |
| <b>FANCA</b>    | b.t. | n.s. | 2.7  | 7.60E-03 |
| <b>ERO1B</b>    | b.t. | n.s. | 2.21 | 1.41E-02 |
| <b>NR6A1</b>    | b.t. | n.s. | 2.19 | 2.23E-02 |
| <b>AURKA</b>    | b.t. | n.s. | 2.02 | 1.65E-02 |
| <b>PLA2G4C</b>  | b.t. | n.s. | 1.98 | 3.60E-02 |
| <b>KIF1C</b>    | b.t. | n.s. | 1.84 | 4.78E-02 |
| <b>TMEM161A</b> | b.t. | n.s. | 1.82 | 8.10E-03 |
| <b>IRAK1BP1</b> | b.t. | n.s. | 1.79 | 2.37E-02 |
| <b>SPINK14</b>  | b.t. | n.s. | 1.78 | 3.90E-03 |
| <b>ZC3HC1</b>   | b.t. | n.s. | 1.76 | 5.00E-04 |
| <b>CNTNAP4</b>  | b.t. | n.s. | 1.72 | 4.00E-04 |
| <b>ATP1A4</b>   | b.t. | n.s. | 1.69 | 4.70E-03 |
| <b>ORC5</b>     | b.t. | n.s. | 1.58 | 4.82E-02 |
| <b>OR10H2</b>   | b.t. | n.s. | 1.53 | 1.00E-02 |
| <b>TTC26</b>    | b.t. | n.s. | 1.53 | 5.80E-03 |
| <b>GNGT1</b>    | b.t. | n.s. | 1.51 | 4.97E-02 |
| <b>PAX6</b>     | b.t. | n.s. | 1.51 | 1.48E-02 |
| <b>VCAN</b>     | b.t. | n.s. | 1.51 | 1.60E-03 |
| <b>ZFHX2</b>    | b.t. | n.s. | 1.51 | 6.83E-05 |
| <b>MARVELD3</b> | b.t. | n.s. | 1.5  | 2.36E-02 |
| <b>OR51I2</b>   | b.t. | n.s. | -1.5 | 1.24E-02 |
| <b>CNPPD1</b>   | b.t. | n.s. | -1.5 | 3.60E-02 |
| <b>EFCAB14</b>  | b.t. | n.s. | -1.5 | 1.01E-02 |
| <b>SRGAP3</b>   | b.t. | n.s. | -1.5 | 3.54E-02 |
| <b>YWHAZ</b>    | b.t. | n.s. | -1.5 | 3.66E-02 |

|         |      |      |       |          |
|---------|------|------|-------|----------|
| TAS2R1  | b.t. | n.s. | -1.51 | 7.30E-03 |
| CALM1   | b.t. | n.s. | -1.51 | 3.88E-02 |
| SIGIRR  | b.t. | n.s. | -1.51 | 4.00E-04 |
| EXOC8   | b.t. | n.s. | -1.52 | 4.10E-02 |
| PPEF2   | b.t. | n.s. | -1.52 | 4.15E-02 |
| SPN     | b.t. | n.s. | -1.52 | 4.34E-02 |
| STK26   | b.t. | n.s. | -1.52 | 3.99E-02 |
| ACADM   | b.t. | n.s. | -1.53 | 3.73E-02 |
| CNST    | b.t. | n.s. | -1.53 | 2.34E-02 |
| GIN1    | b.t. | n.s. | -1.53 | 1.28E-02 |
| HP1BP3  | b.t. | n.s. | -1.53 | 2.03E-02 |
| PITX2   | b.t. | n.s. | -1.53 | 2.99E-02 |
| RNF185  | b.t. | n.s. | -1.53 | 3.48E-02 |
| ZNF468  | b.t. | n.s. | -1.53 | 2.80E-03 |
| HEATR5B | b.t. | n.s. | -1.54 | 3.97E-02 |
| ITGB7   | b.t. | n.s. | -1.54 | 2.27E-02 |
| ZBTB33  | b.t. | n.s. | -1.54 | 2.44E-02 |
| FLT1    | b.t. | n.s. | -1.55 | 1.00E-03 |
| SEC16A  | b.t. | n.s. | -1.55 | 1.96E-02 |
| STARD3  | b.t. | n.s. | -1.55 | 3.02E-02 |
| CCDC88C | b.t. | n.s. | -1.56 | 4.07E-02 |
| MIDN    | b.t. | n.s. | -1.56 | 8.60E-03 |
| PQLC2   | b.t. | n.s. | -1.57 | 3.27E-02 |
| PRKCZ   | b.t. | n.s. | -1.57 | 1.75E-02 |
| VPREB3  | b.t. | n.s. | -1.58 | 3.66E-02 |
| DCUN1D3 | b.t. | n.s. | -1.58 | 7.80E-03 |
| KDM3A   | b.t. | n.s. | -1.58 | 2.39E-02 |
| RAB38   | b.t. | n.s. | -1.59 | 8.40E-03 |
| CASP9   | b.t. | n.s. | -1.59 | 3.17E-02 |

|                        |      |      |       |          |
|------------------------|------|------|-------|----------|
| <b>LRCH4</b>           | b.t. | n.s. | -1.59 | 1.56E-02 |
| <b>SHC1</b>            | b.t. | n.s. | -1.59 | 1.55E-02 |
| <b>ZNF699</b>          | b.t. | n.s. | -1.59 | 1.52E-02 |
| <b>ANKS4B</b>          | b.t. | n.s. | -1.6  | 1.30E-02 |
| <b>CD6</b>             | b.t. | n.s. | -1.6  | 3.88E-02 |
| <b>CTS2</b>            | b.t. | n.s. | -1.6  | 3.73E-02 |
| <b>ITGAE</b>           | b.t. | n.s. | -1.6  | 3.20E-02 |
| <b>TAF4</b>            | b.t. | n.s. | -1.6  | 3.71E-02 |
| <b>LRP10</b>           | b.t. | n.s. | -1.61 | 3.93E-02 |
| <b>TNFSF12</b>         | b.t. | n.s. | -1.61 | 3.54E-02 |
| <b>PTCHD3</b>          | b.t. | n.s. | -1.62 | 3.06E-02 |
| <b>CHAMP1</b>          | b.t. | n.s. | -1.62 | 1.71E-02 |
| <b>FABP3</b>           | b.t. | n.s. | -1.62 | 2.00E-03 |
| <b>RNFT1</b>           | b.t. | n.s. | -1.62 | 1.88E-02 |
| <b>TNFSF12-TNFSF13</b> | b.t. | n.s. | -1.63 | 2.43E-02 |
| <b>ECI2</b>            | b.t. | n.s. | -1.65 | 4.66E-02 |
| <b>RAP1GAP2</b>        | b.t. | n.s. | -1.65 | 4.20E-02 |
| <b>REPS2</b>           | b.t. | n.s. | -1.65 | 2.71E-02 |
| <b>CH25H</b>           | b.t. | n.s. | -1.66 | 2.01E-02 |
| <b>ZNF768</b>          | b.t. | n.s. | -1.66 | 3.56E-02 |
| <b>TMEM53</b>          | b.t. | n.s. | -1.66 | 4.08E-02 |
| <b>TRIM69</b>          | b.t. | n.s. | -1.66 | 4.31E-02 |
| <b>WIPF1</b>           | b.t. | n.s. | -1.66 | 1.77E-02 |
| <b>DEF6</b>            | b.t. | n.s. | -1.67 | 1.06E-02 |
| <b>GPR82</b>           | b.t. | n.s. | -1.67 | 2.30E-03 |
| <b>SBF1</b>            | b.t. | n.s. | -1.67 | 4.13E-02 |
| <b>SRP68</b>           | b.t. | n.s. | -1.67 | 8.90E-03 |
| <b>DENND2C</b>         | b.t. | n.s. | -1.68 | 1.80E-02 |
| <b>ANKMY2</b>          | b.t. | n.s. | -1.69 | 1.56E-02 |

|                 |      |      |       |          |
|-----------------|------|------|-------|----------|
| <b>FOXN2</b>    | b.t. | n.s. | -1.69 | 1.73E-02 |
| <b>ZNF610</b>   | b.t. | n.s. | -1.69 | 1.88E-02 |
| <b>FAM78A</b>   | b.t. | n.s. | -1.7  | 2.39E-02 |
| <b>CTBP1</b>    | b.t. | n.s. | -1.71 | 2.84E-02 |
| <b>CUL4B</b>    | b.t. | n.s. | -1.71 | 4.74E-02 |
| <b>DENND6A</b>  | b.t. | n.s. | -1.71 | 1.66E-02 |
| <b>MOB3B</b>    | b.t. | n.s. | -1.71 | 6.00E-03 |
| <b>MTM1</b>     | b.t. | n.s. | -1.71 | 4.56E-02 |
| <b>DCLK2</b>    | b.t. | n.s. | -1.72 | 2.02E-02 |
| <b>KIAA1109</b> | b.t. | n.s. | -1.73 | 1.67E-02 |
| <b>SERTAD1</b>  | b.t. | n.s. | -1.73 | 1.74E-02 |
| <b>PTPRJ</b>    | b.t. | n.s. | -1.74 | 4.80E-02 |
| <b>SMYD2</b>    | b.t. | n.s. | -1.74 | 3.82E-02 |
| <b>FAM102B</b>  | b.t. | n.s. | -1.76 | 4.68E-02 |
| <b>FBXW11</b>   | b.t. | n.s. | -1.76 | 4.20E-03 |
| <b>HPS3</b>     | b.t. | n.s. | -1.77 | 1.30E-03 |
| <b>SAMD3</b>    | b.t. | n.s. | -1.77 | 9.10E-03 |
| <b>IRS2</b>     | b.t. | n.s. | -1.78 | 1.87E-02 |
| <b>ANXA11</b>   | b.t. | n.s. | -1.79 | 4.99E-02 |
| <b>SLC46A3</b>  | b.t. | n.s. | -1.79 | 4.07E-02 |
| <b>BTBD2</b>    | b.t. | n.s. | -1.8  | 4.68E-02 |
| <b>OSBPL3</b>   | b.t. | n.s. | -1.8  | 2.66E-02 |
| <b>FAM81A</b>   | b.t. | n.s. | -1.81 | 2.59E-02 |
| <b>MBNL1</b>    | b.t. | n.s. | -1.81 | 2.18E-02 |
| <b>RAB27B</b>   | b.t. | n.s. | -1.81 | 4.21E-02 |
| <b>TBC1D1</b>   | b.t. | n.s. | -1.81 | 2.54E-02 |
| <b>ABHD17A</b>  | b.t. | n.s. | -1.82 | 2.60E-03 |
| <b>CRTAP</b>    | b.t. | n.s. | -1.82 | 4.36E-02 |
| <b>HCST</b>     | b.t. | n.s. | -1.82 | 3.04E-02 |

|                 |      |      |       |          |
|-----------------|------|------|-------|----------|
| <b>PCYOX1</b>   | b.t. | n.s. | -1.82 | 1.94E-02 |
| <b>JAZF1</b>    | b.t. | n.s. | -1.84 | 4.02E-02 |
| <b>RASGEF1A</b> | b.t. | n.s. | -1.84 | 2.77E-02 |
| <b>CD5</b>      | b.t. | n.s. | -1.85 | 4.02E-02 |
| <b>TRIM14</b>   | b.t. | n.s. | -1.85 | 1.35E-02 |
| <b>CHML</b>     | b.t. | n.s. | -1.86 | 3.20E-03 |
| <b>HMOX1</b>    | b.t. | n.s. | -1.87 | 3.22E-02 |
| <b>PARP4</b>    | b.t. | n.s. | -1.87 | 3.00E-02 |
| <b>SMURF2</b>   | b.t. | n.s. | -1.87 | 2.02E-02 |
| <b>PPP2R5C</b>  | b.t. | n.s. | -1.88 | 2.24E-02 |
| <b>SIPA1L3</b>  | b.t. | n.s. | -1.88 | 4.44E-02 |
| <b>C16orf72</b> | b.t. | n.s. | -1.9  | 1.98E-02 |
| <b>CMTM3</b>    | b.t. | n.s. | -1.9  | 1.00E-03 |
| <b>PNPLA8</b>   | b.t. | n.s. | -1.92 | 4.13E-02 |
| <b>S1PR4</b>    | b.t. | n.s. | -1.92 | 6.20E-03 |
| <b>SIPA1</b>    | b.t. | n.s. | -1.92 | 3.49E-02 |
| <b>ATP6V0D1</b> | b.t. | n.s. | -1.95 | 2.82E-02 |
| <b>GMFG</b>     | b.t. | n.s. | -1.97 | 2.18E-02 |
| <b>KIF16B</b>   | b.t. | n.s. | -1.99 | 3.85E-02 |
| <b>IL12RB1</b>  | b.t. | n.s. | -2.02 | 9.50E-03 |
| <b>IER2</b>     | b.t. | n.s. | -2.04 | 4.00E-02 |
| <b>QPCT</b>     | b.t. | n.s. | -2.04 | 3.51E-02 |
| <b>TMEM117</b>  | b.t. | n.s. | -2.05 | 6.60E-03 |
| <b>SRGAP2</b>   | b.t. | n.s. | -2.07 | 2.81E-02 |
| <b>IL7</b>      | b.t. | n.s. | -2.08 | 4.60E-02 |
| <b>FXVD7</b>    | b.t. | n.s. | -2.1  | 6.50E-03 |
| <b>SIGLEC6</b>  | b.t. | n.s. | -2.11 | 2.00E-04 |
| <b>MARCH3</b>   | b.t. | n.s. | -2.13 | 3.50E-03 |
| <b>SOWAHD</b>   | b.t. | n.s. | -2.14 | 7.00E-04 |

|                 |      |      |       |          |
|-----------------|------|------|-------|----------|
| <b>ELMSAN1</b>  | b.t. | n.s. | -2.15 | 1.33E-02 |
| <b>LCP2</b>     | b.t. | n.s. | -2.15 | 2.59E-02 |
| <b>RPA1</b>     | b.t. | n.s. | -2.15 | 2.56E-02 |
| <b>AKAP6</b>    | b.t. | n.s. | -2.18 | 3.32E-02 |
| <b>MMP14</b>    | b.t. | n.s. | -2.18 | 1.83E-02 |
| <b>PHTF2</b>    | b.t. | n.s. | -2.19 | 1.96E-02 |
| <b>ARHGAP12</b> | b.t. | n.s. | -2.21 | 1.20E-03 |
| <b>SP4</b>      | b.t. | n.s. | -2.21 | 2.00E-02 |
| <b>DOK3</b>     | b.t. | n.s. | -2.22 | 1.16E-02 |
| <b>COTL1</b>    | b.t. | n.s. | -2.26 | 1.54E-02 |
| <b>DHRS1</b>    | b.t. | n.s. | -2.28 | 4.90E-02 |
| <b>FAM117A</b>  | b.t. | n.s. | -2.29 | 1.15E-02 |
| <b>RAC2</b>     | b.t. | n.s. | -2.29 | 4.73E-02 |
| <b>APBB1IP</b>  | b.t. | n.s. | -2.3  | 4.80E-02 |
| <b>GFOD1</b>    | b.t. | n.s. | -2.3  | 3.45E-02 |
| <b>ITGAL</b>    | b.t. | n.s. | -2.3  | 2.84E-02 |
| <b>MSRA</b>     | b.t. | n.s. | -2.31 | 2.29E-02 |
| <b>ZBTB38</b>   | b.t. | n.s. | -2.36 | 3.13E-02 |
| <b>APAF1</b>    | b.t. | n.s. | -2.4  | 4.91E-02 |
| <b>RBM43</b>    | b.t. | n.s. | -2.44 | 3.40E-03 |
| <b>ASAH1</b>    | b.t. | n.s. | -2.47 | 4.23E-02 |
| <b>EMP1</b>     | b.t. | n.s. | -2.47 | 4.30E-05 |
| <b>VAT1</b>     | b.t. | n.s. | -2.53 | 2.68E-02 |
| <b>ZNF791</b>   | b.t. | n.s. | -2.54 | 4.98E-02 |
| <b>XKRX</b>     | b.t. | n.s. | -2.55 | 3.35E-02 |
| <b>VAMP5</b>    | b.t. | n.s. | -2.56 | 3.70E-02 |
| <b>SIT1</b>     | b.t. | n.s. | -2.57 | 2.65E-02 |
| <b>DDIT3</b>    | b.t. | n.s. | -2.59 | 1.80E-02 |
| <b>SLC37A2</b>  | b.t. | n.s. | -2.6  | 8.00E-03 |

|          |      |      |        |          |
|----------|------|------|--------|----------|
| PHEX     | b.t. | n.s. | -2.69  | 1.22E-02 |
| LY6E     | b.t. | n.s. | -2.74  | 4.98E-02 |
| TSPO     | b.t. | n.s. | -2.75  | 2.65E-02 |
| CTNNA1   | b.t. | n.s. | -2.77  | 2.67E-02 |
| PKIA     | b.t. | n.s. | -2.77  | 1.82E-02 |
| ACP5     | b.t. | n.s. | -2.81  | 7.04E-05 |
| CD52     | b.t. | n.s. | -2.81  | 7.80E-03 |
| STX10    | b.t. | n.s. | -2.82  | 4.26E-02 |
| TMEM156  | b.t. | n.s. | -2.82  | 4.60E-02 |
| IL18BP   | b.t. | n.s. | -2.92  | 1.51E-02 |
| TMC8     | b.t. | n.s. | -2.92  | 2.20E-03 |
| KDM7A    | b.t. | n.s. | -2.96  | 4.51E-02 |
| PDLIM1   | b.t. | n.s. | -3.02  | 1.80E-03 |
| MAP4K1   | b.t. | n.s. | -3.22  | 2.18E-02 |
| ARHGAP18 | b.t. | n.s. | -3.59  | 3.65E-02 |
| PNOC     | b.t. | n.s. | -3.88  | 3.52E-02 |
| RHOC     | b.t. | n.s. | -3.89  | 2.10E-02 |
| CHST11   | b.t. | n.s. | -4.36  | 1.41E-02 |
| GPR34    | b.t. | n.s. | -4.63  | 4.68E-02 |
| PTPN6    | b.t. | n.s. | -4.68  | 2.39E-02 |
| PIK3CG   | b.t. | n.s. | -5.27  | 6.10E-03 |
| FGFBP2   | b.t. | n.s. | -5.34  | 2.94E-02 |
| LRMP     | b.t. | n.s. | -5.79  | 1.79E-02 |
| FAM102A  | b.t. | n.s. | -6.58  | 3.51E-02 |
| RHOBTB2  | b.t. | n.s. | -14.06 | 1.51E-02 |

| <b>Trisomy 12</b> | <b>Fold Change (CvsA)</b> | <b>P-val (CvsA)</b> | <b>Fold Change (DvsB)</b> | <b>P-val (DvsB)</b> |
|-------------------|---------------------------|---------------------|---------------------------|---------------------|
| CYBRD1            | 76.54                     | 1.60E-03            | 52.68                     | 3.00E-04            |
| AICDA             | 39.29                     | 6.10E-03            | 26.04                     | 6.10E-03            |

|                 |       |          |       |          |
|-----------------|-------|----------|-------|----------|
| <b>MGLL</b>     | 35.25 | 3.30E-02 | 33.68 | 4.50E-03 |
| <b>MYO1G</b>    | 30.12 | 1.20E-03 | 11.4  | 2.85E-02 |
| <b>FAM129A</b>  | 22.14 | 1.95E-02 | 6.21  | 3.02E-02 |
| <b>NCF2</b>     | 15.16 | 1.11E-02 | 9.64  | 1.67E-02 |
| <b>BLK</b>      | 10.48 | 1.66E-02 | 7.64  | 3.08E-02 |
| <b>TRAF1</b>    | 10.16 | 1.60E-02 | 3.79  | 1.38E-02 |
| <b>IL2RA</b>    | 9.32  | 2.58E-02 | 14.24 | 1.09E-02 |
| <b>NR6A1</b>    | 9.25  | 6.36E-06 | 5.73  | 1.24E-06 |
| <b>ARHGAP31</b> | 8.99  | 2.10E-03 | 3.24  | 1.23E-02 |
| <b>ST8SIA4</b>  | 8.39  | 2.10E-03 | 3.78  | 2.70E-03 |
| <b>PIK3CD</b>   | 8.2   | 3.00E-04 | b.t.  | n.s.     |
| <b>ABCD2</b>    | 7.98  | 5.50E-03 | 4.1   | 1.32E-02 |
| <b>HELLS</b>    | 7.59  | 5.00E-04 | 3.36  | 1.40E-03 |
| <b>CORO1A</b>   | 7.36  | 1.88E-02 | b.t.  | n.s.     |
| <b>GPR157</b>   | 7.24  | 6.80E-03 | 5.37  | 3.24E-02 |
| <b>SOX5</b>     | 7.2   | 2.66E-02 | 3.47  | 2.30E-02 |
| <b>NLRC5</b>    | 7.14  | 1.97E-02 | b.t.  | n.s.     |
| <b>KCNN4</b>    | 7.1   | 5.00E-04 | 2.29  | 2.93E-02 |
| <b>IKZF1</b>    | 6.89  | 4.00E-04 | b.t.  | n.s.     |
| <b>BHLHE40</b>  | 6.87  | 9.00E-04 | 2.93  | 3.70E-03 |
| <b>DNPH1</b>    | 6.73  | 2.91E-02 | b.t.  | n.s.     |
| <b>RNF145</b>   | 6.63  | 2.63E-02 | b.t.  | n.s.     |
| <b>MREG</b>     | 6.5   | 4.75E-02 | b.t.  | n.s.     |
| <b>LCP1</b>     | 6.39  | 1.90E-03 | 3.12  | 3.60E-03 |
| <b>HLA-DRB1</b> | 6.29  | 4.04E-02 | b.t.  | n.s.     |
| <b>STARD10</b>  | 6.24  | 6.00E-04 | 3.21  | 3.20E-03 |
| <b>JADE3</b>    | 6.18  | 1.47E-02 | b.t.  | n.s.     |
| <b>HLA-DPB1</b> | 6.17  | 2.06E-02 | b.t.  | n.s.     |
| <b>CYB5A</b>    | 5.76  | 8.83E-05 | 4.41  | 1.00E-04 |

|         |      |          |      |          |
|---------|------|----------|------|----------|
| ATP8A1  | 5.73 | 1.30E-03 | 2.11 | 2.66E-02 |
| PSMD2   | 5.62 | 4.47E-02 | b.t. | n.s.     |
| PIK3C2B | 5.51 | 7.60E-03 | b.t. | n.s.     |
| BSCL2   | 5.33 | 1.71E-02 | b.t. | n.s.     |
| NFKB2   | 5.29 | 5.00E-04 | 1.73 | 2.98E-02 |
| MFSD10  | 5.07 | 7.45E-05 | 4.38 | 4.80E-03 |
| STAT3   | 5.07 | 4.00E-02 | 2.57 | 2.66E-02 |
| RPL39L  | 4.88 | 2.08E-02 | 4.42 | 1.23E-02 |
| ZDHHC18 | 4.83 | 2.91E-02 | b.t. | n.s.     |
| ZBTB7B  | 4.78 | 6.60E-03 | b.t. | n.s.     |
| C9orf64 | 4.75 | 1.78E-02 | b.t. | n.s.     |
| SMIM14  | 4.73 | 2.39E-02 | 4.33 | 1.90E-02 |
| SLC2A5  | 4.7  | 1.67E-02 | b.t. | n.s.     |
| PPP1R9B | 4.69 | 1.00E-03 | 3.4  | 1.02E-02 |
| IFNGR1  | 4.65 | 1.17E-02 | 6.49 | 1.66E-02 |
| SFT2D1  | 4.63 | 1.76E-02 | 4.44 | 8.90E-03 |
| CARM1   | 4.59 | 1.40E-03 | 4.63 | 3.00E-04 |
| CTSH    | 4.55 | 1.04E-02 | 3.53 | 3.73E-02 |
| CCND2   | 4.42 | 4.92E-02 | b.t. | n.s.     |
| NBEAL2  | 4.41 | 4.10E-03 | 3.17 | 3.30E-02 |
| GPR132  | 4.4  | 2.77E-02 | 2.38 | 1.12E-02 |
| ALDH2   | 4.38 | 2.61E-02 | b.t. | n.s.     |
| SLC2A13 | 4.38 | 2.02E-02 | 4.45 | 3.60E-03 |
| C4orf46 | 4.32 | 3.93E-02 | 2.99 | 1.34E-02 |
| PARP1   | 4.32 | 4.71E-02 | b.t. | n.s.     |
| GPX4    | 4.3  | 3.76E-02 | b.t. | n.s.     |
| NCKAP1L | 4.27 | 1.20E-03 | b.t. | n.s.     |
| MYH9    | 4.25 | 3.18E-02 | b.t. | n.s.     |
| AP1S2   | 4.24 | 1.70E-03 | 2.33 | 8.20E-03 |

|         |      |          |      |          |
|---------|------|----------|------|----------|
| SLC20A1 | 4.24 | 6.10E-03 | 2.3  | 3.23E-02 |
| ARNTL2  | 4.23 | 1.62E-02 | 5.68 | 9.10E-03 |
| KLHL6   | 4.12 | 9.00E-04 | 2.21 | 2.62E-02 |
| RHOF    | 4.11 | 9.00E-03 | 3.69 | 6.70E-03 |
| SLX4IP  | 4.09 | 2.60E-03 | b.t. | n.s.     |
| HTRA2   | 4.05 | 2.10E-06 | 3.56 | 3.99E-05 |
| RPS6KA1 | 4.02 | 4.20E-03 | 1.88 | 6.00E-03 |
| SERF1A  | 3.96 | 2.32E-02 | b.t. | n.s.     |
| ACAD10  | 3.93 | 1.48E-02 | b.t. | n.s.     |
| EIF2D   | 3.9  | 6.50E-03 | 2.65 | 2.30E-02 |
| PTPRJ   | 3.86 | 5.60E-03 | b.t. | n.s.     |
| HTT     | 3.8  | 6.10E-03 | b.t. | n.s.     |
| TBC1D2B | 3.8  | 2.19E-02 | b.t. | n.s.     |
| S1PR2   | 3.79 | 3.41E-02 | b.t. | n.s.     |
| ARPC4   | 3.78 | 4.59E-02 | b.t. | n.s.     |
| CSF2RB  | 3.77 | 1.38E-02 | b.t. | n.s.     |
| BIRC3   | 3.66 | 1.47E-02 | 3.49 | 3.19E-02 |
| CEPT1   | 3.65 | 3.50E-03 | b.t. | n.s.     |
| TARBP1  | 3.58 | 1.21E-02 | 1.96 | 4.50E-02 |
| FGF2    | 3.57 | 4.81E-02 | b.t. | n.s.     |
| TBC1D9B | 3.57 | 3.30E-02 | b.t. | n.s.     |
| IGF2R   | 3.56 | 1.37E-02 | b.t. | n.s.     |
| IRF4    | 3.54 | 1.65E-02 | b.t. | n.s.     |
| RMDN1   | 3.54 | 1.43E-02 | b.t. | n.s.     |
| TP53BP2 | 3.54 | 1.15E-02 | 1.93 | 1.35E-02 |
| ETFB    | 3.5  | 4.17E-02 | b.t. | n.s.     |
| CYP2C18 | 3.47 | 1.66E-02 | 3.44 | 1.10E-03 |
| MKNK2   | 3.47 | 4.00E-04 | 2.77 | 5.50E-03 |
| SPINT2  | 3.47 | 1.15E-02 | b.t. | n.s.     |

|                 |      |          |      |          |
|-----------------|------|----------|------|----------|
| <b>FURIN</b>    | 3.45 | 1.69E-02 | b.t. | n.s.     |
| <b>RBPJ</b>     | 3.43 | 1.60E-03 | 2.5  | 4.10E-03 |
| <b>COX18</b>    | 3.42 | 3.00E-04 | b.t. | n.s.     |
| <b>PAX5</b>     | 3.42 | 1.73E-02 | 1.9  | 3.92E-02 |
| <b>RAP1A</b>    | 3.41 | 5.30E-03 | 2.12 | 4.70E-03 |
| <b>FAM156A</b>  | 3.37 | 5.60E-03 | b.t. | n.s.     |
| <b>SENP8</b>    | 3.34 | 3.42E-02 | b.t. | n.s.     |
| <b>ASXL1</b>    | 3.33 | 5.20E-03 | 3.49 | 9.10E-03 |
| <b>MBNL2</b>    | 3.31 | 1.85E-02 | b.t. | n.s.     |
| <b>P2RX4</b>    | 3.3  | 2.80E-02 | 3.07 | 4.85E-02 |
| <b>TSPAN33</b>  | 3.28 | 1.70E-03 | 3.98 | 6.60E-03 |
| <b>RAB13</b>    | 3.27 | 3.98E-02 | b.t. | n.s.     |
| <b>FAN1</b>     | 3.25 | 1.85E-02 | b.t. | n.s.     |
| <b>SRRD</b>     | 3.21 | 1.92E-02 | b.t. | n.s.     |
| <b>ADGRE5</b>   | 3.2  | 2.90E-03 | b.t. | n.s.     |
| <b>GCSAM</b>    | 3.17 | 1.62E-02 | 7    | 2.80E-03 |
| <b>SLAMF1</b>   | 3.17 | 3.44E-02 | 6.43 | 1.53E-02 |
| <b>RBM45</b>    | 3.15 | 2.38E-02 | b.t. | n.s.     |
| <b>TC2N</b>     | 3.15 | 4.88E-02 | b.t. | n.s.     |
| <b>NLRC4</b>    | 3.14 | 5.20E-03 | b.t. | n.s.     |
| <b>TIPRL</b>    | 3.14 | 3.59E-02 | b.t. | n.s.     |
| <b>PHYH</b>     | 3.13 | 2.80E-03 | 1.84 | 4.78E-02 |
| <b>PTGES2</b>   | 3.13 | 1.00E-03 | b.t. | n.s.     |
| <b>SLC25A46</b> | 3.13 | 2.18E-02 | b.t. | n.s.     |
| <b>TIFA</b>     | 3.11 | 2.05E-02 | 2.5  | 1.06E-02 |
| <b>PDGFA</b>    | 3.11 | 3.01E-02 | b.t. | n.s.     |
| <b>NKRF</b>     | 3.1  | 3.35E-02 | b.t. | n.s.     |
| <b>VDR</b>      | 3.1  | 5.00E-04 | 2.33 | 3.48E-02 |
| <b>ANAPC16</b>  | 3.09 | 2.47E-02 | b.t. | n.s.     |

|          |      |          |      |          |
|----------|------|----------|------|----------|
| ICAM1    | 3.09 | 4.20E-02 | b.t. | n.s.     |
| UBE2D1   | 3.09 | 1.56E-02 | b.t. | n.s.     |
| MGST3    | 3.07 | 3.56E-02 | b.t. | n.s.     |
| IFFO2    | 3.06 | 4.00E-04 | 2.68 | 6.90E-03 |
| NCK2     | 3.06 | 8.00E-04 | 1.64 | 8.00E-03 |
| PPM1M    | 3.06 | 3.69E-02 | b.t. | n.s.     |
| AVL9     | 3.05 | 1.99E-02 | b.t. | n.s.     |
| HMGCL    | 3.05 | 3.00E-02 | b.t. | n.s.     |
| VCL      | 3.05 | 1.50E-03 | b.t. | n.s.     |
| WRAP53   | 3.05 | 1.53E-02 | b.t. | n.s.     |
| HYOU1    | 3.03 | 4.20E-02 | b.t. | n.s.     |
| APOBEC3G | 3.03 | 2.42E-02 | 2.89 | 3.50E-02 |
| NME3     | 3.02 | 9.60E-03 | b.t. | n.s.     |
| SPIB     | 3.02 | 7.00E-03 | b.t. | n.s.     |
| TACO1    | 3.02 | 2.18E-02 | b.t. | n.s.     |
| MAP3K14  | 3.01 | 7.00E-03 | b.t. | n.s.     |
| BTN2A2   | 3    | 2.23E-02 | 1.97 | 4.86E-02 |
| TRAPPC3  | 3    | 4.91E-02 | b.t. | n.s.     |
| PROSER1  | 2.97 | 2.23E-02 | b.t. | n.s.     |
| RAPGEF1  | 2.97 | 4.19E-02 | b.t. | n.s.     |
| EIF3F    | 2.95 | 1.22E-02 | 1.51 | 4.05E-02 |
| RFFL     | 2.95 | 8.00E-03 | 1.75 | 2.04E-02 |
| NIPAL2   | 2.94 | 3.01E-02 | b.t. | n.s.     |
| ACLY     | 2.93 | 3.57E-02 | b.t. | n.s.     |
| IPP      | 2.93 | 9.40E-03 | b.t. | n.s.     |
| LCLAT1   | 2.93 | 1.32E-02 | b.t. | n.s.     |
| TIGD2    | 2.9  | 4.94E-02 | 2.72 | 1.25E-02 |
| PRDX5    | 2.88 | 3.60E-03 | 1.88 | 4.96E-02 |
| ZKSCAN7  | 2.88 | 9.70E-03 | 1.71 | 3.10E-03 |

|                 |      |          |      |          |
|-----------------|------|----------|------|----------|
| <b>CAPN1</b>    | 2.88 | 6.70E-03 | b.t. | n.s.     |
| <b>C17orf99</b> | 2.87 | 3.20E-03 | b.t. | n.s.     |
| <b>HINT2</b>    | 2.87 | 4.63E-02 | 2.17 | 2.59E-02 |
| <b>NCAPD2</b>   | 2.87 | 2.16E-02 | b.t. | n.s.     |
| <b>NDUFB8</b>   | 2.87 | 2.68E-02 | b.t. | n.s.     |
| <b>RAB9A</b>    | 2.86 | 6.50E-03 | 4.68 | 1.60E-03 |
| <b>TMEM260</b>  | 2.86 | 1.80E-02 | b.t. | n.s.     |
| <b>TRAF3</b>    | 2.86 | 5.70E-03 | 3    | 3.42E-02 |
| <b>NIT1</b>     | 2.85 | 1.70E-03 | b.t. | n.s.     |
| <b>GSK3B</b>    | 2.84 | 6.90E-03 | b.t. | n.s.     |
| <b>HTATIP2</b>  | 2.84 | 4.54E-02 | b.t. | n.s.     |
| <b>CXorf40B</b> | 2.83 | 2.97E-02 | b.t. | n.s.     |
| <b>MRPL55</b>   | 2.82 | 1.93E-02 | b.t. | n.s.     |
| <b>MTHFD1</b>   | 2.82 | 6.30E-03 | b.t. | n.s.     |
| <b>NEDD9</b>    | 2.82 | 2.60E-02 | b.t. | n.s.     |
| <b>TNFAIP3</b>  | 2.82 | 4.30E-03 | 9.84 | 2.00E-04 |
| <b>PGM2</b>     | 2.8  | 1.52E-02 | b.t. | n.s.     |
| <b>SQLE</b>     | 2.8  | 3.04E-02 | b.t. | n.s.     |
| <b>STX6</b>     | 2.8  | 3.00E-04 | b.t. | n.s.     |
| <b>GPX1</b>     | 2.79 | 3.90E-02 | b.t. | n.s.     |
| <b>TFDP2</b>    | 2.76 | 7.40E-03 | 3.42 | 8.00E-04 |
| <b>ZNF425</b>   | 2.74 | 4.00E-04 | b.t. | n.s.     |
| <b>FXR1</b>     | 2.73 | 3.80E-03 | 1.86 | 8.00E-03 |
| <b>ANP32A</b>   | 2.71 | 2.43E-02 | b.t. | n.s.     |
| <b>SUOX</b>     | 2.71 | 1.36E-02 | b.t. | n.s.     |
| <b>SLC25A23</b> | 2.7  | 4.18E-02 | b.t. | n.s.     |
| <b>CARS2</b>    | 2.69 | 1.34E-02 | b.t. | n.s.     |
| <b>STAT5A</b>   | 2.69 | 1.40E-03 | 2.24 | 6.00E-04 |
| <b>RCAN3</b>    | 2.67 | 2.70E-02 | b.t. | n.s.     |

|                 |      |          |      |          |
|-----------------|------|----------|------|----------|
| <b>NUDT19</b>   | 2.66 | 3.84E-02 | b.t. | n.s.     |
| <b>SDR39U1</b>  | 2.66 | 2.62E-02 | b.t. | n.s.     |
| <b>ACBD6</b>    | 2.65 | 1.90E-02 | b.t. | n.s.     |
| <b>MAPKAP1</b>  | 2.65 | 2.43E-02 | b.t. | n.s.     |
| <b>EMB</b>      | 2.64 | 4.19E-02 | b.t. | n.s.     |
| <b>TBC1D7</b>   | 2.62 | 3.96E-02 | b.t. | n.s.     |
| <b>TNFRSF14</b> | 2.61 | 1.52E-02 | b.t. | n.s.     |
| <b>ALDH6A1</b>  | 2.6  | 2.95E-02 | b.t. | n.s.     |
| <b>COQ5</b>     | 2.6  | 2.20E-02 | b.t. | n.s.     |
| <b>FAS</b>      | 2.6  | 4.46E-02 | 3.43 | 5.70E-03 |
| <b>RPL18</b>    | 2.6  | 2.38E-02 | 1.99 | 2.83E-02 |
| <b>HDHD2</b>    | 2.59 | 2.51E-02 | b.t. | n.s.     |
| <b>NBAS</b>     | 2.59 | 3.96E-02 | b.t. | n.s.     |
| <b>KIF3B</b>    | 2.58 | 9.00E-04 | 1.54 | 1.19E-02 |
| <b>SUPT7L</b>   | 2.58 | 6.50E-03 | b.t. | n.s.     |
| <b>ANP32E</b>   | 2.57 | 2.12E-02 | b.t. | n.s.     |
| <b>UBXN6</b>    | 2.57 | 4.90E-03 | b.t. | n.s.     |
| <b>RTTN</b>     | 2.56 | 1.62E-02 | b.t. | n.s.     |
| <b>CCDC28B</b>  | 2.53 | 1.88E-02 | b.t. | n.s.     |
| <b>IDH2</b>     | 2.53 | 1.48E-02 | b.t. | n.s.     |
| <b>RAD17</b>    | 2.53 | 9.00E-04 | b.t. | n.s.     |
| <b>ANAPC11</b>  | 2.52 | 4.94E-02 | b.t. | n.s.     |
| <b>IL23A</b>    | 2.51 | 1.30E-02 | b.t. | n.s.     |
| <b>NKIRAS2</b>  | 2.51 | 4.97E-02 | b.t. | n.s.     |
| <b>SLC35B3</b>  | 2.51 | 2.50E-03 | b.t. | n.s.     |
| <b>CFAP20</b>   | 2.5  | 2.30E-02 | b.t. | n.s.     |
| <b>PIH1D1</b>   | 2.5  | 2.86E-02 | b.t. | n.s.     |
| <b>CTAGE15</b>  | 2.49 | 1.70E-02 | 1.99 | 3.97E-02 |
| <b>SAMD1</b>    | 2.49 | 3.12E-02 | b.t. | n.s.     |

|                 |      |          |      |          |
|-----------------|------|----------|------|----------|
| <b>SSNA1</b>    | 2.48 | 2.00E-02 | b.t. | n.s.     |
| <b>CASZ1</b>    | 2.47 | 4.99E-02 | b.t. | n.s.     |
| <b>ADAT2</b>    | 2.46 | 3.38E-02 | b.t. | n.s.     |
| <b>CXorf40A</b> | 2.46 | 8.60E-03 | b.t. | n.s.     |
| <b>ELK3</b>     | 2.46 | 7.10E-03 | 1.98 | 4.73E-02 |
| <b>NOA1</b>     | 2.46 | 6.20E-03 | 1.55 | 2.06E-02 |
| <b>CCDC50</b>   | 2.45 | 2.50E-02 | 2.82 | 2.00E-03 |
| <b>FDPS</b>     | 2.45 | 4.91E-02 | b.t. | n.s.     |
| <b>GSTP1</b>    | 2.44 | 2.00E-03 | 2.03 | 8.80E-03 |
| <b>ECH1</b>     | 2.43 | 1.16E-02 | 1.76 | 2.42E-02 |
| <b>FGGY</b>     | 2.43 | 4.70E-03 | 2.17 | 2.00E-04 |
| <b>CERS4</b>    | 2.42 | 4.93E-02 | b.t. | n.s.     |
| <b>TUBGCP2</b>  | 2.42 | 2.24E-02 | b.t. | n.s.     |
| <b>POLA2</b>    | 2.41 | 2.70E-03 | 2.41 | 3.35E-02 |
| <b>ALAS1</b>    | 2.4  | 1.71E-02 | b.t. | n.s.     |
| <b>CAB39</b>    | 2.4  | 4.02E-02 | b.t. | n.s.     |
| <b>CYP2C8</b>   | 2.39 | 2.25E-02 | b.t. | n.s.     |
| <b>SEC11C</b>   | 2.39 | 2.90E-03 | 3.08 | 7.40E-03 |
| <b>SLC30A9</b>  | 2.39 | 3.49E-02 | b.t. | n.s.     |
| <b>VAV1</b>     | 2.39 | 2.00E-03 | b.t. | n.s.     |
| <b>ZYG11B</b>   | 2.39 | 3.00E-04 | b.t. | n.s.     |
| <b>HIBADH</b>   | 2.38 | 2.25E-02 | b.t. | n.s.     |
| <b>NAGA</b>     | 2.38 | 2.05E-02 | b.t. | n.s.     |
| <b>PABPC1L</b>  | 2.38 | 1.30E-02 | b.t. | n.s.     |
| <b>EML3</b>     | 2.37 | 2.03E-02 | b.t. | n.s.     |
| <b>LIX1L</b>    | 2.37 | 1.63E-02 | b.t. | n.s.     |
| <b>SEC61B</b>   | 2.36 | 4.19E-02 | b.t. | n.s.     |
| <b>TMEM218</b>  | 2.35 | 3.21E-02 | b.t. | n.s.     |
| <b>AGTRAP</b>   | 2.34 | 7.10E-03 | b.t. | n.s.     |

|         |      |          |      |          |
|---------|------|----------|------|----------|
| ATP6V1A | 2.34 | 1.19E-02 | b.t. | n.s.     |
| CUEDC2  | 2.34 | 2.58E-02 | b.t. | n.s.     |
| ELMOD2  | 2.34 | 4.51E-02 | b.t. | n.s.     |
| NCOA1   | 2.33 | 4.74E-02 | b.t. | n.s.     |
| ACSS2   | 2.32 | 3.74E-02 | b.t. | n.s.     |
| TMEM14C | 2.32 | 2.49E-02 | b.t. | n.s.     |
| UBA3    | 2.32 | 9.40E-03 | b.t. | n.s.     |
| DHTKD1  | 2.31 | 2.00E-02 | 1.55 | 3.50E-02 |
| FLOT2   | 2.31 | 2.71E-02 | b.t. | n.s.     |
| LONP2   | 2.31 | 8.20E-03 | b.t. | n.s.     |
| NDRG3   | 2.31 | 2.69E-02 | b.t. | n.s.     |
| PLD2    | 2.31 | 1.43E-02 | 2.29 | 1.61E-02 |
| RASSF2  | 2.31 | 2.77E-02 | b.t. | n.s.     |
| RFC2    | 2.31 | 3.38E-02 | 1.94 | 4.53E-02 |
| RPAP1   | 2.3  | 4.14E-02 | b.t. | n.s.     |
| VPS52   | 2.3  | 3.63E-02 | b.t. | n.s.     |
| DNMT3A  | 2.29 | 4.55E-02 | b.t. | n.s.     |
| RAD51B  | 2.29 | 2.23E-02 | b.t. | n.s.     |
| TAGLN2  | 2.29 | 1.09E-02 | 2.07 | 1.10E-02 |
| CEP192  | 2.28 | 2.41E-02 | 2.11 | 2.10E-02 |
| DHX16   | 2.28 | 3.23E-02 | b.t. | n.s.     |
| STAT5B  | 2.27 | 1.30E-03 | 3.32 | 7.95E-05 |
| TYK2    | 2.27 | 4.30E-03 | b.t. | n.s.     |
| H2AFV   | 2.26 | 2.36E-02 | 2.49 | 2.71E-02 |
| MED16   | 2.26 | 5.20E-03 | b.t. | n.s.     |
| MLH1    | 2.26 | 3.84E-02 | b.t. | n.s.     |
| MAP3K11 | 2.24 | 2.47E-02 | b.t. | n.s.     |
| MAU2    | 2.24 | 1.49E-02 | b.t. | n.s.     |
| KDM1B   | 2.21 | 1.02E-02 | b.t. | n.s.     |

|             |      |          |      |          |
|-------------|------|----------|------|----------|
| PPM1A       | 2.21 | 4.80E-03 | 3.15 | 1.00E-04 |
| PPP2R5D     | 2.21 | 2.60E-03 | b.t. | n.s.     |
| PRMT2       | 2.21 | 3.62E-02 | b.t. | n.s.     |
| RNF7        | 2.2  | 3.35E-02 | b.t. | n.s.     |
| ACTR1A      | 2.19 | 3.82E-02 | b.t. | n.s.     |
| CCDC6       | 2.18 | 1.23E-02 | 1.57 | 3.90E-03 |
| CPSF2       | 2.18 | 3.80E-03 | b.t. | n.s.     |
| ZNF284      | 2.18 | 4.59E-02 | b.t. | n.s.     |
| CD19        | 2.17 | 1.70E-03 | 2.31 | 9.50E-03 |
| MAPK14      | 2.15 | 3.53E-02 | b.t. | n.s.     |
| SEMA7A      | 2.15 | 3.46E-02 | b.t. | n.s.     |
| PCYT1A      | 2.14 | 3.16E-02 | b.t. | n.s.     |
| SLC9A7      | 2.14 | 1.50E-02 | b.t. | n.s.     |
| BIRC2       | 2.13 | 2.50E-03 | 2.1  | 1.50E-02 |
| DUSP22      | 2.13 | 4.37E-02 | 2.86 | 4.60E-03 |
| ARPC4-TTLL3 | 2.12 | 2.62E-02 | b.t. | n.s.     |
| ZADH2       | 2.12 | 2.98E-02 | b.t. | n.s.     |
| C12orf10    | 2.12 | 4.71E-02 | b.t. | n.s.     |
| CALU        | 2.12 | 4.49E-02 | b.t. | n.s.     |
| PPID        | 2.12 | 1.62E-02 | b.t. | n.s.     |
| DHRS7       | 2.11 | 9.10E-03 | b.t. | n.s.     |
| PPP1R7      | 2.11 | 1.35E-02 | 3.01 | 2.22E-02 |
| RNF214      | 2.11 | 1.50E-03 | b.t. | n.s.     |
| TTC5        | 2.11 | 4.66E-02 | b.t. | n.s.     |
| ATXN2L      | 2.1  | 3.80E-02 | b.t. | n.s.     |
| CCDC191     | 2.1  | 3.69E-02 | b.t. | n.s.     |
| DBI         | 2.1  | 5.70E-03 | 4.11 | 4.40E-03 |
| PIK3R1      | 2.1  | 3.24E-02 | b.t. | n.s.     |
| ATP11A      | 2.09 | 4.68E-02 | b.t. | n.s.     |

|                 |      |          |      |          |
|-----------------|------|----------|------|----------|
| <b>BLM</b>      | 2.09 | 1.34E-02 | 2.7  | 4.22E-02 |
| <b>EIF2AK1</b>  | 2.09 | 7.20E-03 | b.t. | n.s.     |
| <b>PIGK</b>     | 2.09 | 3.40E-02 | b.t. | n.s.     |
| <b>POGLUT1</b>  | 2.09 | 3.79E-02 | b.t. | n.s.     |
| <b>SHKBP1</b>   | 2.09 | 6.30E-03 | b.t. | n.s.     |
| <b>ETV3</b>     | 2.07 | 3.13E-02 | 1.78 | 9.10E-03 |
| <b>FASTKD3</b>  | 2.07 | 1.34E-02 | b.t. | n.s.     |
| <b>FBRS</b>     | 2.07 | 2.73E-02 | b.t. | n.s.     |
| <b>PIGS</b>     | 2.07 | 3.14E-02 | b.t. | n.s.     |
| <b>PHTF1</b>    | 2.06 | 4.32E-02 | b.t. | n.s.     |
| <b>FTO</b>      | 2.05 | 4.41E-02 | b.t. | n.s.     |
| <b>MAT2B</b>    | 2.05 | 3.66E-02 | b.t. | n.s.     |
| <b>CALM3</b>    | 2.04 | 3.40E-03 | 1.64 | 1.37E-02 |
| <b>DCAF8</b>    | 2.04 | 2.58E-02 | b.t. | n.s.     |
| <b>MAD2L2</b>   | 2.04 | 4.26E-02 | b.t. | n.s.     |
| <b>NDUFB9</b>   | 2.04 | 4.52E-02 | b.t. | n.s.     |
| <b>CNTF</b>     | 2.03 | 3.00E-03 | b.t. | n.s.     |
| <b>HMG20B</b>   | 2.03 | 4.20E-02 | b.t. | n.s.     |
| <b>MROH8</b>    | 2.03 | 7.90E-03 | b.t. | n.s.     |
| <b>C15orf41</b> | 2.02 | 2.55E-02 | b.t. | n.s.     |
| <b>C1RL</b>     | 2.02 | 3.20E-02 | b.t. | n.s.     |
| <b>CAPNS1</b>   | 2.02 | 3.42E-02 | b.t. | n.s.     |
| <b>PAIP1</b>    | 2.02 | 2.73E-02 | b.t. | n.s.     |
| <b>RYBP</b>     | 2.02 | 8.00E-04 | 1.82 | 9.60E-03 |
| <b>ACTR3B</b>   | 2.01 | 3.63E-02 | b.t. | n.s.     |
| <b>TNKS1BP1</b> | 2.01 | 3.50E-02 | b.t. | n.s.     |
| <b>WDR83OS</b>  | 2.01 | 3.31E-02 | b.t. | n.s.     |
| <b>IFNGR2</b>   | 2    | 3.49E-02 | b.t. | n.s.     |
| <b>PRKACA</b>   | 2    | 1.45E-02 | b.t. | n.s.     |

|          |      |          |      |          |
|----------|------|----------|------|----------|
| SLC12A4  | 2    | 4.20E-02 | b.t. | n.s.     |
| ZBTB5    | 1.99 | 4.08E-02 | b.t. | n.s.     |
| IL21R    | 1.99 | 8.10E-03 | b.t. | n.s.     |
| POT1     | 1.99 | 1.77E-02 | b.t. | n.s.     |
| TJAP1    | 1.99 | 7.20E-03 | b.t. | n.s.     |
| ARID3B   | 1.98 | 3.45E-02 | b.t. | n.s.     |
| FBXW2    | 1.98 | 4.50E-02 | b.t. | n.s.     |
| JAK3     | 1.98 | 2.12E-02 | b.t. | n.s.     |
| MED12    | 1.98 | 4.31E-02 | b.t. | n.s.     |
| WDR70    | 1.98 | 3.70E-03 | b.t. | n.s.     |
| HADHA    | 1.97 | 1.57E-02 | b.t. | n.s.     |
| MAP3K8   | 1.97 | 2.20E-02 | b.t. | n.s.     |
| P2RY10   | 1.97 | 4.66E-02 | b.t. | n.s.     |
| PRMT7    | 1.97 | 9.00E-03 | b.t. | n.s.     |
| SLC25A45 | 1.97 | 4.12E-02 | b.t. | n.s.     |
| UBA1     | 1.97 | 2.78E-02 | b.t. | n.s.     |
| BTAF1    | 1.96 | 2.20E-03 | b.t. | n.s.     |
| ICAM3    | 1.96 | 3.42E-02 | b.t. | n.s.     |
| PFKFB3   | 1.96 | 2.42E-02 | b.t. | n.s.     |
| TMOD1    | 1.96 | 5.20E-03 | 2.93 | 3.00E-04 |
| AP2S1    | 1.95 | 3.96E-02 | b.t. | n.s.     |
| CSK      | 1.95 | 1.51E-02 | b.t. | n.s.     |
| EEF2K    | 1.95 | 2.17E-02 | b.t. | n.s.     |
| ERCC4    | 1.95 | 1.46E-02 | b.t. | n.s.     |
| LPAR2    | 1.95 | 3.94E-02 | b.t. | n.s.     |
| CCDC102B | 1.94 | 3.62E-02 | b.t. | n.s.     |
| LZTR1    | 1.94 | 2.18E-02 | b.t. | n.s.     |
| SYNGR2   | 1.94 | 1.55E-02 | b.t. | n.s.     |
| TMTC2    | 1.94 | 8.40E-03 | b.t. | n.s.     |

|           |      |          |      |          |
|-----------|------|----------|------|----------|
| ZMIZ2     | 1.94 | 4.00E-02 | b.t. | n.s.     |
| GRN       | 1.93 | 4.13E-02 | b.t. | n.s.     |
| KLHL23    | 1.93 | 1.24E-02 | b.t. | n.s.     |
| PLGRKT    | 1.93 | 2.69E-02 | 2.09 | 2.28E-02 |
| PRIMPOL   | 1.93 | 4.58E-02 | 1.84 | 3.03E-02 |
| BNIP1     | 1.92 | 3.10E-02 | b.t. | n.s.     |
| SPRY3     | 1.92 | 4.16E-02 | b.t. | n.s.     |
| DCAF10    | 1.92 | 1.14E-02 | b.t. | n.s.     |
| ELMO1     | 1.92 | 3.78E-02 | b.t. | n.s.     |
| GINM1     | 1.92 | 1.10E-03 | b.t. | n.s.     |
| FPGT      | 1.91 | 4.58E-02 | b.t. | n.s.     |
| ACOT13    | 1.91 | 4.50E-02 | 2.04 | 4.13E-02 |
| EIF4ENIF1 | 1.91 | 3.03E-02 | b.t. | n.s.     |
| MITD1     | 1.91 | 1.80E-02 | b.t. | n.s.     |
| ZNF687    | 1.91 | 2.32E-02 | b.t. | n.s.     |
| GBA3      | 1.9  | 3.00E-02 | 1.58 | 6.10E-03 |
| MTERF4    | 1.9  | 1.73E-02 | 2.51 | 2.36E-02 |
| RPL7A     | 1.89 | 3.59E-02 | 1.67 | 2.94E-02 |
| GLE1      | 1.89 | 2.14E-02 | b.t. | n.s.     |
| RAC1      | 1.89 | 3.92E-02 | b.t. | n.s.     |
| TARDBP    | 1.89 | 1.74E-02 | b.t. | n.s.     |
| TMEM91    | 1.89 | 2.39E-02 | b.t. | n.s.     |
| ADAT1     | 1.88 | 4.30E-03 | b.t. | n.s.     |
| IAH1      | 1.88 | 3.82E-02 | 1.5  | 1.79E-02 |
| KDSR      | 1.88 | 1.88E-02 | b.t. | n.s.     |
| RPL7      | 1.88 | 2.86E-02 | b.t. | n.s.     |
| SLC25A35  | 1.88 | 3.24E-02 | b.t. | n.s.     |
| ASXL3     | 1.87 | 4.13E-02 | 1.53 | 4.65E-02 |
| BLVRA     | 1.87 | 2.10E-03 | 4.07 | 7.84E-05 |

|               |      |          |      |          |
|---------------|------|----------|------|----------|
| LNPEP         | 1.87 | 3.30E-02 | b.t. | n.s.     |
| NBR1          | 1.87 | 2.79E-02 | b.t. | n.s.     |
| AK3           | 1.86 | 5.60E-03 | b.t. | n.s.     |
| TXNL1         | 1.86 | 3.98E-02 | b.t. | n.s.     |
| XRCC1         | 1.86 | 3.22E-02 | b.t. | n.s.     |
| P2RX2         | 1.85 | 1.30E-03 | b.t. | n.s.     |
| SLC37A4       | 1.85 | 3.84E-02 | 1.61 | 1.34E-02 |
| AMPD3         | 1.85 | 4.15E-02 | b.t. | n.s.     |
| MRPL19        | 1.85 | 2.83E-02 | b.t. | n.s.     |
| RELT          | 1.85 | 4.96E-02 | b.t. | n.s.     |
| ZNF197        | 1.84 | 1.13E-02 | b.t. | n.s.     |
| CUTA          | 1.83 | 1.52E-02 | b.t. | n.s.     |
| ERCC2         | 1.83 | 3.34E-02 | b.t. | n.s.     |
| PSENE1        | 1.83 | 3.04E-02 | 1.99 | 2.45E-02 |
| WDSUB1        | 1.83 | 1.86E-02 | b.t. | n.s.     |
| CBR4          | 1.82 | 3.04E-02 | 2.01 | 1.78E-02 |
| NDFIP1        | 1.82 | 1.91E-02 | 1.7  | 1.28E-02 |
| GNG10         | 1.81 | 2.58E-02 | 1.84 | 2.94E-02 |
| SRGN          | 1.81 | 8.60E-03 | b.t. | n.s.     |
| CASD1         | 1.81 | 4.84E-02 | b.t. | n.s.     |
| DNAJC25-GNG10 | 1.8  | 4.26E-02 | b.t. | n.s.     |
| COL4A3BP      | 1.8  | 4.10E-03 | b.t. | n.s.     |
| EMC3          | 1.8  | 4.99E-02 | b.t. | n.s.     |
| GTF2B         | 1.8  | 4.34E-02 | b.t. | n.s.     |
| IFFO1         | 1.8  | 6.90E-03 | b.t. | n.s.     |
| ORC3          | 1.8  | 3.24E-02 | b.t. | n.s.     |
| ABHD17C       | 1.79 | 1.44E-02 | b.t. | n.s.     |
| NT5DC1        | 1.79 | 3.20E-03 | 1.6  | 2.32E-02 |
| RASGRP4       | 1.79 | 2.02E-02 | 7.04 | 2.40E-03 |

|                 |      |          |      |          |
|-----------------|------|----------|------|----------|
| <b>RNF121</b>   | 1.78 | 1.37E-02 | b.t. | n.s.     |
| <b>IPPK</b>     | 1.77 | 4.42E-02 | b.t. | n.s.     |
| <b>MFSD13A</b>  | 1.77 | 5.80E-03 | b.t. | n.s.     |
| <b>ANKLE2</b>   | 1.76 | 2.70E-02 | 2.53 | 3.51E-02 |
| <b>C6orf163</b> | 1.76 | 1.40E-02 | b.t. | n.s.     |
| <b>MBTD1</b>    | 1.76 | 3.33E-02 | b.t. | n.s.     |
| <b>SLC25A51</b> | 1.76 | 4.89E-02 | b.t. | n.s.     |
| <b>ANKRD52</b>  | 1.75 | 4.18E-02 | b.t. | n.s.     |
| <b>FAM19A2</b>  | 1.75 | 3.20E-03 | b.t. | n.s.     |
| <b>PAAF1</b>    | 1.75 | 1.33E-02 | b.t. | n.s.     |
| <b>EDEM1</b>    | 1.74 | 1.15E-02 | b.t. | n.s.     |
| <b>IL10RB</b>   | 1.74 | 3.59E-02 | 2.76 | 1.92E-02 |
| <b>LMLN</b>     | 1.74 | 2.27E-02 | b.t. | n.s.     |
| <b>PRR14</b>    | 1.74 | 3.08E-02 | b.t. | n.s.     |
| <b>ASL</b>      | 1.73 | 1.34E-02 | b.t. | n.s.     |
| <b>DDX6</b>     | 1.73 | 4.64E-02 | b.t. | n.s.     |
| <b>NRAS</b>     | 1.73 | 4.12E-02 | b.t. | n.s.     |
| <b>QTRT1</b>    | 1.73 | 1.44E-02 | b.t. | n.s.     |
| <b>TGIF2</b>    | 1.73 | 9.60E-03 | 1.9  | 4.88E-02 |
| <b>URGCP</b>    | 1.73 | 1.22E-02 | b.t. | n.s.     |
| <b>UVRAG</b>    | 1.73 | 1.69E-02 | 2.48 | 1.50E-03 |
| <b>CCDC150</b>  | 1.72 | 4.00E-03 | b.t. | n.s.     |
| <b>ERGIC3</b>   | 1.72 | 9.50E-03 | b.t. | n.s.     |
| <b>RPS18</b>    | 1.72 | 1.63E-02 | b.t. | n.s.     |
| <b>ANKS1A</b>   | 1.71 | 1.11E-02 | b.t. | n.s.     |
| <b>MFF</b>      | 1.71 | 3.98E-02 | b.t. | n.s.     |
| <b>NAPEPLD</b>  | 1.71 | 2.55E-02 | b.t. | n.s.     |
| <b>UBL4A</b>    | 1.71 | 3.60E-03 | b.t. | n.s.     |
| <b>HPS5</b>     | 1.7  | 1.59E-02 | b.t. | n.s.     |

|                 |      |          |      |          |
|-----------------|------|----------|------|----------|
| <b>PIGX</b>     | 1.7  | 3.92E-02 | 2.12 | 7.90E-03 |
| <b>PP2D1</b>    | 1.7  | 3.27E-02 | b.t. | n.s.     |
| <b>STK25</b>    | 1.7  | 3.21E-02 | b.t. | n.s.     |
| <b>RANBP6</b>   | 1.69 | 1.65E-02 | b.t. | n.s.     |
| <b>FAM3A</b>    | 1.69 | 3.12E-02 | b.t. | n.s.     |
| <b>PBX4</b>     | 1.69 | 3.87E-02 | b.t. | n.s.     |
| <b>TSTD2</b>    | 1.69 | 1.56E-02 | b.t. | n.s.     |
| <b>CCDC39</b>   | 1.68 | 2.01E-02 | b.t. | n.s.     |
| <b>ACBD4</b>    | 1.68 | 1.33E-02 | b.t. | n.s.     |
| <b>GOT2</b>     | 1.68 | 2.63E-02 | 2.39 | 8.00E-04 |
| <b>HHEX</b>     | 1.68 | 2.94E-02 | b.t. | n.s.     |
| <b>ITGAD</b>    | 1.68 | 3.00E-02 | b.t. | n.s.     |
| <b>NIF3L1</b>   | 1.67 | 3.66E-02 | b.t. | n.s.     |
| <b>SGSM3</b>    | 1.67 | 2.24E-02 | b.t. | n.s.     |
| <b>SLMAP</b>    | 1.67 | 3.71E-02 | b.t. | n.s.     |
| <b>ARID2</b>    | 1.66 | 4.97E-02 | b.t. | n.s.     |
| <b>MUC1</b>     | 1.66 | 3.05E-02 | b.t. | n.s.     |
| <b>NECAP2</b>   | 1.66 | 8.90E-03 | b.t. | n.s.     |
| <b>PIKFYVE</b>  | 1.66 | 2.71E-02 | b.t. | n.s.     |
| <b>PLL</b>      | 1.66 | 3.96E-02 | b.t. | n.s.     |
| <b>TADA3</b>    | 1.66 | 3.90E-02 | b.t. | n.s.     |
| <b>UNC80</b>    | 1.66 | 1.86E-02 | b.t. | n.s.     |
| <b>CORO6</b>    | 1.65 | 4.04E-02 | b.t. | n.s.     |
| <b>DENND1C</b>  | 1.65 | 1.79E-02 | b.t. | n.s.     |
| <b>FASTK</b>    | 1.65 | 2.60E-02 | b.t. | n.s.     |
| <b>MTA3</b>     | 1.65 | 1.53E-02 | b.t. | n.s.     |
| <b>PPP1R16A</b> | 1.65 | 5.30E-03 | b.t. | n.s.     |
| <b>TNIP2</b>    | 1.65 | 2.26E-02 | b.t. | n.s.     |
| <b>DAD1</b>     | 1.64 | 2.46E-02 | 1.61 | 4.50E-03 |

|          |      |          |      |          |
|----------|------|----------|------|----------|
| PID1     | 1.64 | 1.36E-02 | b.t. | n.s.     |
| SIRT7    | 1.64 | 3.12E-02 | b.t. | n.s.     |
| LAGE3    | 1.63 | 4.96E-02 | b.t. | n.s.     |
| CDC42    | 1.63 | 2.36E-02 | b.t. | n.s.     |
| CDNF     | 1.63 | 2.81E-02 | b.t. | n.s.     |
| FLOT1    | 1.63 | 3.58E-02 | 2.47 | 2.42E-02 |
| RPS21    | 1.63 | 3.23E-02 | b.t. | n.s.     |
| TBC1D22B | 1.63 | 4.19E-02 | b.t. | n.s.     |
| CSTA     | 1.62 | 3.94E-02 | b.t. | n.s.     |
| TMEM205  | 1.62 | 1.58E-02 | 1.55 | 1.66E-02 |
| CCDC57   | 1.61 | 5.10E-03 | b.t. | n.s.     |
| DCAF17   | 1.61 | 2.00E-04 | b.t. | n.s.     |
| PFKM     | 1.61 | 2.40E-03 | b.t. | n.s.     |
| INPP5D   | 1.6  | 5.90E-03 | b.t. | n.s.     |
| ADPRH    | 1.59 | 4.70E-02 | 2.05 | 3.97E-02 |
| CD58     | 1.59 | 4.52E-02 | b.t. | n.s.     |
| SMARCAL1 | 1.58 | 3.06E-02 | b.t. | n.s.     |
| COX8A    | 1.57 | 2.86E-02 | b.t. | n.s.     |
| HOMEZ    | 1.57 | 2.32E-02 | b.t. | n.s.     |
| NSUN3    | 1.57 | 4.47E-02 | b.t. | n.s.     |
| WDR82    | 1.57 | 4.20E-03 | b.t. | n.s.     |
| MARCH3   | 1.56 | 2.20E-02 | b.t. | n.s.     |
| PLCB3    | 1.56 | 1.60E-03 | b.t. | n.s.     |
| TTLL3    | 1.56 | 3.92E-02 | b.t. | n.s.     |
| ZNF678   | 1.56 | 3.17E-02 | b.t. | n.s.     |
| MGAM2    | 1.55 | 1.33E-02 | b.t. | n.s.     |
| NDUFA10  | 1.54 | 4.75E-02 | b.t. | n.s.     |
| CDH7     | 1.54 | 7.10E-03 | b.t. | n.s.     |
| HMGB4    | 1.54 | 3.88E-02 | b.t. | n.s.     |

|                 |       |          |      |          |
|-----------------|-------|----------|------|----------|
| <b>RNF4</b>     | 1.54  | 1.76E-02 | b.t. | n.s.     |
| <b>TCF7</b>     | 1.54  | 3.07E-02 | 1.71 | 1.30E-03 |
| <b>RNF148</b>   | 1.53  | 3.98E-02 | b.t. | n.s.     |
| <b>COA1</b>     | 1.53  | 4.45E-02 | 2.99 | 6.30E-03 |
| <b>MYL1</b>     | 1.53  | 2.18E-02 | b.t. | n.s.     |
| <b>TMEM120A</b> | 1.53  | 5.20E-03 | 2.82 | 1.10E-03 |
| <b>MTMR4</b>    | 1.52  | 6.30E-03 | b.t. | n.s.     |
| <b>PRG2</b>     | 1.52  | 4.38E-02 | b.t. | n.s.     |
| <b>DSTYK</b>    | 1.51  | 4.59E-02 | b.t. | n.s.     |
| <b>GRHPR</b>    | 1.51  | 3.24E-02 | 1.78 | 8.50E-03 |
| <b>NPR1</b>     | 1.51  | 1.52E-02 | b.t. | n.s.     |
| <b>WDR7</b>     | 1.51  | 3.07E-02 | b.t. | n.s.     |
| <b>LRCH3</b>    | 1.5   | 6.60E-03 | b.t. | n.s.     |
| <b>NIN</b>      | 1.5   | 2.50E-02 | b.t. | n.s.     |
| <b>RHNO1</b>    | 1.5   | 4.05E-02 | b.t. | n.s.     |
| <b>GDF2</b>     | -1.5  | 4.00E-04 | b.t. | n.s.     |
| <b>TNNC2</b>    | -1.5  | 8.50E-03 | b.t. | n.s.     |
| <b>CCDC174</b>  | -1.5  | 4.60E-03 | b.t. | n.s.     |
| <b>CXCR2</b>    | -1.5  | 1.65E-02 | b.t. | n.s.     |
| <b>HOXA3</b>    | -1.5  | 2.30E-03 | b.t. | n.s.     |
| <b>OLFM1</b>    | -1.5  | 8.30E-03 | b.t. | n.s.     |
| <b>SPDYE5</b>   | -1.51 | 1.84E-02 | b.t. | n.s.     |
| <b>ATP7B</b>    | -1.51 | 2.33E-02 | b.t. | n.s.     |
| <b>C1orf185</b> | -1.51 | 3.57E-02 | b.t. | n.s.     |
| <b>DNAJB4</b>   | -1.51 | 2.07E-02 | b.t. | n.s.     |
| <b>LEMD3</b>    | -1.51 | 4.15E-02 | b.t. | n.s.     |
| <b>LHX8</b>     | -1.51 | 2.32E-02 | b.t. | n.s.     |
| <b>TMEM212</b>  | -1.51 | 4.23E-02 | b.t. | n.s.     |
| <b>NPHS2</b>    | -1.52 | 1.72E-02 | b.t. | n.s.     |

|          |       |          |      |      |
|----------|-------|----------|------|------|
| ABCG2    | -1.52 | 1.82E-02 | b.t. | n.s. |
| ATP1A2   | -1.52 | 4.39E-02 | b.t. | n.s. |
| KEL      | -1.52 | 2.00E-02 | b.t. | n.s. |
| OBSCN    | -1.52 | 2.20E-02 | b.t. | n.s. |
| RTN4     | -1.52 | 1.28E-02 | b.t. | n.s. |
| ADCK5    | -1.53 | 3.26E-02 | b.t. | n.s. |
| ECE2     | -1.53 | 3.34E-02 | b.t. | n.s. |
| TCEAL2   | -1.53 | 1.34E-02 | b.t. | n.s. |
| TSPAN19  | -1.53 | 3.98E-02 | b.t. | n.s. |
| UNC13C   | -1.53 | 2.40E-03 | b.t. | n.s. |
| ESRP1    | -1.54 | 1.65E-02 | b.t. | n.s. |
| PDZD4    | -1.54 | 5.30E-03 | b.t. | n.s. |
| C6orf226 | -1.55 | 7.00E-03 | b.t. | n.s. |
| DPH3P1   | -1.55 | 2.92E-02 | b.t. | n.s. |
| EFHD1    | -1.55 | 3.70E-03 | b.t. | n.s. |
| ETV4     | -1.55 | 4.49E-02 | b.t. | n.s. |
| FAM177A1 | -1.55 | 4.12E-02 | b.t. | n.s. |
| PCDHB12  | -1.56 | 2.80E-02 | b.t. | n.s. |
| NT5C3A   | -1.56 | 3.94E-02 | b.t. | n.s. |
| PTGFRN   | -1.56 | 3.64E-02 | b.t. | n.s. |
| BHMT     | -1.57 | 2.08E-02 | b.t. | n.s. |
| C3orf20  | -1.57 | 8.80E-03 | b.t. | n.s. |
| CCL19    | -1.57 | 4.02E-02 | b.t. | n.s. |
| LRRN2    | -1.57 | 4.30E-03 | b.t. | n.s. |
| PIAS2    | -1.57 | 1.39E-02 | b.t. | n.s. |
| HRASLS   | -1.58 | 3.73E-02 | b.t. | n.s. |
| ACBD3    | -1.58 | 2.68E-02 | b.t. | n.s. |
| CAB39L   | -1.58 | 4.22E-02 | b.t. | n.s. |
| DPEP1    | -1.58 | 1.80E-03 | b.t. | n.s. |

|                |       |          |      |      |
|----------------|-------|----------|------|------|
| <b>KIF3C</b>   | -1.58 | 1.85E-02 | b.t. | n.s. |
| <b>MRPL50</b>  | -1.58 | 4.08E-02 | b.t. | n.s. |
| <b>SVEP1</b>   | -1.58 | 3.27E-02 | b.t. | n.s. |
| <b>TTLL6</b>   | -1.58 | 1.34E-02 | b.t. | n.s. |
| <b>H2AFY2</b>  | -1.59 | 3.76E-02 | b.t. | n.s. |
| <b>CHN1</b>    | -1.59 | 2.73E-02 | b.t. | n.s. |
| <b>GPX5</b>    | -1.59 | 1.84E-02 | b.t. | n.s. |
| <b>KCNJ14</b>  | -1.59 | 2.00E-04 | b.t. | n.s. |
| <b>NBPF4</b>   | -1.59 | 3.97E-02 | b.t. | n.s. |
| <b>RLIM</b>    | -1.59 | 3.00E-03 | b.t. | n.s. |
| <b>TRPM3</b>   | -1.59 | 3.17E-02 | b.t. | n.s. |
| <b>SCG5</b>    | -1.6  | 9.20E-03 | b.t. | n.s. |
| <b>TMEM251</b> | -1.6  | 2.38E-02 | b.t. | n.s. |
| <b>ALKBH4</b>  | -1.6  | 9.30E-03 | b.t. | n.s. |
| <b>EFR3A</b>   | -1.6  | 2.52E-02 | b.t. | n.s. |
| <b>NCAN</b>    | -1.6  | 6.40E-03 | b.t. | n.s. |
| <b>OSBPL6</b>  | -1.6  | 3.10E-03 | b.t. | n.s. |
| <b>ZNF202</b>  | -1.6  | 5.00E-04 | b.t. | n.s. |
| <b>ZNF773</b>  | -1.6  | 2.16E-02 | b.t. | n.s. |
| <b>KCNE1</b>   | -1.61 | 4.37E-02 | b.t. | n.s. |
| <b>SLC26A4</b> | -1.61 | 2.12E-02 | b.t. | n.s. |
| <b>GMPR</b>    | -1.62 | 3.41E-02 | b.t. | n.s. |
| <b>NCR3LG1</b> | -1.62 | 8.00E-03 | b.t. | n.s. |
| <b>OTOL1</b>   | -1.63 | 3.46E-02 | b.t. | n.s. |
| <b>ADIG</b>    | -1.63 | 4.50E-03 | b.t. | n.s. |
| <b>ARMC7</b>   | -1.63 | 3.01E-02 | b.t. | n.s. |
| <b>HLX</b>     | -1.63 | 2.65E-02 | b.t. | n.s. |
| <b>OBP2B</b>   | -1.64 | 3.97E-02 | b.t. | n.s. |
| <b>MMP10</b>   | -1.64 | 2.52E-02 | b.t. | n.s. |

|         |       |          |       |          |
|---------|-------|----------|-------|----------|
| SALL4   | -1.64 | 1.80E-02 | b.t.  | n.s.     |
| C2CD4C  | -1.65 | 2.12E-02 | b.t.  | n.s.     |
| FLG2    | -1.65 | 7.20E-03 | b.t.  | n.s.     |
| HSFY2   | -1.65 | 3.19E-02 | b.t.  | n.s.     |
| LMNTD2  | -1.65 | 1.31E-02 | b.t.  | n.s.     |
| MFSD2B  | -1.66 | 9.60E-03 | b.t.  | n.s.     |
| SMAD5   | -1.66 | 4.74E-02 | b.t.  | n.s.     |
| ZNF26   | -1.66 | 2.25E-02 | b.t.  | n.s.     |
| PRAC1   | -1.67 | 1.00E-02 | b.t.  | n.s.     |
| C5orf67 | -1.68 | 1.74E-02 | b.t.  | n.s.     |
| CERS3   | -1.68 | 1.38E-02 | b.t.  | n.s.     |
| CDSN    | -1.69 | 4.00E-03 | b.t.  | n.s.     |
| CA1     | -1.69 | 1.29E-02 | b.t.  | n.s.     |
| CST2    | -1.7  | 4.22E-02 | b.t.  | n.s.     |
| OR5B12  | -1.7  | 2.21E-02 | b.t.  | n.s.     |
| AKAP10  | -1.71 | 1.79E-02 | -1.76 | 3.52E-02 |
| EPB41L3 | -1.71 | 2.58E-02 | b.t.  | n.s.     |
| HRK     | -1.72 | 1.21E-02 | b.t.  | n.s.     |
| KLHDC4  | -1.73 | 3.00E-03 | -1.86 | 3.08E-02 |
| CCR10   | -1.74 | 3.36E-02 | b.t.  | n.s.     |
| CFAP77  | -1.75 | 3.20E-03 | b.t.  | n.s.     |
| OR4D11  | -1.75 | 1.48E-02 | b.t.  | n.s.     |
| ARHGEF2 | -1.76 | 6.80E-03 | b.t.  | n.s.     |
| DCAF8L2 | -1.76 | 6.00E-03 | b.t.  | n.s.     |
| DEFB121 | -1.76 | 2.74E-02 | b.t.  | n.s.     |
| AQP7    | -1.78 | 4.28E-02 | b.t.  | n.s.     |
| DCK     | -1.78 | 4.02E-02 | b.t.  | n.s.     |
| KRT81   | -1.8  | 7.28E-05 | b.t.  | n.s.     |
| DLL1    | -1.81 | 1.50E-02 | b.t.  | n.s.     |

|          |       |          |       |          |
|----------|-------|----------|-------|----------|
| PPEF2    | -1.81 | 5.40E-03 | b.t.  | n.s.     |
| ACOT9    | -1.82 | 3.32E-02 | b.t.  | n.s.     |
| C19orf73 | -1.83 | 3.40E-03 | b.t.  | n.s.     |
| MTSS1L   | -1.83 | 1.38E-02 | b.t.  | n.s.     |
| TBL1X    | -1.83 | 1.64E-02 | b.t.  | n.s.     |
| MRGPRX4  | -1.84 | 3.07E-02 | b.t.  | n.s.     |
| TMEM98   | -1.84 | 5.00E-04 | b.t.  | n.s.     |
| THRSP    | -1.85 | 3.98E-02 | b.t.  | n.s.     |
| PCK1     | -1.86 | 3.20E-03 | b.t.  | n.s.     |
| TRMT13   | -1.86 | 4.10E-02 | b.t.  | n.s.     |
| TUFT1    | -1.86 | 1.16E-02 | b.t.  | n.s.     |
| ZNF546   | -1.86 | 3.92E-02 | b.t.  | n.s.     |
| ALB      | -1.87 | 2.28E-02 | b.t.  | n.s.     |
| SEC31A   | -1.88 | 1.33E-02 | b.t.  | n.s.     |
| SLBP     | -1.89 | 2.28E-02 | b.t.  | n.s.     |
| FAM71A   | -1.9  | 1.60E-02 | b.t.  | n.s.     |
| PYGO2    | -1.9  | 2.47E-02 | b.t.  | n.s.     |
| CASC10   | -1.91 | 2.53E-02 | b.t.  | n.s.     |
| GPX6     | -1.91 | 2.00E-04 | b.t.  | n.s.     |
| ZCCHC2   | -1.94 | 2.49E-02 | -2.91 | 1.58E-02 |
| LIPN     | -1.95 | 2.00E-04 | b.t.  | n.s.     |
| TMEM140  | -1.95 | 1.47E-02 | -1.93 | 2.56E-02 |
| PEG10    | -1.96 | 4.58E-02 | b.t.  | n.s.     |
| AMBP     | -1.97 | 1.34E-02 | b.t.  | n.s.     |
| SIDT1    | -1.97 | 2.62E-02 | b.t.  | n.s.     |
| ARHGEF1  | -1.99 | 7.80E-03 | b.t.  | n.s.     |
| MIS18BP1 | -2    | 2.89E-02 | b.t.  | n.s.     |
| ST7L     | -2    | 2.61E-02 | b.t.  | n.s.     |
| TGFBR2   | -2    | 4.15E-02 | -2.29 | 2.40E-03 |

|                 |       |          |        |          |
|-----------------|-------|----------|--------|----------|
| <b>TMEM255B</b> | -2    | 4.10E-03 | b.t.   | n.s.     |
| <b>TNFSF13</b>  | -2    | 8.00E-03 | b.t.   | n.s.     |
| <b>INO80D</b>   | -2.01 | 2.62E-02 | b.t.   | n.s.     |
| <b>TRIM23</b>   | -2.08 | 2.87E-02 | b.t.   | n.s.     |
| <b>ZNF567</b>   | -2.1  | 3.75E-02 | b.t.   | n.s.     |
| <b>PKP4</b>     | -2.11 | 1.61E-02 | b.t.   | n.s.     |
| <b>DCAF4</b>    | -2.12 | 3.23E-02 | b.t.   | n.s.     |
| <b>FAM133B</b>  | -2.14 | 5.00E-03 | b.t.   | n.s.     |
| <b>ABHD16B</b>  | -2.17 | 4.10E-03 | b.t.   | n.s.     |
| <b>BHMT2</b>    | -2.19 | 2.00E-04 | b.t.   | n.s.     |
| <b>F13B</b>     | -2.2  | 3.64E-02 | b.t.   | n.s.     |
| <b>KLF5</b>     | -2.2  | 3.05E-02 | b.t.   | n.s.     |
| <b>PHACTR4</b>  | -2.2  | 2.67E-02 | b.t.   | n.s.     |
| <b>MGAT5</b>    | -2.26 | 6.20E-03 | -2.42  | 1.43E-02 |
| <b>MMP26</b>    | -2.28 | 3.00E-04 | b.t.   | n.s.     |
| <b>TRIM14</b>   | -2.38 | 5.50E-03 | -1.97  | 4.31E-02 |
| <b>DOCK4</b>    | -2.55 | 2.48E-02 | b.t.   | n.s.     |
| <b>DNM3</b>     | -2.66 | 8.40E-03 | b.t.   | n.s.     |
| <b>PARP8</b>    | -2.76 | 1.88E-02 | b.t.   | n.s.     |
| <b>PLK2</b>     | -2.8  | 4.17E-02 | b.t.   | n.s.     |
| <b>KAT6B</b>    | -2.81 | 3.28E-02 | -2.54  | 2.20E-02 |
| <b>MTFR1</b>    | -3.02 | 2.93E-02 | b.t.   | n.s.     |
| <b>RPS6KB1</b>  | -3.31 | 8.50E-03 | b.t.   | n.s.     |
| <b>CREM</b>     | -3.55 | 4.27E-02 | b.t.   | n.s.     |
| <b>HMCES</b>    | -4.08 | 1.43E-02 | -2.9   | 1.80E-02 |
| <b>XAF1</b>     | -5.68 | 2.56E-02 | -4.88  | 3.63E-02 |
| <b>BMP6</b>     | -6.87 | 3.06E-07 | -2.48  | 5.95E-05 |
| <b>OAS1</b>     | -9.43 | 3.31E-02 | -12.78 | 2.07E-02 |
| <b>RASGRP3</b>  | b.t.  | n.s.     | 10.79  | 2.94E-02 |

|                |      |      |      |          |
|----------------|------|------|------|----------|
| <b>EZH2</b>    | b.t. | n.s. | 9.34 | 1.64E-02 |
| <b>CLIC2</b>   | b.t. | n.s. | 9.14 | 7.90E-03 |
| <b>BATF3</b>   | b.t. | n.s. | 5.54 | 1.54E-02 |
| <b>RASSF4</b>  | b.t. | n.s. | 4.59 | 4.23E-02 |
| <b>S100A8</b>  | b.t. | n.s. | 4.37 | 9.60E-03 |
| <b>CHRNA6</b>  | b.t. | n.s. | 4.24 | 2.43E-02 |
| <b>TCFL5</b>   | b.t. | n.s. | 4.21 | 2.22E-02 |
| <b>UNC119</b>  | b.t. | n.s. | 4.03 | 6.80E-03 |
| <b>STPG1</b>   | b.t. | n.s. | 3.9  | 2.16E-02 |
| <b>TCTN1</b>   | b.t. | n.s. | 3.75 | 7.60E-03 |
| <b>TSPAN5</b>  | b.t. | n.s. | 3.59 | 3.12E-02 |
| <b>C4BPB</b>   | b.t. | n.s. | 3.57 | 4.00E-04 |
| <b>TNFRSF8</b> | b.t. | n.s. | 3.56 | 1.20E-03 |
| <b>HMSD</b>    | b.t. | n.s. | 3.54 | 1.34E-02 |
| <b>USP12</b>   | b.t. | n.s. | 3.38 | 2.80E-02 |
| <b>SEC61A2</b> | b.t. | n.s. | 3.37 | 2.33E-02 |
| <b>TMEM63B</b> | b.t. | n.s. | 3.36 | 4.13E-02 |
| <b>FLVCR2</b>  | b.t. | n.s. | 3.06 | 1.14E-02 |
| <b>ARID5A</b>  | b.t. | n.s. | 3.04 | 8.30E-03 |
| <b>CLIP2</b>   | b.t. | n.s. | 3    | 3.66E-02 |
| <b>FNBP1</b>   | b.t. | n.s. | 2.97 | 4.80E-02 |
| <b>LACTB</b>   | b.t. | n.s. | 2.93 | 3.80E-02 |
| <b>RBBP9</b>   | b.t. | n.s. | 2.9  | 7.00E-04 |
| <b>UBL7</b>    | b.t. | n.s. | 2.89 | 2.90E-03 |
| <b>NFKBIE</b>  | b.t. | n.s. | 2.85 | 2.67E-02 |
| <b>JUN</b>     | b.t. | n.s. | 2.79 | 1.96E-02 |
| <b>ERO1B</b>   | b.t. | n.s. | 2.78 | 3.30E-03 |
| <b>ETFA</b>    | b.t. | n.s. | 2.62 | 1.72E-02 |
| <b>SAMD13</b>  | b.t. | n.s. | 2.56 | 1.53E-02 |

|                |      |      |      |          |
|----------------|------|------|------|----------|
| <b>NFKBIA</b>  | b.t. | n.s. | 2.55 | 3.70E-03 |
| <b>CFLAR</b>   | b.t. | n.s. | 2.54 | 2.91E-02 |
| <b>CCL22</b>   | b.t. | n.s. | 2.44 | 8.30E-03 |
| <b>OXCT1</b>   | b.t. | n.s. | 2.43 | 4.76E-02 |
| <b>TRIP10</b>  | b.t. | n.s. | 2.31 | 1.98E-02 |
| <b>CCR7</b>    | b.t. | n.s. | 2.26 | 3.27E-02 |
| <b>GRINA</b>   | b.t. | n.s. | 2.24 | 3.91E-02 |
| <b>ARPC5</b>   | b.t. | n.s. | 2.22 | 3.91E-02 |
| <b>CTSB</b>    | b.t. | n.s. | 2.21 | 3.95E-02 |
| <b>PFDN4</b>   | b.t. | n.s. | 2.21 | 4.55E-02 |
| <b>ZNF660</b>  | b.t. | n.s. | 2.19 | 1.48E-02 |
| <b>SCARB1</b>  | b.t. | n.s. | 2.18 | 4.96E-02 |
| <b>DYRK4</b>   | b.t. | n.s. | 2.17 | 1.73E-02 |
| <b>GPR55</b>   | b.t. | n.s. | 2.14 | 4.23E-02 |
| <b>NUDT6</b>   | b.t. | n.s. | 2.14 | 2.71E-02 |
| <b>SYNPO</b>   | b.t. | n.s. | 2.14 | 2.59E-02 |
| <b>C1orf50</b> | b.t. | n.s. | 2.13 | 4.42E-02 |
| <b>TMSB4X</b>  | b.t. | n.s. | 2.09 | 2.23E-02 |
| <b>CCDC167</b> | b.t. | n.s. | 2.04 | 4.07E-02 |
| <b>FGD6</b>    | b.t. | n.s. | 2.02 | 1.60E-03 |
| <b>CR2</b>     | b.t. | n.s. | 2.01 | 2.50E-02 |
| <b>NACAD</b>   | b.t. | n.s. | 2.01 | 1.25E-02 |
| <b>RBMX2</b>   | b.t. | n.s. | 1.98 | 2.63E-02 |
| <b>ASPM</b>    | b.t. | n.s. | 1.96 | 2.00E-03 |
| <b>SMCO2</b>   | b.t. | n.s. | 1.96 | 7.90E-03 |
| <b>TIMM17B</b> | b.t. | n.s. | 1.95 | 3.48E-02 |
| <b>BASP1</b>   | b.t. | n.s. | 1.94 | 2.64E-02 |
| <b>RAP2A</b>   | b.t. | n.s. | 1.94 | 4.50E-02 |
| <b>APOC2</b>   | b.t. | n.s. | 1.92 | 1.31E-02 |

|                |      |      |      |          |
|----------------|------|------|------|----------|
| <b>ELP6</b>    | b.t. | n.s. | 1.92 | 3.49E-02 |
| <b>GPM6B</b>   | b.t. | n.s. | 1.92 | 3.93E-02 |
| <b>OIT3</b>    | b.t. | n.s. | 1.92 | 2.20E-03 |
| <b>PGBD4</b>   | b.t. | n.s. | 1.9  | 4.98E-02 |
| <b>CRTC2</b>   | b.t. | n.s. | 1.9  | 2.59E-02 |
| <b>MRPL40</b>  | b.t. | n.s. | 1.9  | 1.56E-02 |
| <b>PARK7</b>   | b.t. | n.s. | 1.9  | 9.10E-03 |
| <b>CBLN3</b>   | b.t. | n.s. | 1.88 | 1.68E-02 |
| <b>ANGEL2</b>  | b.t. | n.s. | 1.88 | 1.96E-02 |
| <b>DPH5</b>    | b.t. | n.s. | 1.88 | 4.00E-03 |
| <b>FSIP1</b>   | b.t. | n.s. | 1.88 | 4.80E-03 |
| <b>LYN</b>     | b.t. | n.s. | 1.88 | 2.11E-02 |
| <b>SLC2A6</b>  | b.t. | n.s. | 1.87 | 4.07E-02 |
| <b>PFN1</b>    | b.t. | n.s. | 1.85 | 3.79E-02 |
| <b>SUMO2</b>   | b.t. | n.s. | 1.85 | 1.62E-02 |
| <b>COMMD1</b>  | b.t. | n.s. | 1.84 | 1.44E-02 |
| <b>LYPLAL1</b> | b.t. | n.s. | 1.84 | 3.93E-02 |
| <b>RPL18A</b>  | b.t. | n.s. | 1.84 | 3.81E-02 |
| <b>C5orf63</b> | b.t. | n.s. | 1.83 | 3.27E-02 |
| <b>INAFM2</b>  | b.t. | n.s. | 1.83 | 1.86E-02 |
| <b>THEMIS2</b> | b.t. | n.s. | 1.83 | 3.35E-02 |
| <b>USP32</b>   | b.t. | n.s. | 1.82 | 4.45E-02 |
| <b>DEFB115</b> | b.t. | n.s. | 1.81 | 3.70E-02 |
| <b>SNN</b>     | b.t. | n.s. | 1.8  | 1.26E-02 |
| <b>MTFR1L</b>  | b.t. | n.s. | 1.79 | 2.04E-02 |
| <b>RPL24</b>   | b.t. | n.s. | 1.79 | 4.98E-02 |
| <b>SOCS2</b>   | b.t. | n.s. | 1.78 | 1.50E-02 |
| <b>UBLCP1</b>  | b.t. | n.s. | 1.78 | 2.92E-02 |
| <b>C6orf99</b> | b.t. | n.s. | 1.77 | 3.03E-02 |

|                  |      |      |      |          |
|------------------|------|------|------|----------|
| <b>POMT1</b>     | b.t. | n.s. | 1.77 | 3.98E-02 |
| <b>LIPK</b>      | b.t. | n.s. | 1.76 | 1.80E-02 |
| <b>RP1L1</b>     | b.t. | n.s. | 1.76 | 1.00E-04 |
| <b>TRIM24</b>    | b.t. | n.s. | 1.74 | 1.19E-02 |
| <b>SNX10</b>     | b.t. | n.s. | 1.73 | 2.32E-02 |
| <b>CFAP54</b>    | b.t. | n.s. | 1.71 | 1.08E-02 |
| <b>UBA5</b>      | b.t. | n.s. | 1.71 | 3.66E-02 |
| <b>FADD</b>      | b.t. | n.s. | 1.7  | 1.36E-02 |
| <b>GABRG2</b>    | b.t. | n.s. | 1.7  | 1.30E-02 |
| <b>ANXA13</b>    | b.t. | n.s. | 1.7  | 2.57E-02 |
| <b>AZGP1</b>     | b.t. | n.s. | 1.69 | 2.79E-02 |
| <b>AHCYL2</b>    | b.t. | n.s. | 1.68 | 3.75E-02 |
| <b>SERTAD2</b>   | b.t. | n.s. | 1.68 | 1.78E-02 |
| <b>DCBLD2</b>    | b.t. | n.s. | 1.67 | 3.25E-02 |
| <b>DLL4</b>      | b.t. | n.s. | 1.67 | 3.44E-02 |
| <b>LYG1</b>      | b.t. | n.s. | 1.67 | 3.60E-02 |
| <b>P2RY13</b>    | b.t. | n.s. | 1.66 | 2.90E-03 |
| <b>PTH</b>       | b.t. | n.s. | 1.66 | 1.14E-02 |
| <b>DAB1</b>      | b.t. | n.s. | 1.66 | 4.30E-02 |
| <b>KRT79</b>     | b.t. | n.s. | 1.66 | 6.00E-04 |
| <b>ROM1</b>      | b.t. | n.s. | 1.66 | 1.00E-04 |
| <b>KRTAP19-7</b> | b.t. | n.s. | 1.65 | 4.76E-02 |
| <b>ADGRF1</b>    | b.t. | n.s. | 1.65 | 2.54E-02 |
| <b>SPATA31C1</b> | b.t. | n.s. | 1.65 | 1.58E-02 |
| <b>ZNF648</b>    | b.t. | n.s. | 1.63 | 6.00E-04 |
| <b>PIM2</b>      | b.t. | n.s. | 1.63 | 4.00E-02 |
| <b>CHRNB4</b>    | b.t. | n.s. | 1.62 | 2.90E-03 |
| <b>IFNA5</b>     | b.t. | n.s. | 1.62 | 1.64E-02 |
| <b>CASQ1</b>     | b.t. | n.s. | 1.62 | 5.20E-03 |

|                 |      |      |      |          |
|-----------------|------|------|------|----------|
| <b>FBXO4</b>    | b.t. | n.s. | 1.62 | 5.00E-04 |
| <b>UBE2K</b>    | b.t. | n.s. | 1.62 | 4.70E-02 |
| <b>ZCCHC7</b>   | b.t. | n.s. | 1.62 | 1.20E-03 |
| <b>DARS</b>     | b.t. | n.s. | 1.61 | 3.22E-02 |
| <b>NINJ1</b>    | b.t. | n.s. | 1.6  | 3.86E-02 |
| <b>PTPRR</b>    | b.t. | n.s. | 1.6  | 2.81E-02 |
| <b>CLIC6</b>    | b.t. | n.s. | 1.59 | 3.90E-03 |
| <b>DZIP3</b>    | b.t. | n.s. | 1.59 | 2.38E-02 |
| <b>KIAA0391</b> | b.t. | n.s. | 1.59 | 4.41E-02 |
| <b>IGSF9B</b>   | b.t. | n.s. | 1.58 | 4.52E-02 |
| <b>MKS1</b>     | b.t. | n.s. | 1.58 | 4.21E-02 |
| <b>NENF</b>     | b.t. | n.s. | 1.58 | 4.92E-02 |
| <b>IFT52</b>    | b.t. | n.s. | 1.57 | 3.58E-02 |
| <b>KBTBD12</b>  | b.t. | n.s. | 1.57 | 1.16E-02 |
| <b>ZNF358</b>   | b.t. | n.s. | 1.57 | 2.30E-03 |
| <b>MAP3K6</b>   | b.t. | n.s. | 1.56 | 4.79E-02 |
| <b>NXF5</b>     | b.t. | n.s. | 1.56 | 3.30E-02 |
| <b>PSMG3</b>    | b.t. | n.s. | 1.56 | 4.28E-02 |
| <b>ATP1B4</b>   | b.t. | n.s. | 1.55 | 8.50E-03 |
| <b>ZNF696</b>   | b.t. | n.s. | 1.55 | 2.83E-02 |
| <b>ADCY10</b>   | b.t. | n.s. | 1.55 | 3.52E-02 |
| <b>ARHGAP23</b> | b.t. | n.s. | 1.55 | 3.04E-02 |
| <b>GIPC2</b>    | b.t. | n.s. | 1.54 | 1.72E-02 |
| <b>LRIG1</b>    | b.t. | n.s. | 1.54 | 3.64E-02 |
| <b>SERPINB3</b> | b.t. | n.s. | 1.54 | 2.29E-02 |
| <b>RGR</b>      | b.t. | n.s. | 1.54 | 9.90E-03 |
| <b>SLC6A11</b>  | b.t. | n.s. | 1.54 | 1.76E-02 |
| <b>TIMP4</b>    | b.t. | n.s. | 1.54 | 1.45E-02 |
| <b>MOG</b>      | b.t. | n.s. | 1.53 | 4.37E-02 |

|                 |      |      |       |          |
|-----------------|------|------|-------|----------|
| <b>NOXRED1</b>  | b.t. | n.s. | 1.53  | 2.19E-02 |
| <b>ZSCAN4</b>   | b.t. | n.s. | 1.52  | 7.30E-03 |
| <b>RIMS2</b>    | b.t. | n.s. | 1.52  | 2.72E-02 |
| <b>RPS6KL1</b>  | b.t. | n.s. | 1.52  | 2.45E-02 |
| <b>VEPH1</b>    | b.t. | n.s. | 1.52  | 4.91E-02 |
| <b>HESX1</b>    | b.t. | n.s. | 1.51  | 4.28E-02 |
| <b>PENK</b>     | b.t. | n.s. | 1.51  | 8.70E-03 |
| <b>STAC</b>     | b.t. | n.s. | 1.51  | 1.84E-02 |
| <b>OCM</b>      | b.t. | n.s. | 1.5   | 3.92E-02 |
| <b>CLEC18C</b>  | b.t. | n.s. | 1.5   | 2.24E-02 |
| <b>LY6H</b>     | b.t. | n.s. | 1.5   | 1.60E-02 |
| <b>MALSU1</b>   | b.t. | n.s. | 1.5   | 2.07E-02 |
| <b>PRRT3</b>    | b.t. | n.s. | 1.5   | 2.00E-02 |
| <b>SASS6</b>    | b.t. | n.s. | 1.5   | 3.33E-02 |
| <b>TMEM144</b>  | b.t. | n.s. | 1.5   | 4.10E-02 |
| <b>DGKD</b>     | b.t. | n.s. | -1.5  | 1.58E-02 |
| <b>ARHGEF40</b> | b.t. | n.s. | -1.5  | 9.60E-03 |
| <b>COX4I2</b>   | b.t. | n.s. | -1.5  | 3.51E-02 |
| <b>BACH2</b>    | b.t. | n.s. | -1.52 | 3.41E-02 |
| <b>DAW1</b>     | b.t. | n.s. | -1.52 | 7.40E-03 |
| <b>HARS2</b>    | b.t. | n.s. | -1.52 | 3.71E-02 |
| <b>USP31</b>    | b.t. | n.s. | -1.53 | 3.28E-02 |
| <b>CMYA5</b>    | b.t. | n.s. | -1.54 | 3.44E-02 |
| <b>GPR107</b>   | b.t. | n.s. | -1.54 | 1.45E-02 |
| <b>SHC4</b>     | b.t. | n.s. | -1.54 | 1.00E-02 |
| <b>GAPVD1</b>   | b.t. | n.s. | -1.55 | 3.64E-02 |
| <b>MTMR3</b>    | b.t. | n.s. | -1.55 | 4.92E-02 |
| <b>EIF2AK3</b>  | b.t. | n.s. | -1.56 | 3.19E-02 |
| <b>SEMA4B</b>   | b.t. | n.s. | -1.56 | 3.99E-02 |

|                 |      |      |       |          |
|-----------------|------|------|-------|----------|
| <b>TRAF2</b>    | b.t. | n.s. | -1.56 | 1.23E-02 |
| <b>INSL5</b>    | b.t. | n.s. | -1.57 | 6.60E-03 |
| <b>AQP12A</b>   | b.t. | n.s. | -1.57 | 7.00E-04 |
| <b>LINGO2</b>   | b.t. | n.s. | -1.57 | 1.71E-02 |
| <b>PDPK1</b>    | b.t. | n.s. | -1.57 | 2.48E-02 |
| <b>OR4C12</b>   | b.t. | n.s. | -1.59 | 6.00E-04 |
| <b>CTDP1</b>    | b.t. | n.s. | -1.59 | 3.02E-02 |
| <b>KCNH1</b>    | b.t. | n.s. | -1.59 | 1.36E-02 |
| <b>SULT1A1</b>  | b.t. | n.s. | -1.59 | 2.52E-02 |
| <b>RRN3</b>     | b.t. | n.s. | -1.6  | 3.98E-02 |
| <b>TANC1</b>    | b.t. | n.s. | -1.6  | 5.40E-03 |
| <b>TYW1B</b>    | b.t. | n.s. | -1.6  | 2.79E-02 |
| <b>SIM1</b>     | b.t. | n.s. | -1.61 | 2.15E-02 |
| <b>SMAD3</b>    | b.t. | n.s. | -1.61 | 1.69E-02 |
| <b>SERPINA9</b> | b.t. | n.s. | -1.65 | 3.04E-02 |
| <b>ANKMY1</b>   | b.t. | n.s. | -1.66 | 1.03E-02 |
| <b>CPEB2</b>    | b.t. | n.s. | -1.66 | 4.36E-02 |
| <b>HSDL1</b>    | b.t. | n.s. | -1.67 | 3.97E-02 |
| <b>SPATA25</b>  | b.t. | n.s. | -1.68 | 4.31E-02 |
| <b>FAM169A</b>  | b.t. | n.s. | -1.68 | 1.32E-02 |
| <b>SLC9B2</b>   | b.t. | n.s. | -1.7  | 1.57E-02 |
| <b>SRD5A1</b>   | b.t. | n.s. | -1.71 | 2.01E-02 |
| <b>GIGYF2</b>   | b.t. | n.s. | -1.75 | 3.63E-02 |
| <b>TOE1</b>     | b.t. | n.s. | -1.75 | 1.56E-02 |
| <b>CNST</b>     | b.t. | n.s. | -1.76 | 3.00E-03 |
| <b>TAF13</b>    | b.t. | n.s. | -1.76 | 2.12E-02 |
| <b>MAD1L1</b>   | b.t. | n.s. | -1.77 | 3.96E-02 |
| <b>ACSS1</b>    | b.t. | n.s. | -1.78 | 3.86E-02 |
| <b>BRD9</b>     | b.t. | n.s. | -1.81 | 2.06E-02 |

|                 |      |      |       |          |
|-----------------|------|------|-------|----------|
| <b>ING5</b>     | b.t. | n.s. | -1.82 | 1.21E-02 |
| <b>CRACR2A</b>  | b.t. | n.s. | -1.84 | 4.09E-02 |
| <b>MECP2</b>    | b.t. | n.s. | -1.84 | 1.99E-02 |
| <b>BRD1</b>     | b.t. | n.s. | -1.85 | 1.17E-02 |
| <b>ZNF776</b>   | b.t. | n.s. | -1.85 | 2.25E-02 |
| <b>CNNM4</b>    | b.t. | n.s. | -1.88 | 3.81E-02 |
| <b>ZNF565</b>   | b.t. | n.s. | -1.88 | 2.07E-02 |
| <b>TOP1MT</b>   | b.t. | n.s. | -1.9  | 4.55E-02 |
| <b>PPIE</b>     | b.t. | n.s. | -1.93 | 3.45E-02 |
| <b>VPS11</b>    | b.t. | n.s. | -1.93 | 1.80E-02 |
| <b>NRF1</b>     | b.t. | n.s. | -2.01 | 1.94E-02 |
| <b>ADRB2</b>    | b.t. | n.s. | -2.02 | 8.00E-03 |
| <b>QPCTL</b>    | b.t. | n.s. | -2.05 | 4.63E-02 |
| <b>CRAMP1</b>   | b.t. | n.s. | -2.11 | 3.80E-03 |
| <b>SLC25A30</b> | b.t. | n.s. | -2.11 | 2.06E-02 |
| <b>ZNF131</b>   | b.t. | n.s. | -2.15 | 2.20E-03 |
| <b>KDM4B</b>    | b.t. | n.s. | -2.17 | 2.00E-04 |
| <b>C5orf56</b>  | b.t. | n.s. | -2.18 | 1.26E-02 |
| <b>CYFIP2</b>   | b.t. | n.s. | -2.18 | 4.43E-02 |
| <b>NDEL1</b>    | b.t. | n.s. | -2.2  | 1.38E-02 |
| <b>MLXIP</b>    | b.t. | n.s. | -2.22 | 9.00E-04 |
| <b>GFOD1</b>    | b.t. | n.s. | -2.22 | 1.56E-02 |
| <b>ITIH4</b>    | b.t. | n.s. | -2.22 | 4.48E-02 |
| <b>SLC25A26</b> | b.t. | n.s. | -2.33 | 2.76E-02 |
| <b>ARHGAP9</b>  | b.t. | n.s. | -2.34 | 3.46E-02 |
| <b>ZNF613</b>   | b.t. | n.s. | -2.37 | 1.51E-02 |
| <b>MADD</b>     | b.t. | n.s. | -2.39 | 2.10E-03 |
| <b>SYCP3</b>    | b.t. | n.s. | -2.41 | 1.08E-02 |
| <b>C19orf66</b> | b.t. | n.s. | -2.47 | 3.96E-02 |

|           |      |      |        |          |
|-----------|------|------|--------|----------|
| NF1       | b.t. | n.s. | -2.48  | 1.67E-02 |
| PLEKHA7   | b.t. | n.s. | -2.51  | 1.73E-02 |
| INPP5A    | b.t. | n.s. | -2.56  | 4.98E-02 |
| ZNF331    | b.t. | n.s. | -2.58  | 2.72E-02 |
| BANP      | b.t. | n.s. | -2.62  | 1.58E-02 |
| ZZEF1     | b.t. | n.s. | -2.88  | 4.62E-02 |
| PLEKHA2   | b.t. | n.s. | -2.97  | 3.49E-02 |
| OSBPL3    | b.t. | n.s. | -2.98  | 7.90E-03 |
| SAT1      | b.t. | n.s. | -3.05  | 4.85E-02 |
| PELI1     | b.t. | n.s. | -3.09  | 1.75E-02 |
| HIST1H4A  | b.t. | n.s. | -3.17  | 1.78E-02 |
| PACSIN2   | b.t. | n.s. | -3.22  | 2.30E-02 |
| NFATC1    | b.t. | n.s. | -3.29  | 4.87E-02 |
| SGK3      | b.t. | n.s. | -3.48  | 1.00E-04 |
| IL18R1    | b.t. | n.s. | -3.5   | 2.61E-02 |
| LAX1      | b.t. | n.s. | -4.15  | 2.76E-02 |
| HIST1H2BI | b.t. | n.s. | -4.23  | 1.12E-02 |
| APBB2     | b.t. | n.s. | -5.31  | 3.33E-02 |
| LY9       | b.t. | n.s. | -7.82  | 1.17E-02 |
| P2RX5     | b.t. | n.s. | -8.83  | 3.68E-02 |
| TBC1D9    | b.t. | n.s. | -10.95 | 1.13E-02 |

| WT (Barcelona) | Fold Change (CvsA) | P-val (CvsA) | Fold Change (DvsB) | P-val (DvsB) |
|----------------|--------------------|--------------|--------------------|--------------|
| CYBRD1         | 111.12             | 4.22E-06     | 26.75              | 2.00E-04     |
| GPR160         | 56.5               | 7.30E-03     | 17.29              | 3.05E-02     |
| MGLL           | 43.95              | 5.40E-03     | 13.54              | 9.30E-03     |
| BATF           | 40.95              | 4.00E-04     | 28.68              | 9.00E-04     |
| BATF3          | 40.79              | 9.00E-04     | 37.47              | 1.80E-03     |
| TNFRSF9        | 38.59              | 1.82E-02     | b.t.               | n.s.         |

|         |       |          |       |          |
|---------|-------|----------|-------|----------|
| STAT3   | 34.99 | 5.79E-07 | 23.05 | 7.47E-06 |
| P2RX7   | 32.12 | 3.04E-02 | b.t.  | n.s.     |
| SLC43A3 | 29.57 | 3.20E-03 | 6.14  | 1.98E-02 |
| SESN2   | 28.39 | 3.90E-03 | b.t.  | n.s.     |
| DGKG    | 24.85 | 1.10E-03 | 63.47 | 9.36E-05 |
| BASP1   | 23.64 | 2.20E-03 | 7.23  | 4.20E-03 |
| BCAR3   | 21.96 | 8.50E-03 | b.t.  | n.s.     |
| C4orf46 | 21.68 | 1.60E-03 | 11.17 | 1.30E-03 |
| TNFAIP3 | 20.43 | 6.57E-05 | 10.91 | 3.30E-05 |
| TRAF1   | 19.75 | 5.00E-04 | 26.03 | 4.00E-04 |
| BID     | 19.33 | 1.70E-03 | 4.8   | 2.92E-02 |
| ELL2    | 18.89 | 4.60E-05 | 18.36 | 1.22E-05 |
| NAMPT   | 18.62 | 2.21E-02 | b.t.  | n.s.     |
| ATF3    | 17.45 | 3.30E-02 | 12.58 | 3.80E-03 |
| SLC7A5  | 17.09 | 4.30E-03 | b.t.  | n.s.     |
| NCF2    | 16    | 2.30E-03 | 6.91  | 9.10E-03 |
| PLGRKT  | 15.77 | 9.59E-05 | 5.43  | 9.00E-04 |
| MYO1G   | 15.15 | 9.00E-04 | 7.49  | 1.35E-02 |
| GPR183  | 13.78 | 2.29E-02 | 18.45 | 2.21E-02 |
| SLAMF1  | 13.09 | 3.71E-02 | b.t.  | n.s.     |
| IL2RB   | 12.67 | 7.24E-05 | 5.29  | 4.90E-03 |
| GPR132  | 12.35 | 5.00E-04 | 16.94 | 8.83E-05 |
| LDHA    | 11.69 | 1.44E-02 | b.t.  | n.s.     |
| RAB29   | 11.01 | 1.10E-03 | 6.99  | 7.00E-03 |
| TUBB    | 10.85 | 2.00E-04 | b.t.  | n.s.     |
| C1QBP   | 10.68 | 1.64E-02 | b.t.  | n.s.     |
| EZH2    | 10.63 | 2.20E-03 | 28.25 | 2.00E-04 |
| HUWE1   | 10.54 | 1.30E-03 | 6     | 3.40E-03 |
| RANBP1  | 10.09 | 4.61E-02 | b.t.  | n.s.     |

|          |      |          |       |          |
|----------|------|----------|-------|----------|
| WARS     | 9.98 | 3.00E-04 | 3.53  | 4.99E-02 |
| PSMB5    | 9.7  | 5.30E-03 | 4.35  | 4.40E-02 |
| CHRNA6   | 9.68 | 1.90E-03 | 18.83 | 2.00E-04 |
| MREG     | 9.62 | 2.78E-02 | 8.19  | 2.27E-02 |
| PRMT1    | 9.56 | 2.55E-02 | b.t.  | n.s.     |
| SLC1A5   | 9.51 | 1.02E-02 | b.t.  | n.s.     |
| RHOF     | 9.43 | 2.00E-04 | 6.06  | 8.00E-04 |
| PKM      | 9.28 | 4.00E-04 | 4.38  | 9.70E-03 |
| NFKBIA   | 9.2  | 1.00E-03 | 8.5   | 2.91E-05 |
| VDAC1    | 8.95 | 1.35E-02 | b.t.  | n.s.     |
| TMEM97   | 8.92 | 5.40E-03 | b.t.  | n.s.     |
| GRAMD1B  | 8.88 | 2.84E-02 | 19.96 | 9.30E-03 |
| BOLA3    | 8.85 | 1.08E-02 | b.t.  | n.s.     |
| SARS     | 8.72 | 1.19E-02 | b.t.  | n.s.     |
| CCND2    | 8.64 | 1.20E-03 | 5.34  | 8.20E-03 |
| BCAT1    | 8.5  | 1.70E-03 | 6.93  | 1.51E-02 |
| IFNGR1   | 8.45 | 1.40E-03 | 4.7   | 4.10E-03 |
| COX17    | 8.35 | 8.40E-03 | 3.22  | 2.99E-02 |
| RASSF2   | 8.28 | 3.30E-03 | 3.34  | 2.77E-02 |
| FASN     | 8.26 | 8.70E-03 | b.t.  | n.s.     |
| PTPN1    | 8.2  | 2.36E-06 | 5.6   | 1.21E-05 |
| NFE2L1   | 8.16 | 2.00E-04 | 2.2   | 3.42E-02 |
| SERPINB9 | 8.06 | 4.41E-02 | b.t.  | n.s.     |
| SNX11    | 7.98 | 1.61E-02 | 3.17  | 1.52E-02 |
| PHB      | 7.89 | 9.70E-03 | b.t.  | n.s.     |
| GOT1     | 7.86 | 7.00E-03 | b.t.  | n.s.     |
| POLR3H   | 7.81 | 2.61E-02 | b.t.  | n.s.     |
| PSMB2    | 7.8  | 1.24E-02 | 3.44  | 2.44E-02 |
| PSMC5    | 7.8  | 1.23E-02 | b.t.  | n.s.     |

|          |      |          |       |          |
|----------|------|----------|-------|----------|
| LILRB4   | 7.71 | 6.00E-03 | b.t.  | n.s.     |
| MTX1     | 7.66 | 5.90E-03 | 3.09  | 4.02E-02 |
| MRPL24   | 7.64 | 7.10E-03 | b.t.  | n.s.     |
| CD80     | 7.61 | 4.73E-02 | 11.17 | 7.80E-03 |
| RPL26L1  | 7.6  | 1.52E-02 | b.t.  | n.s.     |
| LCP1     | 7.53 | 6.00E-04 | 3.52  | 1.86E-02 |
| ARPC5L   | 7.5  | 1.23E-02 | b.t.  | n.s.     |
| EIF4EBP1 | 7.5  | 3.94E-02 | b.t.  | n.s.     |
| COX5A    | 7.48 | 1.77E-02 | b.t.  | n.s.     |
| PCK2     | 7.47 | 2.83E-02 | b.t.  | n.s.     |
| DCPS     | 7.36 | 3.70E-03 | b.t.  | n.s.     |
| COLCA2   | 7.17 | 1.20E-03 | 5.52  | 1.28E-02 |
| ZNF460   | 7.16 | 1.00E-04 | 6.89  | 4.60E-05 |
| LY96     | 7    | 3.70E-03 | 4.12  | 2.95E-02 |
| PRDX1    | 7    | 9.00E-04 | 2.91  | 2.46E-02 |
| PSMA1    | 6.83 | 4.80E-03 | b.t.  | n.s.     |
| CCT3     | 6.81 | 2.19E-02 | b.t.  | n.s.     |
| ARHGAP31 | 6.8  | 4.40E-03 | 6.4   | 1.40E-03 |
| LRP8     | 6.79 | 4.20E-03 | b.t.  | n.s.     |
| MRPL23   | 6.7  | 9.60E-03 | b.t.  | n.s.     |
| PSMB10   | 6.69 | 3.09E-02 | b.t.  | n.s.     |
| KSR1     | 6.65 | 5.60E-03 | 4.47  | 9.60E-03 |
| PSMD3    | 6.58 | 3.50E-03 | b.t.  | n.s.     |
| POLD2    | 6.57 | 3.30E-03 | 2.28  | 4.21E-02 |
| NDUFA11  | 6.54 | 1.05E-02 | b.t.  | n.s.     |
| SFT2D1   | 6.53 | 3.20E-03 | 5.05  | 1.32E-02 |
| FLVCR2   | 6.52 | 1.00E-04 | 8.53  | 7.84E-05 |
| GPR157   | 6.52 | 5.20E-03 | b.t.  | n.s.     |
| PSMA6    | 6.52 | 3.90E-03 | 2.89  | 2.64E-02 |

|                |      |          |       |          |
|----------------|------|----------|-------|----------|
| <b>MPC1</b>    | 6.45 | 2.08E-02 | b.t.  | n.s.     |
| <b>PSMA3</b>   | 6.39 | 9.30E-03 | 2.45  | 4.06E-02 |
| <b>SLC6A9</b>  | 6.38 | 2.59E-02 | b.t.  | n.s.     |
| <b>PSMC3</b>   | 6.37 | 1.42E-02 | 3.19  | 3.91E-02 |
| <b>ANAPC11</b> | 6.36 | 8.00E-04 | b.t.  | n.s.     |
| <b>LAT2</b>    | 6.29 | 5.70E-03 | b.t.  | n.s.     |
| <b>CPNE5</b>   | 6.25 | 2.80E-03 | 5.97  | 2.00E-03 |
| <b>JMY</b>     | 6.23 | 1.80E-03 | 11.82 | 6.00E-04 |
| <b>TUBA1C</b>  | 6.22 | 2.10E-03 | b.t.  | n.s.     |
| <b>DBI</b>     | 6.19 | 1.00E-04 | 1.93  | 4.19E-02 |
| <b>ABTB2</b>   | 6.18 | 1.27E-02 | b.t.  | n.s.     |
| <b>ENO1</b>    | 6.14 | 1.62E-02 | b.t.  | n.s.     |
| <b>SLIRP</b>   | 6.1  | 4.95E-02 | b.t.  | n.s.     |
| <b>SLC2A5</b>  | 6.07 | 2.00E-04 | 3.81  | 8.00E-04 |
| <b>COX7B</b>   | 5.92 | 1.67E-02 | b.t.  | n.s.     |
| <b>PHPT1</b>   | 5.85 | 6.40E-03 | b.t.  | n.s.     |
| <b>NAA38</b>   | 5.81 | 3.70E-03 | b.t.  | n.s.     |
| <b>SEC61G</b>  | 5.8  | 6.20E-03 | b.t.  | n.s.     |
| <b>PABPC4</b>  | 5.77 | 2.68E-02 | b.t.  | n.s.     |
| <b>SLC2A13</b> | 5.71 | 4.00E-04 | 4.4   | 2.30E-03 |
| <b>PIK3C2B</b> | 5.67 | 4.60E-03 | b.t.  | n.s.     |
| <b>LARS</b>    | 5.63 | 1.58E-02 | 2.33  | 2.08E-02 |
| <b>SOD2</b>    | 5.62 | 4.32E-02 | b.t.  | n.s.     |
| <b>JAK3</b>    | 5.55 | 4.97E-05 | 4.08  | 4.30E-03 |
| <b>CSF2RB</b>  | 5.54 | 1.00E-03 | 3.89  | 2.44E-02 |
| <b>KLHL6</b>   | 5.54 | 6.00E-04 | 2.56  | 4.42E-02 |
| <b>POLR2I</b>  | 5.52 | 2.00E-03 | b.t.  | n.s.     |
| <b>PRELID1</b> | 5.51 | 1.47E-02 | b.t.  | n.s.     |
| <b>DDIT4</b>   | 5.43 | 1.70E-03 | 3.38  | 4.09E-02 |

|          |      |          |      |          |
|----------|------|----------|------|----------|
| RCN1     | 5.42 | 2.70E-02 | b.t. | n.s.     |
| TFRC     | 5.42 | 2.00E-03 | 7.74 | 6.00E-04 |
| XPOT     | 5.4  | 3.21E-02 | b.t. | n.s.     |
| RASSF4   | 5.39 | 1.34E-02 | 4.76 | 2.40E-03 |
| BCL6     | 5.3  | 1.30E-03 | 7.31 | 5.00E-04 |
| TBC1D9B  | 5.3  | 1.52E-02 | b.t. | n.s.     |
| ST8SIA4  | 5.28 | 2.71E-02 | 9.01 | 5.00E-04 |
| CBX6     | 5.24 | 2.28E-02 | 4.2  | 2.48E-02 |
| PPIF     | 5.23 | 3.20E-03 | b.t. | n.s.     |
| ZDHHC18  | 5.22 | 3.00E-04 | 3.2  | 4.80E-03 |
| MRPS15   | 5.07 | 4.20E-03 | b.t. | n.s.     |
| CD274    | 5.06 | 2.45E-02 | b.t. | n.s.     |
| AIMP2    | 5.05 | 3.51E-02 | b.t. | n.s.     |
| CHAC1    | 5.02 | 8.70E-03 | b.t. | n.s.     |
| HSD17B10 | 5    | 7.00E-03 | b.t. | n.s.     |
| PSMD11   | 5    | 1.08E-02 | 3.66 | 3.05E-02 |
| AKR1A1   | 4.97 | 2.50E-03 | b.t. | n.s.     |
| MRPL47   | 4.97 | 2.08E-02 | b.t. | n.s.     |
| HCCS     | 4.91 | 2.88E-02 | b.t. | n.s.     |
| MTHFD2   | 4.91 | 3.40E-03 | 2.95 | 1.05E-02 |
| SLC7A1   | 4.9  | 2.50E-03 | b.t. | n.s.     |
| EPRS     | 4.88 | 1.39E-02 | b.t. | n.s.     |
| ZSCAN2   | 4.86 | 2.78E-02 | b.t. | n.s.     |
| CALR     | 4.81 | 2.00E-04 | b.t. | n.s.     |
| PTGER4   | 4.81 | 3.80E-03 | b.t. | n.s.     |
| AGMAT    | 4.8  | 1.53E-02 | b.t. | n.s.     |
| PSMA7    | 4.79 | 2.00E-03 | 2.57 | 2.75E-02 |
| HELLS    | 4.76 | 8.84E-05 | 5.68 | 6.72E-06 |
| MRPS28   | 4.76 | 4.31E-02 | b.t. | n.s.     |

|         |      |          |      |          |
|---------|------|----------|------|----------|
| RUVBL1  | 4.76 | 4.04E-02 | b.t. | n.s.     |
| PSMC1   | 4.73 | 1.33E-02 | b.t. | n.s.     |
| CDKN1A  | 4.72 | 1.59E-02 | 3.18 | 4.17E-02 |
| BLVRA   | 4.69 | 7.37E-08 | 2.92 | 7.67E-05 |
| PDGFA   | 4.69 | 1.62E-02 | b.t. | n.s.     |
| CTH     | 4.64 | 4.60E-03 | 6.36 | 6.20E-03 |
| RFC2    | 4.63 | 3.10E-03 | 3.24 | 5.30E-03 |
| SEC11C  | 4.6  | 9.24E-06 | 3.09 | 5.00E-04 |
| POMP    | 4.58 | 2.71E-02 | b.t. | n.s.     |
| TUBA1A  | 4.57 | 7.70E-03 | b.t. | n.s.     |
| TUBA1B  | 4.5  | 4.30E-03 | b.t. | n.s.     |
| TSPAN5  | 4.49 | 1.70E-03 | 3.68 | 1.30E-03 |
| RFTN1   | 4.48 | 1.56E-02 | 5.6  | 1.42E-02 |
| ELL3    | 4.43 | 6.90E-03 | 3.78 | 6.90E-03 |
| PSMC2   | 4.43 | 1.05E-02 | 3.28 | 2.34E-02 |
| POU2AF1 | 4.42 | 6.20E-03 | 2.68 | 4.42E-02 |
| PARP1   | 4.41 | 1.21E-02 | 2.49 | 4.35E-02 |
| PNP     | 4.4  | 4.90E-03 | b.t. | n.s.     |
| RSL24D1 | 4.37 | 2.37E-02 | 2.91 | 4.74E-02 |
| HSPA9   | 4.35 | 1.10E-02 | b.t. | n.s.     |
| TWISTNB | 4.35 | 4.80E-02 | b.t. | n.s.     |
| ZNF267  | 4.35 | 2.30E-03 | 3.11 | 1.90E-03 |
| MYCN    | 4.33 | 4.32E-02 | b.t. | n.s.     |
| BANF1   | 4.32 | 4.77E-02 | b.t. | n.s.     |
| GARS    | 4.31 | 8.00E-03 | 2.94 | 2.17E-02 |
| CST7    | 4.28 | 2.13E-02 | b.t. | n.s.     |
| CHAF1B  | 4.28 | 1.80E-03 | 2.89 | 8.50E-03 |
| NBEAL2  | 4.28 | 1.40E-03 | 2.93 | 2.49E-02 |
| GHITM   | 4.25 | 1.12E-02 | b.t. | n.s.     |

|          |      |          |      |          |
|----------|------|----------|------|----------|
| ARNTL2   | 4.22 | 4.85E-02 | 6.3  | 3.70E-03 |
| NIT2     | 4.21 | 3.30E-03 | b.t. | n.s.     |
| GTDC1    | 4.2  | 9.60E-03 | 4.03 | 1.40E-03 |
| PDCD5    | 4.2  | 2.12E-02 | b.t. | n.s.     |
| RAD23A   | 4.2  | 7.10E-03 | b.t. | n.s.     |
| TRIP10   | 4.19 | 1.52E-02 | 7.83 | 1.13E-02 |
| CENPW    | 4.18 | 2.77E-02 | b.t. | n.s.     |
| NDUFB9   | 4.18 | 2.60E-03 | 2.87 | 3.20E-02 |
| API5     | 4.17 | 2.76E-02 | b.t. | n.s.     |
| SLC25A23 | 4.15 | 3.20E-03 | b.t. | n.s.     |
| SMARCA2  | 4.15 | 2.08E-02 | 4.14 | 1.62E-02 |
| CYC1     | 4.13 | 4.60E-03 | b.t. | n.s.     |
| CYB5A    | 4.12 | 3.00E-03 | 3.86 | 2.80E-03 |
| BUD31    | 4.11 | 9.40E-03 | 2.6  | 1.44E-02 |
| SNF8     | 4.1  | 1.57E-02 | b.t. | n.s.     |
| MRPL40   | 4.09 | 7.30E-03 | 3.26 | 4.03E-02 |
| NDUFB7   | 4.09 | 1.81E-02 | b.t. | n.s.     |
| F5       | 4.08 | 1.30E-03 | b.t. | n.s.     |
| SRA1     | 4.08 | 1.65E-02 | b.t. | n.s.     |
| SSRP1    | 4.08 | 1.26E-02 | b.t. | n.s.     |
| PSMD2    | 4.07 | 1.20E-03 | 2.77 | 4.21E-02 |
| SNRPE    | 4.06 | 1.99E-02 | b.t. | n.s.     |
| CCT7     | 4.05 | 3.87E-02 | b.t. | n.s.     |
| PSMA4    | 4.05 | 4.78E-02 | b.t. | n.s.     |
| IRF4     | 4.04 | 2.50E-03 | b.t. | n.s.     |
| SLC25A19 | 4.04 | 3.30E-03 | b.t. | n.s.     |
| PARK7    | 4.03 | 8.00E-04 | 2.93 | 1.15E-02 |
| PSMD14   | 4.03 | 1.02E-02 | b.t. | n.s.     |
| RAB13    | 4.02 | 7.10E-03 | 4.9  | 1.60E-03 |

|         |      |          |       |          |
|---------|------|----------|-------|----------|
| ARSG    | 4.01 | 1.85E-02 | b.t.  | n.s.     |
| CHCHD2  | 4    | 6.50E-03 | b.t.  | n.s.     |
| IARS    | 3.98 | 7.30E-03 | b.t.  | n.s.     |
| MRPL11  | 3.98 | 2.31E-02 | b.t.  | n.s.     |
| PSMA5   | 3.97 | 1.11E-02 | 2.85  | 1.46E-02 |
| SRI     | 3.96 | 4.70E-03 | b.t.  | n.s.     |
| AICDA   | 3.9  | 4.40E-02 | b.t.  | n.s.     |
| JUN     | 3.9  | 1.50E-03 | 4.96  | 4.00E-04 |
| EIF3I   | 3.89 | 2.70E-02 | b.t.  | n.s.     |
| LILRB1  | 3.89 | 1.00E-03 | 3.93  | 4.00E-03 |
| ABCD2   | 3.87 | 4.94E-05 | 12.77 | 9.10E-03 |
| TNFSF4  | 3.87 | 1.15E-02 | 10.29 | 7.00E-03 |
| HTRA2   | 3.85 | 1.12E-06 | 3.34  | 5.51E-05 |
| TOMM22  | 3.84 | 2.89E-02 | b.t.  | n.s.     |
| EXOSC1  | 3.81 | 2.80E-03 | b.t.  | n.s.     |
| MRPS7   | 3.81 | 4.47E-02 | b.t.  | n.s.     |
| PPP1R9B | 3.81 | 1.90E-03 | 3.06  | 8.50E-03 |
| ZDHHC16 | 3.8  | 2.30E-03 | b.t.  | n.s.     |
| HMBS    | 3.78 | 2.08E-02 | 1.95  | 1.80E-03 |
| CNTNAP1 | 3.77 | 3.58E-02 | b.t.  | n.s.     |
| NDUFAB1 | 3.77 | 4.09E-02 | b.t.  | n.s.     |
| RPS19   | 3.77 | 2.30E-03 | 1.82  | 2.44E-02 |
| ICAM1   | 3.75 | 6.60E-03 | 3.7   | 3.30E-03 |
| C5AR1   | 3.74 | 2.00E-04 | 3.08  | 4.00E-04 |
| CCDC6   | 3.74 | 3.00E-04 | 2.93  | 7.00E-04 |
| ROMO1   | 3.74 | 1.08E-02 | b.t.  | n.s.     |
| RPLP0   | 3.74 | 2.90E-03 | 2.02  | 2.38E-02 |
| AGPAT3  | 3.71 | 5.00E-03 | 1.97  | 8.30E-03 |
| PSMD4   | 3.71 | 3.62E-02 | b.t.  | n.s.     |

|        |      |          |      |          |
|--------|------|----------|------|----------|
| STOML2 | 3.71 | 9.80E-03 | b.t. | n.s.     |
| BLVRB  | 3.7  | 6.50E-03 | b.t. | n.s.     |
| COX8A  | 3.7  | 1.60E-02 | b.t. | n.s.     |
| RAB9A  | 3.69 | 1.71E-02 | 2.92 | 2.80E-03 |
| PSMB1  | 3.68 | 1.77E-02 | b.t. | n.s.     |
| MRPL13 | 3.67 | 4.05E-02 | b.t. | n.s.     |
| CARM1  | 3.66 | 8.00E-04 | 3.05 | 4.90E-03 |
| H2AFZ  | 3.66 | 1.09E-02 | b.t. | n.s.     |
| TXN    | 3.66 | 2.00E-04 | b.t. | n.s.     |
| NAGA   | 3.65 | 6.50E-03 | b.t. | n.s.     |
| PSMB4  | 3.65 | 1.30E-03 | 2.33 | 2.13E-02 |
| SQLE   | 3.64 | 1.58E-02 | b.t. | n.s.     |
| SLC3A2 | 3.63 | 3.51E-02 | b.t. | n.s.     |
| LYPLA2 | 3.6  | 1.81E-02 | b.t. | n.s.     |
| PCCB   | 3.6  | 1.17E-02 | b.t. | n.s.     |
| PSMD8  | 3.59 | 2.77E-02 | b.t. | n.s.     |
| COX6A1 | 3.58 | 2.03E-02 | b.t. | n.s.     |
| POLR2K | 3.57 | 4.71E-02 | 2.28 | 3.44E-02 |
| MTCH2  | 3.55 | 5.70E-03 | b.t. | n.s.     |
| STAT5B | 3.55 | 4.61E-05 | 3.66 | 7.95E-05 |
| ERAL1  | 3.54 | 5.50E-03 | b.t. | n.s.     |
| EIF2S2 | 3.52 | 1.52E-02 | b.t. | n.s.     |
| PLBD2  | 3.52 | 4.80E-03 | b.t. | n.s.     |
| G6PC3  | 3.51 | 4.44E-02 | b.t. | n.s.     |
| PDIA6  | 3.51 | 2.23E-02 | b.t. | n.s.     |
| PPP5C  | 3.5  | 1.80E-03 | 2.4  | 2.03E-02 |
| AARS   | 3.49 | 1.50E-03 | b.t. | n.s.     |
| NDUFS5 | 3.49 | 9.00E-04 | 1.82 | 4.17E-02 |
| FERMT3 | 3.48 | 2.50E-03 | b.t. | n.s.     |

|         |      |          |      |          |
|---------|------|----------|------|----------|
| LRRC42  | 3.47 | 8.00E-04 | b.t. | n.s.     |
| MRPS18C | 3.47 | 2.62E-02 | 2.57 | 2.57E-02 |
| STPG1   | 3.46 | 1.00E-03 | 4.37 | 4.00E-04 |
| PSMB7   | 3.45 | 1.20E-02 | b.t. | n.s.     |
| MIF     | 3.44 | 3.01E-02 | b.t. | n.s.     |
| TMEM205 | 3.44 | 1.00E-04 | 2.18 | 1.68E-02 |
| CCDC124 | 3.43 | 2.44E-02 | b.t. | n.s.     |
| PFN1    | 3.43 | 1.60E-03 | b.t. | n.s.     |
| ACTG1   | 3.42 | 1.09E-02 | b.t. | n.s.     |
| ASNA1   | 3.42 | 5.70E-03 | b.t. | n.s.     |
| CFLAR   | 3.42 | 1.00E-03 | 4.24 | 1.00E-04 |
| HMSD    | 3.42 | 1.88E-02 | 4.81 | 1.21E-02 |
| MRPL46  | 3.42 | 3.44E-02 | b.t. | n.s.     |
| ATF4    | 3.41 | 2.94E-02 | b.t. | n.s.     |
| LACTB   | 3.41 | 1.29E-02 | 3.74 | 2.90E-03 |
| NACC1   | 3.41 | 1.08E-02 | b.t. | n.s.     |
| SLC20A1 | 3.41 | 6.00E-04 | 2.7  | 5.00E-04 |
| ERH     | 3.4  | 4.00E-04 | 2.68 | 9.00E-04 |
| TXNL4A  | 3.39 | 4.64E-02 | b.t. | n.s.     |
| ACOT13  | 3.38 | 1.20E-03 | 1.82 | 1.49E-02 |
| ANXA2   | 3.38 | 4.80E-03 | b.t. | n.s.     |
| HSPA5   | 3.38 | 2.63E-02 | b.t. | n.s.     |
| NTHL1   | 3.38 | 4.02E-02 | b.t. | n.s.     |
| PSMB3   | 3.38 | 6.90E-03 | 2.81 | 3.85E-02 |
| TAGLN2  | 3.38 | 1.90E-03 | 5.98 | 1.00E-04 |
| EFTUD2  | 3.37 | 5.90E-03 | b.t. | n.s.     |
| NUP155  | 3.37 | 3.49E-02 | b.t. | n.s.     |
| RFX5    | 3.35 | 1.10E-03 | 2.25 | 3.60E-03 |
| DSTN    | 3.34 | 4.60E-03 | 4.6  | 5.00E-04 |

|         |      |          |      |          |
|---------|------|----------|------|----------|
| ZNRF1   | 3.34 | 1.86E-02 | b.t. | n.s.     |
| ARPC4   | 3.33 | 8.30E-03 | b.t. | n.s.     |
| IDH2    | 3.33 | 3.50E-03 | b.t. | n.s.     |
| QDPR    | 3.33 | 2.77E-02 | b.t. | n.s.     |
| XBP1    | 3.33 | 4.00E-04 | 2.31 | 1.89E-02 |
| CLIP1   | 3.32 | 8.60E-03 | 3.37 | 2.18E-02 |
| NRAS    | 3.32 | 1.10E-03 | 2.07 | 1.24E-02 |
| SNRPB   | 3.32 | 3.28E-02 | b.t. | n.s.     |
| FSD1L   | 3.31 | 4.86E-02 | 2.83 | 2.29E-02 |
| COX7A2  | 3.3  | 3.15E-02 | b.t. | n.s.     |
| NME3    | 3.3  | 1.90E-03 | b.t. | n.s.     |
| PSMD7   | 3.29 | 4.20E-03 | b.t. | n.s.     |
| TP53BP2 | 3.29 | 2.40E-03 | 3.11 | 7.00E-04 |
| GNA12   | 3.28 | 1.00E-03 | 3.08 | 2.00E-04 |
| ADRM1   | 3.27 | 1.60E-02 | b.t. | n.s.     |
| SNRPD3  | 3.27 | 2.25E-02 | b.t. | n.s.     |
| NDUFB3  | 3.26 | 2.83E-02 | b.t. | n.s.     |
| HAX1    | 3.26 | 2.06E-02 | b.t. | n.s.     |
| APEX1   | 3.25 | 3.13E-02 | b.t. | n.s.     |
| KCNN4   | 3.25 | 7.80E-03 | b.t. | n.s.     |
| LAMTOR2 | 3.25 | 1.35E-02 | b.t. | n.s.     |
| ARHGDI2 | 3.24 | 2.92E-02 | b.t. | n.s.     |
| ACBD6   | 3.23 | 1.08E-02 | b.t. | n.s.     |
| COX6B1  | 3.23 | 8.90E-03 | b.t. | n.s.     |
| TMED2   | 3.23 | 3.19E-02 | b.t. | n.s.     |
| ACTN4   | 3.21 | 2.40E-02 | b.t. | n.s.     |
| MCL1    | 3.21 | 2.70E-03 | 2.92 | 4.60E-03 |
| MRPL1   | 3.2  | 3.58E-02 | b.t. | n.s.     |
| GSTP1   | 3.17 | 4.70E-03 | 2.55 | 3.68E-02 |

|          |      |          |      |          |
|----------|------|----------|------|----------|
| NFKB2    | 3.17 | 1.41E-02 | 3.43 | 3.20E-03 |
| PSMD1    | 3.17 | 1.34E-02 | b.t. | n.s.     |
| CRELD2   | 3.16 | 8.20E-03 | b.t. | n.s.     |
| MANF     | 3.16 | 1.01E-02 | b.t. | n.s.     |
| PSME1    | 3.16 | 1.90E-02 | 2.82 | 3.69E-02 |
| UQCRQ    | 3.16 | 2.23E-02 | b.t. | n.s.     |
| NDUFAF3  | 3.15 | 4.50E-02 | b.t. | n.s.     |
| TMEM208  | 3.15 | 4.12E-02 | b.t. | n.s.     |
| TMEM63B  | 3.15 | 1.94E-02 | 2.82 | 3.12E-02 |
| LDHB     | 3.14 | 3.72E-02 | b.t. | n.s.     |
| CXCR5    | 3.13 | 2.89E-02 | 4.37 | 8.30E-03 |
| TNIP2    | 3.13 | 1.20E-03 | 1.9  | 1.90E-02 |
| DPYSL2   | 3.11 | 3.87E-02 | b.t. | n.s.     |
| GLRX3    | 3.1  | 2.90E-03 | b.t. | n.s.     |
| GOT2     | 3.1  | 1.70E-03 | 2.8  | 3.40E-03 |
| SUB1     | 3.1  | 4.58E-02 | b.t. | n.s.     |
| SUMO3    | 3.1  | 1.40E-02 | b.t. | n.s.     |
| TFDP1    | 3.1  | 4.96E-02 | b.t. | n.s.     |
| ZNF442   | 3.1  | 4.00E-04 | 1.54 | 8.60E-03 |
| CLPP     | 3.09 | 1.50E-03 | b.t. | n.s.     |
| HTT      | 3.09 | 1.24E-02 | b.t. | n.s.     |
| EIF2S1   | 3.08 | 3.68E-02 | b.t. | n.s.     |
| MAPKAP1  | 3.08 | 6.20E-03 | b.t. | n.s.     |
| MFSD10   | 3.08 | 6.00E-04 | b.t. | n.s.     |
| NUDT5    | 3.08 | 4.63E-02 | b.t. | n.s.     |
| OXCT1    | 3.08 | 2.20E-03 | b.t. | n.s.     |
| SLC25A43 | 3.07 | 7.61E-05 | 2.15 | 2.47E-02 |
| IER5     | 3.06 | 2.30E-03 | 1.64 | 4.31E-02 |
| GPS1     | 3.06 | 4.30E-03 | b.t. | n.s.     |

|         |      |          |      |          |
|---------|------|----------|------|----------|
| HIGD1A  | 3.06 | 3.45E-02 | b.t. | n.s.     |
| NHP2    | 3.06 | 4.20E-02 | b.t. | n.s.     |
| PPP1R7  | 3.06 | 3.70E-03 | 2.23 | 3.60E-02 |
| OGFOD3  | 3.05 | 3.90E-02 | b.t. | n.s.     |
| TRAPPC1 | 3.05 | 3.93E-02 | b.t. | n.s.     |
| EIF4H   | 3.04 | 9.50E-03 | b.t. | n.s.     |
| COX6C   | 3.02 | 1.80E-03 | b.t. | n.s.     |
| LSM3    | 3.02 | 9.20E-03 | 2.51 | 3.44E-02 |
| SLCO5A1 | 3.02 | 4.20E-03 | 4.26 | 1.00E-04 |
| TUBG1   | 3.02 | 9.30E-03 | b.t. | n.s.     |
| FDPS    | 3.01 | 6.60E-03 | b.t. | n.s.     |
| COA3    | 3    | 4.00E-02 | b.t. | n.s.     |
| GTF3C6  | 3    | 4.82E-02 | b.t. | n.s.     |
| JADE3   | 3    | 8.50E-03 | 3.76 | 8.50E-03 |
| TOX2    | 3    | 7.70E-03 | b.t. | n.s.     |
| YARS    | 3    | 2.46E-02 | b.t. | n.s.     |
| YARS2   | 3    | 4.52E-02 | b.t. | n.s.     |
| CTSA    | 2.99 | 2.35E-02 | b.t. | n.s.     |
| MTHFD1  | 2.99 | 3.00E-04 | 2.49 | 1.20E-03 |
| ORMDL2  | 2.99 | 2.27E-02 | b.t. | n.s.     |
| CCDC167 | 2.98 | 5.80E-03 | 2.63 | 4.50E-03 |
| IMPDH2  | 2.98 | 2.90E-03 | b.t. | n.s.     |
| INTS9   | 2.98 | 5.60E-03 | 2.27 | 7.00E-03 |
| MDH2    | 2.98 | 4.31E-02 | b.t. | n.s.     |
| MRPL22  | 2.98 | 1.38E-02 | b.t. | n.s.     |
| TACO1   | 2.98 | 4.14E-02 | b.t. | n.s.     |
| AIFM2   | 2.97 | 8.00E-03 | b.t. | n.s.     |
| PGK1    | 2.96 | 2.57E-02 | b.t. | n.s.     |
| SLC35F2 | 2.96 | 2.73E-02 | b.t. | n.s.     |

|                 |      |          |      |          |
|-----------------|------|----------|------|----------|
| <b>FURIN</b>    | 2.95 | 9.40E-03 | 1.83 | 2.90E-02 |
| <b>PGAM1</b>    | 2.94 | 1.43E-02 | b.t. | n.s.     |
| <b>POLE2</b>    | 2.94 | 2.29E-02 | 2.16 | 2.93E-02 |
| <b>UBL7</b>     | 2.94 | 1.00E-04 | 3.59 | 3.00E-04 |
| <b>PSMC4</b>    | 2.93 | 8.30E-03 | 3.05 | 1.15E-02 |
| <b>DEGS1</b>    | 2.93 | 6.70E-03 | 2.64 | 1.50E-03 |
| <b>NDUFA2</b>   | 2.93 | 4.03E-02 | b.t. | n.s.     |
| <b>CLIP2</b>    | 2.92 | 1.53E-02 | b.t. | n.s.     |
| <b>NDUFA12</b>  | 2.92 | 1.88E-02 | b.t. | n.s.     |
| <b>CHCHD3</b>   | 2.91 | 3.75E-02 | 2.65 | 3.06E-02 |
| <b>STK38L</b>   | 2.9  | 4.10E-03 | 1.79 | 4.59E-02 |
| <b>ARPC5</b>    | 2.89 | 9.90E-03 | b.t. | n.s.     |
| <b>IKZF1</b>    | 2.89 | 3.11E-02 | 4.5  | 5.10E-03 |
| <b>UBE2L3</b>   | 2.89 | 9.60E-03 | 1.55 | 4.29E-02 |
| <b>RNASEH2A</b> | 2.88 | 1.75E-02 | b.t. | n.s.     |
| <b>SF3B6</b>    | 2.88 | 1.09E-02 | b.t. | n.s.     |
| <b>APOO</b>     | 2.87 | 3.46E-02 | b.t. | n.s.     |
| <b>HMGCR</b>    | 2.87 | 1.29E-02 | b.t. | n.s.     |
| <b>PROSER1</b>  | 2.87 | 1.57E-02 | b.t. | n.s.     |
| <b>UNC119</b>   | 2.87 | 2.18E-02 | b.t. | n.s.     |
| <b>GLRX2</b>    | 2.86 | 2.76E-02 | b.t. | n.s.     |
| <b>NABP2</b>    | 2.86 | 1.10E-03 | b.t. | n.s.     |
| <b>YIF1B</b>    | 2.86 | 2.84E-02 | b.t. | n.s.     |
| <b>ALYREF</b>   | 2.85 | 2.79E-02 | b.t. | n.s.     |
| <b>APRT</b>     | 2.85 | 3.49E-02 | b.t. | n.s.     |
| <b>CSRP1</b>    | 2.85 | 1.43E-02 | b.t. | n.s.     |
| <b>TMPRSS6</b>  | 2.85 | 1.00E-04 | 3.06 | 1.40E-03 |
| <b>MRPS16</b>   | 2.84 | 1.14E-02 | b.t. | n.s.     |
| <b>NPM3</b>     | 2.84 | 4.22E-02 | b.t. | n.s.     |

|          |      |          |      |          |
|----------|------|----------|------|----------|
| COX7A2L  | 2.83 | 2.74E-02 | b.t. | n.s.     |
| KCNC4    | 2.83 | 9.00E-04 | b.t. | n.s.     |
| MAP4     | 2.83 | 2.69E-02 | 2.35 | 4.35E-02 |
| NUP93    | 2.83 | 2.11E-02 | b.t. | n.s.     |
| PCYT2    | 2.83 | 8.60E-03 | b.t. | n.s.     |
| TIFA     | 2.82 | 9.40E-03 | 5.93 | 6.03E-05 |
| IL21R    | 2.82 | 3.80E-03 | 4.08 | 6.00E-04 |
| RPGRIP1L | 2.81 | 2.20E-03 | b.t. | n.s.     |
| GGH      | 2.8  | 3.27E-02 | b.t. | n.s.     |
| MRPL20   | 2.8  | 4.93E-02 | b.t. | n.s.     |
| ELMO1    | 2.79 | 6.70E-03 | 3.38 | 1.71E-02 |
| RASGRP4  | 2.79 | 1.69E-02 | 8.74 | 1.71E-02 |
| DARS     | 2.78 | 6.00E-04 | 2.08 | 6.70E-03 |
| KIF9     | 2.78 | 2.68E-02 | b.t. | n.s.     |
| NDUFA13  | 2.78 | 7.70E-03 | b.t. | n.s.     |
| UBE2N    | 2.78 | 4.69E-02 | b.t. | n.s.     |
| COMMD7   | 2.77 | 5.30E-03 | b.t. | n.s.     |
| NR6A1    | 2.77 | 3.30E-03 | 3.05 | 5.00E-04 |
| NT5C     | 2.77 | 1.00E-04 | 3.03 | 3.30E-03 |
| PPIB     | 2.77 | 7.40E-03 | b.t. | n.s.     |
| TARBP1   | 2.77 | 2.32E-02 | b.t. | n.s.     |
| ADAT2    | 2.76 | 3.48E-02 | b.t. | n.s.     |
| FNBP1    | 2.76 | 8.30E-03 | 2.92 | 1.98E-02 |
| KIF21A   | 2.76 | 1.23E-02 | b.t. | n.s.     |
| STAT5A   | 2.76 | 5.00E-04 | 2.61 | 3.50E-03 |
| COMMD1   | 2.75 | 6.00E-03 | 3.81 | 3.90E-03 |
| CPSF3    | 2.75 | 4.03E-02 | 1.73 | 3.72E-02 |
| HINT2    | 2.75 | 3.04E-02 | b.t. | n.s.     |
| PEA15    | 2.75 | 3.10E-03 | b.t. | n.s.     |

|         |      |          |      |          |
|---------|------|----------|------|----------|
| GRB2    | 2.74 | 3.80E-03 | b.t. | n.s.     |
| PSMB8   | 2.74 | 2.02E-02 | b.t. | n.s.     |
| ASNS    | 2.73 | 2.86E-02 | 2.35 | 2.54E-02 |
| MED20   | 2.71 | 4.57E-02 | b.t. | n.s.     |
| PPID    | 2.71 | 1.00E-03 | 2.3  | 8.00E-04 |
| AP3M2   | 2.7  | 4.13E-02 | b.t. | n.s.     |
| DNAJB11 | 2.7  | 2.50E-02 | b.t. | n.s.     |
| MBD2    | 2.7  | 5.32E-05 | 2.39 | 3.57E-05 |
| MMAB    | 2.7  | 3.15E-02 | b.t. | n.s.     |
| POLDIP2 | 2.7  | 2.30E-03 | b.t. | n.s.     |
| RPS15   | 2.7  | 2.78E-02 | 2.28 | 4.14E-02 |
| SEC61B  | 2.7  | 5.20E-03 | b.t. | n.s.     |
| UQCRH   | 2.7  | 8.70E-03 | b.t. | n.s.     |
| CLTA    | 2.69 | 2.36E-02 | b.t. | n.s.     |
| EIF2B1  | 2.69 | 1.35E-02 | b.t. | n.s.     |
| EIF2D   | 2.69 | 7.70E-03 | 1.89 | 4.88E-02 |
| NDUFA4  | 2.69 | 7.20E-03 | b.t. | n.s.     |
| PRDX3   | 2.69 | 1.69E-02 | b.t. | n.s.     |
| ACOT4   | 2.68 | 7.50E-03 | 2.1  | 2.02E-02 |
| TUBB4B  | 2.68 | 2.12E-02 | b.t. | n.s.     |
| CALM3   | 2.67 | 3.00E-04 | 1.97 | 2.39E-02 |
| CARS    | 2.67 | 1.31E-02 | b.t. | n.s.     |
| IER3IP1 | 2.67 | 1.16E-02 | b.t. | n.s.     |
| NDUFB11 | 2.67 | 1.08E-02 | b.t. | n.s.     |
| OSTC    | 2.67 | 1.39E-02 | b.t. | n.s.     |
| C9orf64 | 2.66 | 5.10E-03 | 1.61 | 1.21E-02 |
| ALG5    | 2.65 | 3.97E-02 | b.t. | n.s.     |
| PFDN4   | 2.65 | 3.50E-02 | 2.99 | 6.30E-03 |
| ARID5A  | 2.64 | 3.40E-03 | 3.76 | 9.00E-04 |

|                |      |          |      |          |
|----------------|------|----------|------|----------|
| <b>CSTF2</b>   | 2.64 | 3.40E-03 | 2.62 | 3.69E-02 |
| <b>NT5DC2</b>  | 2.64 | 2.94E-02 | b.t. | n.s.     |
| <b>PSEKEN</b>  | 2.64 | 9.40E-03 | 1.74 | 1.40E-02 |
| <b>ANAPC16</b> | 2.63 | 2.02E-02 | b.t. | n.s.     |
| <b>LARP1</b>   | 2.63 | 3.66E-02 | b.t. | n.s.     |
| <b>SDF2L1</b>  | 2.63 | 2.07E-02 | b.t. | n.s.     |
| <b>VIM</b>     | 2.63 | 1.13E-02 | 2.33 | 3.38E-02 |
| <b>AP2S1</b>   | 2.62 | 6.70E-03 | b.t. | n.s.     |
| <b>CBS</b>     | 2.62 | 4.21E-02 | b.t. | n.s.     |
| <b>MZT2B</b>   | 2.62 | 2.08E-02 | b.t. | n.s.     |
| <b>RPS9</b>    | 2.62 | 4.61E-02 | b.t. | n.s.     |
| <b>ACLY</b>    | 2.61 | 9.00E-03 | b.t. | n.s.     |
| <b>INTS3</b>   | 2.61 | 3.52E-02 | b.t. | n.s.     |
| <b>CCZ1B</b>   | 2.6  | 8.30E-03 | 1.98 | 1.53E-02 |
| <b>CYB5B</b>   | 2.6  | 1.88E-02 | b.t. | n.s.     |
| <b>MAD2L2</b>  | 2.6  | 1.27E-02 | 1.84 | 2.45E-02 |
| <b>TFEB</b>    | 2.6  | 1.33E-02 | b.t. | n.s.     |
| <b>FKBP5</b>   | 2.59 | 3.30E-03 | 1.74 | 3.11E-02 |
| <b>GRHPR</b>   | 2.59 | 7.40E-03 | 2.94 | 4.40E-03 |
| <b>RFXANK</b>  | 2.59 | 7.80E-03 | b.t. | n.s.     |
| <b>CRLS1</b>   | 2.58 | 1.97E-02 | b.t. | n.s.     |
| <b>MRPS5</b>   | 2.58 | 3.81E-02 | b.t. | n.s.     |
| <b>PAX5</b>    | 2.58 | 3.55E-02 | b.t. | n.s.     |
| <b>PLEKHO1</b> | 2.58 | 3.92E-02 | b.t. | n.s.     |
| <b>RAB27A</b>  | 2.58 | 3.16E-02 | b.t. | n.s.     |
| <b>REXO2</b>   | 2.58 | 2.46E-02 | b.t. | n.s.     |
| <b>GTF2H3</b>  | 2.57 | 1.09E-02 | 2.45 | 4.70E-02 |
| <b>HNRNPA1</b> | 2.57 | 2.29E-02 | b.t. | n.s.     |
| <b>KLF6</b>    | 2.57 | 3.97E-02 | b.t. | n.s.     |

|               |      |          |      |          |
|---------------|------|----------|------|----------|
| MRPL48        | 2.57 | 4.71E-02 | b.t. | n.s.     |
| THOC7         | 2.57 | 8.60E-03 | b.t. | n.s.     |
| YWHAE         | 2.57 | 9.80E-03 | 2.4  | 3.07E-02 |
| UBQLN2        | 2.56 | 2.80E-03 | 2.44 | 3.10E-03 |
| ASXL1         | 2.56 | 6.00E-04 | 3.8  | 1.00E-04 |
| GLS           | 2.56 | 1.64E-02 | 1.86 | 3.69E-02 |
| PPP4C         | 2.56 | 3.67E-02 | b.t. | n.s.     |
| HMGB2         | 2.55 | 2.83E-02 | b.t. | n.s.     |
| NDUFB8        | 2.55 | 3.10E-03 | b.t. | n.s.     |
| PCBD1         | 2.55 | 2.50E-02 | b.t. | n.s.     |
| DNAJC25-GNG10 | 2.54 | 2.40E-03 | 1.85 | 5.90E-03 |
| ACOT7         | 2.54 | 5.10E-03 | 1.82 | 3.12E-02 |
| ZDHHC12       | 2.54 | 1.23E-02 | b.t. | n.s.     |
| AGPS          | 2.53 | 4.99E-02 | b.t. | n.s.     |
| CAPZB         | 2.53 | 6.60E-03 | 2.04 | 2.02E-02 |
| REEP4         | 2.53 | 7.90E-03 | 1.65 | 4.34E-02 |
| RPS6KA1       | 2.52 | 1.80E-03 | 1.94 | 2.06E-02 |
| CETN2         | 2.52 | 1.12E-02 | b.t. | n.s.     |
| SBNO2         | 2.52 | 2.05E-02 | b.t. | n.s.     |
| COPE          | 2.51 | 1.50E-02 | b.t. | n.s.     |
| FERMT2        | 2.51 | 3.57E-02 | b.t. | n.s.     |
| MORN2         | 2.51 | 3.40E-03 | b.t. | n.s.     |
| POC5          | 2.51 | 2.91E-02 | 2.66 | 1.89E-02 |
| TMEM167A      | 2.5  | 3.33E-02 | b.t. | n.s.     |
| VCP           | 2.5  | 3.20E-03 | b.t. | n.s.     |
| COX5B         | 2.49 | 2.99E-02 | b.t. | n.s.     |
| S1PR2         | 2.49 | 2.16E-02 | b.t. | n.s.     |
| COMMD4        | 2.48 | 1.16E-02 | b.t. | n.s.     |
| MIPEP         | 2.48 | 4.00E-03 | 2.09 | 4.18E-02 |

|          |      |          |      |          |
|----------|------|----------|------|----------|
| NUDT19   | 2.48 | 2.02E-02 | b.t. | n.s.     |
| PPME1    | 2.48 | 6.90E-03 | b.t. | n.s.     |
| SUMO1    | 2.48 | 1.47E-02 | 2.3  | 1.92E-02 |
| TXNL1    | 2.47 | 2.91E-02 | b.t. | n.s.     |
| SRGN     | 2.46 | 9.10E-03 | 2.23 | 3.00E-02 |
| TSPAN17  | 2.46 | 3.00E-04 | b.t. | n.s.     |
| ATP6V0E1 | 2.45 | 2.71E-02 | b.t. | n.s.     |
| BABAM1   | 2.45 | 1.55E-02 | b.t. | n.s.     |
| NENF     | 2.45 | 7.47E-05 | b.t. | n.s.     |
| TIGD2    | 2.45 | 1.72E-02 | 3.14 | 3.90E-03 |
| MCTS1    | 2.44 | 3.36E-02 | b.t. | n.s.     |
| TP53     | 2.42 | 4.23E-02 | b.t. | n.s.     |
| CEBPG    | 2.42 | 2.48E-02 | b.t. | n.s.     |
| SF3B5    | 2.42 | 4.46E-02 | b.t. | n.s.     |
| ACAT1    | 2.42 | 3.35E-02 | b.t. | n.s.     |
| GMPPB    | 2.42 | 3.05E-02 | b.t. | n.s.     |
| NANS     | 2.42 | 3.22E-02 | b.t. | n.s.     |
| NDUFB6   | 2.41 | 1.72E-02 | b.t. | n.s.     |
| BLM      | 2.41 | 4.62E-02 | b.t. | n.s.     |
| CFL1     | 2.41 | 2.15E-02 | b.t. | n.s.     |
| FUCA2    | 2.41 | 4.08E-02 | b.t. | n.s.     |
| NDUFB10  | 2.41 | 4.39E-02 | b.t. | n.s.     |
| TUBB8    | 2.41 | 4.50E-03 | b.t. | n.s.     |
| TSPAN31  | 2.4  | 1.86E-02 | b.t. | n.s.     |
| VLDLR    | 2.4  | 1.20E-03 | b.t. | n.s.     |
| UQCDFS1  | 2.39 | 1.30E-02 | b.t. | n.s.     |
| IMPAD1   | 2.39 | 4.56E-02 | b.t. | n.s.     |
| KATNA1   | 2.39 | 9.60E-03 | b.t. | n.s.     |
| USP46    | 2.39 | 1.15E-02 | b.t. | n.s.     |

|          |      |          |      |          |
|----------|------|----------|------|----------|
| VPS25    | 2.39 | 2.96E-02 | b.t. | n.s.     |
| MSMO1    | 2.38 | 4.06E-02 | b.t. | n.s.     |
| CUEDC2   | 2.37 | 3.37E-02 | b.t. | n.s.     |
| MRPS33   | 2.37 | 2.91E-02 | b.t. | n.s.     |
| RPA2     | 2.37 | 1.66E-02 | 1.81 | 3.28E-02 |
| SARNP    | 2.37 | 4.47E-02 | b.t. | n.s.     |
| SLC39A9  | 2.37 | 5.40E-03 | b.t. | n.s.     |
| AGA      | 2.36 | 4.90E-03 | b.t. | n.s.     |
| POMGNT1  | 2.36 | 2.10E-02 | b.t. | n.s.     |
| PPIH     | 2.36 | 3.43E-02 | b.t. | n.s.     |
| PPM1M    | 2.36 | 4.23E-02 | b.t. | n.s.     |
| CCT6A    | 2.35 | 2.23E-02 | 2    | 4.34E-02 |
| HNRNPL   | 2.35 | 1.63E-02 | b.t. | n.s.     |
| HSP90AB1 | 2.35 | 3.18E-02 | b.t. | n.s.     |
| MRPL51   | 2.35 | 1.82E-02 | b.t. | n.s.     |
| DYNLRB1  | 2.34 | 7.40E-03 | b.t. | n.s.     |
| LILRB2   | 2.34 | 1.48E-02 | 2.8  | 6.20E-03 |
| NDUFV1   | 2.34 | 4.70E-03 | 1.91 | 1.10E-02 |
| PIH1D1   | 2.34 | 1.22E-02 | b.t. | n.s.     |
| RPL39L   | 2.33 | 4.95E-02 | 2.24 | 4.59E-02 |
| COPZ1    | 2.33 | 3.99E-02 | b.t. | n.s.     |
| XRCC6    | 2.33 | 3.49E-02 | b.t. | n.s.     |
| ANXA5    | 2.32 | 2.20E-02 | b.t. | n.s.     |
| PGM2     | 2.32 | 1.80E-03 | b.t. | n.s.     |
| CETN3    | 2.31 | 1.38E-02 | b.t. | n.s.     |
| NDUFB1   | 2.31 | 4.30E-03 | b.t. | n.s.     |
| RAB10    | 2.31 | 4.85E-02 | 2.32 | 4.57E-02 |
| RPS27L   | 2.31 | 2.76E-02 | b.t. | n.s.     |
| SNRPA    | 2.31 | 2.67E-02 | b.t. | n.s.     |

|          |      |          |      |          |
|----------|------|----------|------|----------|
| ALDOA    | 2.3  | 2.35E-02 | b.t. | n.s.     |
| CANX     | 2.3  | 9.00E-04 | 1.68 | 4.72E-02 |
| FLAD1    | 2.3  | 4.93E-02 | b.t. | n.s.     |
| HARS     | 2.3  | 2.78E-02 | b.t. | n.s.     |
| SLC25A11 | 2.3  | 3.00E-03 | b.t. | n.s.     |
| SSR4     | 2.3  | 2.42E-02 | b.t. | n.s.     |
| CHMP2A   | 2.29 | 9.80E-03 | b.t. | n.s.     |
| ELAVL1   | 2.29 | 8.30E-03 | b.t. | n.s.     |
| HLA3     | 2.29 | 1.03E-02 | b.t. | n.s.     |
| STRAP    | 2.29 | 2.52E-02 | b.t. | n.s.     |
| RPP25L   | 2.28 | 2.08E-02 | b.t. | n.s.     |
| DAP3     | 2.28 | 2.71E-02 | b.t. | n.s.     |
| ETFA     | 2.28 | 5.70E-03 | 2.08 | 5.10E-03 |
| MED8     | 2.28 | 2.46E-02 | b.t. | n.s.     |
| ANXA7    | 2.27 | 7.40E-03 | 1.79 | 1.42E-02 |
| EDF1     | 2.27 | 1.42E-02 | b.t. | n.s.     |
| MOB1A    | 2.27 | 3.92E-02 | 2.03 | 3.90E-02 |
| SREBF2   | 2.27 | 2.14E-02 | b.t. | n.s.     |
| COPS6    | 2.26 | 1.83E-02 | 1.92 | 3.07E-02 |
| NDUFV2   | 2.26 | 3.00E-02 | 2.48 | 1.00E-02 |
| PLD2     | 2.26 | 1.00E-04 | 1.68 | 6.30E-03 |
| HSPBP1   | 2.25 | 3.80E-02 | b.t. | n.s.     |
| SF3B3    | 2.25 | 2.07E-02 | b.t. | n.s.     |
| ACSL1    | 2.24 | 3.89E-02 | b.t. | n.s.     |
| ARPC1A   | 2.24 | 2.23E-02 | b.t. | n.s.     |
| ISY1     | 2.24 | 2.22E-02 | b.t. | n.s.     |
| MAPK13   | 2.24 | 2.77E-02 | b.t. | n.s.     |
| SLC25A52 | 2.23 | 1.62E-02 | 1.91 | 2.20E-02 |
| ACTB     | 2.23 | 1.48E-02 | b.t. | n.s.     |

|         |      |          |      |          |
|---------|------|----------|------|----------|
| CAPN1   | 2.23 | 7.00E-04 | b.t. | n.s.     |
| CASZ1   | 2.23 | 1.24E-02 | 1.94 | 1.20E-03 |
| DDB1    | 2.23 | 9.10E-03 | b.t. | n.s.     |
| MRFAP1  | 2.23 | 2.66E-02 | b.t. | n.s.     |
| NAV1    | 2.23 | 3.04E-02 | b.t. | n.s.     |
| ACTA1   | 2.22 | 3.00E-03 | b.t. | n.s.     |
| RBX1    | 2.22 | 4.64E-02 | b.t. | n.s.     |
| LSM7    | 2.21 | 4.94E-02 | b.t. | n.s.     |
| MECR    | 2.21 | 1.42E-02 | b.t. | n.s.     |
| RBBP9   | 2.21 | 4.22E-02 | 2.17 | 1.65E-02 |
| BLMH    | 2.2  | 1.83E-02 | b.t. | n.s.     |
| RPL12   | 2.2  | 3.90E-03 | b.t. | n.s.     |
| USP12   | 2.2  | 2.60E-02 | 6.03 | 1.00E-04 |
| BDH1    | 2.19 | 2.63E-02 | b.t. | n.s.     |
| CASP6   | 2.19 | 1.77E-02 | b.t. | n.s.     |
| MAP3K14 | 2.19 | 4.75E-02 | b.t. | n.s.     |
| MRPL28  | 2.19 | 1.97E-02 | b.t. | n.s.     |
| PDIA3   | 2.19 | 7.20E-03 | b.t. | n.s.     |
| ISOC1   | 2.18 | 2.10E-02 | b.t. | n.s.     |
| RPL10A  | 2.18 | 1.16E-02 | b.t. | n.s.     |
| SPAG1   | 2.18 | 1.84E-02 | 2.5  | 1.60E-03 |
| PSMD13  | 2.17 | 2.90E-02 | b.t. | n.s.     |
| TBCB    | 2.17 | 9.30E-03 | b.t. | n.s.     |
| UBA5    | 2.17 | 1.12E-02 | b.t. | n.s.     |
| UQCR10  | 2.17 | 4.50E-02 | b.t. | n.s.     |
| CDC42   | 2.16 | 6.00E-03 | 1.81 | 1.30E-02 |
| GBA3    | 2.16 | 2.60E-02 | 2.26 | 2.18E-02 |
| MPZL1   | 2.16 | 2.43E-02 | b.t. | n.s.     |
| RALA    | 2.16 | 4.98E-02 | b.t. | n.s.     |

|          |      |          |      |          |
|----------|------|----------|------|----------|
| TALDO1   | 2.16 | 9.20E-03 | b.t. | n.s.     |
| TUBE1    | 2.16 | 2.83E-02 | b.t. | n.s.     |
| ACP2     | 2.15 | 4.20E-02 | b.t. | n.s.     |
| BSG      | 2.15 | 4.53E-02 | b.t. | n.s.     |
| LZTR1    | 2.15 | 1.10E-03 | b.t. | n.s.     |
| RYR3     | 2.15 | 8.90E-03 | b.t. | n.s.     |
| TAF9B    | 2.15 | 7.50E-03 | 1.98 | 4.23E-02 |
| UBXN1    | 2.15 | 2.60E-03 | b.t. | n.s.     |
| GNG10    | 2.14 | 2.00E-04 | 1.52 | 1.28E-02 |
| SURF4    | 2.14 | 3.50E-03 | b.t. | n.s.     |
| ASAH2B   | 2.13 | 2.03E-02 | b.t. | n.s.     |
| FBRS     | 2.13 | 5.00E-03 | b.t. | n.s.     |
| MAPRE1   | 2.13 | 2.89E-02 | 1.74 | 4.34E-02 |
| MCAT     | 2.13 | 3.64E-02 | b.t. | n.s.     |
| MDH1     | 2.13 | 2.21E-02 | 1.64 | 4.97E-02 |
| SOD1     | 2.13 | 2.16E-02 | b.t. | n.s.     |
| SRD5A3   | 2.13 | 2.35E-02 | b.t. | n.s.     |
| VAMP8    | 2.13 | 2.71E-02 | b.t. | n.s.     |
| GPX1     | 2.12 | 3.59E-02 | b.t. | n.s.     |
| MRPL19   | 2.12 | 1.41E-02 | b.t. | n.s.     |
| UQCR11   | 2.12 | 2.63E-02 | b.t. | n.s.     |
| ALDH18A1 | 2.11 | 2.65E-02 | b.t. | n.s.     |
| TXN2     | 2.11 | 3.24E-02 | b.t. | n.s.     |
| ALDH4A1  | 2.1  | 7.20E-03 | 1.86 | 1.30E-03 |
| ARMT1    | 2.1  | 2.80E-03 | b.t. | n.s.     |
| CAPNS1   | 2.1  | 4.30E-03 | b.t. | n.s.     |
| COPG1    | 2.1  | 1.50E-02 | b.t. | n.s.     |
| H3F3B    | 2.1  | 2.20E-02 | b.t. | n.s.     |
| RFFL     | 2.1  | 1.21E-02 | 3.65 | 1.10E-03 |

|                |      |          |      |          |
|----------------|------|----------|------|----------|
| <b>RPA3</b>    | 2.1  | 3.15E-02 | 1.84 | 4.23E-02 |
| <b>FBL</b>     | 2.09 | 8.30E-03 | 1.94 | 1.15E-02 |
| <b>ALAS1</b>   | 2.09 | 6.60E-03 | b.t. | n.s.     |
| <b>FKTN</b>    | 2.09 | 2.62E-02 | b.t. | n.s.     |
| <b>GNAI2</b>   | 2.09 | 2.28E-02 | b.t. | n.s.     |
| <b>UQCRC1</b>  | 2.09 | 2.73E-02 | b.t. | n.s.     |
| <b>RFC4</b>    | 2.08 | 3.48E-02 | b.t. | n.s.     |
| <b>RPS27A</b>  | 2.08 | 3.08E-02 | b.t. | n.s.     |
| <b>YIF1A</b>   | 2.08 | 2.36E-02 | b.t. | n.s.     |
| <b>DHPS</b>    | 2.07 | 3.63E-02 | 1.87 | 1.68E-02 |
| <b>MCM5</b>    | 2.07 | 4.70E-02 | b.t. | n.s.     |
| <b>RPL26</b>   | 2.07 | 3.49E-02 | b.t. | n.s.     |
| <b>TIMMDC1</b> | 2.07 | 1.60E-02 | b.t. | n.s.     |
| <b>UFC1</b>    | 2.07 | 1.28E-02 | b.t. | n.s.     |
| <b>DDOST</b>   | 2.06 | 3.36E-02 | b.t. | n.s.     |
| <b>GSS</b>     | 2.06 | 1.44E-02 | b.t. | n.s.     |
| <b>SAE1</b>    | 2.06 | 2.26E-02 | b.t. | n.s.     |
| <b>WDR1</b>    | 2.06 | 3.95E-02 | b.t. | n.s.     |
| <b>IFFO2</b>   | 2.05 | 1.39E-02 | b.t. | n.s.     |
| <b>ZNF511</b>  | 2.05 | 3.22E-02 | b.t. | n.s.     |
| <b>GTF2H4</b>  | 2.04 | 1.53E-02 | b.t. | n.s.     |
| <b>NUP188</b>  | 2.04 | 4.40E-03 | b.t. | n.s.     |
| <b>SEC61A2</b> | 2.04 | 1.92E-02 | 3.07 | 1.10E-03 |
| <b>ARL13B</b>  | 2.03 | 3.85E-02 | b.t. | n.s.     |
| <b>ECT2</b>    | 2.03 | 2.23E-02 | b.t. | n.s.     |
| <b>NEK6</b>    | 2.03 | 1.52E-02 | b.t. | n.s.     |
| <b>PRG2</b>    | 2.03 | 4.79E-02 | b.t. | n.s.     |
| <b>SPIN3</b>   | 2.03 | 4.30E-03 | 1.77 | 2.11E-02 |
| <b>UBA3</b>    | 2.03 | 9.40E-03 | 1.63 | 3.42E-02 |

|                 |      |          |      |          |
|-----------------|------|----------|------|----------|
| <b>VDAC2</b>    | 2.03 | 1.96E-02 | b.t. | n.s.     |
| <b>CLP1</b>     | 2.02 | 9.00E-03 | b.t. | n.s.     |
| <b>ACO2</b>     | 2.02 | 1.22E-02 | b.t. | n.s.     |
| <b>BRK1</b>     | 2.02 | 4.79E-02 | b.t. | n.s.     |
| <b>EBP</b>      | 2.02 | 4.21E-02 | b.t. | n.s.     |
| <b>MALSU1</b>   | 2.02 | 2.29E-02 | b.t. | n.s.     |
| <b>MON1A</b>    | 2.02 | 3.82E-05 | b.t. | n.s.     |
| <b>POLA2</b>    | 2.02 | 3.00E-04 | 2.31 | 2.00E-04 |
| <b>RNF181</b>   | 2.02 | 3.94E-02 | b.t. | n.s.     |
| <b>TMEM173</b>  | 2.02 | 3.62E-02 | b.t. | n.s.     |
| <b>HYOU1</b>    | 2.01 | 1.58E-05 | 3.79 | 3.42E-02 |
| <b>MSRB1</b>    | 2.01 | 2.49E-02 | b.t. | n.s.     |
| <b>RAP1A</b>    | 2.01 | 8.00E-04 | 2.01 | 2.00E-03 |
| <b>RBM42</b>    | 2.01 | 4.00E-03 | b.t. | n.s.     |
| <b>RPLP1</b>    | 2.01 | 6.10E-03 | b.t. | n.s.     |
| <b>RPS5</b>     | 2.01 | 1.83E-02 | b.t. | n.s.     |
| <b>UCHL5</b>    | 2.01 | 2.04E-02 | b.t. | n.s.     |
| <b>FBXW5</b>    | 2    | 2.80E-03 | b.t. | n.s.     |
| <b>RFC3</b>     | 2    | 4.70E-03 | 1.57 | 5.30E-03 |
| <b>DUSP22</b>   | 1.99 | 7.80E-03 | 2.95 | 6.00E-04 |
| <b>PEPD</b>     | 1.99 | 4.20E-02 | b.t. | n.s.     |
| <b>SLC25A33</b> | 1.99 | 4.41E-02 | b.t. | n.s.     |
| <b>TDRKH</b>    | 1.99 | 1.03E-02 | b.t. | n.s.     |
| <b>CCNB1</b>    | 1.98 | 7.70E-03 | b.t. | n.s.     |
| <b>CSE1L</b>    | 1.98 | 2.01E-02 | b.t. | n.s.     |
| <b>CWC27</b>    | 1.98 | 2.25E-02 | b.t. | n.s.     |
| <b>MRPS36</b>   | 1.98 | 2.43E-02 | 2.23 | 1.88E-02 |
| <b>NDUFA6</b>   | 1.98 | 2.43E-02 | b.t. | n.s.     |
| <b>NMT1</b>     | 1.98 | 7.40E-03 | 2.15 | 3.32E-02 |

|                 |      |          |      |          |
|-----------------|------|----------|------|----------|
| <b>RAD51C</b>   | 1.98 | 4.39E-02 | b.t. | n.s.     |
| <b>SUMO2</b>    | 1.98 | 7.90E-03 | 1.71 | 2.88E-02 |
| <b>WDR83OS</b>  | 1.98 | 4.23E-02 | b.t. | n.s.     |
| <b>RPL36AL</b>  | 1.97 | 3.74E-02 | 1.96 | 1.83E-02 |
| <b>BIVM</b>     | 1.97 | 1.56E-02 | b.t. | n.s.     |
| <b>C15orf41</b> | 1.97 | 3.79E-02 | 1.94 | 3.19E-02 |
| <b>GTF2I</b>    | 1.97 | 2.33E-02 | 3.05 | 6.40E-03 |
| <b>PRKAG1</b>   | 1.97 | 1.82E-02 | b.t. | n.s.     |
| <b>SMCO2</b>    | 1.97 | 7.10E-03 | 1.58 | 9.60E-03 |
| <b>SSNA1</b>    | 1.97 | 4.61E-02 | b.t. | n.s.     |
| <b>TIMM17B</b>  | 1.97 | 1.95E-02 | b.t. | n.s.     |
| <b>ENSA</b>     | 1.96 | 9.00E-04 | b.t. | n.s.     |
| <b>FBXW7</b>    | 1.96 | 2.78E-02 | b.t. | n.s.     |
| <b>FXR1</b>     | 1.96 | 1.96E-02 | 2.24 | 2.17E-02 |
| <b>INTS2</b>    | 1.96 | 6.70E-03 | b.t. | n.s.     |
| <b>KIAA0391</b> | 1.96 | 3.26E-02 | b.t. | n.s.     |
| <b>METTL6</b>   | 1.96 | 1.12E-02 | b.t. | n.s.     |
| <b>MRPL55</b>   | 1.96 | 3.48E-02 | b.t. | n.s.     |
| <b>NONO</b>     | 1.96 | 5.20E-03 | b.t. | n.s.     |
| <b>TCF19</b>    | 1.96 | 4.96E-02 | b.t. | n.s.     |
| <b>TKT</b>      | 1.96 | 2.09E-02 | b.t. | n.s.     |
| <b>UBE2A</b>    | 1.96 | 4.70E-03 | b.t. | n.s.     |
| <b>ASPSCR1</b>  | 1.95 | 2.09E-02 | b.t. | n.s.     |
| <b>CLTB</b>     | 1.95 | 2.02E-02 | b.t. | n.s.     |
| <b>EIF3K</b>    | 1.95 | 4.26E-02 | b.t. | n.s.     |
| <b>RPS24</b>    | 1.95 | 4.60E-03 | 1.58 | 1.62E-02 |
| <b>TNFRSF8</b>  | 1.95 | 1.76E-02 | 2.88 | 6.80E-03 |
| <b>TSR3</b>     | 1.95 | 2.51E-02 | b.t. | n.s.     |
| <b>ZNF281</b>   | 1.95 | 4.80E-03 | 1.79 | 5.70E-03 |

|         |      |          |      |          |
|---------|------|----------|------|----------|
| CISD3   | 1.94 | 1.19E-02 | b.t. | n.s.     |
| KCTD17  | 1.94 | 2.70E-03 | b.t. | n.s.     |
| P4HB    | 1.94 | 8.30E-03 | b.t. | n.s.     |
| SEPHS1  | 1.94 | 2.26E-02 | b.t. | n.s.     |
| CNIH4   | 1.93 | 4.97E-02 | b.t. | n.s.     |
| OAT     | 1.93 | 3.95E-02 | b.t. | n.s.     |
| SLC25A6 | 1.93 | 3.03E-02 | b.t. | n.s.     |
| PRDX5   | 1.92 | 4.88E-02 | b.t. | n.s.     |
| PSMG3   | 1.92 | 1.66E-02 | 2.04 | 3.32E-02 |
| SEC13   | 1.92 | 1.94E-02 | b.t. | n.s.     |
| AP1AR   | 1.91 | 8.00E-04 | b.t. | n.s.     |
| LETM1   | 1.91 | 3.43E-02 | b.t. | n.s.     |
| PLCB3   | 1.91 | 1.00E-04 | 1.7  | 5.40E-03 |
| RPL18A  | 1.91 | 4.60E-03 | 1.69 | 3.49E-02 |
| SAMD10  | 1.91 | 1.88E-05 | b.t. | n.s.     |
| SDHC    | 1.91 | 2.42E-02 | b.t. | n.s.     |
| SRRD    | 1.91 | 3.23E-02 | b.t. | n.s.     |
| VKORC1  | 1.91 | 1.88E-02 | b.t. | n.s.     |
| GNE     | 1.9  | 1.78E-02 | b.t. | n.s.     |
| MAP2K1  | 1.9  | 2.99E-02 | b.t. | n.s.     |
| MED16   | 1.9  | 6.30E-03 | b.t. | n.s.     |
| MGST3   | 1.9  | 4.50E-02 | b.t. | n.s.     |
| MRPL45  | 1.9  | 2.11E-02 | b.t. | n.s.     |
| NARS2   | 1.9  | 2.16E-02 | b.t. | n.s.     |
| RANGAP1 | 1.9  | 1.97E-02 | b.t. | n.s.     |
| THEMIS2 | 1.9  | 8.00E-04 | b.t. | n.s.     |
| TRIM24  | 1.9  | 8.70E-03 | b.t. | n.s.     |
| VTI1B   | 1.9  | 4.03E-02 | b.t. | n.s.     |
| ZBTB8OS | 1.9  | 3.99E-02 | 1.58 | 1.81E-02 |

|                 |      |          |      |          |
|-----------------|------|----------|------|----------|
| <b>AKR1B1</b>   | 1.89 | 2.01E-02 | b.t. | n.s.     |
| <b>COG7</b>     | 1.89 | 1.80E-02 | b.t. | n.s.     |
| <b>DR1</b>      | 1.89 | 3.20E-02 | b.t. | n.s.     |
| <b>GALNT10</b>  | 1.89 | 2.81E-02 | 1.62 | 2.07E-02 |
| <b>JTB</b>      | 1.89 | 1.83E-02 | b.t. | n.s.     |
| <b>NDUFS4</b>   | 1.89 | 6.60E-03 | b.t. | n.s.     |
| <b>SHKBP1</b>   | 1.89 | 3.20E-03 | b.t. | n.s.     |
| <b>TPRA1</b>    | 1.89 | 3.29E-02 | b.t. | n.s.     |
| <b>BNIP1</b>    | 1.88 | 2.06E-02 | b.t. | n.s.     |
| <b>C15orf65</b> | 1.88 | 1.40E-03 | b.t. | n.s.     |
| <b>PAFAH1B3</b> | 1.88 | 4.30E-02 | b.t. | n.s.     |
| <b>PNKP</b>     | 1.88 | 3.36E-02 | b.t. | n.s.     |
| <b>RPUSD3</b>   | 1.88 | 1.52E-02 | b.t. | n.s.     |
| <b>TPX2</b>     | 1.88 | 2.12E-02 | b.t. | n.s.     |
| <b>GGCX</b>     | 1.87 | 7.20E-03 | b.t. | n.s.     |
| <b>MSRB2</b>    | 1.87 | 4.90E-02 | b.t. | n.s.     |
| <b>MT1F</b>     | 1.87 | 2.67E-02 | b.t. | n.s.     |
| <b>OCIAD1</b>   | 1.87 | 2.04E-02 | b.t. | n.s.     |
| <b>TFDP2</b>    | 1.87 | 1.86E-02 | 2.78 | 1.70E-03 |
| <b>ARCN1</b>    | 1.86 | 6.30E-03 | b.t. | n.s.     |
| <b>CHMP1A</b>   | 1.86 | 6.90E-03 | b.t. | n.s.     |
| <b>HLA-F</b>    | 1.86 | 3.99E-02 | b.t. | n.s.     |
| <b>PHF5A</b>    | 1.86 | 3.79E-02 | b.t. | n.s.     |
| <b>PLL</b>      | 1.86 | 1.70E-03 | b.t. | n.s.     |
| <b>RAB1B</b>    | 1.86 | 1.53E-02 | b.t. | n.s.     |
| <b>RABEPK</b>   | 1.86 | 3.12E-02 | b.t. | n.s.     |
| <b>RNF126</b>   | 1.86 | 3.60E-02 | b.t. | n.s.     |
| <b>ATP13A3</b>  | 1.85 | 4.05E-02 | b.t. | n.s.     |
| <b>G6PD</b>     | 1.85 | 2.43E-02 | b.t. | n.s.     |

|          |      |          |      |          |
|----------|------|----------|------|----------|
| NCK2     | 1.85 | 1.50E-03 | 1.89 | 4.82E-02 |
| PTGES2   | 1.85 | 2.31E-02 | b.t. | n.s.     |
| SKA3     | 1.85 | 1.66E-02 | b.t. | n.s.     |
| SLC35B4  | 1.85 | 3.60E-02 | b.t. | n.s.     |
| STXBP2   | 1.85 | 1.04E-02 | b.t. | n.s.     |
| UBE2T    | 1.84 | 1.54E-02 | b.t. | n.s.     |
| KRAS     | 1.83 | 4.03E-02 | b.t. | n.s.     |
| ADIPOR2  | 1.83 | 8.60E-03 | b.t. | n.s.     |
| ARSB     | 1.83 | 2.61E-02 | 2.41 | 1.05E-02 |
| C11orf49 | 1.83 | 8.00E-04 | b.t. | n.s.     |
| C17orf75 | 1.83 | 2.44E-02 | b.t. | n.s.     |
| HAAO     | 1.83 | 3.30E-03 | b.t. | n.s.     |
| MRPS14   | 1.83 | 1.17E-02 | b.t. | n.s.     |
| TAX1BP3  | 1.82 | 6.40E-03 | b.t. | n.s.     |
| SNX1     | 1.82 | 2.69E-02 | b.t. | n.s.     |
| STX8     | 1.82 | 2.09E-02 | b.t. | n.s.     |
| CDK7     | 1.81 | 2.00E-04 | b.t. | n.s.     |
| DHTKD1   | 1.81 | 4.15E-02 | 2.15 | 1.67E-02 |
| FASTK    | 1.81 | 1.42E-02 | b.t. | n.s.     |
| KLHL4    | 1.81 | 2.30E-03 | b.t. | n.s.     |
| PEX3     | 1.81 | 1.64E-02 | b.t. | n.s.     |
| RPL36A   | 1.81 | 3.62E-02 | b.t. | n.s.     |
| TMEM230  | 1.81 | 4.81E-02 | b.t. | n.s.     |
| ADH5     | 1.8  | 4.86E-02 | b.t. | n.s.     |
| HSPB11   | 1.8  | 2.56E-02 | 2.1  | 3.51E-02 |
| KEAP1    | 1.8  | 3.29E-02 | b.t. | n.s.     |
| RBM14    | 1.8  | 9.50E-03 | b.t. | n.s.     |
| RPL7A    | 1.79 | 6.64E-05 | 1.59 | 3.60E-03 |
| DUSP23   | 1.79 | 2.70E-02 | b.t. | n.s.     |

|          |      |          |      |          |
|----------|------|----------|------|----------|
| POMK     | 1.79 | 2.05E-02 | 1.62 | 3.66E-02 |
| PPIE     | 1.79 | 3.34E-02 | b.t. | n.s.     |
| ANAPC1   | 1.78 | 2.67E-02 | b.t. | n.s.     |
| AP4B1    | 1.78 | 6.90E-03 | b.t. | n.s.     |
| ARPC2    | 1.78 | 9.00E-04 | 1.89 | 1.00E-04 |
| BCL9     | 1.78 | 8.70E-03 | 1.89 | 1.01E-02 |
| SERPINI2 | 1.78 | 4.90E-03 | b.t. | n.s.     |
| THUMPD3  | 1.78 | 1.12E-02 | b.t. | n.s.     |
| FAF2     | 1.77 | 4.20E-03 | b.t. | n.s.     |
| GLYR1    | 1.77 | 2.49E-02 | b.t. | n.s.     |
| LRRC41   | 1.77 | 3.47E-02 | b.t. | n.s.     |
| MFN2     | 1.77 | 3.45E-02 | b.t. | n.s.     |
| PPP1CA   | 1.77 | 4.02E-02 | b.t. | n.s.     |
| PPP6R2   | 1.77 | 1.94E-02 | b.t. | n.s.     |
| PRPF31   | 1.77 | 3.76E-02 | b.t. | n.s.     |
| RSU1     | 1.77 | 4.34E-02 | b.t. | n.s.     |
| ZNF829   | 1.77 | 4.37E-02 | b.t. | n.s.     |
| AKR1B10  | 1.76 | 2.00E-04 | b.t. | n.s.     |
| CYLC2    | 1.76 | 4.51E-02 | b.t. | n.s.     |
| NIPSNAP1 | 1.76 | 2.57E-02 | b.t. | n.s.     |
| PTP4A2   | 1.76 | 2.99E-02 | 1.78 | 1.17E-02 |
| RNF8     | 1.76 | 1.71E-02 | b.t. | n.s.     |
| SCAMP3   | 1.76 | 1.16E-02 | b.t. | n.s.     |
| FAM229B  | 1.75 | 6.70E-03 | b.t. | n.s.     |
| CALU     | 1.75 | 1.79E-02 | b.t. | n.s.     |
| DAZAP1   | 1.75 | 2.26E-02 | b.t. | n.s.     |
| KDELR2   | 1.75 | 4.79E-02 | b.t. | n.s.     |
| STAP2    | 1.75 | 1.84E-02 | b.t. | n.s.     |
| TPM3     | 1.75 | 2.00E-02 | b.t. | n.s.     |

|                |      |          |      |          |
|----------------|------|----------|------|----------|
| TRPC6          | 1.75 | 2.00E-04 | b.t. | n.s.     |
| ZMPSTE24       | 1.75 | 4.36E-02 | b.t. | n.s.     |
| CDK5R1         | 1.74 | 3.20E-02 | b.t. | n.s.     |
| IARS2          | 1.74 | 3.60E-02 | b.t. | n.s.     |
| MIEF1          | 1.74 | 4.67E-02 | b.t. | n.s.     |
| PEX19          | 1.74 | 1.03E-02 | b.t. | n.s.     |
| PPP2R5D        | 1.74 | 5.00E-04 | b.t. | n.s.     |
| SFXN2          | 1.74 | 3.48E-02 | b.t. | n.s.     |
| TTC1           | 1.74 | 4.82E-02 | b.t. | n.s.     |
| UHRF1BP1       | 1.74 | 2.05E-02 | b.t. | n.s.     |
| CENPH          | 1.73 | 4.32E-02 | b.t. | n.s.     |
| DNAAF5         | 1.73 | 4.70E-02 | b.t. | n.s.     |
| HDAC3          | 1.73 | 7.50E-03 | b.t. | n.s.     |
| RMDN3          | 1.73 | 2.83E-02 | b.t. | n.s.     |
| RPS17          | 1.73 | 3.69E-02 | 1.71 | 1.55E-02 |
| TMEM189-UBE2V1 | 1.73 | 1.74E-02 | b.t. | n.s.     |
| VDAC3          | 1.73 | 3.84E-02 | b.t. | n.s.     |
| TRIM77         | 1.72 | 1.90E-02 | b.t. | n.s.     |
| FLOT2          | 1.72 | 2.43E-02 | b.t. | n.s.     |
| LIMK2          | 1.72 | 9.30E-03 | 1.54 | 2.70E-02 |
| OGFOD1         | 1.72 | 4.78E-02 | 2.63 | 2.80E-03 |
| RPE            | 1.72 | 4.77E-02 | b.t. | n.s.     |
| RPL37A         | 1.72 | 3.30E-03 | 1.9  | 8.00E-04 |
| SLC25A26       | 1.72 | 3.80E-02 | 1.76 | 2.90E-02 |
| SLC35A2        | 1.72 | 9.00E-04 | b.t. | n.s.     |
| TMOD1          | 1.72 | 8.30E-03 | 2.02 | 1.20E-03 |
| COMMD5         | 1.71 | 1.71E-02 | b.t. | n.s.     |
| AAR2           | 1.71 | 4.05E-02 | b.t. | n.s.     |
| ARID3A         | 1.71 | 4.91E-02 | b.t. | n.s.     |

|          |      |          |      |          |
|----------|------|----------|------|----------|
| ARL6IP4  | 1.71 | 3.36E-02 | b.t. | n.s.     |
| BCKDHB   | 1.71 | 1.50E-02 | b.t. | n.s.     |
| CXorf40A | 1.71 | 7.10E-03 | b.t. | n.s.     |
| DARS2    | 1.71 | 2.47E-02 | b.t. | n.s.     |
| IL10RB   | 1.71 | 4.42E-02 | 2.34 | 3.30E-03 |
| RPS21    | 1.71 | 2.34E-02 | b.t. | n.s.     |
| SLC33A1  | 1.71 | 2.60E-03 | b.t. | n.s.     |
| STIL     | 1.71 | 6.10E-03 | b.t. | n.s.     |
| TAF12    | 1.71 | 3.68E-02 | b.t. | n.s.     |
| ZNF197   | 1.7  | 1.00E-02 | b.t. | n.s.     |
| ACTR3    | 1.7  | 1.38E-02 | b.t. | n.s.     |
| ARID3B   | 1.7  | 1.03E-02 | b.t. | n.s.     |
| BUB1     | 1.7  | 4.02E-02 | b.t. | n.s.     |
| EIF4EBP2 | 1.7  | 4.13E-02 | b.t. | n.s.     |
| KATNBL1  | 1.7  | 2.66E-02 | b.t. | n.s.     |
| MLH1     | 1.7  | 2.12E-02 | 2.06 | 2.50E-03 |
| MTF1     | 1.7  | 3.02E-02 | b.t. | n.s.     |

| WT (Aviano) | Fold Change (CvsA) | P-val (CvsA) | Fold Change (DvsB) | P-val (DvsB) |
|-------------|--------------------|--------------|--------------------|--------------|
| CD80        | 31.49              | 5.40E-03     | 7.89               | 1.55E-02     |
| IL2RA       | 31.23              | 2.20E-03     | 40.38              | 2.00E-04     |
| CYBRD1      | 28.05              | 1.09E-05     | 12.76              | 3.00E-04     |
| RFTN1       | 22.95              | 1.14E-05     | 11.84              | 5.91E-05     |
| FLVCR2      | 19.25              | 5.27E-06     | 11.79              | 3.54E-06     |
| TNFRSF9     | 18.31              | 2.80E-03     | 7.24               | 4.78E-02     |
| <b>EZH2</b> | 17.59              | 2.00E-04     | 11.2               | 3.00E-04     |
| MGLL        | 17.04              | 3.00E-04     | 15.16              | 3.00E-04     |
| NCF2        | 16.27              | 1.00E-04     | 8.69               | 1.50E-03     |
| TVP23A      | 16.23              | 3.60E-03     | b.t.               | n.s.         |

|                 |       |          |       |          |
|-----------------|-------|----------|-------|----------|
| <b>GPR132</b>   | 15.44 | 2.49E-06 | 20.35 | 1.22E-07 |
| <b>TRAF1</b>    | 14.88 | 1.56E-05 | 26.58 | 2.63E-05 |
| <b>SLAMF7</b>   | 14.47 | 7.00E-04 | b.t.  | n.s.     |
| <b>ELL2</b>     | 11.96 | 2.72E-05 | 9.46  | 5.27E-05 |
| <b>TNFSF4</b>   | 10.33 | 5.00E-04 | 4.71  | 1.30E-03 |
| <b>ARHGAP31</b> | 10.11 | 7.00E-04 | 12.85 | 6.00E-04 |
| <b>SEMA7A</b>   | 9.11  | 3.60E-03 | 9.69  | 8.00E-04 |
| <b>KDM2B</b>    | 8.99  | 1.10E-03 | 6.52  | 4.30E-03 |
| <b>CHAC1</b>    | 8.9   | 1.76E-02 | b.t.  | n.s.     |
| <b>SLC43A3</b>  | 8.54  | 1.40E-03 | b.t.  | n.s.     |
| <b>KCNN4</b>    | 7.73  | 1.19E-05 | 6.81  | 7.43E-05 |
| <b>PTGER4</b>   | 7.58  | 5.00E-04 | 6.13  | 7.70E-03 |
| <b>EIF4EBP1</b> | 7.56  | 6.90E-03 | b.t.  | n.s.     |
| <b>RHOF</b>     | 7.46  | 2.37E-05 | 7.2   | 4.04E-05 |
| <b>TFRC</b>     | 7.41  | 1.00E-04 | 5.59  | 6.00E-04 |
| <b>VEGFA</b>    | 7.21  | 1.66E-02 | b.t.  | n.s.     |
| <b>RASSF2</b>   | 6.75  | 1.40E-03 | 4.27  | 1.10E-02 |
| <b>LTA</b>      | 6.71  | 1.90E-03 | 5.52  | 1.90E-03 |
| <b>FAM129A</b>  | 6.49  | 1.41E-02 | 4.94  | 3.20E-02 |
| <b>BID</b>      | 6.43  | 1.09E-02 | 5.05  | 4.25E-02 |
| <b>HUWE1</b>    | 6.42  | 3.00E-04 | 3.94  | 1.50E-03 |
| <b>ARNTL2</b>   | 6.24  | 8.50E-03 | 8.02  | 2.10E-03 |
| <b>NEK6</b>     | 6.11  | 3.00E-04 | b.t.  | n.s.     |
| <b>CDKN1A</b>   | 6.1   | 8.00E-04 | 5.98  | 4.90E-03 |
| <b>CCND2</b>    | 6.01  | 1.60E-03 | 4.18  | 1.33E-02 |
| <b>IGSF3</b>    | 5.87  | 3.20E-02 | b.t.  | n.s.     |
| <b>BATF</b>     | 5.85  | 2.55E-02 | b.t.  | n.s.     |
| <b>CLIC2</b>    | 5.5   | 1.12E-02 | 14.03 | 6.00E-04 |
| <b>TNFAIP3</b>  | 5.5   | 3.49E-05 | 9.87  | 1.26E-05 |

|                |      |          |       |          |
|----------------|------|----------|-------|----------|
| <b>GPR183</b>  | 5.42 | 7.70E-03 | 35.31 | 8.00E-04 |
| <b>C4orf46</b> | 5.34 | 5.00E-03 | 5.19  | 6.00E-03 |
| <b>NFKBIA</b>  | 5.23 | 3.00E-04 | 5.78  | 3.37E-05 |
| <b>LRP8</b>    | 5.15 | 1.43E-02 | b.t.  | n.s.     |
| <b>SLC7A5</b>  | 5.11 | 1.27E-02 | b.t.  | n.s.     |
| <b>SESN2</b>   | 5.05 | 4.40E-03 | b.t.  | n.s.     |
| <b>CAD</b>     | 5.04 | 1.56E-02 | b.t.  | n.s.     |
| <b>CTH</b>     | 5.03 | 5.30E-03 | 4.4   | 2.33E-02 |
| <b>ADCY3</b>   | 4.88 | 1.50E-03 | b.t.  | n.s.     |
| <b>PAICS</b>   | 4.82 | 4.46E-02 | b.t.  | n.s.     |
| <b>SLC1A5</b>  | 4.82 | 1.33E-02 | b.t.  | n.s.     |
| <b>TSPAN33</b> | 4.77 | 8.00E-04 | 2.86  | 8.30E-03 |
| <b>BASP1</b>   | 4.74 | 6.60E-03 | 3.81  | 2.05E-02 |
| <b>PDGFA</b>   | 4.68 | 3.70E-03 | b.t.  | n.s.     |
| <b>TRIP10</b>  | 4.61 | 2.00E-04 | 6.23  | 1.00E-04 |
| <b>MTHFD1L</b> | 4.51 | 5.20E-03 | b.t.  | n.s.     |
| <b>SNX11</b>   | 4.5  | 6.80E-03 | 2.37  | 4.25E-02 |
| <b>DDIT4</b>   | 4.47 | 5.50E-03 | b.t.  | n.s.     |
| <b>ST8SIA4</b> | 4.45 | 1.00E-03 | 4.66  | 5.90E-03 |
| <b>IL2RB</b>   | 4.42 | 2.63E-02 | b.t.  | n.s.     |
| <b>CHAF1B</b>  | 4.41 | 4.60E-03 | 2.31  | 2.59E-02 |
| <b>PREX1</b>   | 4.38 | 1.96E-02 | b.t.  | n.s.     |
| <b>LCP1</b>    | 4.17 | 7.70E-03 | b.t.  | n.s.     |
| <b>RANBP1</b>  | 4.1  | 2.27E-02 | b.t.  | n.s.     |
| <b>TTK</b>     | 4.05 | 6.00E-04 | 2.92  | 6.70E-03 |
| <b>AIFM2</b>   | 4.03 | 4.20E-03 | b.t.  | n.s.     |
| <b>HMSD</b>    | 4.02 | 1.37E-02 | 5.12  | 1.40E-03 |
| <b>ABTB2</b>   | 4.01 | 5.00E-03 | 5.22  | 9.00E-04 |
| <b>PLGRKT</b>  | 3.99 | 3.60E-03 | 2.97  | 2.74E-02 |

|         |      |          |      |          |
|---------|------|----------|------|----------|
| SLC7A1  | 3.99 | 1.20E-02 | b.t. | n.s.     |
| GPR157  | 3.98 | 1.46E-02 | b.t. | n.s.     |
| ADAT2   | 3.95 | 5.80E-03 | b.t. | n.s.     |
| FASN    | 3.92 | 1.23E-02 | b.t. | n.s.     |
| RASSF4  | 3.88 | 1.70E-03 | 4.57 | 5.30E-03 |
| BCL2L1  | 3.86 | 6.40E-03 | 2.9  | 6.20E-03 |
| CENPW   | 3.86 | 1.76E-02 | b.t. | n.s.     |
| PDSS1   | 3.84 | 8.20E-03 | b.t. | n.s.     |
| GALNT14 | 3.81 | 8.20E-03 | b.t. | n.s.     |
| NFKB2   | 3.81 | 9.23E-05 | 4.57 | 4.52E-05 |
| JUNB    | 3.76 | 7.40E-03 | 3.79 | 9.00E-04 |
| POLA2   | 3.75 | 1.92E-07 | 3.57 | 4.37E-07 |
| DRAM1   | 3.74 | 3.92E-02 | b.t. | n.s.     |
| JUN     | 3.74 | 3.80E-03 | 5.44 | 4.40E-05 |
| MFSD2A  | 3.74 | 2.00E-02 | 2.79 | 1.95E-02 |
| PYCR1   | 3.71 | 5.00E-03 | b.t. | n.s.     |
| BCS1L   | 3.66 | 7.30E-03 | b.t. | n.s.     |
| MRPL23  | 3.64 | 2.40E-02 | b.t. | n.s.     |
| BOLA3   | 3.63 | 3.47E-02 | b.t. | n.s.     |
| SOX5    | 3.63 | 1.21E-02 | 5.22 | 4.00E-04 |
| MYO1G   | 3.61 | 5.80E-03 | 4.2  | 2.76E-02 |
| BLVRA   | 3.6  | 3.87E-05 | 2.05 | 8.60E-03 |
| PRMT1   | 3.57 | 3.86E-02 | b.t. | n.s.     |
| PKM     | 3.55 | 5.50E-03 | 3.21 | 2.07E-02 |
| ZDHC18  | 3.53 | 2.30E-03 | 3.64 | 3.50E-03 |
| PSMC2   | 3.51 | 4.00E-04 | b.t. | n.s.     |
| SLCO5A1 | 3.49 | 7.00E-04 | 5.47 | 1.70E-03 |
| HYOU1   | 3.47 | 4.00E-04 | b.t. | n.s.     |
| ASNS    | 3.45 | 9.00E-04 | b.t. | n.s.     |

|                |      |          |      |          |
|----------------|------|----------|------|----------|
| <b>FNBP1</b>   | 3.44 | 3.00E-03 | 3.76 | 3.20E-03 |
| <b>MKNK2</b>   | 3.43 | 3.10E-03 | 3.54 | 1.30E-03 |
| <b>RASGRP4</b> | 3.41 | 3.04E-02 | 6.64 | 2.00E-03 |
| <b>CD58</b>    | 3.37 | 4.40E-03 | b.t. | n.s.     |
| <b>STAP2</b>   | 3.37 | 6.00E-04 | 2.21 | 1.97E-02 |
| <b>DGAT2</b>   | 3.36 | 7.10E-03 | 3.11 | 1.19E-02 |
| <b>FERMT2</b>  | 3.35 | 9.00E-04 | b.t. | n.s.     |
| <b>ZSCAN2</b>  | 3.34 | 4.49E-02 | b.t. | n.s.     |
| <b>EXOSC8</b>  | 3.31 | 8.70E-03 | b.t. | n.s.     |
| <b>IL21R</b>   | 3.31 | 1.00E-03 | 4.3  | 3.00E-04 |
| <b>B4GALT5</b> | 3.3  | 1.72E-02 | 3.27 | 2.19E-02 |
| <b>RAB13</b>   | 3.3  | 9.70E-03 | 4.28 | 1.12E-02 |
| <b>NIFK</b>    | 3.27 | 4.14E-02 | b.t. | n.s.     |
| <b>PSMB5</b>   | 3.22 | 3.38E-02 | b.t. | n.s.     |
| <b>CYB5A</b>   | 3.21 | 1.40E-03 | 2.66 | 1.28E-02 |
| <b>ENPP4</b>   | 3.19 | 1.64E-02 | b.t. | n.s.     |
| <b>BCL2A1</b>  | 3.13 | 4.25E-02 | b.t. | n.s.     |
| <b>GOT2</b>    | 3.13 | 3.00E-04 | 2.4  | 2.60E-03 |
| <b>LDHA</b>    | 3.13 | 3.63E-02 | b.t. | n.s.     |
| <b>AIMP2</b>   | 3.11 | 9.50E-03 | b.t. | n.s.     |
| <b>LONP1</b>   | 3.11 | 4.80E-03 | b.t. | n.s.     |
| <b>TMEM63B</b> | 3.11 | 3.90E-03 | 2.62 | 3.30E-03 |
| <b>EPRS</b>    | 3.1  | 1.79E-02 | b.t. | n.s.     |
| <b>SEC61A2</b> | 3.1  | 7.50E-05 | 2.21 | 1.50E-03 |
| <b>GRHPR</b>   | 3.09 | 2.30E-03 | 3.72 | 1.10E-03 |
| <b>CCL17</b>   | 3.08 | 1.17E-02 | 4.67 | 7.00E-04 |
| <b>SSRP1</b>   | 3.05 | 1.19E-02 | b.t. | n.s.     |
| <b>OGFOD3</b>  | 3.04 | 2.88E-02 | b.t. | n.s.     |
| <b>CHRNA6</b>  | 3.01 | 4.38E-02 | 5.04 | 3.90E-03 |

|         |      |          |      |          |
|---------|------|----------|------|----------|
| NAMPT   | 3    | 2.16E-02 | b.t. | n.s.     |
| ACSL4   | 2.98 | 9.21E-05 | 1.78 | 7.70E-03 |
| RPF2    | 2.98 | 2.05E-02 | b.t. | n.s.     |
| ACAT1   | 2.97 | 2.14E-02 | b.t. | n.s.     |
| STAT3   | 2.97 | 2.60E-02 | b.t. | n.s.     |
| VDAC1   | 2.97 | 1.71E-02 | b.t. | n.s.     |
| COLCA2  | 2.95 | 8.70E-03 | 6.4  | 4.60E-03 |
| TAGLN2  | 2.95 | 1.83E-02 | 2.15 | 2.92E-02 |
| PSMC4   | 2.94 | 8.40E-03 | b.t. | n.s.     |
| LAT2    | 2.94 | 3.92E-02 | b.t. | n.s.     |
| NT5DC2  | 2.94 | 2.21E-02 | b.t. | n.s.     |
| RNF145  | 2.94 | 7.70E-03 | 2.43 | 2.03E-02 |
| XPO5    | 2.94 | 1.08E-02 | b.t. | n.s.     |
| JADE3   | 2.92 | 8.50E-03 | 2.6  | 1.49E-02 |
| PCK2    | 2.92 | 1.26E-02 | b.t. | n.s.     |
| PPP5C   | 2.92 | 5.10E-03 | b.t. | n.s.     |
| CSF2RB  | 2.9  | 7.00E-04 | 4.11 | 2.50E-03 |
| SIK1    | 2.89 | 1.20E-02 | 1.99 | 3.18E-02 |
| IER5    | 2.87 | 4.52E-06 | 2.4  | 8.86E-05 |
| BZW2    | 2.87 | 1.78E-02 | b.t. | n.s.     |
| FKTN    | 2.87 | 1.30E-03 | b.t. | n.s.     |
| PABPC4  | 2.87 | 5.50E-03 | b.t. | n.s.     |
| MTHFD2  | 2.86 | 1.68E-02 | b.t. | n.s.     |
| PPP1R9B | 2.85 | 1.10E-03 | 3.07 | 1.40E-03 |
| ARID3A  | 2.84 | 1.40E-03 | b.t. | n.s.     |
| NKRF    | 2.84 | 8.80E-03 | b.t. | n.s.     |
| DNMT3A  | 2.8  | 3.58E-02 | b.t. | n.s.     |
| PRDX1   | 2.8  | 1.04E-02 | b.t. | n.s.     |
| CCDC28B | 2.79 | 2.00E-03 | 1.9  | 7.30E-03 |

|                 |      |          |      |          |
|-----------------|------|----------|------|----------|
| <b>PSMB2</b>    | 2.79 | 2.82E-02 | b.t. | n.s.     |
| <b>ACY1</b>     | 2.75 | 1.04E-02 | b.t. | n.s.     |
| <b>FH</b>       | 2.75 | 3.00E-03 | b.t. | n.s.     |
| <b>LARS</b>     | 2.74 | 3.80E-03 | b.t. | n.s.     |
| <b>ADAMDEC1</b> | 2.73 | 1.12E-02 | 1.78 | 2.26E-02 |
| <b>MRPL3</b>    | 2.73 | 2.08E-02 | b.t. | n.s.     |
| <b>PPP1R14B</b> | 2.73 | 2.20E-02 | b.t. | n.s.     |
| <b>RRM1</b>     | 2.73 | 3.40E-03 | b.t. | n.s.     |
| <b>TCERG1</b>   | 2.73 | 1.34E-02 | b.t. | n.s.     |
| <b>DPCD</b>     | 2.72 | 1.23E-02 | b.t. | n.s.     |
| <b>STAT5A</b>   | 2.72 | 3.56E-05 | 2.64 | 3.18E-05 |
| <b>TNFRSF8</b>  | 2.7  | 6.50E-03 | 2.77 | 5.00E-04 |
| <b>HAX1</b>     | 2.69 | 4.46E-02 | b.t. | n.s.     |
| <b>RABEPK</b>   | 2.69 | 1.40E-02 | b.t. | n.s.     |
| <b>SPAG1</b>    | 2.69 | 1.40E-03 | 2.34 | 1.50E-03 |
| <b>MDFIC</b>    | 2.68 | 3.36E-02 | b.t. | n.s.     |
| <b>SYNPO</b>    | 2.68 | 3.00E-03 | 3.78 | 1.50E-03 |
| <b>ZNF460</b>   | 2.68 | 5.60E-03 | 2.27 | 4.80E-03 |
| <b>TNF</b>      | 2.67 | 2.57E-02 | 6.5  | 2.42E-02 |
| <b>CCL5</b>     | 2.65 | 4.88E-02 | 2.11 | 1.90E-02 |
| <b>CD44</b>     | 2.65 | 9.10E-03 | 3.26 | 6.00E-03 |
| <b>PDCD5</b>    | 2.65 | 1.15E-02 | b.t. | n.s.     |
| <b>PSMC1</b>    | 2.64 | 1.77E-02 | b.t. | n.s.     |
| <b>ICAM1</b>    | 2.62 | 6.10E-03 | 3.55 | 1.10E-03 |
| <b>PPIF</b>     | 2.62 | 2.43E-02 | b.t. | n.s.     |
| <b>PSMD14</b>   | 2.59 | 9.80E-03 | b.t. | n.s.     |
| <b>BLMH</b>     | 2.58 | 6.80E-03 | 2.04 | 3.17E-02 |
| <b>DESI1</b>    | 2.58 | 8.90E-03 | b.t. | n.s.     |
| <b>DSTN</b>     | 2.58 | 1.26E-02 | b.t. | n.s.     |

|        |      |          |      |          |
|--------|------|----------|------|----------|
| ANXA7  | 2.57 | 6.30E-05 | 2.04 | 3.00E-04 |
| PFAS   | 2.57 | 2.01E-02 | b.t. | n.s.     |
| RBPJ   | 2.57 | 7.87E-05 | 1.79 | 1.68E-02 |
| TMEM54 | 2.57 | 1.60E-02 | 2.54 | 2.70E-03 |
| STAT5B | 2.56 | 1.40E-03 | 2.37 | 2.40E-03 |
| TIPIN  | 2.55 | 4.88E-02 | b.t. | n.s.     |
| AKR1A1 | 2.54 | 3.91E-02 | b.t. | n.s.     |
| CTSH   | 2.54 | 2.16E-02 | 3.1  | 1.72E-02 |
| CXCR5  | 2.52 | 8.00E-03 | 4.06 | 8.00E-04 |
| PGAM1  | 2.52 | 1.86E-02 | b.t. | n.s.     |
| RBM3   | 2.52 | 4.29E-02 | b.t. | n.s.     |
| NOC3L  | 2.51 | 2.20E-03 | 2.33 | 1.14E-02 |
| PSMD11 | 2.51 | 1.69E-02 | b.t. | n.s.     |
| RDX    | 2.51 | 2.86E-02 | 2.77 | 2.58E-02 |
| SARS   | 2.51 | 4.54E-02 | b.t. | n.s.     |
| NFKB1  | 2.5  | 4.40E-03 | 3.92 | 6.00E-03 |
| SNRPA  | 2.5  | 1.28E-02 | b.t. | n.s.     |
| KBTBD6 | 2.49 | 4.40E-03 | b.t. | n.s.     |
| FERMT3 | 2.48 | 9.60E-03 | b.t. | n.s.     |
| PEA15  | 2.48 | 3.10E-03 | b.t. | n.s.     |
| PPA1   | 2.48 | 2.76E-02 | b.t. | n.s.     |
| PSMD3  | 2.48 | 1.99E-02 | b.t. | n.s.     |
| RAB9A  | 2.48 | 1.30E-03 | 4.59 | 2.06E-05 |
| DUSP4  | 2.47 | 2.11E-02 | b.t. | n.s.     |
| ECE1   | 2.47 | 1.03E-02 | 4.81 | 2.20E-03 |
| ABCF2  | 2.46 | 1.45E-02 | b.t. | n.s.     |
| ATXN2L | 2.46 | 3.20E-02 | b.t. | n.s.     |
| TMA16  | 2.46 | 2.90E-03 | b.t. | n.s.     |
| FBR5   | 2.45 | 1.01E-02 | 1.96 | 4.81E-02 |

|          |      |          |      |          |
|----------|------|----------|------|----------|
| CTTN     | 2.44 | 1.70E-03 | b.t. | n.s.     |
| KLHL6    | 2.44 | 1.95E-02 | b.t. | n.s.     |
| PSMC3    | 2.44 | 4.65E-02 | b.t. | n.s.     |
| FARSB    | 2.43 | 4.65E-02 | b.t. | n.s.     |
| MORN2    | 2.42 | 2.93E-02 | b.t. | n.s.     |
| STPG1    | 2.42 | 1.94E-02 | 1.95 | 2.67E-02 |
| DPP3     | 2.41 | 8.00E-04 | 1.65 | 4.86E-02 |
| PLAA     | 2.41 | 2.70E-03 | b.t. | n.s.     |
| VIM      | 2.41 | 4.90E-03 | 1.99 | 2.10E-02 |
| FAM136A  | 2.4  | 1.72E-02 | b.t. | n.s.     |
| RPL12    | 2.4  | 1.79E-02 | b.t. | n.s.     |
| DNAJB11  | 2.39 | 3.47E-02 | b.t. | n.s.     |
| LARP1    | 2.39 | 2.93E-02 | b.t. | n.s.     |
| POLD2    | 2.39 | 2.31E-02 | 1.64 | 4.97E-02 |
| RSL1D1   | 2.39 | 3.14E-02 | b.t. | n.s.     |
| IARS     | 2.38 | 1.50E-03 | b.t. | n.s.     |
| CBX6     | 2.36 | 5.40E-03 | 3.7  | 1.22E-02 |
| CHCHD5   | 2.36 | 2.13E-02 | b.t. | n.s.     |
| RFC2     | 2.36 | 1.94E-02 | 2.22 | 2.53E-02 |
| BCAT1    | 2.35 | 2.27E-02 | b.t. | n.s.     |
| ANP32B   | 2.34 | 3.18E-02 | b.t. | n.s.     |
| ARPC1A   | 2.34 | 3.50E-02 | b.t. | n.s.     |
| POMP     | 2.34 | 3.91E-02 | b.t. | n.s.     |
| S100A2   | 2.34 | 4.48E-02 | b.t. | n.s.     |
| ARL6     | 2.33 | 1.60E-02 | b.t. | n.s.     |
| GPR137B  | 2.33 | 3.11E-02 | b.t. | n.s.     |
| NFAT5    | 2.33 | 9.50E-03 | 1.93 | 5.60E-03 |
| TRAF3IP1 | 2.33 | 1.63E-02 | b.t. | n.s.     |
| IGF2R    | 2.32 | 5.30E-03 | b.t. | n.s.     |

|                 |      |          |      |          |
|-----------------|------|----------|------|----------|
| <b>IL10RB</b>   | 2.32 | 3.90E-03 | 2.38 | 1.70E-03 |
| <b>LGALS3</b>   | 2.32 | 4.10E-03 | b.t. | n.s.     |
| <b>IMPDH2</b>   | 2.31 | 8.80E-03 | b.t. | n.s.     |
| <b>NUDC</b>     | 2.31 | 4.80E-02 | b.t. | n.s.     |
| <b>CLPP</b>     | 2.3  | 2.52E-02 | b.t. | n.s.     |
| <b>MRPS15</b>   | 2.3  | 2.65E-02 | b.t. | n.s.     |
| <b>PSMD12</b>   | 2.3  | 2.55E-02 | b.t. | n.s.     |
| <b>CBS</b>      | 2.29 | 5.30E-03 | 1.8  | 4.34E-02 |
| <b>CCDC50</b>   | 2.29 | 1.17E-02 | 2.33 | 1.29E-02 |
| <b>COMMD1</b>   | 2.29 | 3.60E-02 | 2.46 | 2.21E-02 |
| <b>DNM1L</b>    | 2.29 | 6.90E-03 | b.t. | n.s.     |
| <b>ERO1B</b>    | 2.29 | 3.01E-02 | 2.45 | 9.00E-04 |
| <b>G3BP1</b>    | 2.29 | 4.99E-02 | 2.61 | 2.91E-02 |
| <b>POLR2H</b>   | 2.29 | 2.20E-02 | b.t. | n.s.     |
| <b>POLR1A</b>   | 2.28 | 3.59E-02 | b.t. | n.s.     |
| <b>HSPBP1</b>   | 2.27 | 2.60E-03 | b.t. | n.s.     |
| <b>TMPRSS6</b>  | 2.27 | 3.40E-03 | 2.21 | 3.50E-03 |
| <b>NFIX</b>     | 2.26 | 9.40E-03 | b.t. | n.s.     |
| <b>NPM1</b>     | 2.26 | 2.28E-02 | b.t. | n.s.     |
| <b>PLTP</b>     | 2.26 | 4.04E-02 | b.t. | n.s.     |
| <b>HELLS</b>    | 2.25 | 4.10E-03 | 2.97 | 9.00E-04 |
| <b>USP12</b>    | 2.25 | 2.76E-02 | 2.09 | 1.14E-02 |
| <b>MCTS1</b>    | 2.24 | 2.26E-02 | b.t. | n.s.     |
| <b>SLC20A1</b>  | 2.24 | 4.30E-03 | 2.28 | 5.90E-03 |
| <b>TUBE1</b>    | 2.24 | 6.20E-03 | b.t. | n.s.     |
| <b>ZDHHC12</b>  | 2.24 | 4.55E-02 | b.t. | n.s.     |
| <b>ORC3</b>     | 2.23 | 5.96E-05 | 2.06 | 8.00E-04 |
| <b>DNAAF5</b>   | 2.22 | 8.00E-03 | b.t. | n.s.     |
| <b>SLC25A11</b> | 2.22 | 1.60E-02 | b.t. | n.s.     |

|                |      |          |      |          |
|----------------|------|----------|------|----------|
| CHCHD3         | 2.21 | 2.64E-02 | b.t. | n.s.     |
| ETF1           | 2.21 | 1.07E-02 | b.t. | n.s.     |
| GADD45B        | 2.21 | 3.00E-03 | 2.37 | 9.00E-03 |
| MFSD10         | 2.21 | 3.69E-02 | b.t. | n.s.     |
| NTMT1          | 2.21 | 4.82E-02 | b.t. | n.s.     |
| TRMT10A        | 2.21 | 1.00E-03 | 2.16 | 3.82E-05 |
| SEC11C         | 2.2  | 1.70E-03 | 2.53 | 7.20E-03 |
| TET3           | 2.2  | 6.70E-03 | 1.87 | 4.40E-03 |
| UBR5           | 2.2  | 2.56E-02 | b.t. | n.s.     |
| RPL36A-HNRNPH2 | 2.19 | 1.97E-02 | b.t. | n.s.     |
| CFLAR          | 2.19 | 7.50E-03 | 2.53 | 9.30E-03 |
| CLRN1          | 2.19 | 2.10E-03 | b.t. | n.s.     |
| EIF2B3         | 2.19 | 1.73E-02 | b.t. | n.s.     |
| ELAC2          | 2.19 | 3.53E-02 | b.t. | n.s.     |
| AVEN           | 2.18 | 1.49E-02 | b.t. | n.s.     |
| CSTF2          | 2.18 | 2.73E-02 | b.t. | n.s.     |
| ZSWIM4         | 2.18 | 3.00E-03 | 2.64 | 1.30E-03 |
| RPS6KA1        | 2.17 | 3.30E-03 | 2.1  | 2.07E-02 |
| CCT2           | 2.17 | 4.72E-02 | b.t. | n.s.     |
| CNOT11         | 2.17 | 4.20E-03 | b.t. | n.s.     |
| MCUR1          | 2.17 | 4.45E-02 | b.t. | n.s.     |
| TMEM205        | 2.17 | 1.33E-02 | 1.55 | 1.72E-02 |
| ZBTB7B         | 2.17 | 2.78E-02 | 1.94 | 3.80E-02 |
| CENPH          | 2.16 | 1.47E-02 | b.t. | n.s.     |
| PPP1R7         | 2.16 | 2.30E-02 | b.t. | n.s.     |
| NCBP1          | 2.15 | 2.50E-03 | 2    | 2.00E-03 |
| RPL36A         | 2.15 | 1.82E-02 | b.t. | n.s.     |
| TUBB           | 2.15 | 2.47E-02 | b.t. | n.s.     |
| YWHAE          | 2.15 | 3.38E-02 | b.t. | n.s.     |

|         |      |          |      |          |
|---------|------|----------|------|----------|
| EIF3I   | 2.14 | 4.78E-02 | b.t. | n.s.     |
| KPNA2   | 2.14 | 3.67E-02 | b.t. | n.s.     |
| TARS    | 2.14 | 3.60E-03 | b.t. | n.s.     |
| WDR4    | 2.14 | 1.12E-02 | b.t. | n.s.     |
| DNAL1   | 2.13 | 4.74E-02 | b.t. | n.s.     |
| FASTKD1 | 2.13 | 8.00E-04 | 1.65 | 7.80E-03 |
| GTDC1   | 2.13 | 1.20E-03 | 2.04 | 4.10E-03 |
| INTS9   | 2.12 | 1.30E-03 | 1.85 | 8.70E-03 |
| ZNF442  | 2.12 | 1.50E-03 | 3    | 6.00E-04 |
| ARID5A  | 2.11 | 1.60E-02 | 2.37 | 1.00E-02 |
| NUP58   | 2.11 | 1.30E-03 | 1.79 | 5.50E-03 |
| OTUD7B  | 2.11 | 1.50E-03 | 2.66 | 3.50E-03 |
| SLC43A1 | 2.11 | 4.51E-02 | b.t. | n.s.     |
| CCDC6   | 2.1  | 9.20E-03 | 2.03 | 2.13E-02 |
| COQ3    | 2.1  | 3.93E-02 | b.t. | n.s.     |
| PARK7   | 2.1  | 1.27E-02 | b.t. | n.s.     |
| TFDP2   | 2.1  | 2.02E-02 | 2.2  | 5.80E-03 |
| CTSC    | 2.09 | 2.77E-02 | b.t. | n.s.     |
| KIF1C   | 2.09 | 1.90E-03 | 2.13 | 7.70E-03 |
| PPID    | 2.09 | 7.60E-03 | b.t. | n.s.     |
| PTRH1   | 2.09 | 1.89E-02 | b.t. | n.s.     |
| HMGA1   | 2.08 | 4.81E-02 | b.t. | n.s.     |
| VCP     | 2.08 | 4.80E-03 | b.t. | n.s.     |
| CCT8    | 2.07 | 4.79E-02 | b.t. | n.s.     |
| HENMT1  | 2.07 | 3.10E-03 | 1.74 | 4.96E-02 |
| VASP    | 2.07 | 4.51E-02 | b.t. | n.s.     |
| XPOT    | 2.07 | 8.90E-03 | b.t. | n.s.     |
| RPL26L1 | 2.06 | 2.72E-02 | b.t. | n.s.     |
| MRRF    | 2.06 | 4.40E-02 | b.t. | n.s.     |

|         |      |          |      |          |
|---------|------|----------|------|----------|
| ACBD6   | 2.05 | 2.70E-02 | b.t. | n.s.     |
| DARS    | 2.05 | 4.20E-03 | 2.13 | 7.40E-03 |
| GSS     | 2.05 | 1.56E-02 | b.t. | n.s.     |
| TFDP1   | 2.05 | 3.81E-02 | b.t. | n.s.     |
| WDR3    | 2.05 | 3.36E-02 | b.t. | n.s.     |
| GPI     | 2.04 | 1.90E-02 | b.t. | n.s.     |
| RFC4    | 2.04 | 2.04E-02 | b.t. | n.s.     |
| XPO1    | 2.04 | 7.20E-03 | b.t. | n.s.     |
| ZPR1    | 2.04 | 5.80E-03 | b.t. | n.s.     |
| APRT    | 2.03 | 3.65E-02 | b.t. | n.s.     |
| S100A14 | 2.03 | 8.10E-03 | 2.11 | 3.08E-02 |
| ABCB6   | 2.02 | 8.70E-03 | b.t. | n.s.     |
| CLEC12A | 2.02 | 2.40E-03 | b.t. | n.s.     |
| PEX3    | 2.02 | 4.00E-02 | b.t. | n.s.     |
| RBBP9   | 2.02 | 6.30E-03 | 1.71 | 3.50E-03 |
| RBM39   | 2.02 | 6.60E-03 | b.t. | n.s.     |
| CHPF    | 2.01 | 2.80E-03 | b.t. | n.s.     |
| PRMT5   | 2.01 | 4.97E-02 | b.t. | n.s.     |
| COA1    | 2    | 1.00E-02 | b.t. | n.s.     |
| CSE1L   | 2    | 1.40E-02 | b.t. | n.s.     |
| VBP1    | 2    | 2.46E-02 | b.t. | n.s.     |
| FAM162A | 1.99 | 4.66E-02 | b.t. | n.s.     |
| SMS     | 1.99 | 3.35E-02 | b.t. | n.s.     |
| WDR18   | 1.99 | 4.71E-02 | b.t. | n.s.     |
| EFHD2   | 1.98 | 1.74E-02 | b.t. | n.s.     |
| GARS    | 1.97 | 7.80E-03 | b.t. | n.s.     |
| NBEAL2  | 1.97 | 3.12E-02 | 2.17 | 2.47E-02 |
| PARVB   | 1.97 | 2.25E-02 | b.t. | n.s.     |
| HMMR    | 1.96 | 4.10E-03 | b.t. | n.s.     |

|                 |      |          |      |          |
|-----------------|------|----------|------|----------|
| <b>TIMM17A</b>  | 1.96 | 3.94E-02 | b.t. | n.s.     |
| <b>AEN</b>      | 1.95 | 2.26E-02 | 2.08 | 9.80E-03 |
| <b>CPNE2</b>    | 1.95 | 4.06E-02 | b.t. | n.s.     |
| <b>MLH1</b>     | 1.95 | 1.90E-03 | b.t. | n.s.     |
| <b>PSMD7</b>    | 1.95 | 2.38E-02 | b.t. | n.s.     |
| <b>SEC61A1</b>  | 1.95 | 1.96E-02 | b.t. | n.s.     |
| <b>ALG10B</b>   | 1.94 | 9.10E-03 | b.t. | n.s.     |
| <b>WDR77</b>    | 1.94 | 4.24E-02 | b.t. | n.s.     |
| <b>ACOT7</b>    | 1.93 | 9.70E-03 | b.t. | n.s.     |
| <b>CHCHD10</b>  | 1.93 | 2.55E-02 | b.t. | n.s.     |
| <b>OLA1</b>     | 1.93 | 8.20E-03 | b.t. | n.s.     |
| <b>VPS52</b>    | 1.93 | 2.36E-02 | b.t. | n.s.     |
| <b>DDX18</b>    | 1.92 | 1.33E-02 | b.t. | n.s.     |
| <b>EIF4H</b>    | 1.92 | 1.15E-02 | 1.76 | 1.09E-02 |
| <b>KIAA0391</b> | 1.92 | 2.99E-02 | b.t. | n.s.     |
| <b>OSBPL9</b>   | 1.92 | 2.30E-03 | 1.59 | 1.47E-02 |
| <b>PLLP</b>     | 1.92 | 6.85E-05 | 1.82 | 1.00E-03 |
| <b>PSMD1</b>    | 1.92 | 9.50E-03 | b.t. | n.s.     |
| <b>RPS17</b>    | 1.92 | 4.62E-02 | b.t. | n.s.     |
| <b>SF3B3</b>    | 1.92 | 1.87E-02 | b.t. | n.s.     |
| <b>TPM4</b>     | 1.92 | 3.67E-02 | b.t. | n.s.     |
| <b>GSTCD</b>    | 1.91 | 2.81E-02 | b.t. | n.s.     |
| <b>PSMD2</b>    | 1.91 | 7.20E-03 | b.t. | n.s.     |
| <b>RAB21</b>    | 1.91 | 1.42E-02 | b.t. | n.s.     |
| <b>USP46</b>    | 1.91 | 1.54E-02 | b.t. | n.s.     |
| <b>ZNF805</b>   | 1.91 | 3.30E-03 | 1.72 | 2.80E-03 |
| <b>EIF2A</b>    | 1.9  | 2.38E-02 | b.t. | n.s.     |
| <b>HEATR1</b>   | 1.9  | 4.39E-02 | 2.38 | 2.18E-02 |
| <b>OGFOD1</b>   | 1.9  | 1.64E-02 | b.t. | n.s.     |

|          |      |          |      |          |
|----------|------|----------|------|----------|
| PGLS     | 1.9  | 1.52E-02 | b.t. | n.s.     |
| PSMD13   | 1.9  | 3.18E-02 | b.t. | n.s.     |
| RGS7BP   | 1.9  | 7.40E-03 | b.t. | n.s.     |
| THOP1    | 1.9  | 8.40E-03 | 1.63 | 2.72E-02 |
| VAR5     | 1.9  | 1.70E-03 | b.t. | n.s.     |
| VDAC3    | 1.9  | 1.23E-02 | b.t. | n.s.     |
| BCCIP    | 1.89 | 3.30E-02 | b.t. | n.s.     |
| IRAK1BP1 | 1.89 | 6.00E-03 | 1.97 | 1.31E-02 |
| PFN1     | 1.89 | 1.70E-02 | b.t. | n.s.     |
| PPRC1    | 1.89 | 4.92E-02 | b.t. | n.s.     |
| RAD18    | 1.89 | 1.50E-03 | 1.75 | 1.50E-03 |
| TARBP1   | 1.89 | 4.51E-02 | b.t. | n.s.     |
| HMBS     | 1.88 | 2.24E-02 | b.t. | n.s.     |
| FPGS     | 1.88 | 5.20E-03 | b.t. | n.s.     |
| ERCC2    | 1.87 | 3.80E-03 | b.t. | n.s.     |
| MAGI3    | 1.87 | 7.70E-03 | b.t. | n.s.     |
| CCDC167  | 1.86 | 1.12E-02 | b.t. | n.s.     |
| RCAN2    | 1.86 | 4.50E-03 | 1.91 | 6.00E-04 |
| ARHGEF2  | 1.86 | 6.50E-03 | 2.27 | 4.00E-04 |
| CLDN7    | 1.86 | 9.40E-03 | b.t. | n.s.     |
| EXOSC1   | 1.86 | 4.70E-02 | b.t. | n.s.     |
| TMEM161A | 1.85 | 4.00E-03 | b.t. | n.s.     |
| ARPC2    | 1.84 | 3.70E-03 | b.t. | n.s.     |
| ATF4     | 1.84 | 3.66E-02 | b.t. | n.s.     |
| IRF5     | 1.84 | 3.18E-02 | 2.28 | 2.26E-02 |
| RALA     | 1.84 | 4.88E-02 | b.t. | n.s.     |
| SLC16A6  | 1.84 | 2.95E-02 | b.t. | n.s.     |
| AMMECR1L | 1.83 | 5.10E-03 | 1.86 | 3.50E-03 |
| GALE     | 1.83 | 4.75E-02 | b.t. | n.s.     |

|          |      |          |      |          |
|----------|------|----------|------|----------|
| KNSTRN   | 1.83 | 1.82E-02 | b.t. | n.s.     |
| MAPRE3   | 1.83 | 9.70E-03 | b.t. | n.s.     |
| MED27    | 1.83 | 2.45E-02 | b.t. | n.s.     |
| RRP12    | 1.83 | 4.25E-02 | b.t. | n.s.     |
| UQCRC2   | 1.83 | 1.65E-02 | b.t. | n.s.     |
| DNAJC21  | 1.82 | 2.26E-02 | b.t. | n.s.     |
| FANCD2   | 1.82 | 5.00E-04 | 2.22 | 5.00E-04 |
| NAP1L1   | 1.82 | 9.50E-03 | b.t. | n.s.     |
| NFE2L1   | 1.82 | 3.82E-02 | b.t. | n.s.     |
| PSMC6    | 1.82 | 2.04E-02 | b.t. | n.s.     |
| SLC25A17 | 1.82 | 2.91E-02 | b.t. | n.s.     |
| TMEM165  | 1.82 | 2.95E-02 | b.t. | n.s.     |
| GPAM     | 1.81 | 3.39E-02 | 1.56 | 2.28E-02 |
| IFFO2    | 1.81 | 9.67E-05 | 2.32 | 2.00E-04 |
| TEX10    | 1.81 | 6.60E-03 | b.t. | n.s.     |
| KDM4D    | 1.8  | 3.23E-02 | b.t. | n.s.     |
| ALDH1B1  | 1.8  | 2.09E-02 | b.t. | n.s.     |
| KIAA1143 | 1.8  | 3.47E-02 | b.t. | n.s.     |
| TXN      | 1.8  | 1.58E-02 | b.t. | n.s.     |
| DDX20    | 1.78 | 5.40E-03 | b.t. | n.s.     |
| GEMIN8   | 1.78 | 2.71E-02 | 2.66 | 4.00E-03 |
| IFT46    | 1.78 | 1.96E-02 | b.t. | n.s.     |
| IZUMO1   | 1.78 | 6.90E-03 | b.t. | n.s.     |
| RCN1     | 1.78 | 1.58E-02 | b.t. | n.s.     |
| C15orf41 | 1.77 | 2.71E-02 | b.t. | n.s.     |
| NDUFA7   | 1.77 | 3.69E-02 | b.t. | n.s.     |
| NDUFV3   | 1.77 | 2.93E-02 | b.t. | n.s.     |
| NUP188   | 1.77 | 2.31E-02 | b.t. | n.s.     |
| DARS2    | 1.76 | 4.31E-02 | b.t. | n.s.     |

|         |      |          |      |          |
|---------|------|----------|------|----------|
| MRPL12  | 1.76 | 4.65E-02 | b.t. | n.s.     |
| SMG9    | 1.76 | 8.00E-03 | 2.05 | 4.00E-04 |
| KPNA3   | 1.75 | 3.51E-02 | b.t. | n.s.     |
| MTRFR1L | 1.75 | 1.42E-02 | 1.94 | 4.20E-03 |
| NONO    | 1.75 | 2.47E-02 | b.t. | n.s.     |
| PADI6   | 1.75 | 3.38E-02 | b.t. | n.s.     |
| PMPCB   | 1.75 | 2.23E-02 | b.t. | n.s.     |
| PPIL1   | 1.75 | 2.22E-02 | b.t. | n.s.     |
| SAAL1   | 1.75 | 2.80E-02 | b.t. | n.s.     |
| ALDH4A1 | 1.74 | 3.04E-02 | 1.81 | 1.52E-02 |
| BUD31   | 1.74 | 4.87E-02 | b.t. | n.s.     |
| CENPE   | 1.74 | 1.80E-03 | b.t. | n.s.     |
| GLUD1   | 1.74 | 3.40E-03 | b.t. | n.s.     |
| LIG3    | 1.74 | 1.21E-02 | b.t. | n.s.     |
| LMAN1   | 1.74 | 1.45E-02 | b.t. | n.s.     |
| MRPL35  | 1.74 | 1.45E-02 | b.t. | n.s.     |
| MRPS31  | 1.74 | 1.89E-02 | b.t. | n.s.     |
| NUDT19  | 1.74 | 4.54E-02 | b.t. | n.s.     |
| SCFD2   | 1.74 | 3.40E-02 | b.t. | n.s.     |
| CLTC    | 1.73 | 5.30E-03 | b.t. | n.s.     |
| DTX4    | 1.73 | 2.65E-02 | b.t. | n.s.     |
| EMILIN2 | 1.73 | 1.71E-02 | b.t. | n.s.     |
| MTHFD1  | 1.73 | 1.70E-03 | 2.24 | 1.39E-02 |
| POLDIP2 | 1.73 | 3.38E-02 | b.t. | n.s.     |
| ANP32E  | 1.72 | 3.39E-02 | b.t. | n.s.     |
| FAM98B  | 1.72 | 7.60E-03 | b.t. | n.s.     |
| MCCC2   | 1.72 | 2.75E-02 | 1.85 | 2.30E-02 |
| MRPL52  | 1.72 | 2.89E-02 | b.t. | n.s.     |
| NT5C    | 1.72 | 3.18E-02 | 1.9  | 3.99E-02 |

|                 |      |          |      |          |
|-----------------|------|----------|------|----------|
| <b>SNX24</b>    | 1.72 | 2.13E-02 | b.t. | n.s.     |
| <b>TLL4</b>     | 1.72 | 8.20E-03 | b.t. | n.s.     |
| <b>VDAC2</b>    | 1.72 | 2.47E-02 | b.t. | n.s.     |
| <b>ZYX</b>      | 1.72 | 1.04E-02 | 1.99 | 2.04E-02 |
| <b>E2F3</b>     | 1.71 | 9.10E-03 | b.t. | n.s.     |
| <b>MNAT1</b>    | 1.71 | 2.35E-02 | b.t. | n.s.     |
| <b>NCLN</b>     | 1.71 | 2.92E-02 | b.t. | n.s.     |
| <b>YIPF1</b>    | 1.71 | 9.50E-03 | b.t. | n.s.     |
| <b>HK2</b>      | 1.7  | 1.86E-02 | b.t. | n.s.     |
| <b>HTRA2</b>    | 1.7  | 2.72E-02 | 2.07 | 3.40E-03 |
| <b>MYO5A</b>    | 1.7  | 1.46E-02 | b.t. | n.s.     |
| <b>OTULIN</b>   | 1.7  | 3.26E-02 | 1.93 | 1.37E-02 |
| <b>UBL7</b>     | 1.7  | 3.63E-02 | 1.77 | 2.43E-02 |
| <b>CANX</b>     | 1.69 | 3.59E-02 | b.t. | n.s.     |
| <b>NARS</b>     | 1.69 | 4.63E-02 | b.t. | n.s.     |
| <b>TMED3</b>    | 1.69 | 7.60E-03 | b.t. | n.s.     |
| <b>CDS1</b>     | 1.68 | 1.10E-03 | b.t. | n.s.     |
| <b>ERCC1</b>    | 1.68 | 3.12E-02 | b.t. | n.s.     |
| <b>HNRNPDL</b>  | 1.68 | 2.20E-02 | b.t. | n.s.     |
| <b>POP1</b>     | 1.68 | 1.77E-02 | 1.56 | 2.51E-02 |
| <b>RHBDF2</b>   | 1.68 | 8.80E-03 | 1.71 | 1.81E-02 |
| <b>STK38L</b>   | 1.68 | 2.10E-02 | 1.72 | 1.88E-02 |
| <b>MPHOSPH6</b> | 1.67 | 3.26E-02 | b.t. | n.s.     |
| <b>SMARCAD1</b> | 1.67 | 1.57E-02 | b.t. | n.s.     |
| <b>STKLD1</b>   | 1.67 | 3.70E-03 | b.t. | n.s.     |
| <b>TNIP2</b>    | 1.67 | 1.13E-02 | b.t. | n.s.     |
| <b>UHRF1BP1</b> | 1.67 | 1.20E-02 | b.t. | n.s.     |
| <b>HSPH1</b>    | 1.66 | 1.01E-02 | b.t. | n.s.     |
| <b>NDUFS4</b>   | 1.66 | 4.77E-02 | b.t. | n.s.     |

|          |      |          |      |          |
|----------|------|----------|------|----------|
| PPME1    | 1.66 | 2.07E-02 | b.t. | n.s.     |
| TFG      | 1.66 | 3.54E-02 | b.t. | n.s.     |
| GMPPB    | 1.65 | 2.91E-02 | 2.17 | 4.77E-02 |
| MTMR4    | 1.65 | 3.50E-02 | 1.88 | 3.60E-03 |
| NDUFV1   | 1.65 | 6.00E-03 | b.t. | n.s.     |
| PLCB3    | 1.65 | 1.40E-03 | 1.53 | 8.00E-03 |
| CHMP4B   | 1.64 | 3.69E-02 | b.t. | n.s.     |
| FAN1     | 1.64 | 2.81E-02 | b.t. | n.s.     |
| SLC39A1  | 1.64 | 2.00E-04 | b.t. | n.s.     |
| SMAP2    | 1.64 | 1.40E-03 | 1.63 | 7.80E-03 |
| SPIB     | 1.64 | 1.74E-02 | b.t. | n.s.     |
| TMEM168  | 1.64 | 9.60E-03 | b.t. | n.s.     |
| CLPB     | 1.63 | 7.10E-03 | b.t. | n.s.     |
| FCF1     | 1.63 | 4.80E-02 | b.t. | n.s.     |
| NUF2     | 1.63 | 4.97E-02 | b.t. | n.s.     |
| PAFAH2   | 1.63 | 5.70E-03 | b.t. | n.s.     |
| SLC39A6  | 1.63 | 4.68E-02 | b.t. | n.s.     |
| SPDL1    | 1.63 | 2.16E-02 | b.t. | n.s.     |
| FITM2    | 1.62 | 9.70E-03 | b.t. | n.s.     |
| GCSH     | 1.62 | 1.77E-02 | b.t. | n.s.     |
| NMD3     | 1.62 | 3.73E-02 | b.t. | n.s.     |
| WNK3     | 1.62 | 3.81E-02 | b.t. | n.s.     |
| ZC3HAV1L | 1.62 | 2.55E-02 | b.t. | n.s.     |
| DAP      | 1.61 | 4.20E-03 | b.t. | n.s.     |
| IPPK     | 1.61 | 7.30E-03 | b.t. | n.s.     |
| MARVELD1 | 1.61 | 2.75E-02 | b.t. | n.s.     |
| MBD2     | 1.61 | 2.34E-02 | b.t. | n.s.     |
| PPP2R5D  | 1.61 | 2.15E-02 | b.t. | n.s.     |
| DDAH1    | 1.6  | 4.74E-02 | b.t. | n.s.     |

|            |      |          |      |          |
|------------|------|----------|------|----------|
| GTPBP4     | 1.6  | 4.96E-02 | b.t. | n.s.     |
| TRAF3      | 1.6  | 1.71E-02 | b.t. | n.s.     |
| H1FOO      | 1.59 | 7.00E-04 | b.t. | n.s.     |
| SURF2      | 1.59 | 4.31E-02 | b.t. | n.s.     |
| C3orf33    | 1.59 | 2.58E-02 | b.t. | n.s.     |
| DYNC2LI1   | 1.59 | 4.81E-02 | b.t. | n.s.     |
| FSIP1      | 1.59 | 4.70E-03 | 1.63 | 1.46E-02 |
| PLD2       | 1.59 | 3.34E-02 | b.t. | n.s.     |
| SRSF7      | 1.59 | 3.31E-02 | b.t. | n.s.     |
| KNG1       | 1.58 | 3.77E-02 | b.t. | n.s.     |
| ZBTB5      | 1.58 | 2.40E-02 | 2.63 | 1.20E-03 |
| MOSPD2     | 1.58 | 2.84E-02 | b.t. | n.s.     |
| NOC2L      | 1.58 | 2.90E-02 | b.t. | n.s.     |
| SEC24A     | 1.58 | 2.73E-02 | b.t. | n.s.     |
| SLC1A3     | 1.58 | 4.31E-02 | b.t. | n.s.     |
| TMOD1      | 1.58 | 3.30E-02 | b.t. | n.s.     |
| UBA5       | 1.58 | 3.41E-02 | b.t. | n.s.     |
| ZMIZ1      | 1.58 | 2.62E-02 | b.t. | n.s.     |
| CSGALNACT1 | 1.57 | 1.97E-02 | b.t. | n.s.     |
| FAH        | 1.57 | 1.07E-02 | b.t. | n.s.     |
| GABRG3     | 1.57 | 3.64E-02 | b.t. | n.s.     |
| MCAT       | 1.57 | 3.91E-02 | b.t. | n.s.     |
| PTDSS2     | 1.57 | 2.81E-02 | b.t. | n.s.     |
| RTCA       | 1.57 | 1.64E-02 | b.t. | n.s.     |
| IDE        | 1.56 | 1.01E-02 | b.t. | n.s.     |
| NFATC2     | 1.56 | 4.56E-02 | 1.98 | 4.54E-02 |
| PGM2       | 1.56 | 2.10E-02 | b.t. | n.s.     |
| ST20       | 1.56 | 1.92E-02 | b.t. | n.s.     |
| DDX53      | 1.55 | 3.90E-02 | b.t. | n.s.     |

|         |      |          |      |          |
|---------|------|----------|------|----------|
| GRPR    | 1.55 | 1.60E-02 | b.t. | n.s.     |
| ASGR1   | 1.55 | 1.74E-02 | b.t. | n.s.     |
| IPOS    | 1.55 | 4.80E-03 | b.t. | n.s.     |
| MLLT11  | 1.55 | 1.81E-02 | 1.82 | 4.20E-03 |
| NRAS    | 1.55 | 4.21E-02 | b.t. | n.s.     |
| FMR1NB  | 1.54 | 4.50E-03 | b.t. | n.s.     |
| AP2A1   | 1.54 | 2.34E-02 | b.t. | n.s.     |
| FBXO22  | 1.54 | 4.46E-02 | b.t. | n.s.     |
| OTUD6B  | 1.54 | 1.29E-02 | b.t. | n.s.     |
| YARS    | 1.54 | 1.21E-02 | b.t. | n.s.     |
| DLGAP5  | 1.53 | 3.35E-02 | 1.54 | 1.97E-02 |
| NR1I2   | 1.53 | 4.43E-02 | b.t. | n.s.     |
| SOC57   | 1.53 | 1.12E-02 | b.t. | n.s.     |
| ABCG2   | 1.52 | 3.70E-03 | b.t. | n.s.     |
| ADGRA3  | 1.52 | 3.58E-02 | b.t. | n.s.     |
| CNBD1   | 1.52 | 1.34E-02 | b.t. | n.s.     |
| CYP26A1 | 1.52 | 2.32E-02 | b.t. | n.s.     |
| FAF2    | 1.52 | 1.18E-02 | 1.5  | 2.23E-02 |
| FAM19A5 | 1.52 | 3.90E-03 | b.t. | n.s.     |
| FUOM    | 1.52 | 2.32E-02 | b.t. | n.s.     |
| HSPA13  | 1.52 | 2.96E-02 | b.t. | n.s.     |
| MMP7    | 1.52 | 2.21E-02 | b.t. | n.s.     |
| PRRT3   | 1.52 | 9.86E-05 | 1.6  | 6.00E-04 |
| FABP12  | 1.51 | 4.03E-02 | b.t. | n.s.     |
| QRFP    | 1.51 | 1.20E-03 | b.t. | n.s.     |
| COPB2   | 1.51 | 4.29E-02 | b.t. | n.s.     |
| GALNT1  | 1.51 | 2.49E-02 | b.t. | n.s.     |
| METAP1D | 1.51 | 4.88E-02 | b.t. | n.s.     |
| PSPH    | 1.51 | 4.71E-02 | b.t. | n.s.     |

|          |       |          |       |          |
|----------|-------|----------|-------|----------|
| RPS24    | 1.51  | 4.73E-02 | b.t.  | n.s.     |
| SMAD7    | 1.51  | 4.49E-02 | b.t.  | n.s.     |
| CBFA2T3  | 1.5   | 2.49E-02 | b.t.  | n.s.     |
| PCLO     | 1.5   | 4.07E-02 | b.t.  | n.s.     |
| TNKS1BP1 | 1.5   | 4.85E-02 | 1.63  | 1.70E-02 |
| UBE2I    | 1.5   | 2.25E-02 | b.t.  | n.s.     |
| ACSS1    | -1.5  | 5.00E-04 | -1.66 | 2.90E-03 |
| ARFIP1   | -1.5  | 3.27E-02 | b.t.  | n.s.     |
| AVIL     | -1.5  | 3.17E-02 | b.t.  | n.s.     |
| BNIPL    | -1.5  | 7.40E-03 | b.t.  | n.s.     |
| ZNF792   | -1.5  | 1.75E-02 | b.t.  | n.s.     |
| ZNRF2    | -1.5  | 3.36E-02 | b.t.  | n.s.     |
| CPNE3    | -1.51 | 5.90E-03 | -1.74 | 8.60E-03 |
| KIF18A   | -1.51 | 4.48E-02 | b.t.  | n.s.     |
| MED13    | -1.51 | 3.96E-02 | b.t.  | n.s.     |
| PTPRG    | -1.51 | 7.20E-03 | b.t.  | n.s.     |
| SHC1     | -1.51 | 2.90E-02 | -1.96 | 2.20E-03 |
| ZBTB18   | -1.51 | 4.11E-02 | b.t.  | n.s.     |
| ZMYM2    | -1.51 | 3.51E-02 | b.t.  | n.s.     |
| MSL2     | -1.52 | 1.99E-02 | b.t.  | n.s.     |
| CDC73    | -1.52 | 4.77E-02 | b.t.  | n.s.     |
| CHODL    | -1.52 | 1.00E-03 | b.t.  | n.s.     |
| CRY2     | -1.52 | 3.50E-02 | b.t.  | n.s.     |
| CTDSP1   | -1.52 | 4.40E-03 | b.t.  | n.s.     |
| MIS18BP1 | -1.52 | 2.98E-02 | b.t.  | n.s.     |
| RCBTB2   | -1.52 | 3.29E-02 | b.t.  | n.s.     |
| RIPK3    | -1.52 | 3.25E-02 | b.t.  | n.s.     |
| TM2D3    | -1.52 | 3.88E-02 | b.t.  | n.s.     |
| TTBK2    | -1.52 | 2.30E-03 | -1.73 | 6.30E-03 |

|                 |       |          |       |          |
|-----------------|-------|----------|-------|----------|
| <b>FAM209A</b>  | -1.53 | 2.46E-02 | b.t.  | n.s.     |
| <b>AGPAT4</b>   | -1.53 | 2.60E-02 | b.t.  | n.s.     |
| <b>MICU1</b>    | -1.53 | 5.60E-03 | b.t.  | n.s.     |
| <b>TMEM59</b>   | -1.53 | 2.00E-03 | b.t.  | n.s.     |
| <b>ZNF236</b>   | -1.53 | 2.15E-02 | -2.07 | 9.00E-04 |
| <b>MLXIP</b>    | -1.54 | 3.26E-02 | b.t.  | n.s.     |
| <b>DMPK</b>     | -1.54 | 4.79E-02 | b.t.  | n.s.     |
| <b>HELQ</b>     | -1.54 | 3.90E-03 | b.t.  | n.s.     |
| <b>LHFPL2</b>   | -1.54 | 3.68E-02 | -1.74 | 1.07E-02 |
| <b>PFDN5</b>    | -1.54 | 2.17E-02 | b.t.  | n.s.     |
| <b>STXBP3</b>   | -1.54 | 3.92E-02 | b.t.  | n.s.     |
| <b>TBCEL</b>    | -1.54 | 3.59E-02 | b.t.  | n.s.     |
| <b>UEVLD</b>    | -1.54 | 3.55E-02 | b.t.  | n.s.     |
| <b>ACYP2</b>    | -1.55 | 3.81E-02 | b.t.  | n.s.     |
| <b>CDADC1</b>   | -1.55 | 4.50E-03 | b.t.  | n.s.     |
| <b>CREB1</b>    | -1.55 | 3.31E-02 | b.t.  | n.s.     |
| <b>CTSF</b>     | -1.55 | 9.20E-03 | b.t.  | n.s.     |
| <b>GCLC</b>     | -1.55 | 2.03E-02 | b.t.  | n.s.     |
| <b>HHEX</b>     | -1.55 | 2.94E-02 | b.t.  | n.s.     |
| <b>METTL21A</b> | -1.55 | 2.07E-02 | b.t.  | n.s.     |
| <b>NAA16</b>    | -1.55 | 2.55E-02 | b.t.  | n.s.     |
| <b>PNPLA2</b>   | -1.55 | 1.00E-04 | b.t.  | n.s.     |
| <b>USPL1</b>    | -1.55 | 6.00E-04 | -1.71 | 4.10E-03 |
| <b>ZIK1</b>     | -1.55 | 3.63E-02 | b.t.  | n.s.     |
| <b>C8orf44</b>  | -1.56 | 4.75E-02 | b.t.  | n.s.     |
| <b>ERVW-1</b>   | -1.56 | 1.85E-02 | b.t.  | n.s.     |
| <b>PHGR1</b>    | -1.56 | 4.50E-02 | b.t.  | n.s.     |
| <b>WHAMM</b>    | -1.56 | 4.40E-02 | b.t.  | n.s.     |
| <b>CCSAP</b>    | -1.57 | 2.60E-03 | b.t.  | n.s.     |

|          |       |          |       |          |
|----------|-------|----------|-------|----------|
| CD47     | -1.57 | 3.67E-02 | b.t.  | n.s.     |
| IQCF2    | -1.57 | 1.40E-02 | b.t.  | n.s.     |
| CARD8    | -1.58 | 8.60E-03 | b.t.  | n.s.     |
| SIN3A    | -1.58 | 2.50E-02 | b.t.  | n.s.     |
| ST7L     | -1.58 | 2.78E-02 | b.t.  | n.s.     |
| BTN3A3   | -1.59 | 9.80E-03 | b.t.  | n.s.     |
| FNDC3A   | -1.59 | 1.37E-02 | b.t.  | n.s.     |
| HERC3    | -1.59 | 2.40E-03 | b.t.  | n.s.     |
| NEK1     | -1.59 | 2.37E-02 | -1.78 | 3.08E-02 |
| RREB1    | -1.59 | 3.43E-02 | b.t.  | n.s.     |
| SFTP8    | -1.59 | 2.00E-04 | b.t.  | n.s.     |
| WDR91    | -1.59 | 2.81E-02 | b.t.  | n.s.     |
| LYSMD4   | -1.6  | 1.22E-02 | b.t.  | n.s.     |
| TSPYL1   | -1.6  | 1.44E-02 | b.t.  | n.s.     |
| ADSSL1   | -1.6  | 4.20E-02 | b.t.  | n.s.     |
| ATP6V1G1 | -1.6  | 2.20E-02 | b.t.  | n.s.     |
| CTDSPL2  | -1.6  | 3.81E-02 | b.t.  | n.s.     |
| EPC1     | -1.6  | 1.41E-02 | b.t.  | n.s.     |
| ERF      | -1.6  | 2.73E-02 | b.t.  | n.s.     |
| ETV6     | -1.6  | 3.72E-02 | b.t.  | n.s.     |
| GRIA1    | -1.6  | 2.99E-02 | b.t.  | n.s.     |
| PCCA     | -1.6  | 1.32E-02 | -1.68 | 5.40E-03 |
| RC3H1    | -1.6  | 1.89E-02 | b.t.  | n.s.     |
| RIC1     | -1.6  | 8.90E-03 | -1.95 | 7.40E-03 |
| STRIP1   | -1.6  | 3.60E-03 | b.t.  | n.s.     |
| ZNF200   | -1.6  | 4.35E-02 | b.t.  | n.s.     |
| ZNF836   | -1.6  | 2.66E-02 | -1.62 | 1.71E-02 |
| ATG4C    | -1.61 | 4.60E-02 | -1.93 | 4.26E-02 |
| INPP1    | -1.61 | 1.83E-02 | b.t.  | n.s.     |

|                 |       |          |       |          |
|-----------------|-------|----------|-------|----------|
| <b>MAN1B1</b>   | -1.61 | 4.46E-02 | b.t.  | n.s.     |
| <b>SNRNP48</b>  | -1.61 | 1.00E-02 | -1.66 | 1.11E-02 |
| <b>SYPL1</b>    | -1.61 | 1.20E-02 | b.t.  | n.s.     |
| <b>WIPF1</b>    | -1.61 | 7.00E-04 | -1.6  | 1.00E-03 |
| <b>BCL2L14</b>  | -1.62 | 1.83E-02 | b.t.  | n.s.     |
| <b>C12orf76</b> | -1.62 | 3.17E-02 | b.t.  | n.s.     |
| <b>C1orf56</b>  | -1.62 | 2.13E-02 | b.t.  | n.s.     |
| <b>CAMK2G</b>   | -1.62 | 2.03E-02 | -1.66 | 7.50E-03 |
| <b>GORASP1</b>  | -1.62 | 3.74E-02 | b.t.  | n.s.     |
| <b>KBTBD3</b>   | -1.62 | 4.75E-02 | -2.03 | 2.25E-02 |
| <b>MBD4</b>     | -1.62 | 1.37E-02 | b.t.  | n.s.     |
| <b>ZNF860</b>   | -1.62 | 1.05E-02 | b.t.  | n.s.     |
| <b>DGKD</b>     | -1.63 | 7.00E-03 | b.t.  | n.s.     |
| <b>ADPRM</b>    | -1.63 | 1.57E-02 | b.t.  | n.s.     |
| <b>CBX7</b>     | -1.63 | 1.01E-02 | b.t.  | n.s.     |
| <b>ECI2</b>     | -1.63 | 4.51E-02 | b.t.  | n.s.     |
| <b>FBXL4</b>    | -1.63 | 3.82E-02 | b.t.  | n.s.     |
| <b>MADD</b>     | -1.63 | 4.20E-03 | b.t.  | n.s.     |
| <b>NCOA3</b>    | -1.63 | 9.00E-04 | -1.52 | 9.00E-04 |
| <b>RIPK1</b>    | -1.63 | 2.30E-03 | b.t.  | n.s.     |
| <b>ABHD14A</b>  | -1.64 | 1.10E-03 | b.t.  | n.s.     |
| <b>ANKAR</b>    | -1.64 | 2.29E-02 | b.t.  | n.s.     |
| <b>ANKRA2</b>   | -1.64 | 4.05E-02 | b.t.  | n.s.     |
| <b>DECR1</b>    | -1.64 | 3.10E-02 | b.t.  | n.s.     |
| <b>RPRD2</b>    | -1.64 | 8.70E-03 | b.t.  | n.s.     |
| <b>TRABD2A</b>  | -1.64 | 2.36E-02 | -1.9  | 1.70E-03 |
| <b>PRKD3</b>    | -1.65 | 5.80E-03 | -2.14 | 8.00E-03 |
| <b>PTPN2</b>    | -1.65 | 2.65E-02 | b.t.  | n.s.     |
| <b>TMEM53</b>   | -1.65 | 4.59E-02 | b.t.  | n.s.     |

|         |       |          |       |          |
|---------|-------|----------|-------|----------|
| ZNF217  | -1.65 | 1.47E-02 | b.t.  | n.s.     |
| CLEC4A  | -1.66 | 1.94E-02 | b.t.  | n.s.     |
| PLEKHF1 | -1.66 | 7.50E-03 | -2.48 | 2.00E-04 |
| ARL11   | -1.66 | 4.26E-02 | b.t.  | n.s.     |
| CNOT8   | -1.66 | 1.24E-02 | b.t.  | n.s.     |
| PRKCZ   | -1.66 | 2.09E-02 | b.t.  | n.s.     |
| SH3BGRL | -1.66 | 4.69E-02 | b.t.  | n.s.     |
| SH3GLB2 | -1.66 | 3.03E-02 | -2.07 | 7.50E-03 |
| SLPI    | -1.66 | 2.95E-02 | b.t.  | n.s.     |
| ZNF610  | -1.66 | 2.23E-02 | -1.7  | 4.31E-02 |
| AMFR    | -1.67 | 4.00E-02 | b.t.  | n.s.     |
| CDK14   | -1.67 | 8.00E-03 | -1.93 | 4.09E-02 |
| CKAP2   | -1.67 | 3.75E-02 | b.t.  | n.s.     |
| FBXL14  | -1.67 | 1.40E-02 | -1.63 | 4.70E-02 |
| SAP130  | -1.67 | 1.74E-02 | b.t.  | n.s.     |
| CCNDBP1 | -1.68 | 6.30E-03 | b.t.  | n.s.     |
| CD55    | -1.68 | 8.90E-03 | b.t.  | n.s.     |
| FIP1L1  | -1.68 | 3.13E-02 | b.t.  | n.s.     |
| FOXO4   | -1.68 | 4.79E-02 | b.t.  | n.s.     |
| PLEKHA3 | -1.68 | 9.00E-04 | -1.73 | 5.60E-03 |
| ZKSCAN3 | -1.68 | 3.92E-02 | b.t.  | n.s.     |
| ITCH    | -1.69 | 4.44E-02 | b.t.  | n.s.     |
| RUNDG1  | -1.69 | 1.46E-02 | b.t.  | n.s.     |
| TMEM159 | -1.69 | 4.86E-02 | b.t.  | n.s.     |
| USP33   | -1.69 | 5.00E-04 | b.t.  | n.s.     |
| ANKIB1  | -1.7  | 6.00E-04 | -1.8  | 1.20E-03 |
| CGGBP1  | -1.7  | 7.20E-03 | b.t.  | n.s.     |
| HDAC7   | -1.7  | 1.13E-02 | b.t.  | n.s.     |
| KLHL32  | -1.7  | 1.00E-03 | b.t.  | n.s.     |

|          |       |          |       |          |
|----------|-------|----------|-------|----------|
| SLC1A7   | -1.7  | 3.10E-03 | b.t.  | n.s.     |
| WWC3     | -1.7  | 3.46E-02 | b.t.  | n.s.     |
| BRWD1    | -1.71 | 3.70E-02 | -1.73 | 3.13E-02 |
| HECTD2   | -1.71 | 3.03E-02 | -2.39 | 1.07E-02 |
| PCIF1    | -1.71 | 9.80E-03 | b.t.  | n.s.     |
| SNX30    | -1.71 | 4.24E-02 | -3.2  | 1.00E-04 |
| ZBTB49   | -1.71 | 2.00E-04 | b.t.  | n.s.     |
| ZFP82    | -1.71 | 5.00E-04 | b.t.  | n.s.     |
| ZNF184   | -1.71 | 6.30E-03 | b.t.  | n.s.     |
| HS3ST1   | -1.72 | 4.47E-02 | b.t.  | n.s.     |
| PDCL     | -1.72 | 3.00E-03 | b.t.  | n.s.     |
| AIDA     | -1.72 | 2.72E-02 | -2.77 | 9.00E-04 |
| C18orf25 | -1.72 | 4.17E-02 | b.t.  | n.s.     |
| C5orf56  | -1.72 | 1.75E-02 | -2.11 | 3.70E-03 |
| CAPN12   | -1.72 | 3.48E-02 | -1.59 | 1.44E-02 |
| FAM3C    | -1.72 | 2.54E-02 | b.t.  | n.s.     |
| IL12RB1  | -1.72 | 2.44E-02 | -3.01 | 9.00E-04 |
| MKRN1    | -1.72 | 1.01E-02 | b.t.  | n.s.     |
| NFX1     | -1.72 | 2.35E-02 | -1.5  | 2.49E-02 |
| SENP7    | -1.72 | 4.86E-02 | b.t.  | n.s.     |
| SETD2    | -1.72 | 4.44E-02 | b.t.  | n.s.     |
| TMEM80   | -1.72 | 2.17E-02 | b.t.  | n.s.     |
| TRIM14   | -1.72 | 2.95E-02 | b.t.  | n.s.     |
| ZKSCAN8  | -1.72 | 9.30E-03 | b.t.  | n.s.     |
| CAPN14   | -1.73 | 3.92E-02 | b.t.  | n.s.     |
| GTPBP1   | -1.73 | 7.30E-03 | b.t.  | n.s.     |
| KCTD21   | -1.73 | 3.47E-02 | b.t.  | n.s.     |
| ACP5     | -1.73 | 3.28E-02 | -5.17 | 3.42E-08 |
| KLK2     | -1.73 | 4.85E-02 | -1.61 | 5.00E-03 |

|          |       |          |       |          |
|----------|-------|----------|-------|----------|
| RNF13    | -1.73 | 3.85E-02 | b.t.  | n.s.     |
| SDHA     | -1.73 | 1.10E-03 | -1.86 | 1.30E-02 |
| ACADM    | -1.74 | 1.34E-02 | -1.94 | 8.20E-03 |
| ARSD     | -1.74 | 2.23E-02 | b.t.  | n.s.     |
| EPC2     | -1.74 | 6.10E-03 | b.t.  | n.s.     |
| L3MBTL3  | -1.74 | 3.38E-02 | -2.28 | 4.20E-03 |
| PARP3    | -1.74 | 2.58E-02 | b.t.  | n.s.     |
| AS3MT    | -1.75 | 2.12E-02 | b.t.  | n.s.     |
| ELF1     | -1.75 | 2.70E-03 | -1.87 | 2.80E-03 |
| FAM76B   | -1.75 | 4.57E-02 | b.t.  | n.s.     |
| METTL23  | -1.75 | 8.90E-03 | -1.59 | 1.12E-02 |
| SRGAP3   | -1.75 | 5.00E-04 | b.t.  | n.s.     |
| SYNRG    | -1.75 | 1.00E-04 | b.t.  | n.s.     |
| TBC1D5   | -1.75 | 3.59E-02 | b.t.  | n.s.     |
| EAF2     | -1.76 | 1.34E-02 | b.t.  | n.s.     |
| MBOAT1   | -1.76 | 4.64E-02 | b.t.  | n.s.     |
| S1PR4    | -1.76 | 5.00E-03 | b.t.  | n.s.     |
| CIITA    | -1.77 | 2.15E-02 | b.t.  | n.s.     |
| DMTF1    | -1.77 | 7.20E-03 | b.t.  | n.s.     |
| GNS      | -1.77 | 5.40E-03 | -2.03 | 1.23E-02 |
| NADSYN1  | -1.77 | 2.61E-02 | b.t.  | n.s.     |
| SNRK     | -1.77 | 4.00E-04 | b.t.  | n.s.     |
| VPS13B   | -1.77 | 6.20E-03 | b.t.  | n.s.     |
| ZNF83    | -1.77 | 1.49E-02 | b.t.  | n.s.     |
| DCLK2    | -1.78 | 1.46E-02 | b.t.  | n.s.     |
| DNAJC16  | -1.78 | 1.81E-02 | b.t.  | n.s.     |
| HP1BP3   | -1.78 | 9.80E-03 | -1.78 | 2.60E-02 |
| PPP2R5C  | -1.78 | 1.65E-02 | -1.8  | 1.74E-02 |
| SLC25A30 | -1.78 | 2.87E-02 | -1.66 | 1.94E-02 |

|          |       |          |       |          |
|----------|-------|----------|-------|----------|
| ZCCHC18  | -1.78 | 1.39E-02 | b.t.  | n.s.     |
| FBXO31   | -1.79 | 3.83E-02 | b.t.  | n.s.     |
| GSAP     | -1.79 | 2.47E-02 | -1.91 | 1.53E-02 |
| RAB33B   | -1.79 | 1.50E-03 | b.t.  | n.s.     |
| RBM5     | -1.79 | 5.43E-05 | b.t.  | n.s.     |
| RSBN1L   | -1.79 | 3.50E-03 | -2.03 | 5.00E-04 |
| AK9      | -1.8  | 1.41E-02 | b.t.  | n.s.     |
| FBXL17   | -1.8  | 5.90E-03 | -1.64 | 4.88E-02 |
| GOLGA8G  | -1.8  | 1.54E-02 | b.t.  | n.s.     |
| BBS9     | -1.81 | 1.85E-02 | b.t.  | n.s.     |
| CASP12   | -1.81 | 4.40E-03 | -2.03 | 1.20E-03 |
| ELK4     | -1.81 | 9.00E-04 | -1.73 | 1.10E-03 |
| FRS2     | -1.81 | 3.78E-02 | b.t.  | n.s.     |
| GSTK1    | -1.81 | 2.30E-02 | b.t.  | n.s.     |
| HIPK3    | -1.81 | 6.80E-03 | -1.8  | 1.34E-02 |
| HIVEP2   | -1.81 | 1.50E-03 | b.t.  | n.s.     |
| MLKL     | -1.81 | 3.84E-02 | -3.87 | 6.40E-03 |
| NSUN6    | -1.81 | 9.00E-04 | -2.14 | 1.30E-03 |
| USP25    | -1.81 | 2.00E-03 | -1.76 | 1.72E-02 |
| ZNF852   | -1.81 | 6.00E-04 | -1.58 | 1.69E-02 |
| CEACAM21 | -1.82 | 3.60E-03 | b.t.  | n.s.     |
| CNDP2    | -1.82 | 3.35E-02 | b.t.  | n.s.     |
| KHDRBS2  | -1.82 | 2.30E-02 | b.t.  | n.s.     |
| PQLC3    | -1.82 | 2.20E-03 | b.t.  | n.s.     |
| ZMYND11  | -1.82 | 3.63E-02 | -1.63 | 4.14E-02 |
| ARHGAP15 | -1.83 | 7.50E-03 | b.t.  | n.s.     |
| ARHGAP5  | -1.83 | 4.40E-03 | -2.06 | 2.90E-03 |
| FIG4     | -1.83 | 2.20E-02 | b.t.  | n.s.     |
| ACBD5    | -1.84 | 8.20E-05 | b.t.  | n.s.     |

|                 |       |          |       |          |
|-----------------|-------|----------|-------|----------|
| <b>DOCK9</b>    | -1.84 | 4.50E-02 | b.t.  | n.s.     |
| <b>GFOD1</b>    | -1.84 | 4.30E-03 | -1.86 | 6.70E-03 |
| <b>MGAT5</b>    | -1.84 | 2.19E-02 | b.t.  | n.s.     |
| <b>QPCT</b>     | -1.84 | 5.90E-03 | -2.08 | 4.38E-02 |
| <b>SMYD2</b>    | -1.84 | 1.41E-02 | b.t.  | n.s.     |
| <b>ZNF225</b>   | -1.84 | 6.40E-03 | b.t.  | n.s.     |
| <b>ZSWIM6</b>   | -1.84 | 1.73E-02 | b.t.  | n.s.     |
| <b>BTBD7</b>    | -1.85 | 1.40E-03 | b.t.  | n.s.     |
| <b>CASP4</b>    | -1.85 | 2.98E-02 | b.t.  | n.s.     |
| <b>PPP3CA</b>   | -1.85 | 2.46E-02 | -1.86 | 1.82E-02 |
| <b>TBC1D1</b>   | -1.85 | 3.55E-02 | -1.92 | 1.83E-02 |
| <b>ZBTB14</b>   | -1.85 | 1.12E-02 | -1.72 | 1.25E-02 |
| <b>GPR174</b>   | -1.86 | 1.74E-02 | b.t.  | n.s.     |
| <b>HSDL1</b>    | -1.86 | 2.00E-04 | -1.54 | 1.67E-02 |
| <b>SP140</b>    | -1.86 | 3.66E-02 | b.t.  | n.s.     |
| <b>VPS13C</b>   | -1.86 | 4.35E-02 | b.t.  | n.s.     |
| <b>ZNF75D</b>   | -1.86 | 1.22E-02 | b.t.  | n.s.     |
| <b>ZNF773</b>   | -1.86 | 1.30E-03 | b.t.  | n.s.     |
| <b>APOBEC3F</b> | -1.87 | 3.49E-02 | b.t.  | n.s.     |
| <b>DOCK8</b>    | -1.87 | 2.43E-02 | b.t.  | n.s.     |
| <b>MAT2B</b>    | -1.87 | 3.63E-02 | b.t.  | n.s.     |
| <b>NUAK2</b>    | -1.87 | 3.94E-02 | b.t.  | n.s.     |
| <b>OPN3</b>     | -1.87 | 4.06E-02 | -2.71 | 2.77E-02 |
| <b>PDLIM1</b>   | -1.87 | 2.81E-02 | -2.4  | 1.09E-02 |
| <b>PEG10</b>    | -1.87 | 4.20E-02 | -2.34 | 1.80E-03 |
| <b>RDH5</b>     | -1.87 | 1.90E-03 | b.t.  | n.s.     |
| <b>FAM117A</b>  | -1.88 | 2.94E-02 | -2.16 | 2.81E-02 |
| <b>METTL4</b>   | -1.88 | 3.30E-03 | -1.55 | 4.21E-02 |
| <b>PPP1R3B</b>  | -1.89 | 2.00E-04 | -1.52 | 3.38E-02 |

|                 |       |          |       |          |
|-----------------|-------|----------|-------|----------|
| <b>CHD7</b>     | -1.89 | 8.80E-03 | b.t.  | n.s.     |
| <b>CRLF3</b>    | -1.89 | 1.15E-02 | -1.83 | 3.01E-02 |
| <b>RNF24</b>    | -1.89 | 6.70E-03 | b.t.  | n.s.     |
| <b>TCF4</b>     | -1.89 | 5.30E-03 | -1.74 | 1.15E-02 |
| <b>CD37</b>     | -1.9  | 1.01E-02 | b.t.  | n.s.     |
| <b>CTDSP2</b>   | -1.9  | 3.05E-02 | b.t.  | n.s.     |
| <b>CTRL</b>     | -1.9  | 5.80E-03 | b.t.  | n.s.     |
| <b>DMXL1</b>    | -1.9  | 1.04E-02 | -1.88 | 1.08E-02 |
| <b>FAM78A</b>   | -1.9  | 8.00E-03 | b.t.  | n.s.     |
| <b>GIMAP2</b>   | -1.9  | 2.05E-02 | -1.84 | 1.08E-02 |
| <b>LIN7B</b>    | -1.9  | 3.60E-03 | -1.61 | 1.90E-03 |
| <b>MTMR3</b>    | -1.9  | 4.91E-02 | b.t.  | n.s.     |
| <b>TMEM60</b>   | -1.9  | 2.26E-02 | b.t.  | n.s.     |
| <b>ZNF224</b>   | -1.9  | 3.00E-03 | b.t.  | n.s.     |
| <b>RCS1</b>     | -1.91 | 3.34E-02 | b.t.  | n.s.     |
| <b>SLC35E2B</b> | -1.91 | 2.46E-02 | b.t.  | n.s.     |
| <b>TBC1D10C</b> | -1.91 | 2.90E-02 | b.t.  | n.s.     |
| <b>TMEM86A</b>  | -1.91 | 1.60E-03 | b.t.  | n.s.     |
| <b>GNRH1</b>    | -1.92 | 3.53E-02 | b.t.  | n.s.     |
| <b>KLHL14</b>   | -1.92 | 2.98E-02 | b.t.  | n.s.     |
| <b>RAP1GAP2</b> | -1.92 | 4.14E-02 | -1.84 | 1.38E-02 |
| <b>CDC42SE2</b> | -1.93 | 1.70E-03 | -1.87 | 1.00E-03 |
| <b>HPS3</b>     | -1.93 | 7.00E-04 | -1.68 | 4.90E-03 |
| <b>TMEM219</b>  | -1.93 | 3.80E-05 | b.t.  | n.s.     |
| <b>MFS1D8</b>   | -1.94 | 6.70E-03 | b.t.  | n.s.     |
| <b>TRAF5</b>    | -1.94 | 1.59E-02 | b.t.  | n.s.     |
| <b>GIT2</b>     | -1.95 | 3.00E-03 | -1.71 | 5.80E-03 |
| <b>MBNL3</b>    | -1.95 | 2.00E-03 | -2.01 | 3.60E-03 |
| <b>MSRA</b>     | -1.95 | 5.90E-03 | -1.6  | 4.56E-02 |

|                 |       |          |       |          |
|-----------------|-------|----------|-------|----------|
| <b>NCF1</b>     | -1.95 | 2.10E-03 | -1.74 | 1.89E-02 |
| <b>PRKD2</b>    | -1.95 | 4.67E-02 | -2.69 | 9.80E-03 |
| <b>PRKX</b>     | -1.95 | 1.62E-02 | b.t.  | n.s.     |
| <b>PTAR1</b>    | -1.95 | 1.19E-02 | -1.55 | 3.14E-02 |
| <b>RC3H2</b>    | -1.95 | 1.00E-03 | b.t.  | n.s.     |
| <b>ZNF211</b>   | -1.95 | 8.00E-04 | b.t.  | n.s.     |
| <b>FBXO5</b>    | -1.96 | 4.83E-02 | -1.84 | 2.92E-02 |
| <b>RNF38</b>    | -1.96 | 3.70E-03 | -1.97 | 1.26E-02 |
| <b>SAMHD1</b>   | -1.96 | 2.35E-02 | b.t.  | n.s.     |
| <b>SDCBP</b>    | -1.96 | 4.75E-02 | b.t.  | n.s.     |
| <b>TIPARP</b>   | -1.96 | 4.34E-02 | -2.24 | 1.67E-02 |
| <b>USP28</b>    | -1.96 | 1.10E-03 | b.t.  | n.s.     |
| <b>ZBTB24</b>   | -1.96 | 3.25E-02 | b.t.  | n.s.     |
| <b>DTNBP1</b>   | -1.98 | 4.24E-02 | b.t.  | n.s.     |
| <b>ITM2B</b>    | -1.98 | 5.10E-03 | b.t.  | n.s.     |
| <b>SETDB2</b>   | -1.98 | 3.03E-02 | -2.31 | 2.58E-02 |
| <b>SETX</b>     | -1.98 | 3.40E-03 | -2.19 | 4.80E-03 |
| <b>TXNDC16</b>  | -1.98 | 7.00E-04 | -1.85 | 3.00E-04 |
| <b>CPEB3</b>    | -1.99 | 4.14E-05 | b.t.  | n.s.     |
| <b>FBXL20</b>   | -1.99 | 1.93E-02 | b.t.  | n.s.     |
| <b>OXR1</b>     | -1.99 | 9.00E-04 | b.t.  | n.s.     |
| <b>USP6NL</b>   | -1.99 | 3.79E-02 | b.t.  | n.s.     |
| <b>ANKRD13A</b> | -2    | 7.00E-03 | -2.08 | 8.20E-03 |
| <b>APOL3</b>    | -2    | 5.60E-03 | -2.81 | 7.63E-05 |
| <b>CLCN6</b>    | -2    | 7.50E-03 | b.t.  | n.s.     |
| <b>FMR1</b>     | -2    | 2.00E-04 | -2.21 | 5.00E-04 |
| <b>HERPUD2</b>  | -2    | 4.50E-03 | b.t.  | n.s.     |
| <b>SELL</b>     | -2    | 6.40E-03 | b.t.  | n.s.     |
| <b>SOS1</b>     | -2    | 4.00E-04 | -2.55 | 2.00E-04 |

|                 |       |          |       |          |
|-----------------|-------|----------|-------|----------|
| <b>SUSD6</b>    | -2    | 2.97E-02 | b.t.  | n.s.     |
| <b>ZNF528</b>   | -2    | 2.93E-02 | b.t.  | n.s.     |
| <b>GNB5</b>     | -2.01 | 4.80E-03 | -1.89 | 7.60E-03 |
| <b>TCF3</b>     | -2.01 | 4.50E-03 | -1.75 | 1.12E-02 |
| <b>AFTPH</b>    | -2.02 | 5.00E-04 | -1.55 | 7.00E-03 |
| <b>C11orf68</b> | -2.02 | 3.39E-02 | b.t.  | n.s.     |
| <b>CCDC28A</b>  | -2.02 | 4.56E-02 | -2.71 | 4.73E-02 |
| <b>PKN2</b>     | -2.02 | 2.65E-02 | b.t.  | n.s.     |
| <b>SOAT1</b>    | -2.02 | 3.00E-03 | b.t.  | n.s.     |
| <b>STK38</b>    | -2.02 | 3.57E-02 | -1.7  | 3.53E-02 |
| <b>CMTM1</b>    | -2.03 | 2.66E-02 | -1.65 | 5.50E-03 |
| <b>CYB561A3</b> | -2.03 | 4.15E-02 | b.t.  | n.s.     |
| <b>FBXL3</b>    | -2.03 | 2.52E-02 | b.t.  | n.s.     |
| <b>PHC3</b>     | -2.03 | 5.20E-03 | -1.72 | 3.39E-02 |
| <b>ZNF283</b>   | -2.03 | 7.40E-03 | b.t.  | n.s.     |
| <b>RFX7</b>     | -2.04 | 4.90E-03 | b.t.  | n.s.     |
| <b>NDRG1</b>    | -2.05 | 2.00E-03 | -2.02 | 7.50E-03 |
| <b>STARD7</b>   | -2.05 | 6.00E-04 | -2.06 | 1.40E-03 |
| <b>TTC17</b>    | -2.05 | 4.63E-02 | b.t.  | n.s.     |
| <b>SOWAHD</b>   | -2.06 | 1.00E-02 | -1.52 | 7.40E-03 |
| <b>LCORL</b>    | -2.06 | 3.00E-04 | -2.07 | 1.00E-03 |
| <b>TMX4</b>     | -2.06 | 1.19E-02 | -2.52 | 6.70E-03 |
| <b>CD6</b>      | -2.07 | 4.73E-02 | b.t.  | n.s.     |
| <b>PDGFRB</b>   | -2.07 | 3.22E-02 | b.t.  | n.s.     |
| <b>PHF19</b>    | -2.07 | 4.80E-03 | b.t.  | n.s.     |
| <b>SRGAP2B</b>  | -2.07 | 2.70E-02 | -1.57 | 3.44E-02 |
| <b>LYSMD2</b>   | -2.08 | 4.09E-02 | -2.18 | 2.38E-02 |
| <b>GAB3</b>     | -2.08 | 3.00E-03 | -2.22 | 1.80E-03 |
| <b>LRP5L</b>    | -2.08 | 4.73E-02 | b.t.  | n.s.     |

|                 |       |          |       |          |
|-----------------|-------|----------|-------|----------|
| <b>S100PBP</b>  | -2.08 | 4.59E-02 | b.t.  | n.s.     |
| <b>ZMYM1</b>    | -2.09 | 7.70E-03 | b.t.  | n.s.     |
| <b>CASS4</b>    | -2.1  | 1.45E-02 | -2.12 | 4.80E-03 |
| <b>YPEL2</b>    | -2.1  | 3.10E-03 | -2.03 | 1.81E-02 |
| <b>BBX</b>      | -2.11 | 6.70E-03 | -1.92 | 1.04E-02 |
| <b>N4BP1</b>    | -2.11 | 2.61E-02 | b.t.  | n.s.     |
| <b>NEMP1</b>    | -2.11 | 2.35E-02 | b.t.  | n.s.     |
| <b>SARAF</b>    | -2.11 | 2.11E-02 | -2.23 | 8.10E-03 |
| <b>SLFN13</b>   | -2.11 | 1.98E-02 | b.t.  | n.s.     |
| <b>SNX16</b>    | -2.11 | 1.20E-03 | -1.76 | 3.94E-02 |
| <b>ZHX2</b>     | -2.12 | 3.40E-02 | -1.92 | 3.27E-02 |
| <b>RICTOR</b>   | -2.12 | 2.40E-03 | b.t.  | n.s.     |
| <b>TRIM52</b>   | -2.12 | 5.80E-03 | -1.67 | 2.70E-02 |
| <b>ANTXR2</b>   | -2.13 | 8.10E-03 | -3.14 | 8.60E-03 |
| <b>GCNT2</b>    | -2.13 | 7.80E-03 | b.t.  | n.s.     |
| <b>OPTN</b>     | -2.13 | 3.95E-02 | b.t.  | n.s.     |
| <b>SGK3</b>     | -2.13 | 5.00E-04 | -2.62 | 1.40E-03 |
| <b>SGPP1</b>    | -2.14 | 4.60E-03 | -1.78 | 2.17E-02 |
| <b>ABCB4</b>    | -2.14 | 6.00E-03 | -2.02 | 8.70E-03 |
| <b>CDKN1B</b>   | -2.14 | 1.32E-02 | -1.68 | 3.36E-02 |
| <b>BANP</b>     | -2.15 | 2.11E-02 | b.t.  | n.s.     |
| <b>CAPRIN2</b>  | -2.15 | 3.85E-02 | b.t.  | n.s.     |
| <b>KDM7A</b>    | -2.15 | 3.89E-02 | -1.96 | 3.17E-02 |
| <b>LRRC37B</b>  | -2.15 | 2.54E-02 | b.t.  | n.s.     |
| <b>TEC</b>      | -2.15 | 6.70E-03 | -2.12 | 1.90E-03 |
| <b>NFATC1</b>   | -2.16 | 2.80E-03 | -2.25 | 6.00E-03 |
| <b>ATP9B</b>    | -2.17 | 8.60E-03 | b.t.  | n.s.     |
| <b>HBP1</b>     | -2.17 | 2.20E-03 | -2.14 | 2.58E-02 |
| <b>LRRC37A3</b> | -2.17 | 1.72E-02 | b.t.  | n.s.     |

|          |       |          |       |          |
|----------|-------|----------|-------|----------|
| SLC18B1  | -2.17 | 2.00E-03 | b.t.  | n.s.     |
| SLC35A1  | -2.17 | 2.80E-03 | b.t.  | n.s.     |
| IL10RA   | -2.18 | 4.47E-02 | b.t.  | n.s.     |
| SLC15A2  | -2.18 | 2.00E-03 | -2    | 1.56E-02 |
| TP53INP1 | -2.18 | 7.60E-03 | b.t.  | n.s.     |
| ABCA7    | -2.19 | 4.69E-02 | b.t.  | n.s.     |
| FAM13B   | -2.19 | 2.00E-04 | b.t.  | n.s.     |
| NBPF12   | -2.19 | 4.62E-02 | b.t.  | n.s.     |
| PITPNM2  | -2.19 | 1.82E-02 | b.t.  | n.s.     |
| SHISA5   | -2.19 | 1.89E-02 | b.t.  | n.s.     |
| ATXN1    | -2.2  | 2.46E-02 | b.t.  | n.s.     |
| IQCG     | -2.2  | 6.60E-03 | -2.03 | 3.97E-02 |
| MBP      | -2.2  | 1.44E-02 | -1.98 | 1.95E-02 |
| RAPGEF2  | -2.2  | 1.82E-02 | b.t.  | n.s.     |
| RNF149   | -2.2  | 3.40E-03 | -2.4  | 1.35E-02 |
| ACSF2    | -2.21 | 8.80E-03 | -2.69 | 1.36E-02 |
| ARHGAP12 | -2.22 | 1.10E-03 | -2.02 | 3.10E-03 |
| CCDC30   | -2.22 | 1.02E-02 | b.t.  | n.s.     |
| HDAC5    | -2.22 | 1.14E-02 | -1.95 | 2.89E-02 |
| LPAR5    | -2.22 | 1.37E-02 | b.t.  | n.s.     |
| MAN2A1   | -2.22 | 7.60E-03 | -2.04 | 1.93E-02 |
| TRIM38   | -2.22 | 2.50E-03 | -1.52 | 4.80E-03 |
| BTBD9    | -2.23 | 1.11E-02 | b.t.  | n.s.     |
| LCK      | -2.23 | 1.28E-02 | -2.47 | 4.90E-03 |
| C16orf74 | -2.24 | 2.05E-02 | b.t.  | n.s.     |
| ING4     | -2.24 | 9.70E-03 | -1.5  | 4.01E-02 |
| SYK      | -2.24 | 3.16E-02 | -1.96 | 3.80E-03 |
| CD52     | -2.25 | 1.91E-02 | -2.34 | 1.22E-02 |
| SIK3     | -2.25 | 3.47E-02 | b.t.  | n.s.     |

|          |       |          |       |          |
|----------|-------|----------|-------|----------|
| PNPLA8   | -2.26 | 2.70E-03 | -1.93 | 8.20E-03 |
| PTPRC    | -2.26 | 2.74E-02 | b.t.  | n.s.     |
| ST6GAL1  | -2.26 | 5.00E-04 | -1.81 | 5.70E-03 |
| TNKS2    | -2.26 | 5.23E-05 | -2.12 | 2.00E-04 |
| FAXDC2   | -2.27 | 2.28E-02 | -3.04 | 9.20E-03 |
| PARVG    | -2.27 | 1.50E-02 | -2.25 | 1.98E-02 |
| RNF122   | -2.27 | 2.60E-03 | -1.91 | 2.04E-02 |
| RPA1     | -2.27 | 1.57E-02 | -1.93 | 7.50E-03 |
| DNMBP    | -2.29 | 8.00E-04 | -2.32 | 5.10E-03 |
| FGD3     | -2.29 | 8.90E-03 | -2.34 | 2.84E-02 |
| MGME1    | -2.29 | 4.80E-03 | b.t.  | n.s.     |
| TULP4    | -2.29 | 1.10E-03 | -2.61 | 2.50E-03 |
| WDFY1    | -2.29 | 2.24E-02 | -3.16 | 4.33E-02 |
| ARRDC5   | -2.3  | 1.95E-02 | b.t.  | n.s.     |
| NFATC3   | -2.3  | 5.43E-05 | -2.58 | 1.83E-05 |
| C12orf74 | -2.31 | 2.30E-03 | -2.16 | 1.06E-02 |
| KAT6B    | -2.31 | 4.60E-05 | -2.24 | 2.20E-03 |
| KAT2B    | -2.31 | 3.20E-03 | -1.91 | 3.20E-03 |
| SLC39A10 | -2.31 | 2.40E-03 | -1.97 | 3.88E-02 |
| UGT8     | -2.31 | 6.00E-04 | -1.89 | 4.32E-02 |
| ZFP14    | -2.31 | 1.87E-02 | b.t.  | n.s.     |
| BMPR2    | -2.32 | 2.04E-02 | -2.14 | 4.86E-02 |
| CDKL1    | -2.32 | 4.40E-03 | -1.85 | 7.00E-03 |
| PGBD2    | -2.32 | 7.00E-04 | b.t.  | n.s.     |
| TRIM23   | -2.32 | 1.00E-03 | b.t.  | n.s.     |
| CXXC5    | -2.33 | 6.60E-03 | b.t.  | n.s.     |
| PDE4B    | -2.33 | 2.27E-02 | b.t.  | n.s.     |
| ZNF862   | -2.33 | 2.95E-02 | b.t.  | n.s.     |
| SPIN4    | -2.34 | 2.00E-04 | -1.98 | 4.50E-03 |

|           |       |          |       |          |
|-----------|-------|----------|-------|----------|
| GLIPR1    | -2.35 | 3.53E-02 | b.t.  | n.s.     |
| ITGAE     | -2.35 | 2.20E-03 | -2.45 | 2.40E-03 |
| KLHDC1    | -2.35 | 2.01E-02 | b.t.  | n.s.     |
| SECISBP2L | -2.35 | 3.80E-03 | -2.26 | 9.20E-03 |
| BROX      | -2.36 | 2.00E-04 | b.t.  | n.s.     |
| VEZF1     | -2.36 | 3.00E-04 | b.t.  | n.s.     |
| STAP1     | -2.37 | 1.24E-02 | b.t.  | n.s.     |
| SLC44A2   | -2.37 | 6.90E-03 | b.t.  | n.s.     |
| VCP1P1    | -2.37 | 1.63E-06 | -2.16 | 7.64E-05 |
| GAB1      | -2.38 | 1.08E-05 | -2.34 | 6.00E-04 |
| NIPA1     | -2.38 | 2.07E-02 | b.t.  | n.s.     |
| NOD1      | -2.38 | 5.84E-05 | -1.62 | 3.00E-03 |
| PCMTD2    | -2.38 | 1.03E-02 | b.t.  | n.s.     |
| NMT2      | -2.39 | 5.80E-03 | b.t.  | n.s.     |
| SRGAP2C   | -2.4  | 4.22E-02 | -1.85 | 4.42E-02 |
| CXorf21   | -2.41 | 7.00E-03 | b.t.  | n.s.     |
| SIPA1L3   | -2.41 | 1.34E-02 | -2.34 | 1.26E-02 |
| ZBTB1     | -2.41 | 2.87E-02 | b.t.  | n.s.     |
| ZCCHC2    | -2.41 | 3.30E-03 | -2.71 | 1.40E-02 |
| OSBPL10   | -2.42 | 1.10E-02 | -2.94 | 3.90E-02 |
| ZER1      | -2.42 | 3.94E-02 | b.t.  | n.s.     |
| SLAMF6    | -2.43 | 2.17E-02 | b.t.  | n.s.     |
| HSD17B11  | -2.43 | 1.85E-02 | b.t.  | n.s.     |
| RGL2      | -2.43 | 4.06E-02 | b.t.  | n.s.     |
| HS2ST1    | -2.46 | 1.20E-03 | -1.86 | 2.69E-02 |
| MXI1      | -2.47 | 6.80E-03 | -2.8  | 2.40E-03 |
| SIDT1     | -2.48 | 4.20E-03 | -1.63 | 3.89E-02 |
| TMEM71    | -2.48 | 3.34E-02 | -2.13 | 4.32E-02 |
| SLC12A6   | -2.49 | 7.20E-03 | -2.62 | 4.10E-03 |

|          |       |          |       |          |
|----------|-------|----------|-------|----------|
| ZNF592   | -2.49 | 4.00E-04 | b.t.  | n.s.     |
| BTG2     | -2.5  | 1.10E-03 | -1.9  | 3.29E-02 |
| PRDM8    | -2.51 | 4.40E-03 | -2.03 | 4.26E-02 |
| ATP10D   | -2.52 | 4.94E-02 | b.t.  | n.s.     |
| CTSS     | -2.52 | 5.00E-04 | -2.22 | 1.10E-03 |
| MARCH3   | -2.52 | 8.00E-03 | -1.93 | 2.00E-03 |
| NLRP1    | -2.52 | 3.37E-02 | b.t.  | n.s.     |
| RPS6KA5  | -2.52 | 2.60E-03 | -2.49 | 4.30E-03 |
| KLHL24   | -2.53 | 6.40E-03 | b.t.  | n.s.     |
| OTUD1    | -2.54 | 1.60E-03 | -2.08 | 4.10E-03 |
| DDX58    | -2.54 | 2.06E-02 | b.t.  | n.s.     |
| SIAH1    | -2.54 | 7.50E-03 | -2.66 | 1.14E-02 |
| CASP8    | -2.55 | 2.19E-02 | b.t.  | n.s.     |
| LPP      | -2.55 | 2.05E-02 | b.t.  | n.s.     |
| RALGPS2  | -2.55 | 1.68E-02 | b.t.  | n.s.     |
| SRGAP2   | -2.56 | 1.46E-02 | -2.15 | 1.63E-02 |
| VIPR1    | -2.57 | 1.87E-06 | -1.66 | 2.30E-03 |
| CARD16   | -2.58 | 2.01E-02 | b.t.  | n.s.     |
| MOB3C    | -2.58 | 2.10E-03 | -2.5  | 1.51E-02 |
| UBR2     | -2.58 | 3.00E-04 | b.t.  | n.s.     |
| PRDM2    | -2.59 | 2.89E-02 | b.t.  | n.s.     |
| ZBTB38   | -2.59 | 1.43E-02 | -2.56 | 1.21E-02 |
| YPEL5    | -2.6  | 4.00E-04 | -2.13 | 1.49E-02 |
| SLC25A28 | -2.61 | 4.65E-08 | -1.62 | 7.89E-05 |
| B3GALT4  | -2.63 | 4.50E-03 | -1.61 | 2.17E-02 |
| SLC29A3  | -2.63 | 4.00E-04 | b.t.  | n.s.     |
| ZNF831   | -2.64 | 2.30E-03 | -1.93 | 6.20E-03 |
| XKRX     | -2.64 | 2.84E-02 | -3.76 | 4.13E-02 |
| CHST11   | -2.65 | 2.30E-03 | -2.95 | 2.40E-02 |

|         |       |          |       |          |
|---------|-------|----------|-------|----------|
| IGFLR1  | -2.65 | 1.87E-02 | -2.85 | 7.50E-03 |
| FAM214A | -2.7  | 7.10E-03 | b.t.  | n.s.     |
| SLC30A4 | -2.71 | 1.20E-03 | -2.26 | 3.41E-02 |
| SUSD3   | -2.72 | 6.60E-03 | -2.04 | 1.80E-02 |
| ZNF652  | -2.72 | 9.00E-03 | -2.31 | 2.91E-02 |
| GMFG    | -2.73 | 8.00E-04 | -2.9  | 1.20E-03 |
| RTP4    | -2.74 | 2.52E-02 | -3.63 | 3.36E-02 |
| CDCA7L  | -2.75 | 1.01E-02 | -2.89 | 6.10E-03 |
| TEP1    | -2.75 | 2.40E-03 | -3.04 | 1.76E-02 |
| BTD     | -2.76 | 6.00E-04 | b.t.  | n.s.     |
| HLA-DMA | -2.77 | 9.40E-03 | -3.02 | 2.82E-02 |
| LRRN1   | -2.77 | 1.53E-02 | -2.01 | 4.32E-02 |
| TESK2   | -2.77 | 7.90E-03 | -2.97 | 2.08E-02 |
| ARHGAP9 | -2.79 | 2.34E-02 | -2.27 | 4.25E-02 |
| ATM     | -2.8  | 1.26E-02 | -2.25 | 4.02E-02 |
| VAMP1   | -2.8  | 7.00E-04 | -1.63 | 1.34E-02 |
| SELPLG  | -2.82 | 2.51E-02 | b.t.  | n.s.     |
| HMCES   | -2.82 | 1.01E-02 | -3.56 | 1.10E-03 |
| PHKB    | -2.83 | 1.18E-02 | -3.57 | 4.74E-02 |
| ADRB2   | -2.84 | 2.26E-06 | -1.67 | 2.40E-03 |
| OR56B1  | -2.84 | 3.79E-02 | b.t.  | n.s.     |
| MORC3   | -2.84 | 4.00E-04 | b.t.  | n.s.     |
| ARAP2   | -2.85 | 7.60E-03 | -2.76 | 2.73E-02 |
| SLFN12L | -2.85 | 3.39E-02 | b.t.  | n.s.     |
| FCRL1   | -2.91 | 4.00E-03 | b.t.  | n.s.     |
| PATL2   | -2.92 | 2.00E-04 | -2.41 | 9.00E-04 |
| E2F5    | -2.93 | 7.00E-04 | -2.56 | 1.09E-02 |
| ABLIM1  | -2.97 | 4.70E-02 | b.t.  | n.s.     |
| CREBRF  | -2.97 | 9.90E-03 | -2.25 | 3.37E-02 |

|          |       |          |       |          |
|----------|-------|----------|-------|----------|
| DDAH2    | -2.98 | 4.46E-02 | -3.42 | 3.23E-02 |
| HLA-DMB  | -2.98 | 7.20E-03 | -3.08 | 1.39E-02 |
| LRRK2    | -2.99 | 4.39E-05 | -3.68 | 8.01E-05 |
| PLEKHG7  | -3.01 | 3.00E-03 | -1.76 | 2.17E-02 |
| HEATR6   | -3.02 | 6.00E-03 | -2.12 | 2.80E-02 |
| TEAD2    | -3.02 | 3.17E-02 | b.t.  | n.s.     |
| ZNF266   | -3.02 | 8.90E-03 | b.t.  | n.s.     |
| PCMTD1   | -3.03 | 6.00E-04 | -1.93 | 5.70E-03 |
| LMBRD1   | -3.04 | 1.00E-04 | -1.84 | 3.10E-03 |
| NT5C2    | -3.04 | 2.12E-02 | b.t.  | n.s.     |
| SFXN3    | -3.05 | 8.00E-04 | -2.55 | 7.00E-04 |
| ZBTB44   | -3.06 | 8.00E-04 | -1.96 | 1.38E-02 |
| DHRS1    | -3.08 | 1.09E-02 | b.t.  | n.s.     |
| CDK19    | -3.11 | 1.02E-02 | -2.27 | 2.00E-02 |
| RAB31    | -3.11 | 4.20E-03 | -3.29 | 1.40E-03 |
| RHOC     | -3.11 | 2.09E-02 | -3.58 | 2.32E-02 |
| ATP2A3   | -3.14 | 3.85E-02 | b.t.  | n.s.     |
| TNFRSF17 | -3.15 | 3.18E-02 | b.t.  | n.s.     |
| PARP11   | -3.16 | 1.80E-03 | -2.75 | 2.31E-02 |
| TRAM2    | -3.2  | 2.70E-02 | b.t.  | n.s.     |
| DNAJC1   | -3.24 | 3.39E-05 | -2.14 | 7.00E-04 |
| ILK      | -3.24 | 9.00E-04 | -1.84 | 1.55E-02 |
| IRS1     | -3.25 | 2.63E-05 | -1.78 | 1.39E-02 |
| NR1D2    | -3.25 | 6.53E-05 | -2.53 | 7.20E-03 |
| DCLRE1C  | -3.27 | 6.87E-07 | -2.85 | 1.00E-04 |
| ZC4H2    | -3.27 | 2.00E-04 | -2.29 | 1.70E-03 |
| CCDC88A  | -3.28 | 4.67E-02 | b.t.  | n.s.     |
| CD69     | -3.28 | 5.80E-03 | b.t.  | n.s.     |
| SERPINI1 | -3.28 | 2.30E-03 | -3.91 | 2.80E-03 |

|                 |       |          |       |          |
|-----------------|-------|----------|-------|----------|
| <b>BTN3A2</b>   | -3.29 | 1.64E-02 | b.t.  | n.s.     |
| <b>MAP3K1</b>   | -3.3  | 6.00E-04 | -2.58 | 6.40E-03 |
| <b>CLK1</b>     | -3.34 | 1.50E-02 | b.t.  | n.s.     |
| <b>CHPT1</b>    | -3.36 | 1.30E-02 | -2.83 | 8.80E-03 |
| <b>XRN1</b>     | -3.36 | 3.22E-02 | b.t.  | n.s.     |
| <b>PVRIG</b>    | -3.37 | 5.00E-04 | -3.64 | 9.00E-04 |
| <b>ANXA2R</b>   | -3.38 | 4.97E-05 | -4.4  | 2.00E-04 |
| <b>TNFSF13B</b> | -3.41 | 1.36E-02 | -7.59 | 3.00E-04 |
| <b>RHOH</b>     | -3.43 | 1.80E-03 | -1.91 | 4.58E-02 |
| <b>SMCHD1</b>   | -3.43 | 1.20E-03 | -2.11 | 2.97E-02 |
| <b>UTRN</b>     | -3.44 | 3.70E-03 | -2.55 | 2.32E-02 |
| <b>LRRC37A</b>  | -3.49 | 2.09E-02 | b.t.  | n.s.     |
| <b>AIM2</b>     | -3.5  | 1.40E-02 | -3.36 | 4.21E-02 |
| <b>VAV3</b>     | -3.5  | 1.60E-03 | -2.69 | 1.04E-02 |
| <b>MAP2</b>     | -3.51 | 6.00E-04 | -2.01 | 2.29E-02 |
| <b>FAM122C</b>  | -3.53 | 3.00E-04 | -1.85 | 2.15E-02 |
| <b>ORAI2</b>    | -3.55 | 1.10E-03 | -2.99 | 2.40E-03 |
| <b>RERE</b>     | -3.56 | 8.70E-03 | -2.15 | 1.65E-02 |
| <b>PIK3IP1</b>  | -3.57 | 5.70E-03 | -2.69 | 2.20E-02 |
| <b>TCL1A</b>    | -3.62 | 1.00E-02 | b.t.  | n.s.     |
| <b>CASP10</b>   | -3.64 | 4.62E-02 | b.t.  | n.s.     |
| <b>IL7</b>      | -3.65 | 2.57E-02 | -2.22 | 1.44E-02 |
| <b>SETBP1</b>   | -3.65 | 8.00E-04 | -3.31 | 1.00E-03 |
| <b>GGA2</b>     | -3.68 | 2.00E-04 | -2.27 | 6.00E-03 |
| <b>TRIM22</b>   | -3.68 | 2.98E-02 | b.t.  | n.s.     |
| <b>CABLES1</b>  | -3.7  | 3.18E-02 | b.t.  | n.s.     |
| <b>TMEM63A</b>  | -3.72 | 8.00E-04 | -3.36 | 3.80E-03 |
| <b>SAT1</b>     | -3.76 | 5.00E-04 | -3.65 | 1.60E-03 |
| <b>ANKRD12</b>  | -3.77 | 3.76E-02 | b.t.  | n.s.     |

|          |       |          |       |          |
|----------|-------|----------|-------|----------|
| TBC1D9   | -3.77 | 1.00E-03 | -4.15 | 8.80E-03 |
| DNAJC28  | -3.78 | 1.10E-03 | -3.87 | 1.90E-03 |
| CALCOCO1 | -3.78 | 1.85E-02 | b.t.  | n.s.     |
| RAPGEF3  | -3.79 | 3.10E-03 | -2.96 | 1.46E-02 |
| STIM2    | -3.81 | 2.00E-04 | -2.22 | 1.02E-02 |
| TGFBR2   | -3.81 | 1.33E-06 | -2.9  | 2.83E-05 |
| CYTIP    | -3.82 | 1.49E-02 | b.t.  | n.s.     |
| NCF4     | -3.82 | 1.88E-05 | -2.59 | 2.30E-03 |
| ADAMTS6  | -3.85 | 1.31E-02 | -3.09 | 3.56E-02 |
| PTPRCAP  | -3.87 | 4.38E-02 | b.t.  | n.s.     |
| KMO      | -3.9  | 1.50E-03 | -3.73 | 1.50E-03 |
| RAB27B   | -3.92 | 6.60E-03 | -5.53 | 1.80E-03 |
| CEACAM5  | -3.97 | 9.60E-03 | -2.05 | 4.90E-02 |
| PELI1    | -3.99 | 6.00E-04 | -2.31 | 2.30E-02 |
| TNS3     | -4.03 | 3.11E-02 | b.t.  | n.s.     |
| STAMBPL1 | -4.05 | 7.00E-04 | -2.71 | 4.50E-03 |
| LBH      | -4.06 | 1.71E-02 | b.t.  | n.s.     |
| BCL11A   | -4.14 | 2.10E-02 | -3.74 | 2.42E-02 |
| IRF1     | -4.14 | 1.78E-02 | -7.09 | 2.09E-02 |
| GNAZ     | -4.16 | 4.50E-03 | -2.53 | 2.47E-02 |
| FCRL5    | -4.24 | 2.32E-02 | b.t.  | n.s.     |
| NUB1     | -4.24 | 3.00E-04 | -2.85 | 3.30E-03 |
| EVL      | -4.26 | 5.81E-06 | -3.01 | 1.00E-04 |
| LAX1     | -4.29 | 4.30E-03 | -2.95 | 6.40E-03 |
| NAGK     | -4.3  | 5.70E-03 | -4.5  | 7.40E-03 |
| SESN1    | -4.32 | 1.10E-05 | -3.27 | 1.20E-03 |
| NT5C3A   | -4.36 | 1.26E-02 | b.t.  | n.s.     |
| ATXN7    | -4.38 | 9.87E-07 | -2.6  | 1.64E-05 |
| TMEM140  | -4.39 | 2.52E-05 | -3.66 | 6.00E-04 |

|                 |       |          |       |          |
|-----------------|-------|----------|-------|----------|
| <b>PDCD1LG2</b> | -4.43 | 1.96E-02 | -2.36 | 4.29E-02 |
| <b>PECAM1</b>   | -4.45 | 8.60E-03 | -6.18 | 3.50E-03 |
| <b>MARCH8</b>   | -4.51 | 2.09E-05 | -2.46 | 1.20E-03 |
| <b>PRKCE</b>    | -4.51 | 3.00E-04 | -6.24 | 5.00E-04 |
| <b>RASGEF1B</b> | -4.57 | 9.40E-03 | b.t.  | n.s.     |
| <b>TMEM19</b>   | -4.59 | 2.70E-05 | -2.38 | 1.40E-03 |
| <b>CHST12</b>   | -4.61 | 1.00E-04 | -2.97 | 1.24E-02 |
| <b>STX7</b>     | -4.62 | 7.56E-06 | -2.57 | 5.20E-03 |
| <b>CDC25B</b>   | -4.74 | 1.08E-02 | -3.56 | 2.46E-02 |
| <b>PDP1</b>     | -4.76 | 9.00E-04 | -2.77 | 8.50E-03 |
| <b>PTPN6</b>    | -4.83 | 1.43E-02 | -4.87 | 8.80E-03 |
| <b>BTN3A1</b>   | -4.9  | 5.00E-04 | -2.65 | 2.46E-02 |
| <b>FAM117B</b>  | -4.91 | 1.00E-03 | -5.19 | 1.20E-03 |
| <b>CEACAM1</b>  | -4.95 | 2.38E-02 | -4.24 | 4.31E-02 |
| <b>KIAA0040</b> | -4.95 | 6.99E-05 | -2.35 | 4.90E-03 |
| <b>MAPRE2</b>   | -5.01 | 5.38E-05 | -3.19 | 8.00E-04 |
| <b>APBB2</b>    | -5.1  | 7.00E-04 | -6.5  | 2.70E-03 |
| <b>PYCARD</b>   | -5.12 | 2.70E-03 | -4.25 | 1.90E-03 |
| <b>TXNIP</b>    | -5.19 | 3.94E-05 | -5.14 | 9.00E-04 |
| <b>GRK5</b>     | -5.22 | 2.80E-03 | -2.75 | 4.84E-02 |
| <b>LPIN2</b>    | -5.27 | 1.30E-03 | -3.34 | 3.45E-02 |
| <b>L3HYPDH</b>  | -5.32 | 9.40E-03 | -2.27 | 4.56E-02 |
| <b>CLNK</b>     | -5.37 | 1.35E-02 | b.t.  | n.s.     |
| <b>CCR6</b>     | -5.39 | 2.69E-02 | -8.56 | 1.53E-02 |
| <b>SSBP2</b>    | -5.53 | 2.00E-03 | -4.03 | 3.11E-02 |
| <b>FCGR2C</b>   | -5.57 | 3.60E-03 | -4.69 | 1.47E-02 |
| <b>PRICKLE1</b> | -5.63 | 1.45E-08 | -3.58 | 7.83E-07 |
| <b>VAMP5</b>    | -5.66 | 2.00E-04 | -4.44 | 7.68E-05 |
| <b>METTL7A</b>  | -5.67 | 2.70E-03 | -7.27 | 1.52E-02 |

|         |       |          |       |          |
|---------|-------|----------|-------|----------|
| PCDH9   | -5.71 | 1.10E-03 | b.t.  | n.s.     |
| ARHGEF3 | -5.75 | 5.00E-03 | -5.47 | 2.84E-02 |
| TRIB1   | -5.82 | 5.00E-03 | -4.78 | 4.60E-03 |
| LTB     | -5.92 | 7.70E-03 | b.t.  | n.s.     |
| STAT2   | -6.08 | 3.00E-04 | -7.2  | 1.30E-03 |
| PIK3CG  | -6.14 | 6.00E-04 | -8.88 | 1.00E-04 |
| DACT1   | -6.15 | 8.89E-09 | -4.83 | 1.83E-06 |
| CD79B   | -6.16 | 6.00E-04 | -4.42 | 2.40E-03 |
| SYNE2   | -6.17 | 1.73E-02 | -6.01 | 3.70E-02 |
| PARP8   | -6.19 | 6.07E-06 | -5.26 | 2.00E-04 |
| IL18BP  | -6.32 | 1.24E-02 | -3.26 | 1.47E-02 |
| FCGR2B  | -6.34 | 4.10E-03 | -4.16 | 2.48E-02 |
| FRY     | -6.44 | 2.62E-02 | b.t.  | n.s.     |
| ALOX5   | -6.53 | 3.10E-03 | -3.65 | 3.10E-02 |
| PLEKHA2 | -6.75 | 1.15E-05 | -4.95 | 3.00E-04 |
| ANK1    | -6.85 | 8.90E-06 | -4.13 | 4.00E-04 |
| ETV7    | -7.18 | 2.15E-02 | -8.44 | 1.39E-02 |
| COL9A3  | -7.88 | 1.00E-03 | -3.97 | 1.15E-02 |
| CYSLTR1 | -8.14 | 7.60E-03 | -5.19 | 2.17E-02 |
| PTPN22  | -8.15 | 8.00E-07 | -4.72 | 8.26E-05 |
| CLMN    | -8.34 | 2.00E-04 | -6.43 | 1.30E-03 |
| RNASE6  | -8.52 | 4.20E-03 | -4.89 | 1.00E-02 |
| CD24    | -8.66 | 1.30E-05 | -4.58 | 1.20E-03 |
| JAK2    | -8.66 | 3.05E-05 | -4.73 | 2.00E-03 |
| TNFSF10 | -8.74 | 3.68E-02 | b.t.  | n.s.     |
| OAS1    | -8.79 | 1.76E-02 | -4.49 | 3.64E-02 |
| GPR155  | -9.23 | 1.00E-04 | -6.51 | 5.00E-04 |
| TGFBI   | -9.45 | 1.00E-03 | -8.03 | 9.00E-04 |
| CTLA4   | -9.53 | 2.20E-03 | -9.1  | 2.30E-03 |

|                 |        |          |        |          |
|-----------------|--------|----------|--------|----------|
| <b>FAM111B</b>  | -10    | 1.90E-03 | b.t.   | n.s.     |
| <b>GPR18</b>    | -10.51 | 4.00E-04 | -5.44  | 4.30E-03 |
| <b>PDE7B</b>    | -10.76 | 5.00E-03 | -11.39 | 1.69E-02 |
| <b>FCMR</b>     | -10.98 | 3.10E-03 | -13.17 | 1.30E-03 |
| <b>CD27</b>     | -12.14 | 3.50E-03 | -15.76 | 3.20E-03 |
| <b>RNASSET2</b> | -12.52 | 1.70E-03 | -12.98 | 7.00E-04 |
| <b>ID3</b>      | -13.57 | 3.00E-04 | -12.99 | 7.00E-04 |
| <b>SCIMP</b>    | -13.77 | 5.98E-05 | -8.87  | 8.00E-04 |
| <b>LY86</b>     | -14.36 | 1.85E-05 | -11.13 | 8.19E-05 |
| <b>GNG7</b>     | -17.08 | 2.00E-03 | -13.38 | 7.90E-03 |
| <b>ADAM28</b>   | -18.71 | 5.30E-03 | b.t.   | n.s.     |
| <b>IFIT2</b>    | -23.1  | 1.76E-02 | b.t.   | n.s.     |
| <b>RARRES3</b>  | -33.45 | 4.59E-08 | -36.19 | 3.61E-07 |
| <b>GRAMD1B</b>  | b.t.   | n.s.     | 11.07  | 2.16E-02 |
| <b>DGKG</b>     | b.t.   | n.s.     | 10.14  | 1.40E-03 |
| <b>MREG</b>     | b.t.   | n.s.     | 6.26   | 1.70E-02 |
| <b>CCL22</b>    | b.t.   | n.s.     | 4.58   | 9.80E-03 |
| <b>JMY</b>      | b.t.   | n.s.     | 4.34   | 9.50E-03 |
| <b>ELL3</b>     | b.t.   | n.s.     | 4.07   | 4.80E-03 |
| <b>CD40</b>     | b.t.   | n.s.     | 3.59   | 7.30E-03 |
| <b>PAX5</b>     | b.t.   | n.s.     | 3.39   | 7.00E-03 |
| <b>TMEM120A</b> | b.t.   | n.s.     | 3.39   | 1.77E-02 |
| <b>SFT2D1</b>   | b.t.   | n.s.     | 3.08   | 2.67E-02 |
| <b>ATP2B1</b>   | b.t.   | n.s.     | 3.02   | 1.81E-02 |
| <b>MAP3K8</b>   | b.t.   | n.s.     | 2.94   | 1.06E-02 |
| <b>PLA2G4C</b>  | b.t.   | n.s.     | 2.93   | 2.35E-02 |
| <b>CYP27A1</b>  | b.t.   | n.s.     | 2.7    | 7.70E-03 |
| <b>TTC28</b>    | b.t.   | n.s.     | 2.69   | 2.29E-02 |
| <b>TFEB</b>     | b.t.   | n.s.     | 2.64   | 3.62E-02 |

|                 |      |      |      |          |
|-----------------|------|------|------|----------|
| <b>MYO1C</b>    | b.t. | n.s. | 2.53 | 4.00E-04 |
| <b>ETFA</b>     | b.t. | n.s. | 2.52 | 3.90E-02 |
| <b>TOP2A</b>    | b.t. | n.s. | 2.51 | 1.47E-02 |
| <b>ZNF433</b>   | b.t. | n.s. | 2.44 | 2.26E-02 |
| <b>PRKCD</b>    | b.t. | n.s. | 2.35 | 2.45E-02 |
| <b>SMARCA2</b>  | b.t. | n.s. | 2.31 | 2.19E-02 |
| <b>TLE3</b>     | b.t. | n.s. | 2.28 | 1.13E-02 |
| <b>RFFL</b>     | b.t. | n.s. | 2.27 | 1.20E-03 |
| <b>SLC2A6</b>   | b.t. | n.s. | 2.23 | 3.90E-03 |
| <b>RDH13</b>    | b.t. | n.s. | 2.21 | 2.00E-04 |
| <b>TIGD2</b>    | b.t. | n.s. | 2.21 | 3.14E-02 |
| <b>SRGN</b>     | b.t. | n.s. | 2.19 | 1.44E-02 |
| <b>DUSP22</b>   | b.t. | n.s. | 2.15 | 2.90E-03 |
| <b>NFKBIZ</b>   | b.t. | n.s. | 2.14 | 2.29E-02 |
| <b>BIRC3</b>    | b.t. | n.s. | 2.09 | 4.69E-02 |
| <b>CASZ1</b>    | b.t. | n.s. | 2.06 | 1.12E-02 |
| <b>HOXB9</b>    | b.t. | n.s. | 2.04 | 4.10E-02 |
| <b>QTRT1</b>    | b.t. | n.s. | 2.04 | 2.57E-02 |
| <b>CXCR6</b>    | b.t. | n.s. | 2.02 | 1.15E-02 |
| <b>LYN</b>      | b.t. | n.s. | 1.97 | 1.93E-02 |
| <b>SDC4</b>     | b.t. | n.s. | 1.96 | 4.17E-02 |
| <b>MIPEP</b>    | b.t. | n.s. | 1.93 | 4.84E-02 |
| <b>SURF4</b>    | b.t. | n.s. | 1.92 | 3.39E-02 |
| <b>HIST1H4G</b> | b.t. | n.s. | 1.89 | 4.52E-02 |
| <b>RAD51B</b>   | b.t. | n.s. | 1.89 | 8.50E-03 |
| <b>NR6A1</b>    | b.t. | n.s. | 1.88 | 3.61E-02 |
| <b>G0S2</b>     | b.t. | n.s. | 1.86 | 4.09E-02 |
| <b>RLN2</b>     | b.t. | n.s. | 1.85 | 4.29E-02 |
| <b>CUL1</b>     | b.t. | n.s. | 1.83 | 1.69E-02 |

|                |      |      |      |          |
|----------------|------|------|------|----------|
| <b>MSC</b>     | b.t. | n.s. | 1.81 | 2.44E-02 |
| <b>IMPAD1</b>  | b.t. | n.s. | 1.8  | 4.95E-02 |
| <b>SERF1A</b>  | b.t. | n.s. | 1.79 | 3.31E-02 |
| <b>ARID3B</b>  | b.t. | n.s. | 1.78 | 1.46E-02 |
| <b>MELK</b>    | b.t. | n.s. | 1.77 | 9.90E-03 |
| <b>NUSAP1</b>  | b.t. | n.s. | 1.77 | 2.63E-02 |
| <b>TJP2</b>    | b.t. | n.s. | 1.77 | 7.90E-03 |
| <b>P4HA2</b>   | b.t. | n.s. | 1.76 | 4.79E-02 |
| <b>S100A9</b>  | b.t. | n.s. | 1.75 | 4.50E-03 |
| <b>DEPDC4</b>  | b.t. | n.s. | 1.73 | 3.49E-02 |
| <b>DOLPP1</b>  | b.t. | n.s. | 1.73 | 2.76E-02 |
| <b>KDM4A</b>   | b.t. | n.s. | 1.73 | 3.87E-02 |
| <b>NCK2</b>    | b.t. | n.s. | 1.73 | 4.84E-02 |
| <b>USP19</b>   | b.t. | n.s. | 1.73 | 1.32E-02 |
| <b>FAM229B</b> | b.t. | n.s. | 1.72 | 3.58E-02 |
| <b>TMEM254</b> | b.t. | n.s. | 1.72 | 3.22E-02 |
| <b>PORCN</b>   | b.t. | n.s. | 1.71 | 2.66E-02 |
| <b>RPTOR</b>   | b.t. | n.s. | 1.69 | 4.94E-02 |
| <b>CAPN1</b>   | b.t. | n.s. | 1.68 | 2.28E-02 |
| <b>DCTN4</b>   | b.t. | n.s. | 1.66 | 3.41E-02 |
| <b>INAFM2</b>  | b.t. | n.s. | 1.66 | 4.03E-02 |
| <b>PARP2</b>   | b.t. | n.s. | 1.66 | 3.65E-02 |
| <b>KCNK5</b>   | b.t. | n.s. | 1.65 | 3.59E-02 |
| <b>MRPS10</b>  | b.t. | n.s. | 1.65 | 2.03E-02 |
| <b>TRIM24</b>  | b.t. | n.s. | 1.65 | 1.49E-02 |
| <b>DCUN1D1</b> | b.t. | n.s. | 1.64 | 3.26E-02 |
| <b>GPAT4</b>   | b.t. | n.s. | 1.64 | 4.74E-02 |
| <b>UBE4A</b>   | b.t. | n.s. | 1.64 | 2.55E-02 |
| <b>MRPL28</b>  | b.t. | n.s. | 1.63 | 3.20E-02 |

|                 |      |      |       |          |
|-----------------|------|------|-------|----------|
| <b>ETV3</b>     | b.t. | n.s. | 1.62  | 1.10E-02 |
| <b>KLC2</b>     | b.t. | n.s. | 1.62  | 2.18E-02 |
| <b>TGIF2</b>    | b.t. | n.s. | 1.62  | 8.10E-03 |
| <b>C5orf63</b>  | b.t. | n.s. | 1.6   | 4.80E-02 |
| <b>DDX6</b>     | b.t. | n.s. | 1.6   | 1.25E-02 |
| <b>STOML1</b>   | b.t. | n.s. | 1.6   | 1.00E-03 |
| <b>INTS6</b>    | b.t. | n.s. | 1.59  | 5.40E-03 |
| <b>THEMIS2</b>  | b.t. | n.s. | 1.59  | 4.78E-02 |
| <b>CNNM1</b>    | b.t. | n.s. | 1.58  | 1.40E-02 |
| <b>CRTC2</b>    | b.t. | n.s. | 1.58  | 9.20E-03 |
| <b>EIF3L</b>    | b.t. | n.s. | 1.58  | 6.10E-03 |
| <b>PTGER2</b>   | b.t. | n.s. | 1.57  | 1.94E-02 |
| <b>VN1R3</b>    | b.t. | n.s. | 1.57  | 3.55E-02 |
| <b>SLC45A3</b>  | b.t. | n.s. | 1.56  | 1.10E-03 |
| <b>NPAT</b>     | b.t. | n.s. | 1.55  | 4.16E-02 |
| <b>PIGV</b>     | b.t. | n.s. | 1.55  | 3.05E-02 |
| <b>RAB3IL1</b>  | b.t. | n.s. | 1.55  | 2.93E-02 |
| <b>ZDHHC11B</b> | b.t. | n.s. | 1.55  | 1.90E-03 |
| <b>ZDHHC3</b>   | b.t. | n.s. | 1.54  | 1.88E-02 |
| <b>KIAA1586</b> | b.t. | n.s. | 1.54  | 5.60E-03 |
| <b>PPIC</b>     | b.t. | n.s. | 1.54  | 3.88E-02 |
| <b>TAB2</b>     | b.t. | n.s. | 1.54  | 4.13E-02 |
| <b>ASXL1</b>    | b.t. | n.s. | 1.53  | 2.81E-02 |
| <b>MLIP</b>     | b.t. | n.s. | 1.52  | 8.00E-04 |
| <b>ONECUT2</b>  | b.t. | n.s. | 1.52  | 1.54E-02 |
| <b>TBC1D21</b>  | b.t. | n.s. | 1.51  | 4.00E-03 |
| <b>APOA4</b>    | b.t. | n.s. | 1.5   | 4.38E-02 |
| <b>ZDHHC20</b>  | b.t. | n.s. | -1.5  | 2.21E-02 |
| <b>C16orf54</b> | b.t. | n.s. | -1.51 | 2.78E-02 |

|            |      |      |       |          |
|------------|------|------|-------|----------|
| HEXIM2     | b.t. | n.s. | -1.51 | 1.74E-02 |
| COLEC10    | b.t. | n.s. | -1.51 | 3.38E-02 |
| SEC62      | b.t. | n.s. | -1.51 | 4.24E-02 |
| ST6GALNAC4 | b.t. | n.s. | -1.51 | 2.60E-02 |
| ZNF181     | b.t. | n.s. | -1.51 | 2.75E-02 |
| GSTO2      | b.t. | n.s. | -1.52 | 1.15E-02 |
| KLF9       | b.t. | n.s. | -1.52 | 3.20E-03 |
| PIAS2      | b.t. | n.s. | -1.52 | 4.98E-02 |
| ZNF510     | b.t. | n.s. | -1.52 | 1.52E-02 |
| ARFGEF2    | b.t. | n.s. | -1.53 | 2.72E-02 |
| ARHGEF10L  | b.t. | n.s. | -1.53 | 9.00E-04 |
| RASSF7     | b.t. | n.s. | -1.53 | 3.00E-03 |
| TTC24      | b.t. | n.s. | -1.53 | 8.20E-03 |
| IL20       | b.t. | n.s. | -1.54 | 2.01E-02 |
| BCAS4      | b.t. | n.s. | -1.54 | 3.77E-02 |
| ACTR10     | b.t. | n.s. | -1.55 | 5.00E-03 |
| AUH        | b.t. | n.s. | -1.55 | 1.18E-02 |
| BAK1       | b.t. | n.s. | -1.55 | 3.54E-02 |
| FECH       | b.t. | n.s. | -1.55 | 1.94E-02 |
| U2AF1L4    | b.t. | n.s. | -1.55 | 3.31E-02 |
| GRAPL      | b.t. | n.s. | -1.56 | 1.12E-02 |
| KCTD7      | b.t. | n.s. | -1.56 | 3.12E-02 |
| RGS8       | b.t. | n.s. | -1.56 | 2.22E-02 |
| SLC26A7    | b.t. | n.s. | -1.56 | 3.25E-02 |
| YIPF7      | b.t. | n.s. | -1.56 | 3.02E-02 |
| DENND6A    | b.t. | n.s. | -1.57 | 1.04E-02 |
| DISC1      | b.t. | n.s. | -1.57 | 3.80E-03 |
| LIPT1      | b.t. | n.s. | -1.57 | 2.30E-03 |
| CTBP1      | b.t. | n.s. | -1.58 | 4.32E-02 |

|                |      |      |       |          |
|----------------|------|------|-------|----------|
| <b>FNIP1</b>   | b.t. | n.s. | -1.58 | 4.66E-02 |
| <b>NEK5</b>    | b.t. | n.s. | -1.58 | 2.10E-03 |
| <b>RASIP1</b>  | b.t. | n.s. | -1.58 | 4.00E-04 |
| <b>UPF3A</b>   | b.t. | n.s. | -1.58 | 2.80E-03 |
| <b>LNX2</b>    | b.t. | n.s. | -1.59 | 3.49E-02 |
| <b>TMSB10</b>  | b.t. | n.s. | -1.59 | 4.53E-02 |
| <b>ING1</b>    | b.t. | n.s. | -1.6  | 6.30E-03 |
| <b>CUTA</b>    | b.t. | n.s. | -1.6  | 1.29E-02 |
| <b>DMC1</b>    | b.t. | n.s. | -1.6  | 3.82E-02 |
| <b>ZNF174</b>  | b.t. | n.s. | -1.6  | 1.37E-02 |
| <b>NBPF3</b>   | b.t. | n.s. | -1.61 | 4.34E-02 |
| <b>SIMC1</b>   | b.t. | n.s. | -1.61 | 4.31E-02 |
| <b>FOXO3</b>   | b.t. | n.s. | -1.62 | 3.96E-02 |
| <b>OSTM1</b>   | b.t. | n.s. | -1.62 | 2.56E-02 |
| <b>RTP1</b>    | b.t. | n.s. | -1.63 | 1.30E-02 |
| <b>GDPD4</b>   | b.t. | n.s. | -1.63 | 2.04E-02 |
| <b>MEPE</b>    | b.t. | n.s. | -1.63 | 6.70E-03 |
| <b>TSC22D1</b> | b.t. | n.s. | -1.63 | 9.00E-04 |
| <b>RHOT1</b>   | b.t. | n.s. | -1.64 | 1.93E-02 |
| <b>CMC2</b>    | b.t. | n.s. | -1.65 | 3.51E-02 |
| <b>MAST3</b>   | b.t. | n.s. | -1.65 | 2.50E-02 |
| <b>ABRA</b>    | b.t. | n.s. | -1.66 | 1.44E-02 |
| <b>BARD1</b>   | b.t. | n.s. | -1.66 | 4.00E-03 |
| <b>KIF27</b>   | b.t. | n.s. | -1.66 | 2.85E-02 |
| <b>LSM10</b>   | b.t. | n.s. | -1.67 | 2.98E-02 |
| <b>METTL25</b> | b.t. | n.s. | -1.67 | 4.31E-02 |
| <b>TBL1X</b>   | b.t. | n.s. | -1.67 | 4.29E-02 |
| <b>CCDC158</b> | b.t. | n.s. | -1.68 | 1.57E-02 |
| <b>TTLL1</b>   | b.t. | n.s. | -1.68 | 4.06E-02 |

|                 |      |      |       |          |
|-----------------|------|------|-------|----------|
| <b>COL6A5</b>   | b.t. | n.s. | -1.69 | 2.70E-03 |
| <b>HERC4</b>    | b.t. | n.s. | -1.69 | 4.33E-02 |
| <b>PMM1</b>     | b.t. | n.s. | -1.69 | 3.70E-02 |
| <b>ING2</b>     | b.t. | n.s. | -1.7  | 7.20E-03 |
| <b>ZNF705G</b>  | b.t. | n.s. | -1.7  | 2.08E-02 |
| <b>STK25</b>    | b.t. | n.s. | -1.7  | 3.86E-02 |
| <b>PPM1D</b>    | b.t. | n.s. | -1.71 | 1.44E-02 |
| <b>CASP9</b>    | b.t. | n.s. | -1.72 | 5.60E-03 |
| <b>GIN1</b>     | b.t. | n.s. | -1.72 | 1.79E-02 |
| <b>GNA13</b>    | b.t. | n.s. | -1.72 | 3.10E-02 |
| <b>FXVD7</b>    | b.t. | n.s. | -1.73 | 3.29E-02 |
| <b>MGAT1</b>    | b.t. | n.s. | -1.73 | 4.10E-03 |
| <b>MAP3K2</b>   | b.t. | n.s. | -1.74 | 2.96E-02 |
| <b>RASGEF1A</b> | b.t. | n.s. | -1.74 | 1.22E-02 |
| <b>FABP3</b>    | b.t. | n.s. | -1.75 | 9.20E-03 |
| <b>LIG1</b>     | b.t. | n.s. | -1.75 | 1.61E-02 |
| <b>RAB37</b>    | b.t. | n.s. | -1.75 | 7.20E-03 |
| <b>REEP3</b>    | b.t. | n.s. | -1.75 | 3.30E-03 |
| <b>STRN</b>     | b.t. | n.s. | -1.75 | 2.85E-02 |
| <b>TMOD2</b>    | b.t. | n.s. | -1.75 | 1.42E-02 |
| <b>USP21</b>    | b.t. | n.s. | -1.75 | 2.07E-02 |
| <b>KBTBD8</b>   | b.t. | n.s. | -1.76 | 4.03E-02 |
| <b>SLC12A7</b>  | b.t. | n.s. | -1.76 | 1.73E-02 |
| <b>ABRA1</b>    | b.t. | n.s. | -1.77 | 1.68E-02 |
| <b>CHAMP1</b>   | b.t. | n.s. | -1.77 | 4.40E-03 |
| <b>ESR2</b>     | b.t. | n.s. | -1.77 | 3.80E-03 |
| <b>DENND1A</b>  | b.t. | n.s. | -1.79 | 4.67E-02 |
| <b>PEPD</b>     | b.t. | n.s. | -1.79 | 1.62E-02 |
| <b>SLC35C1</b>  | b.t. | n.s. | -1.8  | 9.30E-03 |

|                   |      |      |       |          |
|-------------------|------|------|-------|----------|
| <b>RFC1</b>       | b.t. | n.s. | -1.8  | 2.10E-02 |
| <b>ZNF846</b>     | b.t. | n.s. | -1.8  | 1.29E-02 |
| <b>EGR3</b>       | b.t. | n.s. | -1.81 | 4.34E-02 |
| <b>MYBL1</b>      | b.t. | n.s. | -1.82 | 4.54E-02 |
| <b>DYRK1B</b>     | b.t. | n.s. | -1.84 | 4.54E-02 |
| <b>C14orf28</b>   | b.t. | n.s. | -1.84 | 2.60E-02 |
| <b>GNAS</b>       | b.t. | n.s. | -1.84 | 3.39E-02 |
| <b>UBE2B</b>      | b.t. | n.s. | -1.84 | 3.08E-02 |
| <b>EGLN2</b>      | b.t. | n.s. | -1.85 | 2.20E-03 |
| <b>TMCC1</b>      | b.t. | n.s. | -1.85 | 4.07E-02 |
| <b>SLF2</b>       | b.t. | n.s. | -1.87 | 3.08E-02 |
| <b>PJA1</b>       | b.t. | n.s. | -1.88 | 1.27E-02 |
| <b>STK26</b>      | b.t. | n.s. | -1.88 | 1.30E-03 |
| <b>TTL</b>        | b.t. | n.s. | -1.88 | 1.40E-03 |
| <b>FLCN</b>       | b.t. | n.s. | -1.89 | 3.11E-02 |
| <b>MNT</b>        | b.t. | n.s. | -1.89 | 2.27E-02 |
| <b>GMCL1</b>      | b.t. | n.s. | -1.9  | 8.70E-03 |
| <b>CKLF-CMTM1</b> | b.t. | n.s. | -1.91 | 3.66E-02 |
| <b>ITGAL</b>      | b.t. | n.s. | -1.91 | 2.58E-02 |
| <b>SCAMP1</b>     | b.t. | n.s. | -1.92 | 4.50E-03 |
| <b>ARAP1</b>      | b.t. | n.s. | -1.93 | 1.11E-02 |
| <b>METRNL</b>     | b.t. | n.s. | -1.93 | 5.70E-03 |
| <b>ACAP1</b>      | b.t. | n.s. | -1.94 | 4.36E-02 |
| <b>NIN</b>        | b.t. | n.s. | -1.94 | 1.51E-02 |
| <b>VEGFB</b>      | b.t. | n.s. | -1.95 | 3.35E-02 |
| <b>EPB41L4A</b>   | b.t. | n.s. | -1.96 | 4.63E-02 |
| <b>FBXW11</b>     | b.t. | n.s. | -1.96 | 4.63E-02 |
| <b>TNFSF12</b>    | b.t. | n.s. | -1.96 | 1.76E-02 |
| <b>LRRC25</b>     | b.t. | n.s. | -1.97 | 7.90E-03 |

|         |      |      |       |          |
|---------|------|------|-------|----------|
| KANSL1L | b.t. | n.s. | -1.97 | 4.52E-02 |
| CCDC91  | b.t. | n.s. | -1.98 | 8.40E-03 |
| UMAD1   | b.t. | n.s. | -1.98 | 3.11E-02 |
| TMEM156 | b.t. | n.s. | -1.99 | 2.24E-02 |
| FMO5    | b.t. | n.s. | -2.01 | 1.20E-03 |
| MCOLN1  | b.t. | n.s. | -2.02 | 7.00E-03 |
| TRIM69  | b.t. | n.s. | -2.02 | 5.50E-03 |
| NUDT3   | b.t. | n.s. | -2.03 | 1.15E-02 |
| GRK6    | b.t. | n.s. | -2.05 | 1.20E-03 |
| HEXA    | b.t. | n.s. | -2.06 | 1.97E-02 |
| WNT16   | b.t. | n.s. | -2.09 | 1.73E-02 |
| ACVR1   | b.t. | n.s. | -2.1  | 4.96E-02 |
| KLK1    | b.t. | n.s. | -2.1  | 5.70E-03 |
| MBD5    | b.t. | n.s. | -2.1  | 1.32E-02 |
| HTRA3   | b.t. | n.s. | -2.12 | 4.52E-02 |
| SERTAD1 | b.t. | n.s. | -2.14 | 3.36E-02 |
| ADD3    | b.t. | n.s. | -2.15 | 4.54E-02 |
| CASP3   | b.t. | n.s. | -2.15 | 1.93E-02 |
| CLEC2D  | b.t. | n.s. | -2.15 | 2.04E-02 |
| OSBPL3  | b.t. | n.s. | -2.18 | 2.51E-02 |
| STK24   | b.t. | n.s. | -2.18 | 3.30E-03 |
| KANK1   | b.t. | n.s. | -2.19 | 3.26E-02 |
| RAB20   | b.t. | n.s. | -2.22 | 1.30E-03 |
| MAX     | b.t. | n.s. | -2.23 | 1.50E-03 |
| SLC37A2 | b.t. | n.s. | -2.25 | 2.45E-02 |
| CD5     | b.t. | n.s. | -2.29 | 1.80E-02 |
| ZHX3    | b.t. | n.s. | -2.29 | 4.40E-02 |
| IL12B   | b.t. | n.s. | -2.34 | 8.60E-03 |
| COTL1   | b.t. | n.s. | -2.34 | 1.95E-02 |

|                  |      |      |       |          |
|------------------|------|------|-------|----------|
| <b>CSRNP2</b>    | b.t. | n.s. | -2.34 | 1.57E-02 |
| <b>PANK1</b>     | b.t. | n.s. | -2.36 | 4.20E-02 |
| <b>RASA3</b>     | b.t. | n.s. | -2.38 | 1.42E-02 |
| <b>LDLRAP1</b>   | b.t. | n.s. | -2.39 | 3.45E-02 |
| <b>MPP7</b>      | b.t. | n.s. | -2.41 | 2.40E-02 |
| <b>ASAH1</b>     | b.t. | n.s. | -2.45 | 1.40E-02 |
| <b>TNFRSF13B</b> | b.t. | n.s. | -2.52 | 3.80E-02 |
| <b>ACACB</b>     | b.t. | n.s. | -2.53 | 4.13E-02 |
| <b>TTC3</b>      | b.t. | n.s. | -2.53 | 2.92E-02 |
| <b>RNASEH2B</b>  | b.t. | n.s. | -2.57 | 2.49E-02 |
| <b>ARID5B</b>    | b.t. | n.s. | -2.59 | 1.51E-02 |
| <b>CEP68</b>     | b.t. | n.s. | -2.62 | 2.34E-02 |
| <b>TNFRSF18</b>  | b.t. | n.s. | -2.68 | 4.06E-02 |
| <b>SBF2</b>      | b.t. | n.s. | -2.68 | 3.78E-02 |
| <b>CAB39L</b>    | b.t. | n.s. | -2.74 | 4.55E-02 |
| <b>STX10</b>     | b.t. | n.s. | -2.75 | 4.60E-03 |
| <b>TMC8</b>      | b.t. | n.s. | -2.77 | 1.20E-03 |
| <b>LCP2</b>      | b.t. | n.s. | -2.9  | 1.81E-02 |
| <b>ELMSAN1</b>   | b.t. | n.s. | -2.98 | 1.70E-03 |
| <b>CCDC68</b>    | b.t. | n.s. | -3.08 | 2.28E-02 |
| <b>DDIT3</b>     | b.t. | n.s. | -3.21 | 2.60E-03 |
| <b>LRMP</b>      | b.t. | n.s. | -3.47 | 2.31E-02 |
| <b>SLC27A3</b>   | b.t. | n.s. | -3.48 | 4.00E-04 |
| <b>FBXO15</b>    | b.t. | n.s. | -4.15 | 2.87E-02 |
| <b>VAT1</b>      | b.t. | n.s. | -4.19 | 5.40E-03 |
| <b>RHOBTB2</b>   | b.t. | n.s. | -4.52 | 1.54E-02 |
| <b>PNOC</b>      | b.t. | n.s. | -4.82 | 3.10E-03 |
| <b>MRC1</b>      | b.t. | n.s. | -4.88 | 4.17E-02 |
| <b>RGS2</b>      | b.t. | n.s. | -6.21 | 3.84E-02 |

|              |      |      |       |          |
|--------------|------|------|-------|----------|
| <b>EGR2</b>  | b.t. | n.s. | -7.13 | 2.90E-03 |
| <b>ARL4C</b> | b.t. | n.s. | -8.22 | 1.21E-02 |

---

n.s. non significant

b.t. below threshold

**Supplementary Table 4. Differentially expressed miRNA by agonist mix in absence (C vs A) or presence of Ibrutinib (D vs B).**

| <b>TP53altered</b> | <b>Fold Change (CvsA)</b> | <b>P-val (CvsA)</b> | <b>Fold Change (DvsB)</b> | <b>P-val (DvsB)</b> |
|--------------------|---------------------------|---------------------|---------------------------|---------------------|
| hsa-miR-1260a      | 1.5                       | 4.12E-02            | b.t.                      | n.s.                |
| hsa-miR-1268b      | 1.3                       | 2.42E-02            | b.t.                      | n.s.                |
| hsa-miR-155-5p     | 1.5                       | 3.62E-02            | 2.5                       | 1.28E-02            |
| hsa-miR-20a-5p     | 1.8                       | 2.17E-02            | 3.26                      | 4.19E-02            |
| hsa-miR-29b-1-5p   | 2.3                       | 2.73E-02            | b.t.                      | n.s.                |
| hsa-miR-3162-5p    | 1.3                       | 4.44E-02            | 7.86                      | 1.80E-03            |
| hsa-miR-4286       | 1.5                       | 3.67E-02            | 3.8                       | 5.80E-03            |
| hsa-miR-431-3p     | 9.4                       | 6.10E-03            | b.t.                      | n.s.                |
| hsa-miR-6165       | 1.4                       | 2.75E-02            | b.t.                      | n.s.                |
| hsa-miR-6829-5p    | 1.7                       | 3.55E-02            | b.t.                      | n.s.                |
| hsa-miR-7114-5p    | 1.7                       | 4.80E-02            | 9.1                       | 1.00E-03            |
| hsa-miR-770-5p     | 9.0                       | 1.84E-02            | b.t.                      | n.s.                |
| hsa-miR-92a-3p     | 1.5                       | 4.84E-02            | b.t.                      | n.s.                |
| hsa-miR-150-5p     | -1.2                      | 4.23E-02            | 6.84                      | 2.15E-02            |
| hsa-miR-6716-3p    | -9.8                      | 4.49E-02            | 4.12                      | 1.02E-02            |
| hsa-miR-365a-3p    | b.t.                      | n.s.                | 8.0                       | 2.08E-02            |
| hsa-miR-4436b-5p   | b.t.                      | n.s.                | 6.5                       | 4.97E-02            |
| hsa-miR-132-3p     | b.t.                      | n.s.                | -24.8                     | 1.79E-02            |

| WT (Aviano)      | Fold Change (CvsA) | P-val (CvsA) | Fold Change (DvsB) | P-val (DvsB) |
|------------------|--------------------|--------------|--------------------|--------------|
| hsa-miR-155-3p   | 8.0                | 2.22E-02     | 5.4                | 4.31E-03     |
| hsa-miR-18b-5p   | 7.0                | 1.44E-02     | b.t.               | n.s.         |
| hsa-miR-221-5p   | 5.9                | 4.97E-02     | b.t.               | n.s.         |
| hsa-miR-221-3p   | 5.1                | 1.33E-02     | 5.9                | 2.40E-02     |
| hsa-miR-29b-1-5p | 4.7                | 3.72E-02     | b.t.               | n.s.         |
| hsa-miR-6840-3p  | 3.8                | 4.79E-02     | b.t.               | n.s.         |
| hsa-miR-17-5p    | 2.1                | 4.40E-03     | 1.9                | 1.81E-02     |
| hsa-miR-155-5p   | 2.0                | 1.43E-02     | 1.8                | 2.43E-02     |
| hsa-miR-20b-5p   | 1.9                | 2.17E-02     | b.t.               | n.s.         |
| hsa-miR-20a-5p   | 1.9                | 5.99E-03     | b.t.               | n.s.         |
| hsa-miR-7114-5p  | 1.9                | 4.42E-03     | b.t.               | n.s.         |
| hsa-miR-6826-5p  | 1.9                | 1.10E-02     | b.t.               | n.s.         |
| hsa-miR-212-3p   | 1.9                | 3.35E-02     | b.t.               | n.s.         |
| hsa-miR-92a-3p   | 1.8                | 4.96E-03     | 1.6                | 3.62E-02     |
| hsa-miR-1233-5p  | 1.7                | 2.59E-02     | b.t.               | n.s.         |
| hsa-miR-34a-5p   | 1.6                | 1.98E-02     | b.t.               | n.s.         |
| hsa-miR-211-3p   | 1.5                | 1.70E-02     | b.t.               | n.s.         |
| hsa-miR-6085     | 1.5                | 4.45E-02     | b.t.               | n.s.         |
| hsa-miR-6829-5p  | 1.5                | 4.99E-03     | 1.3                | 4.92E-02     |
| hsa-miR-939-5p   | 1.5                | 2.51E-03     | b.t.               | n.s.         |
| hsa-miR-4286     | 1.5                | 1.97E-02     | b.t.               | n.s.         |
| hsa-miR-19b-3p   | 1.5                | 3.39E-02     | b.t.               | n.s.         |
| hsa-miR-7152-3p  | 1.5                | 3.07E-02     | b.t.               | n.s.         |
| hsa-miR-5739     | 1.5                | 7.29E-03     | 1.3                | 4.50E-02     |
| hsa-miR-6808-5p  | 1.4                | 4.07E-02     | b.t.               | n.s.         |
| hsa-miR-6165     | 1.4                | 1.91E-02     | b.t.               | n.s.         |
| hsa-miR-6763-5p  | 1.4                | 2.51E-02     | b.t.               | n.s.         |

|                 |       |          |      |          |
|-----------------|-------|----------|------|----------|
| hsa-miR-7977    | 1.4   | 1.68E-02 | 1.3  | 2.34E-02 |
| hsa-miR-6807-5p | 1.3   | 2.94E-02 | b.t. | n.s.     |
| hsa-miR-6740-5p | 1.2   | 3.69E-02 | b.t. | n.s.     |
| hsa-miR-4515    | -1.2  | 7.01E-03 | b.t. | n.s.     |
| hsa-miR-6891-5p | -1.2  | 4.12E-02 | b.t. | n.s.     |
| hsa-miR-26a-5p  | -1.3  | 3.80E-02 | b.t. | n.s.     |
| hsa-miR-6126    | -1.4  | 4.12E-02 | b.t. | n.s.     |
| hsa-miR-3665    | -1.5  | 4.60E-02 | b.t. | n.s.     |
| hsa-miR-1290    | -1.5  | 2.00E-02 | -1.5 | 9.86E-03 |
| hsa-miR-1915-3p | -1.5  | 3.60E-02 | b.t. | n.s.     |
| hsa-miR-5787    | -1.6  | 3.32E-02 | b.t. | n.s.     |
| hsa-miR-6088    | -1.6  | 3.47E-02 | b.t. | n.s.     |
| hsa-miR-4466    | -1.7  | 1.52E-02 | b.t. | n.s.     |
| hsa-miR-5703    | -1.7  | 4.23E-02 | b.t. | n.s.     |
| hsa-miR-197-3p  | -1.7  | 2.88E-02 | b.t. | n.s.     |
| hsa-miR-6727-5p | -1.9  | 3.30E-02 | b.t. | n.s.     |
| hsa-miR-6752-3p | -2.1  | 3.97E-02 | b.t. | n.s.     |
| hsa-miR-1908-3p | -2.8  | 4.96E-02 | b.t. | n.s.     |
| hsa-miR-3934-5p | -3.2  | 3.50E-02 | b.t. | n.s.     |
| hsa-miR-4746-3p | -4.8  | 8.80E-03 | b.t. | n.s.     |
| hsa-miR-564     | -6.1  | 2.40E-02 | b.t. | n.s.     |
| hsa-miR-3648    | -6.2  | 3.64E-02 | b.t. | n.s.     |
| hsa-miR-584-5p  | -7.7  | 3.73E-02 | b.t. | n.s.     |
| hsa-miR-874-3p  | -9.6  | 3.83E-03 | -5.7 | 1.87E-02 |
| hsa-miR-2276-3p | -10.8 | 2.03E-02 | b.t. | n.s.     |
| hsa-miR-770-5p  | b.t.  | n.s.     | 7.9  | 7.20E-03 |
| hsa-miR-202-3p  | b.t.  | n.s.     | 7.9  | 1.63E-02 |
| hsa-miR-4749-3p | b.t.  | n.s.     | 7.6  | 1.05E-02 |
| hsa-miR-4252    | b.t.  | n.s.     | 6.9  | 4.17E-02 |

|                        |      |      |       |          |
|------------------------|------|------|-------|----------|
| <b>hsa-miR-19a-3p</b>  | b.t. | n.s. | 1.5   | 4.87E-02 |
| <b>hsa-miR-8069</b>    | b.t. | n.s. | -1.6  | 1.39E-02 |
| <b>hsa-miR-132-5p</b>  | b.t. | n.s. | -5.6  | 4.25E-02 |
| <b>hsa-miR-6073</b>    | b.t. | n.s. | -6.4  | 8.77E-03 |
| <b>hsa-miR-4745-5p</b> | b.t. | n.s. | -8.0  | 2.97E-03 |
| <b>hsa-miR-132-3p</b>  | b.t. | n.s. | -46.4 | 1.15E-03 |

---

**Supplementary Table 5a. Significantly enriched pathways (Reactome) of DE coding genes by agonist mix treatment in TP53 altered CLL cases.**

| Category           | Term          | Description                                                                        | LogP   | Log(q-value) | InTerm_InList |
|--------------------|---------------|------------------------------------------------------------------------------------|--------|--------------|---------------|
| Reactome Gene Sets | R-HSA-1280215 | Cytokine Signaling in Immune system                                                | -25.06 | -20.72       | 76/715        |
| Reactome Gene Sets | R-HSA-449147  | Signaling by Interleukins                                                          | -13.58 | -9.53        | 45/462        |
| Reactome Gene Sets | R-HSA-1280218 | Adaptive Immune System                                                             | -12.45 | -8.61        | 58/769        |
| Reactome Gene Sets | R-HSA-909733  | Interferon alpha/beta signaling                                                    | -11.54 | -8.04        | 17/72         |
| Reactome Gene Sets | R-HSA-5663202 | Diseases of signal transduction by growth factor receptors and second messengers   | -10.21 | -7.00        | 38/433        |
| Reactome Gene Sets | R-HSA-2454202 | Fc epsilon receptor (FCERI) signaling                                              | -9.58  | -6.49        | 20/134        |
| Reactome Gene Sets | R-HSA-913531  | Interferon Signaling                                                               | -9.39  | -6.38        | 24/199        |
| Reactome Gene Sets | R-HSA-983705  | Signaling by the B Cell Receptor (BCR)                                             | -8.36  | -5.64        | 17/112        |
| Reactome Gene Sets | R-HSA-5607764 | CLEC7A (Dectin-1) signaling                                                        | -8.18  | -5.54        | 16/101        |
| Reactome Gene Sets | R-HSA-3700989 | Transcriptional Regulation by TP53                                                 | -8.19  | -5.54        | 31/362        |
| Reactome Gene Sets | R-HSA-9006925 | Intracellular signaling by second messengers                                       | -7.99  | -5.40        | 28/309        |
| Reactome Gene Sets | R-HSA-451927  | Interleukin-2 family signaling                                                     | -7.97  | -5.39        | 11/44         |
| Reactome Gene Sets | R-HSA-9006934 | Signaling by Receptor Tyrosine Kinases                                             | -7.96  | -5.39        | 38/521        |
| Reactome Gene Sets | R-HSA-1257604 | PIP3 activates AKT signaling                                                       | -7.48  | -4.98        | 25/267        |
| Reactome Gene Sets | R-HSA-2586552 | Signaling by Leptin                                                                | -6.93  | -4.59        | 6/11          |
| Reactome Gene Sets | R-HSA-9006335 | Signaling by Erythropoietin                                                        | -6.87  | -4.56        | 8/25          |
| Reactome Gene Sets | R-HSA-446652  | Interleukin-1 family signaling                                                     | -6.84  | -4.54        | 17/141        |
| Reactome Gene Sets | R-HSA-512988  | Interleukin-3, Interleukin-5 and GM-CSF signaling                                  | -6.49  | -4.25        | 10/48         |
| Reactome Gene Sets | R-HSA-202403  | TCR signaling                                                                      | -6.31  | -4.09        | 15/120        |
| Reactome Gene Sets | R-HSA-5621481 | C-type lectin receptors (CLRs)                                                     | -6.07  | -3.88        | 16/142        |
| Reactome Gene Sets | R-HSA-983695  | Antigen activates B Cell Receptor (BCR) leading to generation of second messengers | -5.95  | -3.78        | 8/32          |
| Reactome Gene Sets | R-HSA-1433557 | Signaling by SCF-KIT                                                               | -5.92  | -3.76        | 9/43          |
| Reactome Gene Sets | R-HSA-982772  | Growth hormone receptor signaling                                                  | -5.77  | -3.65        | 7/24          |
| Reactome Gene Sets | R-HSA-2219528 | PI3K/AKT Signaling in Cancer                                                       | -5.55  | -3.47        | 13/104        |
| Reactome Gene Sets | R-HSA-877300  | Interferon gamma signaling                                                         | -5.42  | -3.36        | 12/91         |
| Reactome Gene Sets | R-HSA-9607240 | FLT3 Signaling                                                                     | -5.34  | -3.30        | 8/38          |
| Reactome Gene Sets | R-HSA-3858494 | Beta-catenin independent WNT signaling                                             | -5.23  | -3.21        | 15/146        |

|                    |               |                                                                                        |       |       |        |
|--------------------|---------------|----------------------------------------------------------------------------------------|-------|-------|--------|
| Reactome Gene Sets | R-HSA-9020558 | Interleukin-2 signaling                                                                | -5.12 | -3.11 | 5/12   |
| Reactome Gene Sets | R-HSA-9669938 | Signaling by KIT in disease                                                            | -5.09 | -3.09 | 6/20   |
| Reactome Gene Sets | R-HSA-9670439 | Signaling by phosphorylated juxtamembrane, extracellular and kinase domain KIT mutants | -5.09 | -3.09 | 6/20   |
| Reactome Gene Sets | R-HSA-1168372 | Downstream signaling events of B Cell Receptor (BCR)                                   | -5.04 | -3.05 | 11/83  |
| Reactome Gene Sets | R-HSA-5673001 | RAF/MAP kinase cascade                                                                 | -4.86 | -2.92 | 21/280 |
| Reactome Gene Sets | R-HSA-9020702 | Interleukin-1 signaling                                                                | -4.86 | -2.92 | 12/103 |
| Reactome Gene Sets | R-HSA-2871796 | FCERI mediated MAPK activation                                                         | -4.86 | -2.92 | 7/32   |
| Reactome Gene Sets | R-HSA-5683057 | MAPK family signaling cascades                                                         | -4.85 | -2.92 | 23/325 |
| Reactome Gene Sets | R-HSA-9027283 | Erythropoietin activates STAT5                                                         | -4.84 | -2.92 | 4/7    |
| Reactome Gene Sets | R-HSA-109581  | Apoptosis                                                                              | -4.73 | -2.84 | 16/180 |
| Reactome Gene Sets | R-HSA-8983432 | Interleukin-15 signaling                                                               | -4.74 | -2.84 | 5/14   |
| Reactome Gene Sets | R-HSA-5684996 | MAPK1/MAPK3 signaling                                                                  | -4.72 | -2.84 | 21/286 |
| Reactome Gene Sets | R-HSA-69242   | S Phase                                                                                | -4.65 | -2.79 | 15/163 |
| Reactome Gene Sets | R-HSA-453279  | Mitotic G1 phase and G1/S transition                                                   | -4.48 | -2.66 | 14/149 |
| Reactome Gene Sets | R-HSA-8854691 | Interleukin-20 family signaling                                                        | -4.48 | -2.65 | 6/25   |
| Reactome Gene Sets | R-HSA-69206   | G1/S Transition                                                                        | -4.45 | -2.64 | 13/131 |
| Reactome Gene Sets | R-HSA-8983711 | OAS antiviral response                                                                 | -4.31 | -2.52 | 4/9    |
| Reactome Gene Sets | R-HSA-195721  | Signaling by WNT                                                                       | -4.24 | -2.46 | 22/332 |
| Reactome Gene Sets | R-HSA-109606  | Intrinsic Pathway for Apoptosis                                                        | -4.11 | -2.36 | 8/55   |
| Reactome Gene Sets | R-HSA-9020958 | Interleukin-21 signaling                                                               | -4.09 | -2.35 | 4/10   |
| Reactome Gene Sets | R-HSA-69620   | Cell Cycle Checkpoints                                                                 | -4.08 | -2.34 | 20/293 |
| Reactome Gene Sets | R-HSA-2424491 | DAP12 signaling                                                                        | -4.00 | -2.28 | 6/30   |
| Reactome Gene Sets | R-HSA-9674555 | Signaling by CSF3 (G-CSF)                                                              | -4.00 | -2.28 | 6/30   |
| Reactome Gene Sets | R-HSA-69481   | G2/M Checkpoints                                                                       | -3.94 | -2.23 | 14/167 |
| Reactome Gene Sets | R-HSA-5357801 | Programmed Cell Death                                                                  | -3.93 | -2.21 | 16/210 |
| Reactome Gene Sets | R-HSA-8878159 | Transcriptional regulation by RUNX3                                                    | -3.73 | -2.06 | 10/96  |
| Reactome Gene Sets | R-HSA-1169410 | Antiviral mechanism by IFN-stimulated genes                                            | -3.67 | -2.01 | 9/80   |
| Reactome Gene Sets | R-HSA-5633007 | Regulation of TP53 Activity                                                            | -3.57 | -1.93 | 13/160 |
| Reactome Gene Sets | R-HSA-1266695 | Interleukin-7 signaling                                                                | -3.54 | -1.91 | 6/36   |

|                    |               |                                                             |       |       |        |
|--------------------|---------------|-------------------------------------------------------------|-------|-------|--------|
| Reactome Gene Sets | R-HSA-69239   | Synthesis of DNA                                            | -3.52 | -1.89 | 11/121 |
| Reactome Gene Sets | R-HSA-111459  | Activation of caspases through apoptosome-mediated cleavage | -3.49 | -1.87 | 3/6    |
| Reactome Gene Sets | R-HSA-69656   | Cyclin A:Cdk2-associated events at S phase entry            | -3.47 | -1.85 | 9/85   |
| Reactome Gene Sets | R-HSA-9705462 | Inactivation of CSF3 (G-CSF) signaling                      | -3.41 | -1.81 | 5/25   |
| Reactome Gene Sets | R-HSA-983169  | Class I MHC mediated antigen processing & presentation      | -3.39 | -1.80 | 22/381 |
| Reactome Gene Sets | R-HSA-6811558 | PI5P, PP2A and IER3 Regulate PI3K/AKT Signaling             | -3.38 | -1.79 | 10/106 |
| Reactome Gene Sets | R-HSA-4641257 | Degradation of AXIN                                         | -3.30 | -1.72 | 7/55   |
| Reactome Gene Sets | R-HSA-111463  | SMAC (DIABLO) binds to IAPs                                 | -3.26 | -1.69 | 3/7    |
| Reactome Gene Sets | R-HSA-111464  | SMAC(DIABLO)-mediated dissociation of IAP:caspase complexes | -3.26 | -1.69 | 3/7    |
| Reactome Gene Sets | R-HSA-4086400 | PCP/CE pathway                                              | -3.21 | -1.66 | 9/92   |
| Reactome Gene Sets | R-HSA-9703648 | Signaling by FLT3 ITD and TKD mutants                       | -3.21 | -1.66 | 4/16   |
| Reactome Gene Sets | R-HSA-199418  | Negative regulation of the PI3K/AKT network                 | -3.16 | -1.62 | 10/113 |
| Reactome Gene Sets | R-HSA-5676590 | NIK-->noncanonical NF-kB signaling                          | -3.11 | -1.58 | 7/59   |
| Reactome Gene Sets | R-HSA-186763  | Downstream signal transduction                              | -3.10 | -1.57 | 5/29   |
| Reactome Gene Sets | R-HSA-187577  | SCF(Skp2)-mediated degradation of p27/p21                   | -3.07 | -1.54 | 7/60   |
| Reactome Gene Sets | R-HSA-5607761 | Dectin-1 mediated noncanonical NF-kB signaling              | -3.07 | -1.54 | 7/60   |
| Reactome Gene Sets | R-HSA-111469  | SMAC, XIAP-regulated apoptotic response                     | -3.06 | -1.54 | 3/8    |
| Reactome Gene Sets | R-HSA-5619084 | ABC transporter disorders                                   | -3.05 | -1.53 | 8/78   |
| Reactome Gene Sets | R-HSA-202424  | Downstream TCR signaling                                    | -3.01 | -1.50 | 9/98   |
| Reactome Gene Sets | R-HSA-9759194 | Nuclear events mediated by NFE2L2                           | -3.01 | -1.50 | 8/79   |
| Reactome Gene Sets | R-HSA-2172127 | DAP12 interactions                                          | -3.01 | -1.50 | 6/45   |
| Reactome Gene Sets | R-HSA-983168  | Antigen processing: Ubiquitination & Proteasome degradation | -2.92 | -1.43 | 18/309 |
| Reactome Gene Sets | R-HSA-2871837 | FCERI mediated NF-kB activation                             | -2.91 | -1.42 | 8/82   |
| Reactome Gene Sets | R-HSA-9013694 | Signaling by NOTCH4                                         | -2.91 | -1.42 | 8/82   |
| Reactome Gene Sets | R-HSA-9703465 | Signaling by FLT3 fusion proteins                           | -2.91 | -1.42 | 4/19   |
| Reactome Gene Sets | R-HSA-4608870 | Asymmetric localization of PCP proteins                     | -2.90 | -1.42 | 7/64   |
| Reactome Gene Sets | R-HSA-8985947 | Interleukin-9 signaling                                     | -2.90 | -1.42 | 3/9    |
| Reactome Gene Sets | R-HSA-9020933 | Interleukin-23 signaling                                    | -2.90 | -1.42 | 3/9    |
| Reactome Gene Sets | R-HSA-9755511 | KEAP1-NFE2L2 pathway                                        | -2.89 | -1.41 | 9/102  |

|                    |               |                                                        |       |       |       |
|--------------------|---------------|--------------------------------------------------------|-------|-------|-------|
| Reactome Gene Sets | R-HSA-195253  | Degradation of beta-catenin by the destruction complex | -2.87 | -1.40 | 8/83  |
| Reactome Gene Sets | R-HSA-69202   | Cyclin E associated events during G1/S transition      | -2.87 | -1.40 | 8/83  |
| Reactome Gene Sets | R-HSA-69563   | p53-Dependent G1 DNA Damage Response                   | -2.82 | -1.36 | 7/66  |
| Reactome Gene Sets | R-HSA-69580   | p53-Dependent G1/S DNA damage checkpoint               | -2.82 | -1.36 | 7/66  |
| Reactome Gene Sets | R-HSA-1236975 | Antigen processing-Cross presentation                  | -2.80 | -1.34 | 9/105 |
| Reactome Gene Sets | R-HSA-1169091 | Activation of NF-kappaB in B cells                     | -2.78 | -1.32 | 7/67  |
| Reactome Gene Sets | R-HSA-9702518 | STAT5 activation downstream of FLT3 ITD mutants        | -2.75 | -1.30 | 3/10  |

---

**Supplementary Table 5b. Significantly enriched pathways (Reactome) of DE coding genes by agonist mix treatment in Trisomy 12 CLL cases.**

| Category           | Term          | Description                                                                            | LogP  | Log(q-value) | InTerm_InList |
|--------------------|---------------|----------------------------------------------------------------------------------------|-------|--------------|---------------|
| Reactome Gene Sets | R-HSA-1280215 | Cytokine Signaling in Immune system                                                    | 13.20 | -9.15        | 63/715        |
| Reactome Gene Sets | R-HSA-1280218 | Adaptive Immune System                                                                 | -9.50 | -6.43        | 58/769        |
| Reactome Gene Sets | R-HSA-449147  | Signaling by Interleukins                                                              | -8.88 | -5.98        | 41/462        |
| Reactome Gene Sets | R-HSA-556833  | Metabolism of lipids                                                                   | -8.74 | -5.89        | 55/743        |
| Reactome Gene Sets | R-HSA-5663202 | Diseases of signal transduction by growth factor receptors and second messengers       | -8.14 | -5.36        | 38/433        |
| Reactome Gene Sets | R-HSA-5663202 | Diseases of signal transduction by growth factor receptors and second messengers       | -8.14 | -5.36        | 38/433        |
| Reactome Gene Sets | R-HSA-512988  | Interleukin-3, Interleukin-5 and GM-CSF signaling                                      | -7.81 | -5.10        | 12/48         |
| Reactome Gene Sets | R-HSA-5213460 | RIPK1-mediated regulated necrosis                                                      | -6.89 | -4.40        | 9/29          |
| Reactome Gene Sets | R-HSA-5675482 | Regulation of necroptotic cell death                                                   | -6.89 | -4.40        | 9/29          |
| Reactome Gene Sets | R-HSA-451927  | Interleukin-2 family signaling                                                         | -6.19 | -3.83        | 10/44         |
| Reactome Gene Sets | R-HSA-186763  | Downstream signal transduction                                                         | -5.75 | -3.50        | 8/29          |
| Reactome Gene Sets | R-HSA-9020958 | Interleukin-21 signaling                                                               | -5.23 | -3.11        | 5/10          |
| Reactome Gene Sets | R-HSA-9705462 | Inactivation of CSF3 (G-CSF) signaling                                                 | -5.14 | -3.05        | 7/25          |
| Reactome Gene Sets | R-HSA-5357905 | Regulation of TNFR1 signaling                                                          | -5.08 | -3.00        | 8/35          |
| Reactome Gene Sets | R-HSA-9669938 | Signaling by KIT in disease                                                            | -4.67 | -2.69        | 6/20          |
| Reactome Gene Sets | R-HSA-9670439 | Signaling by phosphorylated juxtamembrane, extracellular and kinase domain KIT mutants | -4.67 | -2.69        | 6/20          |
| Reactome Gene Sets | R-HSA-9674555 | Signaling by CSF3 (G-CSF)                                                              | -4.57 | -2.61        | 7/30          |
| Reactome Gene Sets | R-HSA-983705  | Signaling by the B Cell Receptor (BCR)                                                 | -4.41 | -2.48        | 13/112        |
| Reactome Gene Sets | R-HSA-1433557 | Signaling by SCF-KIT                                                                   | -4.39 | -2.46        | 8/43          |
| Reactome Gene Sets | R-HSA-75893   | TNF signaling                                                                          | -4.31 | -2.41        | 8/44          |
| Reactome Gene Sets | R-HSA-5218859 | Regulated Necrosis                                                                     | -4.27 | -2.39        | 9/57          |
| Reactome Gene Sets | R-HSA-186797  | Signaling by PDGF                                                                      | -4.21 | -2.33        | 9/58          |
| Reactome Gene Sets | R-HSA-8854691 | Interleukin-20 family signaling                                                        | -4.07 | -2.23        | 6/25          |
| Reactome Gene Sets | R-HSA-8985947 | Interleukin-9 signaling                                                                | -4.02 | -2.19        | 4/9           |

|                    |               |                                                                                |       |       |        |
|--------------------|---------------|--------------------------------------------------------------------------------|-------|-------|--------|
| Reactome Gene Sets | R-HSA-5655302 | Signaling by FGFR1 in disease                                                  | -3.87 | -2.08 | 7/38   |
| Reactome Gene Sets | R-HSA-9607240 | FLT3 Signaling                                                                 | -3.87 | -2.08 | 7/38   |
| Reactome Gene Sets | R-HSA-912526  | Interleukin receptor SHC signaling                                             | -3.87 | -2.07 | 6/27   |
| Reactome Gene Sets | R-HSA-5676594 | TNF receptor superfamily (TNFSF) members mediating non-canonical NF-kB pathway | -3.79 | -2.01 | 5/18   |
| Reactome Gene Sets | R-HSA-1839117 | Signaling by cytosolic FGFR1 fusion mutants                                    | -3.79 | -2.01 | 5/18   |
| Reactome Gene Sets | R-HSA-3371378 | Regulation by c-FLIP                                                           | -3.62 | -1.89 | 4/11   |
| Reactome Gene Sets | R-HSA-5218900 | CASP8 activity is inhibited                                                    | -3.62 | -1.89 | 4/11   |
| Reactome Gene Sets | R-HSA-69416   | Dimerization of procaspase-8                                                   | -3.62 | -1.89 | 4/11   |
| Reactome Gene Sets | R-HSA-2454202 | Fc epsilon receptor (FCERI) signaling                                          | -3.61 | -1.89 | 13/134 |
| Reactome Gene Sets | R-HSA-9700206 | Signaling by ALK in cancer                                                     | -3.60 | -1.88 | 8/55   |
| Reactome Gene Sets | R-HSA-9725370 | Signaling by ALK fusions and activated point mutants                           | -3.60 | -1.88 | 8/55   |
| Reactome Gene Sets | R-HSA-5668541 | TNFR2 non-canonical NF-kB pathway                                              | -3.54 | -1.85 | 11/102 |
| Reactome Gene Sets | R-HSA-1839124 | FGFR1 mutant receptor activation                                               | -3.52 | -1.83 | 6/31   |
| Reactome Gene Sets | R-HSA-9020558 | Interleukin-2 signaling                                                        | -3.45 | -1.79 | 4/12   |
| Reactome Gene Sets | R-HSA-8983432 | Interleukin-15 signaling                                                       | -3.17 | -1.60 | 4/14   |
| Reactome Gene Sets | R-HSA-6806834 | Signaling by MET                                                               | -3.17 | -1.60 | 9/79   |
| Reactome Gene Sets | R-HSA-982772  | Growth hormone receptor signaling                                              | -3.16 | -1.60 | 5/24   |
| Reactome Gene Sets | R-HSA-1266695 | Interleukin-7 signaling                                                        | -3.15 | -1.59 | 6/36   |
| Reactome Gene Sets | R-HSA-166520  | Signaling by NTRKs                                                             | -3.07 | -1.52 | 12/134 |
| Reactome Gene Sets | R-HSA-9027283 | Erythropoietin activates STAT5                                                 | -3.04 | -1.51 | 3/7    |
| Reactome Gene Sets | R-HSA-9703648 | Signaling by FLT3 ITD and TKD mutants                                          | -2.93 | -1.42 | 4/16   |
| Reactome Gene Sets | R-HSA-2132295 | MHC class II antigen presentation                                              | -2.85 | -1.36 | 11/123 |
| Reactome Gene Sets | R-HSA-140534  | Caspase activation via Death Receptors in the presence of ligand               | -2.83 | -1.35 | 4/17   |

**Supplementary Table 5c. Significantly enriched pathways (Reactome) of DE coding genes by agonist mix treatment in WT (Barcelona) CLL cases.**

| Category           | Term          | Description                                                    | LogP   | Log(q-value) | InTerm_InList |
|--------------------|---------------|----------------------------------------------------------------|--------|--------------|---------------|
| Reactome Gene Sets | R-HSA-8953897 | Cellular responses to stimuli                                  | -52.02 | -47.67       | 181/798       |
| Reactome Gene Sets | R-HSA-2262752 | Cellular responses to stress                                   | -51.20 | -47.15       | 178/784       |
| Reactome Gene Sets | R-HSA-72766   | Translation                                                    | -43.09 | -39.44       | 97/291        |
| Reactome Gene Sets | R-HSA-71291   | Metabolism of amino acids and derivatives                      | -41.26 | -37.81       | 108/374       |
| Reactome Gene Sets | R-HSA-9711123 | Cellular response to chemical stress                           | -37.55 | -34.31       | 74/194        |
| Reactome Gene Sets | R-HSA-9675108 | Nervous system development                                     | -31.79 | -28.67       | 122/577       |
| Reactome Gene Sets | R-HSA-422475  | Axon guidance                                                  | -31.22 | -28.13       | 118/552       |
| Reactome Gene Sets | R-HSA-9010553 | Regulation of expression of SLITs and ROBOs                    | -31.02 | -27.95       | 63/171        |
| Reactome Gene Sets | R-HSA-376176  | Signaling by ROBO receptors                                    | -30.92 | -27.88       | 71/218        |
| Reactome Gene Sets | R-HSA-8852276 | The role of GTSE1 in G2/M progression after G2 checkpoint      | -29.36 | -26.34       | 42/77         |
| Reactome Gene Sets | R-HSA-1280218 | Adaptive Immune System                                         | -28.69 | -25.69       | 139/769       |
| Reactome Gene Sets | R-HSA-1280215 | Cytokine Signaling in Immune system                            | -28.17 | -25.19       | 132/715       |
| Reactome Gene Sets | R-HSA-449147  | Signaling by Interleukins                                      | -26.95 | -24.00       | 100/462       |
| Reactome Gene Sets | R-HSA-611105  | Respiratory electron transport                                 | -26.06 | -23.14       | 45/103        |
| Reactome Gene Sets | R-HSA-5658442 | Regulation of RAS by GAPs                                      | -25.89 | -23.00       | 37/68         |
| Reactome Gene Sets | R-HSA-162906  | HIV Infection                                                  | -25.88 | -23.00       | 67/231        |
| Reactome Gene Sets | R-HSA-8953854 | Metabolism of RNA                                              | -25.79 | -22.93       | 123/674       |
| Reactome Gene Sets | R-HSA-1168372 | Downstream signaling events of B Cell Receptor (BCR)           | -25.27 | -22.42       | 40/83         |
| Reactome Gene Sets | R-HSA-9020702 | Interleukin-1 signaling                                        | -25.00 | -22.18       | 44/103        |
| Reactome Gene Sets | R-HSA-349425  | Autodegradation of the E3 ubiquitin ligase COP1                | -24.81 | -22.01       | 32/52         |
| Reactome Gene Sets | R-HSA-1428517 | The citric acid (TCA) cycle and respiratory electron transport | -24.52 | -21.74       | 57/178        |
| Reactome Gene Sets | R-HSA-3700989 | Transcriptional Regulation by TP53                             | -24.21 | -21.45       | 83/362        |
| Reactome Gene Sets | R-HSA-9755511 | KEAP1-NFE2L2 pathway                                           | -24.16 | -21.42       | 43/102        |
| Reactome Gene Sets | R-HSA-2454202 | Fc epsilon receptor (FCERI) signaling                          | -24.10 | -21.36       | 49/134        |
| Reactome Gene Sets | R-HSA-9604323 | Negative regulation of NOTCH4 signaling                        | -24.08 | -21.35       | 32/54         |
| Reactome Gene Sets | R-HSA-9759194 | Nuclear events mediated by NFE2L2                              | -24.00 | -21.28       | 38/79         |
| Reactome Gene Sets | R-HSA-5676590 | NIK-->noncanonical NF-kB signaling                             | -23.68 | -20.99       | 33/59         |

|                    |               |                                                                                                                     |        |        |         |
|--------------------|---------------|---------------------------------------------------------------------------------------------------------------------|--------|--------|---------|
| Reactome Gene Sets | R-HSA-9762114 | GSK3B and BTRC:CUL1-mediated-degradation of NFE2L2                                                                  | -23.46 | -20.77 | 31/52   |
| Reactome Gene Sets | R-HSA-5607761 | Dectin-1 mediated noncanonical NF-kB signaling                                                                      | -23.36 | -20.69 | 33/60   |
| Reactome Gene Sets | R-HSA-983705  | Signaling by the B Cell Receptor (BCR)                                                                              | -23.20 | -20.53 | 44/112  |
| Reactome Gene Sets | R-HSA-169911  | Regulation of Apoptosis                                                                                             | -23.10 | -20.44 | 31/53   |
| Reactome Gene Sets | R-HSA-4641258 | Degradation of DVL                                                                                                  | -23.05 | -20.41 | 32/57   |
| Reactome Gene Sets | R-HSA-69541   | Stabilization of p53                                                                                                | -23.05 | -20.41 | 32/57   |
| Reactome Gene Sets | R-HSA-69275   | G2/M Transition                                                                                                     | -22.98 | -20.35 | 58/196  |
| Reactome Gene Sets | R-HSA-162909  | Host Interactions of HIV factors                                                                                    | -22.90 | -20.27 | 47/130  |
| Reactome Gene Sets | R-HSA-211733  | Regulation of activated PAK-2p34 by proteasome mediated degradation                                                 | -22.84 | -20.22 | 30/50   |
| Reactome Gene Sets | R-HSA-69563   | p53-Dependent G1 DNA Damage Response                                                                                | -22.80 | -20.20 | 34/66   |
| Reactome Gene Sets | R-HSA-69580   | p53-Dependent G1/S DNA damage checkpoint                                                                            | -22.80 | -20.20 | 34/66   |
| Reactome Gene Sets | R-HSA-180585  | Vif-mediated degradation of APOBEC3G                                                                                | -22.76 | -20.18 | 31/54   |
| Reactome Gene Sets | R-HSA-8854050 | FBXL7 down-regulates AURKA during mitotic entry and in early mitosis                                                | -22.76 | -20.18 | 31/54   |
| Reactome Gene Sets | R-HSA-453274  | Mitotic G2-G2/M phases                                                                                              | -22.73 | -20.16 | 58/198  |
| Reactome Gene Sets | R-HSA-1236975 | Antigen processing-Cross presentation                                                                               | -22.54 | -19.97 | 42/105  |
| Reactome Gene Sets | R-HSA-1236974 | ER-Phagosome pathway                                                                                                | -22.51 | -19.96 | 39/90   |
| Reactome Gene Sets | R-HSA-350562  | Regulation of ornithine decarboxylase (ODC)                                                                         | -22.48 | -19.93 | 30/51   |
| Reactome Gene Sets | R-HSA-163200  | Respiratory electron transport, ATP synthesis by chemiosmotic coupling, and heat production by uncoupling proteins. | -22.46 | -19.92 | 46/127  |
| Reactome Gene Sets | R-HSA-4641257 | Degradation of AXIN                                                                                                 | -22.43 | -19.89 | 31/55   |
| Reactome Gene Sets | R-HSA-351202  | Metabolism of polyamines                                                                                            | -22.42 | -19.89 | 32/59   |
| Reactome Gene Sets | R-HSA-5607764 | CLEC7A (Dectin-1) signaling                                                                                         | -22.31 | -19.79 | 41/101  |
| Reactome Gene Sets | R-HSA-69615   | G1/S DNA Damage Checkpoints                                                                                         | -22.25 | -19.74 | 34/68   |
| Reactome Gene Sets | R-HSA-174084  | Autodegradation of Cdh1 by Cdh1:APC/C                                                                               | -22.17 | -19.67 | 33/64   |
| Reactome Gene Sets | R-HSA-1640170 | Cell Cycle                                                                                                          | -22.16 | -19.67 | 118/692 |
| Reactome Gene Sets | R-HSA-180534  | Vpu mediated degradation of CD4                                                                                     | -22.13 | -19.67 | 30/52   |
| Reactome Gene Sets | R-HSA-69601   | Ubiquitin Mediated Degradation of Phosphorylated Cdc25A                                                             | -22.13 | -19.67 | 30/52   |
| Reactome Gene Sets | R-HSA-69610   | p53-Independent DNA Damage Response                                                                                 | -22.13 | -19.67 | 30/52   |
| Reactome Gene Sets | R-HSA-69613   | p53-Independent G1/S DNA damage checkpoint                                                                          | -22.13 | -19.67 | 30/52   |
| Reactome Gene Sets | R-HSA-75815   | Ubiquitin-dependent degradation of Cyclin D                                                                         | -22.13 | -19.67 | 30/52   |

|                    |               |                                                                          |        |        |         |
|--------------------|---------------|--------------------------------------------------------------------------|--------|--------|---------|
| Reactome Gene Sets | R-HSA-5610780 | Degradation of GLI1 by the proteasome                                    | -22.12 | -19.67 | 32/60   |
| Reactome Gene Sets | R-HSA-5610783 | Degradation of GLI2 by the proteasome                                    | -22.12 | -19.67 | 32/60   |
| Reactome Gene Sets | R-HSA-5610785 | GLI3 is processed to GLI3R by the proteasome                             | -22.12 | -19.67 | 32/60   |
| Reactome Gene Sets | R-HSA-5668541 | TNFR2 non-canonical NF-kB pathway                                        | -22.11 | -19.67 | 41/102  |
| Reactome Gene Sets | R-HSA-5362768 | Hh mutants are degraded by ERAD                                          | -22.10 | -19.67 | 31/56   |
| Reactome Gene Sets | R-HSA-446652  | Interleukin-1 family signaling                                           | -22.06 | -19.64 | 48/141  |
| Reactome Gene Sets | R-HSA-5619084 | ABC transporter disorders                                                | -21.99 | -19.58 | 36/78   |
| Reactome Gene Sets | R-HSA-382556  | ABC-family proteins mediated transport                                   | -21.92 | -19.51 | 41/103  |
| Reactome Gene Sets | R-HSA-1236978 | Cross-presentation of soluble exogenous antigens (endosomes)             | -21.86 | -19.45 | 29/49   |
| Reactome Gene Sets | R-HSA-69239   | Synthesis of DNA                                                         | -21.60 | -19.20 | 44/121  |
| Reactome Gene Sets | R-HSA-1169091 | Activation of NF-kappaB in B cells                                       | -21.35 | -18.97 | 33/67   |
| Reactome Gene Sets | R-HSA-6798695 | Neutrophil degranulation                                                 | -21.33 | -18.95 | 93/482  |
| Reactome Gene Sets | R-HSA-3858494 | Beta-catenin independent WNT signaling                                   | -21.31 | -18.94 | 48/146  |
| Reactome Gene Sets | R-HSA-9633012 | Response of EIF2AK4 (GCN2) to amino acid deficiency                      | -21.31 | -18.94 | 40/101  |
| Reactome Gene Sets | R-HSA-5387390 | Hh mutants abrogate ligand secretion                                     | -21.19 | -18.83 | 31/59   |
| Reactome Gene Sets | R-HSA-174113  | SCF-beta-TrCP mediated degradation of Emi1                               | -21.16 | -18.80 | 30/55   |
| Reactome Gene Sets | R-HSA-8941858 | Regulation of RUNX3 expression and activity                              | -21.16 | -18.80 | 30/55   |
| Reactome Gene Sets | R-HSA-174154  | APC/C:Cdc20 mediated degradation of Securin                              | -21.08 | -18.74 | 33/68   |
| Reactome Gene Sets | R-HSA-8939902 | Regulation of RUNX2 expression and activity                              | -20.97 | -18.64 | 34/73   |
| Reactome Gene Sets | R-HSA-187577  | SCF(Skp2)-mediated degradation of p27/p21                                | -20.90 | -18.58 | 31/60   |
| Reactome Gene Sets | R-HSA-450408  | AUF1 (hnRNP D0) binds and destabilizes mRNA                              | -20.85 | -18.53 | 30/56   |
| Reactome Gene Sets | R-HSA-69278   | Cell Cycle, Mitotic                                                      | -20.79 | -18.48 | 101/561 |
| Reactome Gene Sets | R-HSA-5358346 | Hedgehog ligand biogenesis                                               | -20.71 | -18.40 | 32/65   |
| Reactome Gene Sets | R-HSA-5678895 | Defective CFTR causes cystic fibrosis                                    | -20.62 | -18.31 | 31/61   |
| Reactome Gene Sets | R-HSA-1234176 | Oxygen-dependent proline hydroxylation of Hypoxia-inducible Factor Alpha | -20.45 | -18.15 | 32/66   |
| Reactome Gene Sets | R-HSA-68949   | Orc1 removal from chromatin                                              | -20.34 | -18.04 | 33/71   |
| Reactome Gene Sets | R-HSA-1799339 | SRP-dependent cotranslational protein targeting to membrane              | -20.30 | -18.01 | 41/112  |
| Reactome Gene Sets | R-HSA-176409  | APC/C:Cdc20 mediated degradation of mitotic proteins                     | -20.26 | -17.98 | 34/76   |
| Reactome Gene Sets | R-HSA-2408522 | Selenoamino acid metabolism                                              | -20.23 | -17.95 | 42/118  |

|                    |               |                                                                                                          |        |        |         |
|--------------------|---------------|----------------------------------------------------------------------------------------------------------|--------|--------|---------|
| Reactome Gene Sets | R-HSA-72613   | Eukaryotic Translation Initiation                                                                        | -20.07 | -17.80 | 42/119  |
| Reactome Gene Sets | R-HSA-72737   | Cap-dependent Translation Initiation                                                                     | -20.07 | -17.80 | 42/119  |
| Reactome Gene Sets | R-HSA-68882   | Mitotic Anaphase                                                                                         | -20.04 | -17.78 | 60/236  |
| Reactome Gene Sets | R-HSA-176814  | Activation of APC/C and APC/C:Cdc20 mediated degradation of mitotic proteins                             | -20.04 | -17.77 | 34/77   |
| Reactome Gene Sets | R-HSA-4086400 | PCP/CE pathway                                                                                           | -20.03 | -17.77 | 37/92   |
| Reactome Gene Sets | R-HSA-2871837 | FCERI mediated NF-kB activation                                                                          | -20.01 | -17.76 | 35/82   |
| Reactome Gene Sets | R-HSA-9013694 | Signaling by NOTCH4                                                                                      | -20.01 | -17.76 | 35/82   |
| Reactome Gene Sets | R-HSA-2555396 | Mitotic Metaphase and Anaphase                                                                           | -19.95 | -17.70 | 60/237  |
| Reactome Gene Sets | R-HSA-174184  | Cdc20:Phospho-APC/C mediated degradation of Cyclin A                                                     | -19.86 | -17.63 | 33/73   |
| Reactome Gene Sets | R-HSA-69017   | CDK-mediated phosphorylation and removal of Cdc6                                                         | -19.86 | -17.63 | 33/73   |
| Reactome Gene Sets | R-HSA-69242   | S Phase                                                                                                  | -19.85 | -17.61 | 49/163  |
| Reactome Gene Sets | R-HSA-5619115 | Disorders of transmembrane transporters                                                                  | -19.84 | -17.61 | 51/176  |
| Reactome Gene Sets | R-HSA-4608870 | Asymmetric localization of PCP proteins                                                                  | -19.82 | -17.59 | 31/64   |
| Reactome Gene Sets | R-HSA-69202   | Cyclin E associated events during G1/S transition                                                        | -19.80 | -17.58 | 35/83   |
| Reactome Gene Sets | R-HSA-8948751 | Regulation of PTEN stability and activity                                                                | -19.70 | -17.49 | 32/69   |
| Reactome Gene Sets | R-HSA-174178  | APC/C:Cdh1 mediated degradation of Cdc20 and other APC/C:Cdh1 targeted proteins in late mitosis/early G1 | -19.63 | -17.43 | 33/74   |
| Reactome Gene Sets | R-HSA-179419  | APC:Cdc20 mediated degradation of cell cycle proteins prior to satisfaction of the cell cycle checkpoint | -19.63 | -17.43 | 33/74   |
| Reactome Gene Sets | R-HSA-156827  | L13a-mediated translational silencing of Ceruloplasmin expression                                        | -19.53 | -17.33 | 40/111  |
| Reactome Gene Sets | R-HSA-5663202 | Diseases of signal transduction by growth factor receptors and second messengers                         | -19.47 | -17.28 | 84/433  |
| Reactome Gene Sets | R-HSA-1234174 | Cellular response to hypoxia                                                                             | -19.41 | -17.22 | 33/75   |
| Reactome Gene Sets | R-HSA-69656   | Cyclin A:Cdk2-associated events at S phase entry                                                         | -19.39 | -17.20 | 35/85   |
| Reactome Gene Sets | R-HSA-72706   | GTP hydrolysis and joining of the 60S ribosomal subunit                                                  | -19.37 | -17.18 | 40/112  |
| Reactome Gene Sets | R-HSA-382551  | Transport of small molecules                                                                             | -19.30 | -17.12 | 116/729 |
| Reactome Gene Sets | R-HSA-176408  | Regulation of APC/C activators between G1/S and early anaphase                                           | -19.18 | -17.00 | 34/81   |
| Reactome Gene Sets | R-HSA-9711097 | Cellular response to starvation                                                                          | -19.11 | -16.93 | 47/156  |
| Reactome Gene Sets | R-HSA-69052   | Switching of origins to a post-replicative state                                                         | -19.04 | -16.86 | 36/92   |
| Reactome Gene Sets | R-HSA-195253  | Degradation of beta-catenin by the destruction complex                                                   | -18.77 | -16.60 | 34/83   |
| Reactome Gene Sets | R-HSA-69481   | G2/M Checkpoints                                                                                         | -18.55 | -16.39 | 48/167  |

|                    |               |                                                                     |        |        |         |
|--------------------|---------------|---------------------------------------------------------------------|--------|--------|---------|
| Reactome Gene Sets | R-HSA-5621481 | C-type lectin receptors (CLRs)                                      | -18.46 | -16.30 | 44/142  |
| Reactome Gene Sets | R-HSA-453279  | Mitotic G1 phase and G1/S transition                                | -18.37 | -16.21 | 45/149  |
| Reactome Gene Sets | R-HSA-5357801 | Programmed Cell Death                                               | -18.35 | -16.19 | 54/210  |
| Reactome Gene Sets | R-HSA-8878159 | Transcriptional regulation by RUNX3                                 | -18.31 | -16.16 | 36/96   |
| Reactome Gene Sets | R-HSA-168255  | Influenza Infection                                                 | -18.30 | -16.15 | 46/156  |
| Reactome Gene Sets | R-HSA-69206   | G1/S Transition                                                     | -18.27 | -16.13 | 42/131  |
| Reactome Gene Sets | R-HSA-5673001 | RAF/MAP kinase cascade                                              | -18.08 | -15.94 | 63/280  |
| Reactome Gene Sets | R-HSA-174143  | APC/C-mediated degradation of cell cycle proteins                   | -17.81 | -15.67 | 34/88   |
| Reactome Gene Sets | R-HSA-453276  | Regulation of mitotic cell cycle                                    | -17.81 | -15.67 | 34/88   |
| Reactome Gene Sets | R-HSA-168273  | Influenza Viral RNA Transcription and Replication                   | -17.73 | -15.59 | 42/135  |
| Reactome Gene Sets | R-HSA-5687128 | MAPK6/MAPK4 signaling                                               | -17.63 | -15.50 | 34/89   |
| Reactome Gene Sets | R-HSA-5684996 | MAPK1/MAPK3 signaling                                               | -17.59 | -15.46 | 63/286  |
| Reactome Gene Sets | R-HSA-72689   | Formation of a pool of free 40S subunits                            | -17.47 | -15.34 | 36/101  |
| Reactome Gene Sets | R-HSA-5610787 | Hedgehog 'off' state                                                | -17.40 | -15.27 | 38/113  |
| Reactome Gene Sets | R-HSA-2467813 | Separation of Sister Chromatids                                     | -17.40 | -15.27 | 50/191  |
| Reactome Gene Sets | R-HSA-199991  | Membrane Trafficking                                                | -17.36 | -15.24 | 102/634 |
| Reactome Gene Sets | R-HSA-5689603 | UCH proteinases                                                     | -17.31 | -15.19 | 36/102  |
| Reactome Gene Sets | R-HSA-983169  | Class I MHC mediated antigen processing & presentation              | -17.25 | -15.14 | 74/381  |
| Reactome Gene Sets | R-HSA-109581  | Apoptosis                                                           | -17.08 | -14.97 | 48/180  |
| Reactome Gene Sets | R-HSA-5683057 | MAPK family signaling cascades                                      | -17.07 | -14.96 | 67/325  |
| Reactome Gene Sets | R-HSA-69620   | Cell Cycle Checkpoints                                              | -17.04 | -14.93 | 63/293  |
| Reactome Gene Sets | R-HSA-2408557 | Selenocysteine synthesis                                            | -16.93 | -14.83 | 34/93   |
| Reactome Gene Sets | R-HSA-5653656 | Vesicle-mediated transport                                          | -16.89 | -14.79 | 105/673 |
| Reactome Gene Sets | R-HSA-450531  | Regulation of mRNA stability by proteins that bind AU-rich elements | -16.85 | -14.75 | 33/88   |
| Reactome Gene Sets | R-HSA-156902  | Peptide chain elongation                                            | -16.67 | -14.58 | 33/89   |
| Reactome Gene Sets | R-HSA-192823  | Viral mRNA Translation                                              | -16.67 | -14.58 | 33/89   |
| Reactome Gene Sets | R-HSA-68886   | M Phase                                                             | -16.56 | -14.47 | 77/418  |
| Reactome Gene Sets | R-HSA-202403  | TCR signaling                                                       | -16.40 | -14.32 | 38/120  |
| Reactome Gene Sets | R-HSA-8878166 | Transcriptional regulation by RUNX2                                 | -16.26 | -14.19 | 38/121  |

|                    |               |                                                                              |        |        |         |
|--------------------|---------------|------------------------------------------------------------------------------|--------|--------|---------|
| Reactome Gene Sets | R-HSA-202424  | Downstream TCR signaling                                                     | -16.12 | -14.05 | 34/98   |
| Reactome Gene Sets | R-HSA-5688426 | Deubiquitination                                                             | -16.05 | -13.98 | 62/298  |
| Reactome Gene Sets | R-HSA-156842  | Eukaryotic Translation Elongation                                            | -16.00 | -13.94 | 33/93   |
| Reactome Gene Sets | R-HSA-72764   | Eukaryotic Translation Termination                                           | -16.00 | -13.94 | 33/93   |
| Reactome Gene Sets | R-HSA-9716542 | Signaling by Rho GTPases, Miro GTPases and RHOBTB3                           | -15.99 | -13.93 | 108/723 |
| Reactome Gene Sets | R-HSA-9679506 | SARS-CoV Infections                                                          | -15.69 | -13.64 | 69/362  |
| Reactome Gene Sets | R-HSA-975956  | Nonsense Mediated Decay (NMD) independent of the Exon Junction Complex (EJC) | -15.68 | -13.64 | 33/95   |
| Reactome Gene Sets | R-HSA-6807070 | <b>PTEN Regulation</b>                                                       | -15.48 | -13.44 | 40/140  |
| Reactome Gene Sets | R-HSA-5632684 | Hedgehog 'on' state                                                          | -15.47 | -13.43 | 31/85   |
| Reactome Gene Sets | R-HSA-194315  | Signaling by Rho GTPases                                                     | -15.38 | -13.35 | 105/707 |
| Reactome Gene Sets | R-HSA-8951664 | Neddylation                                                                  | -14.96 | -12.93 | 53/240  |
| Reactome Gene Sets | R-HSA-69306   | DNA Replication                                                              | -14.85 | -12.83 | 46/188  |
| Reactome Gene Sets | R-HSA-6799198 | Complex I biogenesis                                                         | -14.83 | -12.81 | 25/57   |
| Reactome Gene Sets | R-HSA-9006925 | Intracellular signaling by second messengers                                 | -14.68 | -12.67 | 61/309  |
| Reactome Gene Sets | R-HSA-5358351 | <b>Signaling by Hedgehog</b>                                                 | -14.46 | -12.46 | 40/149  |
| Reactome Gene Sets | R-HSA-5368286 | Mitochondrial translation initiation                                         | -14.22 | -12.23 | 30/87   |
| Reactome Gene Sets | R-HSA-1257604 | PIP3 activates AKT signaling                                                 | -14.12 | -12.13 | 55/267  |
| Reactome Gene Sets | R-HSA-69002   | DNA Replication Pre-Initiation                                               | -14.05 | -12.06 | 41/160  |
| Reactome Gene Sets | R-HSA-73894   | DNA Repair                                                                   | -14.04 | -12.05 | 63/336  |
| Reactome Gene Sets | R-HSA-5689880 | Ub-specific processing proteases                                             | -14.03 | -12.05 | 49/220  |
| Reactome Gene Sets | R-HSA-157118  | <b>Signaling by NOTCH</b>                                                    | -14.02 | -12.03 | 51/236  |
| Reactome Gene Sets | R-HSA-8878171 | Transcriptional regulation by RUNX1                                          | -13.78 | -11.80 | 51/239  |
| Reactome Gene Sets | R-HSA-983168  | Antigen processing: Ubiquitination & Proteasome degradation                  | -13.55 | -11.57 | 59/309  |
| Reactome Gene Sets | R-HSA-9694516 | SARS-CoV-2 Infection                                                         | -13.44 | -11.47 | 56/285  |
| Reactome Gene Sets | R-HSA-5368287 | Mitochondrial translation                                                    | -13.34 | -11.36 | 30/93   |
| Reactome Gene Sets | R-HSA-5389840 | Mitochondrial translation elongation                                         | -13.33 | -11.36 | 29/87   |
| Reactome Gene Sets | R-HSA-5419276 | Mitochondrial translation termination                                        | -13.33 | -11.36 | 29/87   |
| Reactome Gene Sets | R-HSA-927802  | Nonsense-Mediated Decay (NMD)                                                | -12.96 | -11.00 | 33/115  |
| Reactome Gene Sets | R-HSA-975957  | Nonsense Mediated Decay (NMD) enhanced by the Exon Junction Complex (EJC)    | -12.96 | -11.00 | 33/115  |

|                    |               |                                                                                                                              |        |        |        |
|--------------------|---------------|------------------------------------------------------------------------------------------------------------------------------|--------|--------|--------|
| Reactome Gene Sets | R-HSA-68867   | Assembly of the pre-replicative complex                                                                                      | -12.89 | -10.94 | 37/143 |
| Reactome Gene Sets | R-HSA-9012999 | RHO GTPase cycle                                                                                                             | -12.36 | -10.42 | 72/449 |
| Reactome Gene Sets | R-HSA-195721  | Signaling by WNT                                                                                                             | -12.15 | -10.21 | 59/332 |
| Reactome Gene Sets | R-HSA-8939236 | RUNX1 regulates transcription of genes involved in differentiation of HSCs                                                   | -12.05 | -10.12 | 34/130 |
| Reactome Gene Sets | R-HSA-5696399 | Global Genome Nucleotide Excision Repair (GG-NER)                                                                            | -12.03 | -10.10 | 27/84  |
| Reactome Gene Sets | R-HSA-5696398 | Nucleotide Excision Repair                                                                                                   | -11.87 | -9.95  | 31/111 |
| Reactome Gene Sets | R-HSA-556833  | Metabolism of lipids                                                                                                         | -11.22 | -9.32  | 98/743 |
| Reactome Gene Sets | R-HSA-9705683 | SARS-CoV-2-host interactions                                                                                                 | -11.09 | -9.20  | 42/202 |
| Reactome Gene Sets | R-HSA-5696395 | Formation of Incision Complex in GG-NER                                                                                      | -10.44 | -8.57  | 18/43  |
| Reactome Gene Sets | R-HSA-446203  | Asparagine N-linked glycosylation<br>Activation of the mRNA upon binding of the cap-binding complex and eIFs, and subsequent | -10.15 | -8.30  | 52/304 |
| Reactome Gene Sets | R-HSA-72662   | binding to 43S                                                                                                               | -9.56  | -7.73  | 20/59  |
| Reactome Gene Sets | R-HSA-72312   | rRNA processing                                                                                                              | -9.21  | -7.40  | 39/204 |
| Reactome Gene Sets | R-HSA-72695   | Formation of the ternary complex, and subsequently, the 43S complex                                                          | -8.99  | -7.19  | 18/51  |
| Reactome Gene Sets | R-HSA-72649   | Translation initiation complex formation                                                                                     | -8.82  | -7.04  | 19/58  |
| Reactome Gene Sets | R-HSA-72702   | Ribosomal scanning and start codon recognition                                                                               | -8.82  | -7.04  | 19/58  |
| Reactome Gene Sets | R-HSA-8868773 | rRNA processing in the nucleus and cytosol                                                                                   | -8.75  | -6.97  | 37/194 |
| Reactome Gene Sets | R-HSA-6804756 | Regulation of TP53 Activity through Phosphorylation                                                                          | -8.69  | -6.91  | 24/92  |
| Reactome Gene Sets | R-HSA-6781827 | Transcription-Coupled Nucleotide Excision Repair (TC-NER)                                                                    | -8.60  | -6.83  | 22/79  |
| Reactome Gene Sets | R-HSA-6782135 | Dual incision in TC-NER                                                                                                      | -8.58  | -6.81  | 20/66  |
| Reactome Gene Sets | R-HSA-8856688 | Golgi-to-ER retrograde transport                                                                                             | -8.37  | -6.62  | 29/133 |
| Reactome Gene Sets | R-HSA-6791226 | Major pathway of rRNA processing in the nucleolus and cytosol                                                                | -8.28  | -6.53  | 35/184 |
| Reactome Gene Sets | R-HSA-201681  | TCF dependent signaling in response to WNT                                                                                   | -8.02  | -6.29  | 40/233 |
| Reactome Gene Sets | R-HSA-6811434 | COPI-dependent Golgi-to-ER retrograde traffic                                                                                | -8.00  | -6.27  | 24/99  |
| Reactome Gene Sets | R-HSA-6782210 | Gap-filling DNA repair synthesis and ligation in TC-NER                                                                      | -7.90  | -6.17  | 19/65  |
| Reactome Gene Sets | R-HSA-5696400 | Dual Incision in GG-NER                                                                                                      | -7.84  | -6.12  | 15/41  |
| Reactome Gene Sets | R-HSA-5633007 | Regulation of TP53 Activity                                                                                                  | -7.61  | -5.90  | 31/160 |
| Reactome Gene Sets | R-HSA-199977  | ER to Golgi Anterograde Transport                                                                                            | -7.44  | -5.75  | 30/154 |
| Reactome Gene Sets | R-HSA-9754678 | SARS-CoV-2 modulates host translation machinery                                                                              | -7.37  | -5.68  | 16/50  |
| Reactome Gene Sets | R-HSA-6811442 | Intra-Golgi and retrograde Golgi-to-ER traffic                                                                               | -6.71  | -5.08  | 34/202 |

|                    |               |                                                                     |       |       |        |
|--------------------|---------------|---------------------------------------------------------------------|-------|-------|--------|
| Reactome Gene Sets | R-HSA-6807878 | COPI-mediated anterograde transport                                 | -6.51 | -4.89 | 22/101 |
| Reactome Gene Sets | R-HSA-948021  | Transport to the Golgi and subsequent modification                  | -6.14 | -4.55 | 31/185 |
| Reactome Gene Sets | R-HSA-9705671 | SARS-CoV-2 activates/modulates innate and adaptive immune responses | -5.36 | -3.84 | 23/126 |
| Reactome Gene Sets | R-HSA-9013149 | RAC1 GTPase cycle                                                   | -4.32 | -2.92 | 27/185 |
| Reactome Gene Sets | R-HSA-9013423 | RAC3 GTPase cycle                                                   | -3.07 | -1.88 | 15/94  |
| Reactome Gene Sets | R-HSA-9013404 | RAC2 GTPase cycle                                                   | -2.89 | -1.75 | 14/88  |

---

**Supplementary Table 5d. Significantly enriched pathways (Reactome) of DE coding genes by agonist mix in WT (Aviano) CLL cases.**

| Category           | Term          | Description                                                                      | LogP   | Log(q-value) | InTerm_InList |
|--------------------|---------------|----------------------------------------------------------------------------------|--------|--------------|---------------|
| Reactome Gene Sets | R-HSA-1280215 | Cytokine Signaling in Immune system                                              | -23.39 | -19.05       | 108/715       |
| Reactome Gene Sets | R-HSA-1280218 | Adaptive Immune System                                                           | -18.88 | -15.01       | 104/769       |
| Reactome Gene Sets | R-HSA-449147  | Signaling by Interleukins                                                        | -18.17 | -14.43       | 75/462        |
| Reactome Gene Sets | R-HSA-5668541 | TNFR2 non-canonical NF-kB pathway                                                | -17.40 | -13.79       | 33/102        |
| Reactome Gene Sets | R-HSA-5663202 | Diseases of signal transduction by growth factor receptors and second messengers | -16.90 | -13.40       | 70/433        |
| Reactome Gene Sets | R-HSA-2454202 | Fc epsilon receptor (FCERI) signaling                                            | -15.99 | -12.72       | 36/134        |
| Reactome Gene Sets | R-HSA-6798695 | Neutrophil degranulation                                                         | -15.48 | -12.41       | 72/482        |
| Reactome Gene Sets | R-HSA-5357801 | Programmed Cell Death                                                            | -14.98 | -12.00       | 44/210        |
| Reactome Gene Sets | R-HSA-5607764 | CLEC7A (Dectin-1) signaling                                                      | -13.84 | -10.97       | 29/101        |
| Reactome Gene Sets | R-HSA-983705  | Signaling by the B Cell Receptor (BCR)                                           | -13.40 | -10.56       | 30/112        |
| Reactome Gene Sets | R-HSA-5621481 | C-type lectin receptors (CLRs)                                                   | -12.75 | -9.98        | 33/142        |
| Reactome Gene Sets | R-HSA-5688426 | Deubiquitination                                                                 | -12.31 | -9.63        | 49/298        |
| Reactome Gene Sets | R-HSA-69656   | Cyclin A:Cdk2-associated events at S phase entry                                 | -12.29 | -9.62        | 25/85         |
| Reactome Gene Sets | R-HSA-453279  | Mitotic G1 phase and G1/S transition                                             | -12.12 | -9.48        | 33/149        |
| Reactome Gene Sets | R-HSA-9716542 | Signaling by Rho GTPases, Miro GTPases and RHOBTB3                               | -12.03 | -9.42        | 85/723        |
| Reactome Gene Sets | R-HSA-9012999 | RHO GTPase cycle                                                                 | -11.87 | -9.28        | 62/449        |
| Reactome Gene Sets | R-HSA-109581  | Apoptosis                                                                        | -11.75 | -9.20        | 36/180        |
| Reactome Gene Sets | R-HSA-194315  | Signaling by Rho GTPases                                                         | -11.73 | -9.18        | 83/707        |
| Reactome Gene Sets | R-HSA-69202   | Cyclin E associated events during G1/S transition                                | -11.65 | -9.11        | 24/83         |
| Reactome Gene Sets | R-HSA-1168372 | Downstream signaling events of B Cell Receptor (BCR)                             | -11.65 | -9.11        | 24/83         |
| Reactome Gene Sets | R-HSA-9006925 | Intracellular signaling by second messengers                                     | -11.15 | -8.65        | 48/309        |
| Reactome Gene Sets | R-HSA-69242   | S Phase                                                                          | -10.98 | -8.49        | 33/163        |
| Reactome Gene Sets | R-HSA-446652  | Interleukin-1 family signaling                                                   | -10.62 | -8.14        | 30/141        |
| Reactome Gene Sets | R-HSA-983169  | Class I MHC mediated antigen processing & presentation                           | -10.36 | -7.94        | 53/381        |
| Reactome Gene Sets | R-HSA-9020702 | Interleukin-1 signaling                                                          | -10.27 | -7.86        | 25/103        |
| Reactome Gene Sets | R-HSA-2871837 | FCERI mediated NF-kB activation                                                  | -10.03 | -7.65        | 22/82         |
| Reactome Gene Sets | R-HSA-1257604 | PIP3 activates AKT signaling                                                     | -10.02 | -7.64        | 42/267        |

|                    |               |                                                                      |        |       |        |
|--------------------|---------------|----------------------------------------------------------------------|--------|-------|--------|
| Reactome Gene Sets | R-HSA-69206   | G1/S Transition                                                      | -10.01 | -7.64 | 28/131 |
| Reactome Gene Sets | R-HSA-9755511 | KEAP1-NFE2L2 pathway                                                 | -9.58  | -7.26 | 24/102 |
| Reactome Gene Sets | R-HSA-9711123 | Cellular response to chemical stress                                 | -9.51  | -7.20 | 34/194 |
| Reactome Gene Sets | R-HSA-202403  | TCR signaling                                                        | -9.48  | -7.18 | 26/120 |
| Reactome Gene Sets | R-HSA-5676590 | NIK-->noncanonical NF-kB signaling                                   | -9.33  | -7.05 | 18/59  |
| Reactome Gene Sets | R-HSA-1169091 | Activation of NF-kappaB in B cells                                   | -9.20  | -6.94 | 19/67  |
| Reactome Gene Sets | R-HSA-5607761 | Dectin-1 mediated noncanonical NF-kB signaling                       | -9.19  | -6.94 | 18/60  |
| Reactome Gene Sets | R-HSA-187577  | SCF(Skp2)-mediated degradation of p27/p21                            | -9.19  | -6.94 | 18/60  |
| Reactome Gene Sets | R-HSA-5689880 | Ub-specific processing proteases                                     | -9.17  | -6.92 | 36/220 |
| Reactome Gene Sets | R-HSA-174113  | SCF-beta-TrCP mediated degradation of Emi1                           | -8.94  | -6.71 | 17/55  |
| Reactome Gene Sets | R-HSA-1236978 | Cross-presentation of soluble exogenous antigens (endosomes)         | -8.85  | -6.63 | 16/49  |
| Reactome Gene Sets | R-HSA-2262752 | Cellular responses to stress                                         | -8.74  | -6.54 | 81/784 |
| Reactome Gene Sets | R-HSA-1236975 | Antigen processing-Cross presentation                                | -8.56  | -6.37 | 23/105 |
| Reactome Gene Sets | R-HSA-983168  | Antigen processing: Ubiquitination & Proteasome degradation          | -8.54  | -6.36 | 43/309 |
| Reactome Gene Sets | R-HSA-69563   | p53-Dependent G1 DNA Damage Response                                 | -8.45  | -6.30 | 18/66  |
| Reactome Gene Sets | R-HSA-69580   | p53-Dependent G1/S DNA damage checkpoint                             | -8.45  | -6.30 | 18/66  |
| Reactome Gene Sets | R-HSA-349425  | Autodegradation of the E3 ubiquitin ligase COP1                      | -8.42  | -6.28 | 16/52  |
| Reactome Gene Sets | R-HSA-9762114 | GSK3B and BTRC:CUL1-mediated-degradation of NFE2L2                   | -8.42  | -6.28 | 16/52  |
| Reactome Gene Sets | R-HSA-351202  | Metabolism of polyamines                                             | -8.42  | -6.28 | 17/59  |
| Reactome Gene Sets | R-HSA-8953897 | Cellular responses to stimuli                                        | -8.39  | -6.26 | 81/798 |
| Reactome Gene Sets | R-HSA-5610780 | Degradation of GLI1 by the proteasome                                | -8.30  | -6.18 | 17/60  |
| Reactome Gene Sets | R-HSA-195253  | Degradation of beta-catenin by the destruction complex               | -8.29  | -6.18 | 20/83  |
| Reactome Gene Sets | R-HSA-69615   | G1/S DNA Damage Checkpoints                                          | -8.23  | -6.13 | 18/68  |
| Reactome Gene Sets | R-HSA-8854050 | FBXL7 down-regulates AURKA during mitotic entry and in early mitosis | -8.16  | -6.07 | 16/54  |
| Reactome Gene Sets | R-HSA-9604323 | Negative regulation of NOTCH4 signaling                              | -8.16  | -6.07 | 16/54  |
| Reactome Gene Sets | R-HSA-4641257 | Degradation of AXIN                                                  | -8.03  | -5.96 | 16/55  |
| Reactome Gene Sets | R-HSA-5619084 | ABC transporter disorders                                            | -7.99  | -5.93 | 19/78  |
| Reactome Gene Sets | R-HSA-69239   | Synthesis of DNA                                                     | -7.99  | -5.93 | 24/121 |
| Reactome Gene Sets | R-HSA-5362768 | Hh mutants are degraded by ERAD                                      | -7.90  | -5.86 | 16/56  |

|                    |               |                                                                     |       |       |        |
|--------------------|---------------|---------------------------------------------------------------------|-------|-------|--------|
| Reactome Gene Sets | R-HSA-9759194 | Nuclear events mediated by NFE2L2                                   | -7.89 | -5.85 | 19/79  |
| Reactome Gene Sets | R-HSA-8878159 | Transcriptional regulation by RUNX3                                 | -7.86 | -5.83 | 21/96  |
| Reactome Gene Sets | R-HSA-450531  | Regulation of mRNA stability by proteins that bind AU-rich elements | -7.82 | -5.79 | 20/88  |
| Reactome Gene Sets | R-HSA-4641258 | Degradation of DVL                                                  | -7.78 | -5.76 | 16/57  |
| Reactome Gene Sets | R-HSA-69541   | Stabilization of p53                                                | -7.78 | -5.76 | 16/57  |
| Reactome Gene Sets | R-HSA-211733  | Regulation of activated PAK-2p34 by proteasome mediated degradation | -7.77 | -5.75 | 15/50  |
| Reactome Gene Sets | R-HSA-202424  | Downstream TCR signaling                                            | -7.70 | -5.69 | 21/98  |
| Reactome Gene Sets | R-HSA-350562  | Regulation of ornithine decarboxylase (ODC)                         | -7.64 | -5.65 | 15/51  |
| Reactome Gene Sets | R-HSA-5387390 | Hh mutants abrogate ligand secretion                                | -7.55 | -5.56 | 16/59  |
| Reactome Gene Sets | R-HSA-69278   | Cell Cycle, Mitotic                                                 | -7.53 | -5.54 | 61/561 |
| Reactome Gene Sets | R-HSA-69610   | p53-Independent DNA Damage Response                                 | -7.51 | -5.53 | 15/52  |
| Reactome Gene Sets | R-HSA-69613   | p53-Independent G1/S DNA damage checkpoint                          | -7.51 | -5.53 | 15/52  |
| Reactome Gene Sets | R-HSA-69601   | Ubiquitin Mediated Degradation of Phosphorylated Cdc25A             | -7.51 | -5.53 | 15/52  |
| Reactome Gene Sets | R-HSA-75815   | Ubiquitin-dependent degradation of Cyclin D                         | -7.51 | -5.53 | 15/52  |
| Reactome Gene Sets | R-HSA-180534  | Vpu mediated degradation of CD4                                     | -7.51 | -5.53 | 15/52  |
| Reactome Gene Sets | R-HSA-5610783 | Degradation of GLI2 by the proteasome                               | -7.43 | -5.47 | 16/60  |
| Reactome Gene Sets | R-HSA-5610785 | GLI3 is processed to GLI3R by the proteasome                        | -7.43 | -5.47 | 16/60  |
| Reactome Gene Sets | R-HSA-5683057 | MAPK family signaling cascades                                      | -7.41 | -5.45 | 42/325 |
| Reactome Gene Sets | R-HSA-5658442 | Regulation of RAS by GAPs                                           | -7.40 | -5.44 | 17/68  |
| Reactome Gene Sets | R-HSA-71291   | Metabolism of amino acids and derivatives                           | -7.39 | -5.43 | 46/374 |
| Reactome Gene Sets | R-HSA-169911  | Regulation of Apoptosis                                             | -7.39 | -5.43 | 15/53  |
| Reactome Gene Sets | R-HSA-5673001 | RAF/MAP kinase cascade                                              | -7.34 | -5.39 | 38/280 |
| Reactome Gene Sets | R-HSA-5678895 | Defective CFTR causes cystic fibrosis                               | -7.32 | -5.38 | 16/61  |
| Reactome Gene Sets | R-HSA-8948751 | Regulation of PTEN stability and activity                           | -7.30 | -5.36 | 17/69  |
| Reactome Gene Sets | R-HSA-1640170 | Cell Cycle                                                          | -7.28 | -5.35 | 70/692 |
| Reactome Gene Sets | R-HSA-180585  | Vif-mediated degradation of APOBEC3G                                | -7.27 | -5.34 | 15/54  |
| Reactome Gene Sets | R-HSA-8941858 | Regulation of RUNX3 expression and activity                         | -7.15 | -5.24 | 15/55  |
| Reactome Gene Sets | R-HSA-68949   | Orc1 removal from chromatin                                         | -7.10 | -5.20 | 17/71  |
| Reactome Gene Sets | R-HSA-5684996 | MAPK1/MAPK3 signaling                                               | -7.09 | -5.19 | 38/286 |

|                    |               |                                                                          |       |       |        |
|--------------------|---------------|--------------------------------------------------------------------------|-------|-------|--------|
| Reactome Gene Sets | R-HSA-450408  | AUF1 (hnRNP D0) binds and destabilizes mRNA                              | -7.04 | -5.15 | 15/56  |
| Reactome Gene Sets | R-HSA-4608870 | Asymmetric localization of PCP proteins                                  | -7.00 | -5.12 | 16/64  |
| Reactome Gene Sets | R-HSA-5687128 | MAPK6/MAPK4 signaling                                                    | -7.00 | -5.12 | 19/89  |
| Reactome Gene Sets | R-HSA-5358346 | Hedgehog ligand biogenesis                                               | -6.90 | -5.03 | 16/65  |
| Reactome Gene Sets | R-HSA-9013694 | Signaling by NOTCH4                                                      | -6.86 | -5.00 | 18/82  |
| Reactome Gene Sets | R-HSA-1234176 | Oxygen-dependent proline hydroxylation of Hypoxia-inducible Factor Alpha | -6.80 | -4.95 | 16/66  |
| Reactome Gene Sets | R-HSA-4086400 | PCP/CE pathway                                                           | -6.76 | -4.91 | 19/92  |
| Reactome Gene Sets | R-HSA-1234174 | Cellular response to hypoxia                                             | -6.73 | -4.89 | 17/75  |
| Reactome Gene Sets | R-HSA-162909  | Host Interactions of HIV factors                                         | -6.73 | -4.89 | 23/130 |
| Reactome Gene Sets | R-HSA-6807070 | PTEN Regulation                                                          | -6.73 | -4.89 | 24/140 |
| Reactome Gene Sets | R-HSA-5689603 | UCH proteinases                                                          | -6.69 | -4.86 | 20/102 |
| Reactome Gene Sets | R-HSA-8878171 | Transcriptional regulation by RUNX1                                      | -6.64 | -4.81 | 33/239 |
| Reactome Gene Sets | R-HSA-382556  | ABC-family proteins mediated transport                                   | -6.62 | -4.79 | 20/103 |
| Reactome Gene Sets | R-HSA-376176  | Signaling by ROBO receptors                                              | -6.56 | -4.74 | 31/218 |
| Reactome Gene Sets | R-HSA-9675108 | Nervous system development                                               | -6.39 | -4.59 | 59/577 |
| Reactome Gene Sets | R-HSA-3858494 | Beta-catenin independent WNT signaling                                   | -6.38 | -4.58 | 24/146 |
| Reactome Gene Sets | R-HSA-1236974 | ER-Phagosome pathway                                                     | -6.22 | -4.44 | 18/90  |
| Reactome Gene Sets | R-HSA-176408  | Regulation of APC/C activators between G1/S and early anaphase           | -6.22 | -4.44 | 17/81  |
| Reactome Gene Sets | R-HSA-174084  | Autodegradation of Cdh1 by Cdh1:APC/C                                    | -6.21 | -4.43 | 15/64  |
| Reactome Gene Sets | R-HSA-8939902 | Regulation of RUNX2 expression and activity                              | -6.16 | -4.39 | 16/73  |
| Reactome Gene Sets | R-HSA-8951664 | Neddylation                                                              | -6.11 | -4.35 | 32/240 |
| Reactome Gene Sets | R-HSA-5357905 | Regulation of TNFR1 signaling                                            | -6.08 | -4.32 | 11/35  |
| Reactome Gene Sets | R-HSA-9013149 | RAC1 GTPase cycle                                                        | -6.03 | -4.28 | 27/185 |
| Reactome Gene Sets | R-HSA-162906  | HIV Infection                                                            | -6.00 | -4.26 | 31/231 |
| Reactome Gene Sets | R-HSA-422475  | Axon guidance                                                            | -5.99 | -4.25 | 56/552 |
| Reactome Gene Sets | R-HSA-5619115 | Disorders of transmembrane transporters                                  | -5.93 | -4.19 | 26/176 |
| Reactome Gene Sets | R-HSA-5632684 | Hedgehog 'on' state                                                      | -5.91 | -4.18 | 17/85  |
| Reactome Gene Sets | R-HSA-174154  | APC/C:Cdc20 mediated degradation of Securin                              | -5.85 | -4.13 | 15/68  |
| Reactome Gene Sets | R-HSA-75893   | TNF signaling                                                            | -5.84 | -4.12 | 12/44  |

|                    |               |                                                                                                          |       |       |        |
|--------------------|---------------|----------------------------------------------------------------------------------------------------------|-------|-------|--------|
| Reactome Gene Sets | R-HSA-8852276 | The role of GTSE1 in G2/M progression after G2 checkpoint                                                | -5.83 | -4.11 | 16/77  |
| Reactome Gene Sets | R-HSA-157118  | Signaling by NOTCH                                                                                       | -5.80 | -4.09 | 31/236 |
| Reactome Gene Sets | R-HSA-174143  | APC/C-mediated degradation of cell cycle proteins                                                        | -5.69 | -3.99 | 17/88  |
| Reactome Gene Sets | R-HSA-453276  | Regulation of mitotic cell cycle                                                                         | -5.69 | -3.99 | 17/88  |
| Reactome Gene Sets | R-HSA-453274  | Mitotic G2-G2/M phases                                                                                   | -5.45 | -3.78 | 27/198 |
| Reactome Gene Sets | R-HSA-174184  | Cdc20:Phospho-APC/C mediated degradation of Cyclin A                                                     | -5.44 | -3.77 | 15/73  |
| Reactome Gene Sets | R-HSA-69017   | CDK-mediated phosphorylation and removal of Cdc6                                                         | -5.44 | -3.77 | 15/73  |
| Reactome Gene Sets | R-HSA-69052   | Switching of origins to a post-replicative state                                                         | -5.41 | -3.75 | 17/92  |
| Reactome Gene Sets | R-HSA-174178  | APC/C:Cdh1 mediated degradation of Cdc20 and other APC/C:Cdh1 targeted proteins in late mitosis/early G1 | -5.36 | -3.71 | 15/74  |
| Reactome Gene Sets | R-HSA-179419  | APC:Cdc20 mediated degradation of cell cycle proteins prior to satisfaction of the cell cycle checkpoint | -5.36 | -3.71 | 15/74  |
| Reactome Gene Sets | R-HSA-5610787 | Hedgehog 'off' state                                                                                     | -5.34 | -3.69 | 19/113 |
| Reactome Gene Sets | R-HSA-176409  | APC/C:Cdc20 mediated degradation of mitotic proteins                                                     | -5.21 | -3.59 | 15/76  |
| Reactome Gene Sets | R-HSA-176814  | Activation of APC/C and APC/C:Cdc20 mediated degradation of mitotic proteins                             | -5.14 | -3.52 | 15/77  |
| Reactome Gene Sets | R-HSA-9010553 | Regulation of expression of SLITs and ROBOs                                                              | -5.13 | -3.52 | 24/171 |
| Reactome Gene Sets | R-HSA-69275   | G2/M Transition                                                                                          | -5.05 | -3.45 | 26/196 |
| Reactome Gene Sets | R-HSA-8878166 | Transcriptional regulation by RUNX2                                                                      | -4.89 | -3.31 | 19/121 |
| Reactome Gene Sets | R-HSA-2555396 | Mitotic Metaphase and Anaphase                                                                           | -4.87 | -3.29 | 29/237 |
| Reactome Gene Sets | R-HSA-109606  | Intrinsic Pathway for Apoptosis                                                                          | -4.75 | -3.20 | 12/55  |
| Reactome Gene Sets | R-HSA-69620   | Cell Cycle Checkpoints                                                                                   | -4.69 | -3.14 | 33/293 |
| Reactome Gene Sets | R-HSA-5357786 | TNFR1-induced proapoptotic signaling                                                                     | -4.65 | -3.10 | 6/13   |
| Reactome Gene Sets | R-HSA-5358351 | Signaling by Hedgehog                                                                                    | -4.60 | -3.06 | 21/149 |
| Reactome Gene Sets | R-HSA-68882   | Mitotic Anaphase                                                                                         | -4.48 | -2.96 | 28/236 |
| Reactome Gene Sets | R-HSA-69306   | DNA Replication                                                                                          | -4.44 | -2.93 | 24/188 |
| Reactome Gene Sets | R-HSA-9013148 | CDC42 GTPase cycle                                                                                       | -4.34 | -2.85 | 21/155 |
| Reactome Gene Sets | R-HSA-69481   | G2/M Checkpoints                                                                                         | -4.33 | -2.84 | 22/167 |
| Reactome Gene Sets | R-HSA-2467813 | Separation of Sister Chromatids                                                                          | -4.32 | -2.83 | 24/191 |
| Reactome Gene Sets | R-HSA-195721  | Signaling by WNT                                                                                         | -4.33 | -2.83 | 35/332 |
| Reactome Gene Sets | R-HSA-2219528 | PI3K/AKT Signaling in Cancer                                                                             | -4.11 | -2.65 | 16/104 |

|                    |               |                                                                            |       |       |        |
|--------------------|---------------|----------------------------------------------------------------------------|-------|-------|--------|
| Reactome Gene Sets | R-HSA-5357956 | TNFR1-induced NFkappaB signaling pathway                                   | -4.00 | -2.56 | 8/30   |
| Reactome Gene Sets | R-HSA-8939236 | RUNX1 regulates transcription of genes involved in differentiation of HSCs | -3.93 | -2.50 | 18/130 |
| Reactome Gene Sets | R-HSA-9013423 | RAC3 GTPase cycle                                                          | -3.52 | -2.15 | 14/94  |
| Reactome Gene Sets | R-HSA-9013406 | RHOQ GTPase cycle                                                          | -3.11 | -1.81 | 10/59  |
| Reactome Gene Sets | R-HSA-69002   | DNA Replication Pre-Initiation                                             | -2.83 | -1.59 | 18/160 |
| Reactome Gene Sets | R-HSA-201681  | TCF dependent signaling in response to WNT                                 | -2.68 | -1.47 | 23/233 |
| Reactome Gene Sets | R-HSA-68867   | Assembly of the pre-replicative complex                                    | -2.56 | -1.38 | 16/143 |
| Reactome Gene Sets | R-HSA-111471  | Apoptotic factor-mediated response                                         | -2.54 | -1.37 | 5/20   |
| Reactome Gene Sets | R-HSA-168928  | DDX58/IFIH1-mediated induction of interferon-alpha/beta                    | -2.51 | -1.35 | 11/82  |
| Reactome Gene Sets | R-HSA-111461  | Cytochrome c-mediated apoptotic response                                   | -2.47 | -1.31 | 4/13   |
| Reactome Gene Sets | R-HSA-933543  | NF-kB activation through FADD/RIP-1 pathway mediated by caspase-8 and -10  | -2.47 | -1.31 | 4/13   |

---

**Supplementary Table 5e. List of enriched pathways among DE genes by agonist mix treatment and their overlapping in the four CLL studied cohorts.**

**6 common elements in "WT Aviano", "WT Barcelona", "TP53 altered" and "Trisomy 12":**

---

Cytokine Signaling in Immune system  
Adaptive Immune System  
Signaling by Interleukins  
Diseases of signal transduction by growth factor receptors and second messengers  
Fc epsilon receptor (FCER1) signaling  
Signaling by the B Cell Receptor (BCR)

---

**43 common elements in "WT Aviano", "WT Barcelona" and "TP53 altered":**

---

Programmed Cell Death  
CLEC7A (Dectin-1) signaling  
C-type lectin receptors (CLRs)  
Cyclin A:Cdk2-associated events at S phase entry  
Mitotic G1 phase and G1/S transition  
Apoptosis  
Cyclin E associated events during G1/S transition  
Downstream signaling events of B Cell Receptor (BCR)  
Intracellular signaling by second messengers  
S Phase  
Interleukin-1 family signaling  
Class I MHC mediated antigen processing & presentation  
Interleukin-1 signaling  
FCER1 mediated NF-kB activation  
PIP3 activates AKT signaling  
G1/S Transition  
KEAP1-NFE2L2 pathway  
TCR signaling

NIK-->noncanonical NF-kB signaling  
Activation of NF-kappaB in B cells  
Dectin-1 mediated noncanonical NF-kB signaling  
SCF(Skp2)-mediated degradation of p27/p21  
Antigen processing-Cross presentation  
Antigen processing: Ubiquitination & Proteasome degradation  
p53-Dependent G1 DNA Damage Response  
p53-Dependent G1/S DNA damage checkpoint  
Degradation of beta-catenin by the destruction complex  
Degradation of AXIN  
ABC transporter disorders  
Synthesis of DNA  
Nuclear events mediated by NFE2L2  
Transcriptional regulation by RUNX3  
Downstream TCR signaling  
MAPK family signaling cascades  
RAF/MAP kinase cascade  
MAPK1/MAPK3 signaling  
Asymmetric localization of PCP proteins  
Signaling by NOTCH4  
PCP/CE pathway  
Beta-catenin independent WNT signaling  
Cell Cycle Checkpoints  
G2/M Checkpoints  
Signaling by WNT

---

**91 common elements in "WT Aviano" and "WT Barcelona":**

---

Neutrophil degranulation  
Deubiquitination

Signaling by Rho GTPases, Miro GTPases and RHOBTB3  
RHO GTPase cycle  
Signaling by Rho GTPases  
Cellular response to chemical stress  
Ub-specific processing proteases  
SCF-beta-TrCP mediated degradation of Emi1  
Cross-presentation of soluble exogenous antigens (endosomes)  
Cellular responses to stress  
Autodegradation of the E3 ubiquitin ligase COP1  
GSK3B and BTRC:CUL1-mediated-degradation of NFE2L2  
Metabolism of polyamines  
Cellular responses to stimuli  
Degradation of GLI1 by the proteasome  
G1/S DNA Damage Checkpoints  
FBXL7 down-regulates AURKA during mitotic entry and in early mitosis  
Negative regulation of NOTCH4 signaling  
Hh mutants are degraded by ERAD  
Regulation of mRNA stability by proteins that bind AU-rich elements  
Degradation of DVL  
Stabilization of p53  
Regulation of activated PAK-2p34 by proteasome mediated degradation  
Regulation of ornithine decarboxylase (ODC)  
Hh mutants abrogate ligand secretion  
Cell Cycle, Mitotic  
p53-Independent DNA Damage Response  
p53-Independent G1/S DNA damage checkpoint  
Ubiquitin Mediated Degradation of Phosphorylated Cdc25A  
Ubiquitin-dependent degradation of Cyclin D  
Vpu mediated degradation of CD4

Degradation of GLI2 by the proteasome  
GLI3 is processed to GLI3R by the proteasome  
Regulation of RAS by GAPs  
Metabolism of amino acids and derivatives  
Regulation of Apoptosis  
Defective CFTR causes cystic fibrosis  
Regulation of PTEN stability and activity  
Cell Cycle  
Vif-mediated degradation of APOBEC3G  
Regulation of RUNX3 expression and activity  
Orc1 removal from chromatin  
AUF1 (hnRNP D0) binds and destabilizes mRNA  
MAPK6/MAPK4 signaling  
Hedgehog ligand biogenesis  
Oxygen-dependent proline hydroxylation of Hypoxia-inducible Factor Alpha  
Cellular response to hypoxia  
Host Interactions of HIV factors  
PTEN Regulation  
UCH proteinases  
Transcriptional regulation by RUNX1  
ABC-family proteins mediated transport  
Signaling by ROBO receptors  
Nervous system development  
ER-Phagosome pathway  
Regulation of APC/C activators between G1/S and early anaphase  
Autodegradation of Cdh1 by Cdh1:APC/C  
Regulation of RUNX2 expression and activity  
Neddylation  
RAC1 GTPase cycle

HIV Infection  
Axon guidance  
Disorders of transmembrane transporters  
Hedgehog 'on' state  
APC/C:Cdc20 mediated degradation of Securin  
The role of GTSE1 in G2/M progression after G2 checkpoint  
Signaling by NOTCH  
APC/C-mediated degradation of cell cycle proteins  
Regulation of mitotic cell cycle  
Mitotic G2-G2/M phases  
Cdc20:Phospho-APC/C mediated degradation of Cyclin A  
CDK-mediated phosphorylation and removal of Cdc6  
Switching of origins to a post-replicative state  
APC/C:Cdh1 mediated degradation of Cdc20 and other APC/C:Cdh1 targeted proteins in late mitosis/early G1  
APC:Cdc20 mediated degradation of cell cycle proteins prior to satisfaction of the cell cycle checkpoint  
Hedgehog 'off' state  
APC/C:Cdc20 mediated degradation of mitotic proteins  
Activation of APC/C and APC/C:Cdc20 mediated degradation of mitotic proteins  
Regulation of expression of SLITs and ROBOs  
G2/M Transition  
Transcriptional regulation by RUNX2  
Mitotic Metaphase and Anaphase  
Signaling by Hedgehog  
Mitotic Anaphase  
DNA Replication  
Separation of Sister Chromatids  
RUNX1 regulates transcription of genes involved in differentiation of HSCs  
RAC3 GTPase cycle

DNA Replication Pre-Initiation  
TCF dependent signaling in response to WNT  
Assembly of the pre-replicative complex

---

**18 common elements in "TP53 altered" and "Trisomy 12":**

---

Interleukin-2 family signaling  
Interleukin-3, Interleukin-5 and GM-CSF signaling  
Signaling by SCF-KIT  
Growth hormone receptor signaling  
FLT3 Signaling  
Interleukin-2 signaling  
Signaling by KIT in disease  
Signaling by phosphorylated juxtamembrane, extracellular and kinase domain KIT mutants  
Erythropoietin activates STAT5  
Interleukin-15 signaling  
Interleukin-20 family signaling  
Interleukin-21 signaling  
Signaling by CSF3 (G-CSF)  
Interleukin-7 signaling  
Inactivation of CSF3 (G-CSF) signaling  
Signaling by FLT3 ITD and TKD mutants  
Downstream signal transduction  
Interleukin-9 signaling

---

**2 common elements in "WT Barcelona" and "TP53 altered":**

---

Transcriptional Regulation by TP53  
Regulation of TP53 Activity

---

**2 common elements in "WT Aviano" and "TP53 altered":**

---

---

Intrinsic Pathway for Apoptosis  
PI3K/AKT Signaling in Cancer

---

**2 common elements in "WT Aviano" and "Trisomy 12":**

---

Regulation of TNFR1 signaling  
TNF signaling

---

**1 common element in "WT Aviano", "WT Barcelona" and "Trisomy 12":**

---

TNFR2 non-canonical NF-kB pathway

---

**1 common element in "WT Barcelona" and "Trisomy 12":**

---

Metabolism of lipids

---

**2 common elements in "WT Barcelona" and "TP53 altered":**

---

Transcriptional Regulation by TP53  
Regulation of TP53 Activity

---

**8 elements included exclusively in "WT Aviano":**

---

TNFR1-induced proapoptotic signaling  
CDC42 GTPase cycle  
TNFR1-induced NFkappaB signaling pathway  
RHOQ GTPase cycle  
Apoptotic factor-mediated response  
DDX58/IFIH1-mediated induction of interferon-alpha/beta  
Cytochrome c-mediated apoptotic response  
NF-kB activation through FADD/RIP-1 pathway mediated by caspase-8 and -10

---

**62 elements included exclusively in "WT Barcelona":**

---

Translation

Respiratory electron transport  
Metabolism of RNA  
The citric acid (TCA) cycle and respiratory electron transport  
Respiratory electron transport, ATP synthesis by chemiosmotic coupling, and heat production by uncoupling proteins.  
Response of EIF2AK4 (GCN2) to amino acid deficiency  
SRP-dependent cotranslational protein targeting to membrane  
Selenoamino acid metabolism  
Eukaryotic Translation Initiation  
Cap-dependent Translation Initiation  
L13a-mediated translational silencing of Ceruloplasmin expression  
GTP hydrolysis and joining of the 60S ribosomal subunit  
Transport of small molecules  
Cellular response to starvation  
Influenza Infection  
Influenza Viral RNA Transcription and Replication  
Formation of a pool of free 40S subunits  
Membrane Trafficking  
Selenocysteine synthesis  
Vesicle-mediated transport  
Peptide chain elongation  
Viral mRNA Translation  
M Phase  
Eukaryotic Translation Elongation  
Eukaryotic Translation Termination  
SARS-CoV Infections  
Nonsense Mediated Decay (NMD) independent of the Exon Junction Complex (EJC)  
Complex I biogenesis  
Mitochondrial translation initiation  
DNA Repair

SARS-CoV-2 Infection  
Mitochondrial translation  
Mitochondrial translation elongation  
Mitochondrial translation termination  
Nonsense-Mediated Decay (NMD)  
Nonsense Mediated Decay (NMD) enhanced by the Exon Junction Complex (EJC)  
Global Genome Nucleotide Excision Repair (GG-NER)  
Nucleotide Excision Repair  
SARS-CoV-2-host interactions  
Formation of Incision Complex in GG-NER  
Asparagine N-linked glycosylation  
Activation of the mRNA upon binding of the cap-binding complex and eIFs, and subsequent binding to 43S  
rRNA processing  
Formation of the ternary complex, and subsequently, the 43S complex  
Translation initiation complex formation  
Ribosomal scanning and start codon recognition  
rRNA processing in the nucleus and cytosol  
Regulation of TP53 Activity through Phosphorylation  
Transcription-Coupled Nucleotide Excision Repair (TC-NER)  
Dual incision in TC-NER  
Golgi-to-ER retrograde transport  
Major pathway of rRNA processing in the nucleolus and cytosol  
COPI-dependent Golgi-to-ER retrograde traffic  
Gap-filling DNA repair synthesis and ligation in TC-NER  
Dual Incision in GG-NER  
ER to Golgi Anterograde Transport  
SARS-CoV-2 modulates host translation machinery  
Intra-Golgi and retrograde Golgi-to-ER traffic  
COPI-mediated anterograde transport

Transport to the Golgi and subsequent modification  
SARS-CoV-2 activates/modulates innate and adaptive immune responses  
RAC2 GTPase cycle

---

**21 elements included exclusively in "TP53 altered":**

---

Interferon alpha/beta signaling  
Interferon Signaling  
Signaling by Receptor Tyrosine Kinases  
Signaling by Leptin  
Signaling by Erythropoietin  
Antigen activates B Cell Receptor (BCR) leading to generation of second messengers  
Interferon gamma signaling  
FCERI mediated MAPK activation  
OAS antiviral response  
DAP12 signaling  
Antiviral mechanism by IFN-stimulated genes  
Activation of caspases through apoptosome-mediated cleavage  
PI5P, PP2A and IER3 Regulate PI3K/AKT Signaling  
SMAC (DIABLO) binds to IAPs  
SMAC(DIABLO)-mediated dissociation of IAP:caspase complexes  
Negative regulation of the PI3K/AKT network  
SMAC, XIAP-regulated apoptotic response  
DAP12 interactions  
Signaling by FLT3 fusion proteins  
Interleukin-23 signaling  
STAT5 activation downstream of FLT3 ITD mutants

---

**18 elements included exclusively in "Trisomy 12":**

---

RIPK1-mediated regulated necrosis

Regulation of necroptotic cell death  
Regulated Necrosis  
Signaling by PDGF  
Signaling by FGFR1 in disease  
Interleukin receptor SHC signaling  
TNF receptor superfamily (TNFSF) members mediating non-canonical NF-kB pathway  
Signaling by cytosolic FGFR1 fusion mutants  
Regulation by c-FLIP  
CASP8 activity is inhibited  
Dimerization of procaspase-8  
Signaling by ALK in cancer  
Signaling by ALK fusions and activated point mutants  
FGFR1 mutant receptor activation  
Signaling by MET  
Signaling by NTRKs  
MHC class II antigen presentation  
Caspase activation via Death Receptors in the presence of ligand

**Supplementary Table 6. Significant lncRNAs associated with a shorter Time-To-Treatment (TTT) in 266 CLL (ICGC).**

| <b>NAME</b>   | <b>ENSMBL CODE</b> | <b>HR</b> | <b>CI 95% (min)</b> | <b>CI 95% (max)</b> | <b>P-value</b> | <b>Adjusted P-value</b> |
|---------------|--------------------|-----------|---------------------|---------------------|----------------|-------------------------|
| RP11-147L13.2 | ENSG00000265100    | 1.59      | 1.39                | 1.82                | 1.70E-11       | 7.12E-09                |
| MIR4458HG     | ENSG00000247516    | 1.53      | 1.37                | 1.72                | 1.70E-13       | 1.58E-10                |
| RNU2-6P       | ENSG00000223336    | 1.52      | 1.33                | 1.73                | 6.80E-10       | 1.36E-07                |
| RP11-637N19.1 | ENSG00000279885    | 1.51      | 1.34                | 1.69                | 3.30E-12       | 1.78E-09                |
| ZNF667-AS1    | ENSG00000166770    | 1.48      | 1.29                | 1.70                | 3.10E-08       | 3.22E-06                |
| RP11-127I20.5 | ENSG00000267077    | 1.47      | 1.30                | 1.65                | 1.60E-10       | 3.92E-08                |
| ABCA9-AS1     | ENSG00000231749    | 1.46      | 1.27                | 1.66                | 3.40E-08       | 3.45E-06                |
| DLEU2         | ENSG00000231607    | 1.45      | 1.26                | 1.67                | 2.60E-07       | 1.79E-05                |
| RP11-114F3.4  | ENSG00000277895    | 1.44      | 1.31                | 1.59                | 2.60E-13       | 2.19E-10                |
| RP11-311C24.1 | ENSG00000260772    | 1.44      | 1.28                | 1.63                | 4.10E-09       | 6.05E-07                |
| AC006011.4    | ENSG00000244563    | 1.44      | 1.30                | 1.60                | 2.00E-12       | 1.18E-09                |
| RP11-289I10.2 | ENSG00000223612    | 1.44      | 1.29                | 1.61                | 5.20E-11       | 1.61E-08                |
| AGPAT4-IT1    | ENSG00000279355    | 1.44      | 1.29                | 1.60                | 4.50E-11       | 1.50E-08                |
| KCNJ2-AS1     | ENSG00000267365    | 1.43      | 1.27                | 1.61                | 2.80E-09       | 4.66E-07                |
| ATP8B5P       | ENSG00000179766    | 1.43      | 1.27                | 1.62                | 6.50E-09       | 8.79E-07                |
| PTGES3P1      | ENSG00000234518    | 1.43      | 1.26                | 1.63                | 8.20E-08       | 7.49E-06                |
| RP11-47A8.5   | ENSG00000272933    | 1.43      | 1.24                | 1.65                | 1.00E-06       | 5.15E-05                |
| EHMT1-IT1     | ENSG00000281796    | 1.43      | 1.27                | 1.61                | 4.40E-09       | 6.42E-07                |
| SCARNA2       | ENSG00000278249    | 1.43      | 1.23                | 1.66                | 2.70E-06       | 1.11E-04                |
| RNPS1P1       | ENSG00000250896    | 1.43      | 1.26                | 1.62                | 5.40E-08       | 5.23E-06                |
| RP11-416N2.4  | ENSG00000273108    | 1.43      | 1.23                | 1.65                | 2.60E-06       | 1.08E-04                |
| RP5-956O18.2  | ENSG00000227006    | 1.42      | 1.27                | 1.59                | 1.40E-09       | 2.52E-07                |
| RP11-226M10.3 | ENSG00000279281    | 1.42      | 1.24                | 1.62                | 2.10E-07       | 1.53E-05                |
| RP11-119F19.5 | ENSG00000280355    | 1.41      | 1.22                | 1.63                | 3.10E-06       | 1.23E-04                |
| LAMA5-AS1     | ENSG00000228812    | 1.41      | 1.23                | 1.62                | 1.20E-06       | 5.86E-05                |
| USP3-AS1      | ENSG00000259248    | 1.41      | 1.26                | 1.58                | 3.60E-09       | 5.56E-07                |
| PPP4R1L       | ENSG00000124224    | 1.41      | 1.24                | 1.60                | 1.40E-07       | 1.13E-05                |

|                      |                 |      |      |      |          |          |
|----------------------|-----------------|------|------|------|----------|----------|
| <b>BEND3P3</b>       | ENSG00000278616 | 1.41 | 1.23 | 1.60 | 4.30E-07 | 2.61E-05 |
| <b>ZNRF2P1</b>       | ENSG00000237004 | 1.40 | 1.22 | 1.61 | 1.20E-06 | 5.86E-05 |
| <b>LLNLR-285B5.1</b> | ENSG00000276578 | 1.40 | 1.26 | 1.57 | 2.10E-09 | 3.68E-07 |
| <b>RP11-432I5.8</b>  | ENSG00000261513 | 1.40 | 1.23 | 1.60 | 3.50E-07 | 2.24E-05 |
| <b>RP11-165D6.1</b>  | ENSG00000278462 | 1.40 | 1.21 | 1.63 | 1.10E-05 | 3.50E-04 |
| <b>CTC-471C19.1</b>  | ENSG00000261037 | 1.40 | 1.26 | 1.55 | 1.00E-10 | 2.65E-08 |
| <b>RP1-159A19.4</b>  | ENSG00000237429 | 1.40 | 1.27 | 1.53 | 8.90E-13 | 6.42E-10 |
| <b>RP11-793H13.8</b> | ENSG00000257379 | 1.39 | 1.26 | 1.53 | 1.40E-11 | 6.06E-09 |
| <b>RP11-327F22.6</b> | ENSG00000270120 | 1.39 | 1.23 | 1.57 | 1.90E-07 | 1.42E-05 |
| <b>RP11-626G11.3</b> | ENSG00000261759 | 1.39 | 1.22 | 1.57 | 2.90E-07 | 1.92E-05 |
| <b>RP13-104F24.3</b> | ENSG00000265298 | 1.38 | 1.24 | 1.54 | 3.50E-09 | 5.54E-07 |
| <b>RP11-25L3.3</b>   | ENSG00000263655 | 1.38 | 1.24 | 1.55 | 1.20E-08 | 1.43E-06 |
| <b>PIK3CD-AS2</b>    | ENSG00000231789 | 1.38 | 1.21 | 1.58 | 1.20E-06 | 5.86E-05 |
| <b>HNRNPA1P49</b>    | ENSG00000233231 | 1.38 | 1.20 | 1.60 | 8.20E-06 | 2.75E-04 |
| <b>LOC440461</b>     | ENSG00000267472 | 1.38 | 1.22 | 1.56 | 2.90E-07 | 1.92E-05 |
| <b>NA</b>            | ENSG00000280777 | 1.38 | 1.22 | 1.55 | 1.90E-07 | 1.42E-05 |
| <b>CTA-268H5.12</b>  | ENSG00000273353 | 1.38 | 1.21 | 1.56 | 1.20E-06 | 5.86E-05 |
| <b>AC159540.1</b>    | ENSG00000230606 | 1.37 | 1.21 | 1.56 | 9.00E-07 | 4.75E-05 |
| <b>CTD-2013N24.2</b> | ENSG00000244513 | 1.37 | 1.18 | 1.60 | 4.10E-05 | 1.02E-03 |
| <b>RP11-424C20.2</b> | ENSG00000256663 | 1.37 | 1.21 | 1.55 | 4.20E-07 | 2.58E-05 |
| <b>RP11-46H11.3</b>  | ENSG00000250790 | 1.37 | 1.21 | 1.55 | 4.70E-07 | 2.80E-05 |
| <b>DUSP8P3</b>       | ENSG00000215097 | 1.37 | 1.16 | 1.62 | 2.30E-04 | 3.92E-03 |
| <b>RP11-797H7.5</b>  | ENSG00000189316 | 1.37 | 1.24 | 1.51 | 1.10E-09 | 2.07E-07 |
| <b>AC006128.2</b>    | ENSG00000279716 | 1.36 | 1.21 | 1.54 | 6.00E-07 | 3.39E-05 |
| <b>KLKP1</b>         | ENSG00000197588 | 1.36 | 1.22 | 1.53 | 8.20E-08 | 7.49E-06 |
| <b>RP11-138C9.1</b>  | ENSG00000264558 | 1.36 | 1.24 | 1.50 | 8.20E-11 | 2.39E-08 |
| <b>RP11-23P13.6</b>  | ENSG00000174171 | 1.36 | 1.18 | 1.58 | 4.20E-05 | 1.04E-03 |
| <b>RP11-864I4.4</b>  | ENSG00000257058 | 1.36 | 1.24 | 1.49 | 4.80E-11 | 1.52E-08 |
| <b>RP11-603J24.7</b> | ENSG00000237493 | 1.36 | 1.18 | 1.57 | 1.60E-05 | 4.76E-04 |

|                      |                 |      |      |      |          |          |
|----------------------|-----------------|------|------|------|----------|----------|
| <b>RP11-397P13.7</b> | ENSG00000223505 | 1.36 | 1.18 | 1.57 | 2.60E-05 | 7.06E-04 |
| <b>FIRRE</b>         | ENSG00000213468 | 1.36 | 1.20 | 1.54 | 1.40E-06 | 6.58E-05 |
| <b>LINC00545</b>     | ENSG00000236094 | 1.36 | 1.21 | 1.52 | 1.90E-07 | 1.42E-05 |
| <b>ABALON</b>        | ENSG00000281376 | 1.36 | 1.15 | 1.60 | 2.30E-04 | 3.92E-03 |
| <b>LEMD1-AS1</b>     | ENSG00000226235 | 1.36 | 1.21 | 1.53 | 2.40E-07 | 1.68E-05 |
| <b>AC087491.2</b>    | ENSG00000214546 | 1.36 | 1.21 | 1.52 | 8.40E-08 | 7.62E-06 |
| <b>CTA-384D8.36</b>  | ENSG00000272821 | 1.36 | 1.22 | 1.51 | 7.70E-09 | 9.99E-07 |
| <b>RP11-430C7.5</b>  | ENSG00000240219 | 1.36 | 1.20 | 1.54 | 2.30E-06 | 9.76E-05 |
| <b>RP11-273B20.1</b> | ENSG00000256967 | 1.36 | 1.15 | 1.59 | 2.10E-04 | 3.66E-03 |
| <b>UQCRFS1P1</b>     | ENSG00000226085 | 1.35 | 1.20 | 1.53 | 1.60E-06 | 7.24E-05 |
| <b>RP11-456H18.2</b> | ENSG00000229896 | 1.35 | 1.18 | 1.56 | 2.10E-05 | 5.94E-04 |
| <b>CTD-2373N4.5</b>  | ENSG00000253112 | 1.35 | 1.18 | 1.55 | 8.40E-06 | 2.80E-04 |
| <b>RP11-37N22.1</b>  | ENSG00000214803 | 1.35 | 1.20 | 1.52 | 4.30E-07 | 2.61E-05 |
| <b>HNRNPA1P4</b>     | ENSG00000206228 | 1.35 | 1.22 | 1.50 | 2.40E-08 | 2.62E-06 |
| <b>AC092620.2</b>    | ENSG00000241772 | 1.35 | 1.16 | 1.58 | 1.40E-04 | 2.68E-03 |
| <b>CTC-343N3.1</b>   | ENSG00000183562 | 1.35 | 1.19 | 1.54 | 4.60E-06 | 1.72E-04 |
| <b>LINC01023</b>     | ENSG00000272523 | 1.35 | 1.17 | 1.56 | 4.30E-05 | 1.06E-03 |
| <b>AC092171.4</b>    | ENSG00000230733 | 1.35 | 1.18 | 1.55 | 1.50E-05 | 4.56E-04 |
| <b>RN7SL449P</b>     | ENSG00000242889 | 1.35 | 1.20 | 1.51 | 3.80E-07 | 2.37E-05 |
| <b>RP1-30M3.6</b>    | ENSG00000272402 | 1.35 | 1.18 | 1.53 | 6.40E-06 | 2.22E-04 |
| <b>RP11-820K3.3</b>  | ENSG00000203437 | 1.35 | 1.17 | 1.55 | 2.10E-05 | 5.94E-04 |
| <b>RP11-816J6.3</b>  | ENSG00000269889 | 1.35 | 1.15 | 1.58 | 2.40E-04 | 4.05E-03 |
| <b>CTD-2339M3.1</b>  | ENSG00000242602 | 1.35 | 1.19 | 1.52 | 2.40E-06 | 1.00E-04 |
| <b>RP11-331F9.4</b>  | ENSG00000227933 | 1.35 | 1.17 | 1.55 | 3.30E-05 | 8.50E-04 |
| <b>KRT19P2</b>       | ENSG00000216306 | 1.35 | 1.18 | 1.54 | 1.60E-05 | 4.76E-04 |
| <b>CASC11</b>        | ENSG00000249375 | 1.34 | 1.19 | 1.52 | 2.10E-06 | 9.00E-05 |
| <b>RP11-379K17.2</b> | ENSG00000244039 | 1.34 | 1.21 | 1.49 | 2.50E-08 | 2.70E-06 |
| <b>CTD-2340D6.2</b>  | ENSG00000253562 | 1.34 | 1.17 | 1.55 | 4.70E-05 | 1.13E-03 |
| <b>RP11-771K4.3</b>  | ENSG00000275769 | 1.34 | 1.17 | 1.54 | 1.60E-05 | 4.76E-04 |

|                       |                 |      |      |      |          |          |
|-----------------------|-----------------|------|------|------|----------|----------|
| <b>HIST2H2BC</b>      | ENSG00000203819 | 1.34 | 1.19 | 1.52 | 1.80E-06 | 7.97E-05 |
| <b>RP11-263I1.1</b>   | ENSG00000248659 | 1.34 | 1.21 | 1.48 | 7.90E-09 | 1.01E-06 |
| <b>RP11-508N22.12</b> | ENSG00000272983 | 1.34 | 1.18 | 1.53 | 1.30E-05 | 4.01E-04 |
| <b>LINC01374</b>      | ENSG00000280560 | 1.34 | 1.20 | 1.50 | 2.40E-07 | 1.68E-05 |
| <b>RP11-946P6.4</b>   | ENSG00000279360 | 1.34 | 1.23 | 1.47 | 1.10E-10 | 2.80E-08 |
| <b>AP000692.9</b>     | ENSG00000228107 | 1.34 | 1.16 | 1.55 | 7.00E-05 | 1.56E-03 |
| <b>HIST2H2BD</b>      | ENSG00000220323 | 1.34 | 1.19 | 1.51 | 1.20E-06 | 5.86E-05 |
| <b>RP13-104F24.2</b>  | ENSG00000215769 | 1.34 | 1.16 | 1.54 | 5.80E-05 | 1.34E-03 |
| <b>OTUD4P1</b>        | ENSG00000118976 | 1.34 | 1.19 | 1.50 | 6.30E-07 | 3.48E-05 |
| <b>COX7BP2</b>        | ENSG00000234274 | 1.34 | 1.22 | 1.46 | 9.80E-11 | 2.65E-08 |
| <b>RP11-126K15.1</b>  | ENSG00000265380 | 1.34 | 1.18 | 1.51 | 4.10E-06 | 1.57E-04 |
| <b>BIRC6-AS2</b>      | ENSG00000279897 | 1.34 | 1.18 | 1.52 | 9.40E-06 | 3.07E-04 |
| <b>CERS6-AS1</b>      | ENSG00000227617 | 1.34 | 1.16 | 1.53 | 4.40E-05 | 1.07E-03 |
| <b>MARCKSL1P1</b>     | ENSG00000213277 | 1.34 | 1.17 | 1.53 | 2.80E-05 | 7.49E-04 |
| <b>RP11-378A13.2</b>  | ENSG00000273361 | 1.33 | 1.19 | 1.49 | 6.10E-07 | 3.41E-05 |
| <b>RP11-161H23.5</b>  | ENSG00000258232 | 1.33 | 1.13 | 1.57 | 5.50E-04 | 7.70E-03 |
| <b>RP11-77H9.6</b>    | ENSG00000261481 | 1.33 | 1.16 | 1.53 | 5.40E-05 | 1.27E-03 |
| <b>RP11-342K2.1</b>   | ENSG00000279133 | 1.33 | 1.12 | 1.59 | 1.20E-03 | 1.35E-02 |
| <b>RP11-171I2.1</b>   | ENSG00000267784 | 1.33 | 1.16 | 1.53 | 4.30E-05 | 1.06E-03 |
| <b>NA</b>             | ENSG00000250232 | 1.33 | 1.16 | 1.53 | 5.40E-05 | 1.27E-03 |
| <b>RP3-424M6.4</b>    | ENSG00000278993 | 1.33 | 1.12 | 1.58 | 1.00E-03 | 1.19E-02 |
| <b>STRCP1</b>         | ENSG00000166763 | 1.33 | 1.22 | 1.46 | 6.40E-10 | 1.30E-07 |
| <b>RP11-327F22.4</b>  | ENSG00000260616 | 1.33 | 1.16 | 1.53 | 6.30E-05 | 1.42E-03 |
| <b>RP11-572B2.1</b>   | ENSG00000268509 | 1.33 | 1.20 | 1.48 | 9.70E-08 | 8.45E-06 |
| <b>RP11-386I14.4</b>  | ENSG00000273338 | 1.33 | 1.21 | 1.46 | 5.60E-09 | 8.08E-07 |
| <b>RP11-188C12.2</b>  | ENSG00000255585 | 1.33 | 1.12 | 1.57 | 9.50E-04 | 1.17E-02 |
| <b>RP11-505K9.1</b>   | ENSG00000260018 | 1.33 | 1.16 | 1.51 | 2.20E-05 | 6.14E-04 |
| <b>RP4-565E6.1</b>    | ENSG00000227733 | 1.33 | 1.17 | 1.50 | 5.90E-06 | 2.08E-04 |
| <b>SNAP47-AS1</b>     | ENSG00000230005 | 1.33 | 1.14 | 1.54 | 1.80E-04 | 3.24E-03 |

|                      |                 |      |      |      |          |          |
|----------------------|-----------------|------|------|------|----------|----------|
| <b>RP11-513I15.6</b> | ENSG00000225339 | 1.32 | 1.16 | 1.51 | 3.00E-05 | 7.90E-04 |
| <b>RPL34P21</b>      | ENSG00000244451 | 1.32 | 1.22 | 1.44 | 4.00E-11 | 1.37E-08 |
| <b>U91328.21</b>     | ENSG00000272558 | 1.32 | 1.22 | 1.43 | 4.50E-12 | 2.25E-09 |
| <b>SPG20-AS1</b>     | ENSG00000120664 | 1.32 | 1.15 | 1.52 | 7.20E-05 | 1.59E-03 |
| <b>RP11-44N21.1</b>  | ENSG00000257556 | 1.32 | 1.16 | 1.50 | 2.00E-05 | 5.77E-04 |
| <b>FLJ33360</b>      | ENSG00000250490 | 1.32 | 1.16 | 1.50 | 2.40E-05 | 6.63E-04 |
| <b>RP11-25L3.1</b>   | ENSG00000278902 | 1.32 | 1.14 | 1.52 | 1.50E-04 | 2.82E-03 |
| <b>RP11-33N14.3</b>  | ENSG00000277873 | 1.32 | 1.14 | 1.54 | 3.00E-04 | 4.83E-03 |
| <b>AC008277.1</b>    | ENSG00000223642 | 1.32 | 1.20 | 1.45 | 8.60E-09 | 1.08E-06 |
| <b>MALAT1</b>        | ENSG00000251562 | 1.32 | 1.18 | 1.48 | 1.50E-06 | 6.88E-05 |
| <b>RP11-350N15.6</b> | ENSG00000272159 | 1.32 | 1.16 | 1.50 | 2.80E-05 | 7.49E-04 |
| <b>RP11-118E18.4</b> | ENSG00000263499 | 1.32 | 1.18 | 1.47 | 6.20E-07 | 3.44E-05 |
| <b>RP11-211G3.3</b>  | ENSG00000228804 | 1.32 | 1.14 | 1.52 | 1.30E-04 | 2.53E-03 |
| <b>CTD-2354A18.1</b> | ENSG00000261780 | 1.32 | 1.14 | 1.52 | 1.80E-04 | 3.24E-03 |
| <b>ZEB2P1</b>        | ENSG00000249506 | 1.32 | 1.19 | 1.46 | 1.70E-07 | 1.32E-05 |
| <b>RP5-1057I20.5</b> | ENSG00000276691 | 1.32 | 1.15 | 1.51 | 7.10E-05 | 1.58E-03 |
| <b>RP11-386M24.6</b> | ENSG00000260337 | 1.32 | 1.12 | 1.55 | 1.20E-03 | 1.35E-02 |
| <b>CH17-437K3.1</b>  | ENSG00000227082 | 1.32 | 1.20 | 1.45 | 1.50E-08 | 1.74E-06 |
| <b>RP5-849H19.3</b>  | ENSG00000278967 | 1.32 | 1.13 | 1.53 | 4.70E-04 | 6.79E-03 |
| <b>RP11-106D4.2</b>  | ENSG00000276337 | 1.32 | 1.16 | 1.49 | 1.10E-05 | 3.50E-04 |
| <b>FLJ46284</b>      | ENSG00000248858 | 1.31 | 1.20 | 1.44 | 3.60E-09 | 5.56E-07 |
| <b>TBC1D27</b>       | ENSG00000128438 | 1.31 | 1.13 | 1.53 | 3.60E-04 | 5.54E-03 |
| <b>RP11-268P4.6</b>  | ENSG00000274885 | 1.31 | 1.15 | 1.50 | 3.80E-05 | 9.65E-04 |
| <b>CTB-96E2.3</b>    | ENSG00000258924 | 1.31 | 1.13 | 1.53 | 4.00E-04 | 5.97E-03 |
| <b>RP11-36B15.1</b>  | ENSG00000248936 | 1.31 | 1.21 | 1.43 | 4.50E-10 | 9.90E-08 |
| <b>RP11-519C12.1</b> | ENSG00000259935 | 1.31 | 1.18 | 1.46 | 5.00E-07 | 2.94E-05 |
| <b>BTBD9-AS1</b>     | ENSG00000226533 | 1.31 | 1.17 | 1.48 | 6.10E-06 | 2.15E-04 |
| <b>GAPDHP60</b>      | ENSG00000248180 | 1.31 | 1.19 | 1.45 | 1.20E-07 | 9.92E-06 |
| <b>ALMS1-IT1</b>     | ENSG00000230002 | 1.31 | 1.15 | 1.50 | 7.90E-05 | 1.73E-03 |

|                       |                 |      |      |      |          |          |
|-----------------------|-----------------|------|------|------|----------|----------|
| <b>RP11-496H1.1</b>   | ENSG00000249626 | 1.31 | 1.17 | 1.47 | 5.80E-06 | 2.06E-04 |
| <b>DPYD-AS2</b>       | ENSG00000235777 | 1.31 | 1.11 | 1.55 | 1.60E-03 | 1.66E-02 |
| <b>MTND5P1</b>        | ENSG00000227999 | 1.31 | 1.20 | 1.43 | 1.40E-09 | 2.52E-07 |
| <b>KRT8P34</b>        | ENSG00000264663 | 1.31 | 1.14 | 1.51 | 1.60E-04 | 2.97E-03 |
| <b>RP11-44M6.7</b>    | ENSG00000274272 | 1.31 | 1.14 | 1.51 | 2.10E-04 | 3.66E-03 |
| <b>AMZ2P1</b>         | ENSG00000214174 | 1.31 | 1.19 | 1.45 | 1.10E-07 | 9.27E-06 |
| <b>RP11-2C24.4</b>    | ENSG00000260899 | 1.31 | 1.18 | 1.45 | 1.90E-07 | 1.42E-05 |
| <b>RP11-196G18.22</b> | ENSG00000261716 | 1.31 | 1.18 | 1.45 | 2.80E-07 | 1.88E-05 |
| <b>RP11-727A23.7</b>  | ENSG00000254551 | 1.31 | 1.16 | 1.47 | 8.50E-06 | 2.83E-04 |
| <b>AP000295.10</b>    | ENSG00000272659 | 1.31 | 1.20 | 1.42 | 1.10E-09 | 2.07E-07 |
| <b>HNRNPCP2</b>       | ENSG00000204253 | 1.31 | 1.16 | 1.47 | 1.10E-05 | 3.50E-04 |
| <b>AC007386.4</b>     | ENSG00000232613 | 1.31 | 1.14 | 1.50 | 1.70E-04 | 3.10E-03 |
| <b>RP11-820I16.4</b>  | ENSG00000273141 | 1.31 | 1.19 | 1.44 | 3.30E-08 | 3.40E-06 |
| <b>RN7SL733P</b>      | ENSG00000273946 | 1.31 | 1.13 | 1.51 | 4.30E-04 | 6.33E-03 |
| <b>ZEB1-AS1</b>       | ENSG00000237036 | 1.31 | 1.18 | 1.45 | 3.20E-07 | 2.08E-05 |
| <b>RP11-227H4.5</b>   | ENSG00000248839 | 1.30 | 1.15 | 1.48 | 3.60E-05 | 9.18E-04 |
| <b>AC195454.1</b>     | ENSG00000249241 | 1.30 | 1.15 | 1.48 | 2.20E-05 | 6.14E-04 |
| <b>RP4-597N16.4</b>   | ENSG00000273416 | 1.30 | 1.17 | 1.45 | 8.20E-07 | 4.38E-05 |
| <b>CTB-52I2.3</b>     | ENSG00000268623 | 1.30 | 1.13 | 1.51 | 3.10E-04 | 4.94E-03 |
| <b>RP1-223E5.4</b>    | ENSG00000261071 | 1.30 | 1.12 | 1.51 | 4.60E-04 | 6.67E-03 |
| <b>RP11-888D10.4</b>  | ENSG00000273284 | 1.30 | 1.14 | 1.49 | 6.90E-05 | 1.54E-03 |
| <b>RP11-478C6.1</b>   | ENSG00000251535 | 1.30 | 1.20 | 1.41 | 5.50E-11 | 1.66E-08 |
| <b>METTL15P3</b>      | ENSG00000224396 | 1.30 | 1.18 | 1.43 | 5.70E-08 | 5.48E-06 |
| <b>L3MBTL4-AS1</b>    | ENSG00000264707 | 1.30 | 1.15 | 1.48 | 3.20E-05 | 8.34E-04 |
| <b>RP3-510O8.4</b>    | ENSG00000232909 | 1.30 | 1.18 | 1.44 | 5.00E-07 | 2.94E-05 |
| <b>PCAT6</b>          | ENSG00000228288 | 1.30 | 1.16 | 1.46 | 5.40E-06 | 1.95E-04 |
| <b>RP11-536C5.7</b>   | ENSG00000227741 | 1.30 | 1.13 | 1.50 | 3.00E-04 | 4.83E-03 |
| <b>AP003774.1</b>     | ENSG00000236935 | 1.30 | 1.13 | 1.49 | 1.80E-04 | 3.24E-03 |
| <b>RP11-240G22.5</b>  | ENSG00000274554 | 1.30 | 1.13 | 1.50 | 2.20E-04 | 3.79E-03 |

|                      |                 |      |      |      |          |          |
|----------------------|-----------------|------|------|------|----------|----------|
| <b>AC061992.2</b>    | ENSG00000267737 | 1.30 | 1.13 | 1.50 | 2.10E-04 | 3.66E-03 |
| <b>CTC-510F12.2</b>  | ENSG00000267082 | 1.30 | 1.14 | 1.48 | 7.70E-05 | 1.70E-03 |
| <b>RP11-156E8.1</b>  | ENSG00000272195 | 1.30 | 1.17 | 1.44 | 7.50E-07 | 4.04E-05 |
| <b>AC025442.3</b>    | ENSG00000253744 | 1.30 | 1.14 | 1.48 | 7.40E-05 | 1.64E-03 |
| <b>TPM3P7</b>        | ENSG00000187536 | 1.30 | 1.20 | 1.41 | 4.80E-11 | 1.52E-08 |
| <b>RP1-209B5.2</b>   | ENSG00000218857 | 1.30 | 1.16 | 1.46 | 1.30E-05 | 4.01E-04 |
| <b>RP11-16E23.5</b>  | ENSG00000275638 | 1.30 | 1.14 | 1.48 | 5.40E-05 | 1.27E-03 |
| <b>TRERNA1</b>       | ENSG00000231265 | 1.30 | 1.16 | 1.46 | 8.00E-06 | 2.70E-04 |
| <b>RP11-734K23.9</b> | ENSG00000277701 | 1.30 | 1.15 | 1.47 | 4.30E-05 | 1.06E-03 |
| <b>RP11-480D4.7</b>  | ENSG00000279075 | 1.30 | 1.14 | 1.48 | 6.20E-05 | 1.41E-03 |
| <b>EPB41L4A-AS2</b>  | ENSG00000278921 | 1.30 | 1.14 | 1.48 | 9.70E-05 | 2.04E-03 |
| <b>RP11-203B7.2</b>  | ENSG00000260303 | 1.30 | 1.17 | 1.45 | 1.90E-06 | 8.36E-05 |
| <b>RP11-521C22.2</b> | ENSG00000279863 | 1.30 | 1.14 | 1.48 | 1.20E-04 | 2.39E-03 |
| <b>LINC01516</b>     | ENSG00000231422 | 1.30 | 1.15 | 1.47 | 4.20E-05 | 1.04E-03 |
| <b>RP11-426J5.3</b>  | ENSG00000278983 | 1.30 | 1.15 | 1.46 | 2.30E-05 | 6.38E-04 |
| <b>LINC01063</b>     | ENSG00000232065 | 1.30 | 1.14 | 1.48 | 1.10E-04 | 2.24E-03 |
| <b>CTD-3065J16.9</b> | ENSG00000255224 | 1.30 | 1.11 | 1.51 | 7.50E-04 | 9.75E-03 |
| <b>RP11-927P21.5</b> | ENSG00000263647 | 1.30 | 1.12 | 1.50 | 4.70E-04 | 6.79E-03 |
| <b>RP11-525A16.4</b> | ENSG00000273143 | 1.30 | 1.17 | 1.43 | 2.50E-07 | 1.73E-05 |
| <b>RP11-460N20.7</b> | ENSG00000270948 | 1.30 | 1.16 | 1.45 | 5.50E-06 | 1.98E-04 |
| <b>CH507-254M2.3</b> | ENSG00000280164 | 1.29 | 1.14 | 1.47 | 8.60E-05 | 1.86E-03 |
| <b>RP11-266L9.8</b>  | ENSG00000275494 | 1.29 | 1.17 | 1.43 | 5.40E-07 | 3.11E-05 |
| <b>RP11-85G20.2</b>  | ENSG00000241499 | 1.29 | 1.17 | 1.43 | 9.00E-07 | 4.75E-05 |
| <b>RP4-730K3.3</b>   | ENSG00000232450 | 1.29 | 1.13 | 1.48 | 1.60E-04 | 2.97E-03 |
| <b>RP11-333E13.4</b> | ENSG00000205794 | 1.29 | 1.10 | 1.52 | 1.50E-03 | 1.60E-02 |
| <b>LINC00552</b>     | ENSG00000279770 | 1.29 | 1.15 | 1.45 | 9.00E-06 | 2.95E-04 |
| <b>TUBB7P</b>        | ENSG00000251297 | 1.29 | 1.13 | 1.48 | 2.10E-04 | 3.66E-03 |
| <b>RP11-625L16.3</b> | ENSG00000256482 | 1.29 | 1.16 | 1.45 | 6.60E-06 | 2.27E-04 |
| <b>RP11-118E18.2</b> | ENSG00000266100 | 1.29 | 1.15 | 1.45 | 1.30E-05 | 4.01E-04 |

|                      |                 |      |      |      |          |          |
|----------------------|-----------------|------|------|------|----------|----------|
| <b>H2AFZP1</b>       | ENSG00000213440 | 1.29 | 1.17 | 1.43 | 8.70E-07 | 4.63E-05 |
| <b>RP11-317B3.2</b>  | ENSG00000237593 | 1.29 | 1.13 | 1.47 | 1.30E-04 | 2.53E-03 |
| <b>RP11-103B5.4</b>  | ENSG00000277840 | 1.29 | 1.14 | 1.47 | 7.10E-05 | 1.58E-03 |
| <b>RP11-16E23.4</b>  | ENSG00000259924 | 1.29 | 1.13 | 1.48 | 1.60E-04 | 2.97E-03 |
| <b>MIR222HG</b>      | ENSG00000270069 | 1.29 | 1.11 | 1.50 | 8.30E-04 | 1.06E-02 |
| <b>LINC01353</b>     | ENSG00000231507 | 1.29 | 1.16 | 1.44 | 6.40E-06 | 2.22E-04 |
| <b>LA16c-390E6.5</b> | ENSG00000261641 | 1.29 | 1.15 | 1.45 | 1.90E-05 | 5.54E-04 |
| <b>PRICKLE2-AS3</b>  | ENSG00000226017 | 1.29 | 1.18 | 1.41 | 1.90E-08 | 2.13E-06 |
| <b>IGKV1OR-2</b>     | ENSG00000156755 | 1.29 | 1.17 | 1.43 | 6.10E-07 | 3.41E-05 |
| <b>SNHG19</b>        | ENSG00000260260 | 1.29 | 1.15 | 1.45 | 2.60E-05 | 7.06E-04 |
| <b>ISCA1P1</b>       | ENSG00000217416 | 1.29 | 1.15 | 1.44 | 8.10E-06 | 2.73E-04 |
| <b>AC006077.3</b>    | ENSG00000279799 | 1.29 | 1.10 | 1.51 | 1.50E-03 | 1.60E-02 |
| <b>BNIP3P41</b>      | ENSG00000248302 | 1.29 | 1.13 | 1.46 | 9.80E-05 | 2.06E-03 |
| <b>RP11-759L5.2</b>  | ENSG00000235071 | 1.29 | 1.15 | 1.45 | 1.80E-05 | 5.29E-04 |
| <b>HYDIN2</b>        | ENSG00000276975 | 1.29 | 1.16 | 1.43 | 4.50E-06 | 1.68E-04 |
| <b>RP11-177H13.2</b> | ENSG00000253837 | 1.29 | 1.10 | 1.50 | 1.30E-03 | 1.43E-02 |
| <b>KB-1732A1.1</b>   | ENSG00000253669 | 1.29 | 1.15 | 1.44 | 1.50E-05 | 4.56E-04 |
| <b>EIF4HP1</b>       | ENSG00000233830 | 1.29 | 1.12 | 1.48 | 3.80E-04 | 5.76E-03 |
| <b>CH17-302M23.1</b> | ENSG00000275552 | 1.29 | 1.13 | 1.46 | 8.40E-05 | 1.83E-03 |
| <b>CTD-2017C7.3</b>  | ENSG00000259161 | 1.29 | 1.13 | 1.46 | 1.30E-04 | 2.53E-03 |
| <b>RP11-611O2.3</b>  | ENSG00000256664 | 1.29 | 1.12 | 1.48 | 4.20E-04 | 6.20E-03 |
| <b>ADAMTSL4-AS1</b>  | ENSG00000203804 | 1.29 | 1.13 | 1.46 | 1.30E-04 | 2.53E-03 |
| <b>SCGB1B2P</b>      | ENSG00000268751 | 1.29 | 1.15 | 1.44 | 1.30E-05 | 4.01E-04 |
| <b>PIPSL</b>         | ENSG00000180764 | 1.29 | 1.12 | 1.47 | 3.50E-04 | 5.42E-03 |
| <b>AP001059.6</b>    | ENSG00000278158 | 1.29 | 1.11 | 1.49 | 8.60E-04 | 1.09E-02 |
| <b>AP006621.8</b>    | ENSG00000255108 | 1.28 | 1.15 | 1.44 | 1.20E-05 | 3.76E-04 |
| <b>RP11-361D15.2</b> | ENSG00000259238 | 1.28 | 1.14 | 1.44 | 2.50E-05 | 6.85E-04 |
| <b>SRP72P2</b>       | ENSG00000188451 | 1.28 | 1.15 | 1.44 | 1.00E-05 | 3.23E-04 |
| <b>RN7SL288P</b>     | ENSG00000240767 | 1.28 | 1.14 | 1.45 | 5.50E-05 | 1.29E-03 |

|                      |                 |      |      |      |          |          |
|----------------------|-----------------|------|------|------|----------|----------|
| <b>SLC7A5P1</b>      | ENSG00000260727 | 1.28 | 1.09 | 1.51 | 2.30E-03 | 2.19E-02 |
| <b>RP11-281P23.1</b> | ENSG00000251152 | 1.28 | 1.13 | 1.46 | 1.30E-04 | 2.53E-03 |
| <b>RPL4P6</b>        | ENSG00000230071 | 1.28 | 1.10 | 1.50 | 2.00E-03 | 1.95E-02 |
| <b>CTC-436P18.1</b>  | ENSG00000251279 | 1.28 | 1.15 | 1.43 | 4.80E-06 | 1.77E-04 |
| <b>RP11-401N16.2</b> | ENSG00000275381 | 1.28 | 1.18 | 1.39 | 1.20E-09 | 2.22E-07 |
| <b>RP11-386M24.3</b> | ENSG00000258676 | 1.28 | 1.13 | 1.46 | 1.70E-04 | 3.10E-03 |
| <b>RP11-5407.3</b>   | ENSG00000223764 | 1.28 | 1.19 | 1.39 | 6.20E-10 | 1.30E-07 |
| <b>CTD-2194F4.2</b>  | ENSG00000248288 | 1.28 | 1.14 | 1.45 | 6.00E-05 | 1.38E-03 |
| <b>RP11-2K6.1</b>    | ENSG00000279225 | 1.28 | 1.14 | 1.45 | 4.70E-05 | 1.13E-03 |
| <b>MARK3P1</b>       | ENSG00000271642 | 1.28 | 1.17 | 1.41 | 3.70E-07 | 2.34E-05 |
| <b>CTD-2026K11.6</b> | ENSG00000203392 | 1.28 | 1.15 | 1.42 | 4.10E-06 | 1.57E-04 |
| <b>UGT2B29P</b>      | ENSG00000250566 | 1.28 | 1.14 | 1.44 | 4.60E-05 | 1.12E-03 |
| <b>RP11-680A11.5</b> | ENSG00000257605 | 1.28 | 1.10 | 1.50 | 1.70E-03 | 1.74E-02 |
| <b>RP11-673C5.1</b>  | ENSG00000259781 | 1.28 | 1.10 | 1.49 | 1.10E-03 | 1.27E-02 |
| <b>RP11-655C2.3</b>  | ENSG00000255299 | 1.28 | 1.11 | 1.48 | 8.30E-04 | 1.06E-02 |
| <b>OR7E102P</b>      | ENSG00000168992 | 1.28 | 1.15 | 1.43 | 1.40E-05 | 4.30E-04 |
| <b>RN7SL800P</b>     | ENSG00000242398 | 1.28 | 1.12 | 1.46 | 3.10E-04 | 4.94E-03 |
| <b>RP11-271M24.2</b> | ENSG00000260509 | 1.28 | 1.13 | 1.45 | 1.30E-04 | 2.53E-03 |
| <b>ZNF849P</b>       | ENSG00000198153 | 1.28 | 1.12 | 1.46 | 3.20E-04 | 5.07E-03 |
| <b>RP13-188A5.1</b>  | ENSG00000227486 | 1.28 | 1.10 | 1.49 | 1.80E-03 | 1.81E-02 |
| <b>CTD-2526A2.4</b>  | ENSG00000279273 | 1.28 | 1.15 | 1.43 | 1.30E-05 | 4.01E-04 |
| <b>MTCYBP21</b>      | ENSG00000224747 | 1.28 | 1.16 | 1.41 | 1.30E-06 | 6.20E-05 |
| <b>RP3-522J7.6</b>   | ENSG00000260613 | 1.28 | 1.16 | 1.41 | 7.60E-07 | 4.08E-05 |
| <b>AC092667.2</b>    | ENSG00000230393 | 1.28 | 1.11 | 1.47 | 7.30E-04 | 9.55E-03 |
| <b>RP11-817I4.1</b>  | ENSG00000274964 | 1.28 | 1.11 | 1.48 | 9.00E-04 | 1.12E-02 |
| <b>RP5-1071N3.1</b>  | ENSG00000231105 | 1.28 | 1.11 | 1.47 | 6.00E-04 | 8.28E-03 |
| <b>RP11-151N17.1</b> | ENSG00000259659 | 1.28 | 1.11 | 1.47 | 4.40E-04 | 6.44E-03 |
| <b>RP11-2J18.1</b>   | ENSG00000218596 | 1.28 | 1.13 | 1.45 | 1.50E-04 | 2.82E-03 |
| <b>TCEB1P19</b>      | ENSG00000241975 | 1.28 | 1.11 | 1.48 | 9.10E-04 | 1.13E-02 |

|                       |                 |      |      |      |          |          |
|-----------------------|-----------------|------|------|------|----------|----------|
| <b>RP11-462G12.1</b>  | ENSG00000262185 | 1.28 | 1.17 | 1.39 | 5.00E-08 | 4.95E-06 |
| <b>RP5-1009E24.8</b>  | ENSG00000275491 | 1.28 | 1.14 | 1.43 | 1.30E-05 | 4.01E-04 |
| <b>RPS2P46</b>        | ENSG00000189343 | 1.28 | 1.17 | 1.40 | 1.10E-07 | 9.27E-06 |
| <b>RP13-36G14.3</b>   | ENSG00000203397 | 1.28 | 1.11 | 1.47 | 9.10E-04 | 1.13E-02 |
| <b>RP11-561I11.3</b>  | ENSG00000224525 | 1.28 | 1.16 | 1.41 | 1.50E-06 | 6.88E-05 |
| <b>AP000783.1</b>     | ENSG00000254667 | 1.28 | 1.13 | 1.44 | 9.90E-05 | 2.06E-03 |
| <b>RN7SKP268</b>      | ENSG00000223039 | 1.28 | 1.10 | 1.48 | 9.80E-04 | 1.19E-02 |
| <b>RP11-480D4.2</b>   | ENSG00000249159 | 1.28 | 1.14 | 1.43 | 4.00E-05 | 1.00E-03 |
| <b>PDCL3P5</b>        | ENSG00000213089 | 1.28 | 1.13 | 1.44 | 1.10E-04 | 2.24E-03 |
| <b>ANXA2P2</b>        | ENSG00000231991 | 1.28 | 1.13 | 1.43 | 5.20E-05 | 1.24E-03 |
| <b>FTH1P4</b>         | ENSG00000242992 | 1.28 | 1.13 | 1.44 | 5.70E-05 | 1.33E-03 |
| <b>RP11-1246C19.1</b> | ENSG00000273230 | 1.27 | 1.15 | 1.42 | 7.00E-06 | 2.40E-04 |
| <b>NDUFV2P1</b>       | ENSG00000267809 | 1.27 | 1.11 | 1.47 | 7.00E-04 | 9.25E-03 |
| <b>RP11-757C15.4</b>  | ENSG00000255296 | 1.27 | 1.16 | 1.39 | 1.70E-07 | 1.32E-05 |
| <b>RP4-568C11.4</b>   | ENSG00000274173 | 1.27 | 1.17 | 1.38 | 9.10E-09 | 1.12E-06 |
| <b>RP11-701H24.7</b>  | ENSG00000271347 | 1.27 | 1.11 | 1.46 | 5.70E-04 | 7.91E-03 |
| <b>RP1-111C20.3</b>   | ENSG00000226032 | 1.27 | 1.15 | 1.41 | 2.70E-06 | 1.11E-04 |
| <b>RP11-455O6.8</b>   | ENSG00000276101 | 1.27 | 1.09 | 1.49 | 2.60E-03 | 2.38E-02 |
| <b>AC005785.5</b>     | ENSG00000279203 | 1.27 | 1.10 | 1.48 | 1.40E-03 | 1.51E-02 |
| <b>RPL7AP2</b>        | ENSG00000241984 | 1.27 | 1.12 | 1.45 | 2.20E-04 | 3.79E-03 |
| <b>RPS18P13</b>       | ENSG00000243455 | 1.27 | 1.10 | 1.47 | 9.40E-04 | 1.16E-02 |
| <b>RP11-71H17.8</b>   | ENSG00000280042 | 1.27 | 1.13 | 1.44 | 1.10E-04 | 2.24E-03 |
| <b>RP11-307C12.13</b> | ENSG00000270361 | 1.27 | 1.10 | 1.47 | 1.10E-03 | 1.27E-02 |
| <b>RP11-184M15.1</b>  | ENSG00000248187 | 1.27 | 1.10 | 1.47 | 1.30E-03 | 1.43E-02 |
| <b>RP11-806L2.6</b>   | ENSG00000265490 | 1.27 | 1.09 | 1.48 | 1.70E-03 | 1.74E-02 |
| <b>ATP8A2P2</b>       | ENSG00000229800 | 1.27 | 1.11 | 1.46 | 6.90E-04 | 9.18E-03 |
| <b>RP11-1049A21.2</b> | ENSG00000257824 | 1.27 | 1.09 | 1.48 | 2.00E-03 | 1.95E-02 |
| <b>CTA-331F8.1</b>    | ENSG00000260865 | 1.27 | 1.17 | 1.38 | 2.80E-09 | 4.66E-07 |
| <b>AP000704.5</b>     | ENSG00000224790 | 1.27 | 1.09 | 1.48 | 1.60E-03 | 1.66E-02 |

|                       |                 |      |      |      |          |          |
|-----------------------|-----------------|------|------|------|----------|----------|
| <b>RP11-464D20.2</b>  | ENSG00000239246 | 1.27 | 1.14 | 1.41 | 7.90E-06 | 2.68E-04 |
| <b>HTATSF1P2</b>      | ENSG00000271361 | 1.27 | 1.12 | 1.44 | 2.60E-04 | 4.33E-03 |
| <b>RP11-544A12.4</b>  | ENSG00000236986 | 1.27 | 1.14 | 1.42 | 3.20E-05 | 8.34E-04 |
| <b>RP11-723O4.2</b>   | ENSG00000231305 | 1.27 | 1.15 | 1.40 | 1.20E-06 | 5.86E-05 |
| <b>CH507-24F1.2</b>   | ENSG00000275496 | 1.27 | 1.15 | 1.40 | 1.80E-06 | 7.97E-05 |
| <b>SMARCA5-AS1</b>    | ENSG00000245112 | 1.27 | 1.09 | 1.48 | 2.40E-03 | 2.26E-02 |
| <b>ACTG1P14</b>       | ENSG00000230581 | 1.27 | 1.10 | 1.46 | 9.50E-04 | 1.17E-02 |
| <b>LINC00865</b>      | ENSG00000232229 | 1.27 | 1.11 | 1.44 | 3.10E-04 | 4.94E-03 |
| <b>CTB-43P18.1</b>    | ENSG00000272742 | 1.27 | 1.15 | 1.40 | 3.30E-06 | 1.29E-04 |
| <b>RP11-227B21.2</b>  | ENSG00000255686 | 1.27 | 1.15 | 1.40 | 3.70E-06 | 1.43E-04 |
| <b>XXYLT1-AS2</b>     | ENSG00000230266 | 1.27 | 1.16 | 1.38 | 1.20E-07 | 9.92E-06 |
| <b>MCRIP2P1</b>       | ENSG00000241418 | 1.27 | 1.12 | 1.43 | 1.30E-04 | 2.53E-03 |
| <b>RP4-738P15.6</b>   | ENSG00000279322 | 1.27 | 1.08 | 1.48 | 3.10E-03 | 2.68E-02 |
| <b>RP11-465B22.3</b>  | ENSG00000217801 | 1.27 | 1.12 | 1.43 | 1.40E-04 | 2.68E-03 |
| <b>AC005785.2</b>     | ENSG00000268189 | 1.27 | 1.14 | 1.41 | 8.20E-06 | 2.75E-04 |
| <b>KNOP1P2</b>        | ENSG00000270429 | 1.27 | 1.09 | 1.47 | 2.10E-03 | 2.02E-02 |
| <b>RP11-479O9.4</b>   | ENSG00000272693 | 1.27 | 1.14 | 1.41 | 1.20E-05 | 3.76E-04 |
| <b>HSPA8P1</b>        | ENSG00000234176 | 1.27 | 1.11 | 1.45 | 6.60E-04 | 8.89E-03 |
| <b>AC008132.14</b>    | ENSG00000239989 | 1.27 | 1.15 | 1.39 | 1.20E-06 | 5.86E-05 |
| <b>CTA-972D3.2</b>    | ENSG00000262171 | 1.27 | 1.11 | 1.44 | 4.80E-04 | 6.90E-03 |
| <b>SAPCD2P3</b>       | ENSG00000232491 | 1.27 | 1.10 | 1.46 | 1.20E-03 | 1.35E-02 |
| <b>MIR155HG</b>       | ENSG00000234883 | 1.27 | 1.15 | 1.39 | 1.10E-06 | 5.53E-05 |
| <b>RP11-108K14.12</b> | ENSG00000278518 | 1.27 | 1.12 | 1.42 | 9.30E-05 | 1.98E-03 |
| <b>RP11-227G15.12</b> | ENSG00000279762 | 1.27 | 1.13 | 1.41 | 3.00E-05 | 7.90E-04 |
| <b>RP11-290F5.1</b>   | ENSG00000249096 | 1.26 | 1.13 | 1.41 | 2.80E-05 | 7.49E-04 |
| <b>RP11-396B14.2</b>  | ENSG00000263033 | 1.26 | 1.14 | 1.40 | 4.80E-06 | 1.77E-04 |
| <b>AC006014.7</b>     | ENSG00000242073 | 1.26 | 1.08 | 1.47 | 2.80E-03 | 2.50E-02 |
| <b>MIR302B</b>        | ENSG00000249532 | 1.26 | 1.11 | 1.44 | 5.70E-04 | 7.91E-03 |
| <b>AOC4P</b>          | ENSG00000260105 | 1.26 | 1.11 | 1.44 | 3.70E-04 | 5.64E-03 |

|                       |                 |      |      |      |          |          |
|-----------------------|-----------------|------|------|------|----------|----------|
| <b>RP13-890H12.2</b>  | ENSG00000267288 | 1.26 | 1.11 | 1.43 | 3.10E-04 | 4.94E-03 |
| <b>CTC-444N24.7</b>   | ENSG00000279541 | 1.26 | 1.10 | 1.46 | 1.20E-03 | 1.35E-02 |
| <b>RP11-886P16.10</b> | ENSG00000279827 | 1.26 | 1.07 | 1.49 | 4.90E-03 | 3.75E-02 |
| <b>CTD-3222D19.4</b>  | ENSG00000279977 | 1.26 | 1.13 | 1.41 | 4.00E-05 | 1.00E-03 |
| <b>RP11-475E11.2</b>  | ENSG00000228076 | 1.26 | 1.07 | 1.50 | 6.80E-03 | 4.73E-02 |
| <b>PITRM1-AS1</b>     | ENSG00000237399 | 1.26 | 1.09 | 1.46 | 1.60E-03 | 1.66E-02 |
| <b>FDX1P1</b>         | ENSG00000181741 | 1.26 | 1.08 | 1.48 | 3.60E-03 | 2.97E-02 |
| <b>RP11-820K3.4</b>   | ENSG00000256159 | 1.26 | 1.10 | 1.45 | 1.10E-03 | 1.27E-02 |
| <b>RP11-124N14.3</b>  | ENSG00000234961 | 1.26 | 1.10 | 1.44 | 7.00E-04 | 9.25E-03 |
| <b>SCARNA7</b>        | ENSG00000238741 | 1.26 | 1.13 | 1.41 | 3.40E-05 | 8.72E-04 |
| <b>RP11-446N19.1</b>  | ENSG00000272369 | 1.26 | 1.14 | 1.39 | 3.00E-06 | 1.21E-04 |
| <b>RP11-697E2.7</b>   | ENSG00000228998 | 1.26 | 1.14 | 1.39 | 3.00E-06 | 1.21E-04 |
| <b>SPATA1</b>         | ENSG00000122432 | 1.26 | 1.10 | 1.44 | 7.80E-04 | 1.01E-02 |
| <b>KB-1592A4.15</b>   | ENSG00000197210 | 1.26 | 1.17 | 1.36 | 5.20E-10 | 1.11E-07 |
| <b>RP11-302B13.1</b>  | ENSG00000239617 | 1.26 | 1.11 | 1.43 | 3.90E-04 | 5.87E-03 |
| <b>RP11-427L15.2</b>  | ENSG00000277687 | 1.26 | 1.11 | 1.43 | 3.40E-04 | 5.30E-03 |
| <b>RP11-626G11.4</b>  | ENSG00000260430 | 1.26 | 1.08 | 1.46 | 2.70E-03 | 2.44E-02 |
| <b>RP11-812I20.2</b>  | ENSG00000216813 | 1.26 | 1.13 | 1.40 | 4.00E-05 | 1.00E-03 |
| <b>CTC-205M6.1</b>    | ENSG00000280161 | 1.26 | 1.13 | 1.40 | 1.90E-05 | 5.54E-04 |
| <b>RP11-567L7.3</b>   | ENSG00000278863 | 1.26 | 1.14 | 1.39 | 3.20E-06 | 1.27E-04 |
| <b>SEC62-AS1</b>      | ENSG00000240373 | 1.26 | 1.09 | 1.45 | 1.80E-03 | 1.81E-02 |
| <b>NONOP2</b>         | ENSG00000237522 | 1.26 | 1.11 | 1.43 | 4.20E-04 | 6.20E-03 |
| <b>AC100830.3</b>     | ENSG00000259635 | 1.26 | 1.10 | 1.44 | 8.80E-04 | 1.11E-02 |
| <b>RP11-977G19.11</b> | ENSG00000257303 | 1.26 | 1.10 | 1.44 | 9.90E-04 | 1.19E-02 |
| <b>RP11-767L7.1</b>   | ENSG00000239835 | 1.26 | 1.08 | 1.46 | 3.00E-03 | 2.62E-02 |
| <b>RP11-281P23.2</b>  | ENSG00000249631 | 1.26 | 1.14 | 1.39 | 4.40E-06 | 1.66E-04 |
| <b>LINC01068</b>      | ENSG00000227676 | 1.26 | 1.13 | 1.40 | 4.20E-05 | 1.04E-03 |
| <b>RP11-20I20.1</b>   | ENSG00000251639 | 1.26 | 1.12 | 1.40 | 5.70E-05 | 1.33E-03 |
| <b>CTB-193M12.1</b>   | ENSG00000257769 | 1.26 | 1.07 | 1.47 | 4.90E-03 | 3.75E-02 |

|                      |                 |      |      |      |          |          |
|----------------------|-----------------|------|------|------|----------|----------|
| <b>RP11-326K13.5</b> | ENSG00000274275 | 1.26 | 1.11 | 1.43 | 4.10E-04 | 6.10E-03 |
| <b>RP11-296A18.6</b> | ENSG00000236434 | 1.26 | 1.11 | 1.42 | 2.80E-04 | 4.55E-03 |
| <b>MTND5P33</b>      | ENSG00000261904 | 1.26 | 1.09 | 1.45 | 1.50E-03 | 1.60E-02 |
| <b>RP11-93B14.6</b>  | ENSG00000167046 | 1.26 | 1.11 | 1.43 | 4.50E-04 | 6.56E-03 |
| <b>RP11-332M2.1</b>  | ENSG00000203644 | 1.26 | 1.11 | 1.42 | 2.30E-04 | 3.92E-03 |
| <b>CTD-2591A1.1</b>  | ENSG00000280159 | 1.26 | 1.12 | 1.41 | 8.90E-05 | 1.90E-03 |
| <b>RP11-124N2.1</b>  | ENSG00000250012 | 1.25 | 1.10 | 1.44 | 9.80E-04 | 1.19E-02 |
| <b>RP11-190A12.9</b> | ENSG00000279430 | 1.25 | 1.14 | 1.38 | 1.30E-06 | 6.20E-05 |
| <b>TTC41P</b>        | ENSG00000214198 | 1.25 | 1.15 | 1.37 | 1.00E-06 | 5.15E-05 |
| <b>RP4-622L5.2</b>   | ENSG00000250135 | 1.25 | 1.11 | 1.42 | 2.70E-04 | 4.42E-03 |
| <b>KRT18P25</b>      | ENSG00000249064 | 1.25 | 1.11 | 1.41 | 1.80E-04 | 3.24E-03 |
| <b>RPL17P46</b>      | ENSG00000239689 | 1.25 | 1.13 | 1.39 | 1.70E-05 | 5.03E-04 |
| <b>CTD-2227E11.1</b> | ENSG00000270933 | 1.25 | 1.13 | 1.40 | 3.90E-05 | 9.85E-04 |
| <b>RP11-73E17.2</b>  | ENSG00000258738 | 1.25 | 1.14 | 1.37 | 1.50E-06 | 6.88E-05 |
| <b>LINC01033</b>     | ENSG00000249069 | 1.25 | 1.15 | 1.37 | 9.60E-07 | 5.02E-05 |
| <b>RP11-197P3.5</b>  | ENSG00000229587 | 1.25 | 1.10 | 1.43 | 6.10E-04 | 8.37E-03 |
| <b>C6orf99</b>       | ENSG00000203711 | 1.25 | 1.09 | 1.44 | 1.10E-03 | 1.27E-02 |
| <b>RP11-350N15.4</b> | ENSG00000255201 | 1.25 | 1.14 | 1.38 | 6.50E-06 | 2.24E-04 |
| <b>CCDC162P</b>      | ENSG00000203799 | 1.25 | 1.09 | 1.44 | 1.40E-03 | 1.51E-02 |
| <b>RP11-77K12.3</b>  | ENSG00000261476 | 1.25 | 1.09 | 1.44 | 1.30E-03 | 1.43E-02 |
| <b>RP5-1063M23.2</b> | ENSG00000236908 | 1.25 | 1.07 | 1.46 | 4.00E-03 | 3.22E-02 |
| <b>HAR1A</b>         | ENSG00000225978 | 1.25 | 1.15 | 1.37 | 3.80E-07 | 2.37E-05 |
| <b>JMJD1C-AS1</b>    | ENSG00000272767 | 1.25 | 1.07 | 1.47 | 5.20E-03 | 3.91E-02 |
| <b>LINC01422</b>     | ENSG00000223704 | 1.25 | 1.09 | 1.45 | 2.00E-03 | 1.95E-02 |
| <b>YBX2P1</b>        | ENSG00000213438 | 1.25 | 1.12 | 1.41 | 1.50E-04 | 2.82E-03 |
| <b>ATP1B1P1</b>      | ENSG00000249212 | 1.25 | 1.11 | 1.42 | 3.00E-04 | 4.83E-03 |
| <b>PPP1R14BP3</b>    | ENSG00000179967 | 1.25 | 1.09 | 1.44 | 1.60E-03 | 1.66E-02 |
| <b>LINC00467</b>     | ENSG00000153363 | 1.25 | 1.09 | 1.44 | 1.70E-03 | 1.74E-02 |
| <b>CTA-246H3.11</b>  | ENSG00000231466 | 1.25 | 1.07 | 1.46 | 4.80E-03 | 3.69E-02 |

|                        |                 |      |      |      |          |          |
|------------------------|-----------------|------|------|------|----------|----------|
| <b>RP11-1348G14.8</b>  | ENSG00000275807 | 1.25 | 1.08 | 1.45 | 3.00E-03 | 2.62E-02 |
| <b>PDCD4-AS1</b>       | ENSG00000203497 | 1.25 | 1.08 | 1.45 | 3.10E-03 | 2.68E-02 |
| <b>RPL17P40</b>        | ENSG00000241067 | 1.25 | 1.13 | 1.39 | 1.80E-05 | 5.29E-04 |
| <b>RP5-1000K24.2</b>   | ENSG00000248503 | 1.25 | 1.09 | 1.43 | 1.10E-03 | 1.27E-02 |
| <b>CTD-3076O17.1</b>   | ENSG00000254744 | 1.25 | 1.11 | 1.41 | 1.50E-04 | 2.82E-03 |
| <b>RP11-91I20.4</b>    | ENSG00000255321 | 1.25 | 1.11 | 1.41 | 1.80E-04 | 3.24E-03 |
| <b>RP11-485M7.2</b>    | ENSG00000279691 | 1.25 | 1.07 | 1.46 | 4.50E-03 | 3.52E-02 |
| <b>XXbac-B135H6.15</b> | ENSG00000237476 | 1.25 | 1.10 | 1.42 | 5.20E-04 | 7.38E-03 |
| <b>CNN2P9</b>          | ENSG00000213149 | 1.25 | 1.09 | 1.44 | 1.90E-03 | 1.88E-02 |
| <b>RP11-352G9.1</b>    | ENSG00000273009 | 1.25 | 1.08 | 1.45 | 3.20E-03 | 2.75E-02 |
| <b>RP11-779O18.2</b>   | ENSG00000213386 | 1.25 | 1.12 | 1.39 | 4.70E-05 | 1.13E-03 |
| <b>NA</b>              | ENSG00000280413 | 1.25 | 1.07 | 1.46 | 4.00E-03 | 3.22E-02 |
| <b>CTC-506B8.1</b>     | ENSG00000249180 | 1.25 | 1.10 | 1.42 | 7.40E-04 | 9.65E-03 |
| <b>AC073842.19</b>     | ENSG00000235077 | 1.25 | 1.11 | 1.41 | 2.60E-04 | 4.33E-03 |
| <b>CTD-2647L4.5</b>    | ENSG00000259607 | 1.25 | 1.09 | 1.43 | 1.40E-03 | 1.51E-02 |
| <b>SLC9A9-AS2</b>      | ENSG00000244493 | 1.25 | 1.08 | 1.45 | 2.70E-03 | 2.44E-02 |
| <b>SNRPGP2</b>         | ENSG00000264350 | 1.25 | 1.14 | 1.36 | 6.40E-07 | 3.50E-05 |
| <b>RPL7P19</b>         | ENSG00000241458 | 1.25 | 1.15 | 1.36 | 8.80E-08 | 7.77E-06 |
| <b>BTF3L4P2</b>        | ENSG00000213189 | 1.25 | 1.11 | 1.40 | 1.90E-04 | 3.38E-03 |
| <b>NUDT4P1</b>         | ENSG00000177144 | 1.25 | 1.09 | 1.43 | 1.20E-03 | 1.35E-02 |
| <b>NUDT4P2</b>         | ENSG00000271121 | 1.25 | 1.09 | 1.43 | 1.20E-03 | 1.35E-02 |
| <b>KIF9-AS1</b>        | ENSG00000227398 | 1.25 | 1.13 | 1.38 | 2.10E-05 | 5.94E-04 |
| <b>LINC01484</b>       | ENSG00000253686 | 1.25 | 1.10 | 1.41 | 4.00E-04 | 5.97E-03 |
| <b>RP11-85E16.1</b>    | ENSG00000272984 | 1.25 | 1.13 | 1.38 | 8.90E-06 | 2.94E-04 |
| <b>RP11-152P23.2</b>   | ENSG00000260350 | 1.25 | 1.10 | 1.42 | 6.30E-04 | 8.58E-03 |
| <b>RP11-264F23.1</b>   | ENSG00000213970 | 1.25 | 1.09 | 1.43 | 1.00E-03 | 1.19E-02 |
| <b>URAHF</b>           | ENSG00000222019 | 1.25 | 1.10 | 1.42 | 5.10E-04 | 7.26E-03 |
| <b>DDX3P1</b>          | ENSG00000232928 | 1.25 | 1.11 | 1.41 | 3.50E-04 | 5.42E-03 |
| <b>RP1-47A17.1</b>     | ENSG00000274717 | 1.25 | 1.16 | 1.34 | 2.10E-09 | 3.68E-07 |

|                      |                 |      |      |      |          |          |
|----------------------|-----------------|------|------|------|----------|----------|
| <b>RP4-647C14.2</b>  | ENSG00000258376 | 1.25 | 1.10 | 1.41 | 5.10E-04 | 7.26E-03 |
| <b>PDXDC2P</b>       | ENSG00000255185 | 1.25 | 1.10 | 1.41 | 5.30E-04 | 7.49E-03 |
| <b>AC005498.3</b>    | ENSG00000267421 | 1.25 | 1.11 | 1.40 | 2.30E-04 | 3.92E-03 |
| <b>RN7SL809P</b>     | ENSG00000241217 | 1.25 | 1.10 | 1.41 | 3.80E-04 | 5.76E-03 |
| <b>TATDN1P1</b>      | ENSG00000234369 | 1.25 | 1.07 | 1.46 | 6.00E-03 | 4.35E-02 |
| <b>RP11-756J15.2</b> | ENSG00000279275 | 1.25 | 1.11 | 1.41 | 3.20E-04 | 5.07E-03 |
| <b>RP11-430L17.1</b> | ENSG00000226457 | 1.25 | 1.08 | 1.44 | 3.00E-03 | 2.62E-02 |
| <b>MDC1-AS1</b>      | ENSG00000224328 | 1.25 | 1.09 | 1.43 | 1.80E-03 | 1.81E-02 |
| <b>CTB-113P19.4</b>  | ENSG00000260581 | 1.25 | 1.14 | 1.36 | 5.70E-07 | 3.26E-05 |
| <b>AC006942.4</b>    | ENSG00000269194 | 1.25 | 1.10 | 1.41 | 6.00E-04 | 8.28E-03 |
| <b>DUTP1</b>         | ENSG00000229048 | 1.25 | 1.08 | 1.45 | 3.40E-03 | 2.86E-02 |
| <b>AC007679.4</b>    | ENSG00000237041 | 1.25 | 1.08 | 1.43 | 2.00E-03 | 1.95E-02 |
| <b>RBMY2EP</b>       | ENSG00000223637 | 1.25 | 1.13 | 1.38 | 1.10E-05 | 3.50E-04 |
| <b>TSSC1-IT1</b>     | ENSG00000224885 | 1.25 | 1.14 | 1.36 | 1.70E-06 | 7.63E-05 |
| <b>RN7SL846P</b>     | ENSG00000242818 | 1.25 | 1.07 | 1.46 | 6.00E-03 | 4.35E-02 |
| <b>RP11-666F17.1</b> | ENSG00000234428 | 1.25 | 1.11 | 1.40 | 2.10E-04 | 3.66E-03 |
| <b>RP11-46H11.11</b> | ENSG00000278949 | 1.25 | 1.12 | 1.39 | 6.20E-05 | 1.41E-03 |
| <b>RP11-298P3.4</b>  | ENSG00000270008 | 1.25 | 1.16 | 1.34 | 8.80E-10 | 1.73E-07 |
| <b>SNORA14</b>       | ENSG00000251922 | 1.25 | 1.14 | 1.36 | 6.40E-07 | 3.50E-05 |
| <b>NA</b>            | ENSG00000279188 | 1.25 | 1.09 | 1.42 | 9.50E-04 | 1.17E-02 |
| <b>RP11-35O15.2</b>  | ENSG00000278022 | 1.25 | 1.11 | 1.39 | 1.20E-04 | 2.39E-03 |
| <b>FLNB-AS1</b>      | ENSG00000244161 | 1.25 | 1.13 | 1.37 | 5.60E-06 | 2.00E-04 |
| <b>AL133243.4</b>    | ENSG00000279544 | 1.25 | 1.09 | 1.43 | 1.50E-03 | 1.60E-02 |
| <b>RP11-203B9.4</b>  | ENSG00000226803 | 1.25 | 1.09 | 1.42 | 1.20E-03 | 1.35E-02 |
| <b>RP5-1181K21.4</b> | ENSG00000279960 | 1.25 | 1.14 | 1.36 | 1.60E-06 | 7.24E-05 |
| <b>RP11-769O8.3</b>  | ENSG00000264635 | 1.25 | 1.11 | 1.39 | 1.20E-04 | 2.39E-03 |
| <b>RP11-793A3.2</b>  | ENSG00000266846 | 1.25 | 1.09 | 1.42 | 1.00E-03 | 1.19E-02 |
| <b>RP11-405L18.4</b> | ENSG00000230188 | 1.25 | 1.10 | 1.41 | 7.00E-04 | 9.25E-03 |
| <b>AL133243.2</b>    | ENSG00000276517 | 1.25 | 1.07 | 1.45 | 5.00E-03 | 3.80E-02 |

|                      |                 |      |      |      |          |          |
|----------------------|-----------------|------|------|------|----------|----------|
| <b>RP11-407N17.5</b> | ENSG00000258940 | 1.25 | 1.07 | 1.46 | 5.80E-03 | 4.24E-02 |
| <b>RP11-21M24.3</b>  | ENSG00000260635 | 1.25 | 1.08 | 1.44 | 2.80E-03 | 2.50E-02 |
| <b>RP11-247L20.3</b> | ENSG00000258857 | 1.24 | 1.12 | 1.38 | 3.20E-05 | 8.34E-04 |
| <b>ERICH6-AS1</b>    | ENSG00000240137 | 1.24 | 1.10 | 1.41 | 7.00E-04 | 9.25E-03 |
| <b>MTCYBP3</b>       | ENSG00000232373 | 1.24 | 1.08 | 1.43 | 2.00E-03 | 1.95E-02 |
| <b>RP11-480I12.5</b> | ENSG00000214796 | 1.24 | 1.09 | 1.42 | 1.40E-03 | 1.51E-02 |
| <b>RP11-490H24.5</b> | ENSG00000216285 | 1.24 | 1.12 | 1.39 | 8.90E-05 | 1.90E-03 |
| <b>UNC93B2</b>       | ENSG00000155070 | 1.24 | 1.11 | 1.39 | 1.10E-04 | 2.24E-03 |
| <b>RP11-428K3.1</b>  | ENSG00000273062 | 1.24 | 1.08 | 1.43 | 2.10E-03 | 2.02E-02 |
| <b>BACH1-IT2</b>     | ENSG00000228817 | 1.24 | 1.10 | 1.41 | 6.90E-04 | 9.18E-03 |
| <b>HMG1P8</b>        | ENSG00000241120 | 1.24 | 1.08 | 1.43 | 1.80E-03 | 1.81E-02 |
| <b>LINC00987</b>     | ENSG00000237248 | 1.24 | 1.11 | 1.39 | 1.50E-04 | 2.82E-03 |
| <b>CTA-212A2.1</b>   | ENSG00000279805 | 1.24 | 1.10 | 1.40 | 4.00E-04 | 5.97E-03 |
| <b>OSTCP8</b>        | ENSG00000226801 | 1.24 | 1.16 | 1.34 | 6.00E-09 | 8.37E-07 |
| <b>RP11-379F4.7</b>  | ENSG00000272087 | 1.24 | 1.12 | 1.39 | 8.90E-05 | 1.90E-03 |
| <b>RP11-225B17.2</b> | ENSG00000273014 | 1.24 | 1.12 | 1.38 | 4.10E-05 | 1.02E-03 |
| <b>AC002116.8</b>    | ENSG00000248101 | 1.24 | 1.06 | 1.46 | 6.80E-03 | 4.73E-02 |
| <b>RPSAP36</b>       | ENSG00000243175 | 1.24 | 1.12 | 1.37 | 2.10E-05 | 5.94E-04 |
| <b>RP3-430N8.11</b>  | ENSG00000269987 | 1.24 | 1.12 | 1.37 | 2.20E-05 | 6.14E-04 |
| <b>CTC-507E2.2</b>   | ENSG00000267592 | 1.24 | 1.10 | 1.41 | 5.60E-04 | 7.81E-03 |
| <b>CTD-2373J6.2</b>  | ENSG00000255647 | 1.24 | 1.09 | 1.42 | 1.30E-03 | 1.43E-02 |
| <b>CTD-2231E14.2</b> | ENSG00000279198 | 1.24 | 1.14 | 1.36 | 1.10E-06 | 5.53E-05 |
| <b>RP11-324I22.3</b> | ENSG00000269952 | 1.24 | 1.14 | 1.36 | 1.40E-06 | 6.58E-05 |
| <b>GS1-393G12.14</b> | ENSG00000272115 | 1.24 | 1.07 | 1.44 | 3.60E-03 | 2.97E-02 |
| <b>EEF1B2P1</b>      | ENSG00000231169 | 1.24 | 1.11 | 1.39 | 1.70E-04 | 3.10E-03 |
| <b>RPL13AP6</b>      | ENSG00000234118 | 1.24 | 1.10 | 1.41 | 6.30E-04 | 8.58E-03 |
| <b>RP11-464D20.6</b> | ENSG00000264546 | 1.24 | 1.07 | 1.44 | 3.70E-03 | 3.03E-02 |
| <b>RP11-290F5.2</b>  | ENSG00000180712 | 1.24 | 1.09 | 1.41 | 1.10E-03 | 1.27E-02 |
| <b>AC005037.3</b>    | ENSG00000183308 | 1.24 | 1.07 | 1.44 | 5.00E-03 | 3.80E-02 |

|                      |                 |      |      |      |          |          |
|----------------------|-----------------|------|------|------|----------|----------|
| <b>ESRRAP1</b>       | ENSG00000215572 | 1.24 | 1.07 | 1.45 | 5.50E-03 | 4.07E-02 |
| <b>MIR92B</b>        | ENSG00000231064 | 1.24 | 1.17 | 1.32 | 1.80E-11 | 7.30E-09 |
| <b>NA</b>            | ENSG00000279978 | 1.24 | 1.08 | 1.43 | 2.60E-03 | 2.38E-02 |
| <b>RP11-138I1.4</b>  | ENSG00000265401 | 1.24 | 1.09 | 1.41 | 7.70E-04 | 9.96E-03 |
| <b>AGAP2-AS1</b>     | ENSG00000255737 | 1.24 | 1.10 | 1.39 | 2.90E-04 | 4.71E-03 |
| <b>OR7M1P</b>        | ENSG00000273336 | 1.24 | 1.06 | 1.45 | 6.70E-03 | 4.70E-02 |
| <b>RP11-815J4.7</b>  | ENSG00000267533 | 1.24 | 1.10 | 1.40 | 6.30E-04 | 8.58E-03 |
| <b>CYP21A1P</b>      | ENSG00000204338 | 1.24 | 1.08 | 1.43 | 2.70E-03 | 2.44E-02 |
| <b>RP11-598F7.3</b>  | ENSG00000256948 | 1.24 | 1.16 | 1.33 | 2.00E-10 | 4.64E-08 |
| <b>RP11-778J15.1</b> | ENSG00000250062 | 1.24 | 1.13 | 1.36 | 5.60E-06 | 2.00E-04 |
| <b>CTD-2024I7.13</b> | ENSG00000246422 | 1.24 | 1.09 | 1.41 | 1.10E-03 | 1.27E-02 |
| <b>LINC00271</b>     | ENSG00000231028 | 1.24 | 1.12 | 1.38 | 5.60E-05 | 1.31E-03 |
| <b>RP11-63M22.1</b>  | ENSG00000260558 | 1.24 | 1.06 | 1.45 | 7.30E-03 | 4.98E-02 |
| <b>NPM1P18</b>       | ENSG00000225739 | 1.24 | 1.12 | 1.37 | 3.30E-05 | 8.50E-04 |
| <b>RP1-86C11.7</b>   | ENSG00000272468 | 1.24 | 1.11 | 1.39 | 1.60E-04 | 2.97E-03 |
| <b>TVP23CP1</b>      | ENSG00000223584 | 1.24 | 1.12 | 1.37 | 3.00E-05 | 7.90E-04 |
| <b>HMGB1P7</b>       | ENSG00000231148 | 1.24 | 1.12 | 1.38 | 5.90E-05 | 1.36E-03 |
| <b>RP1-102G20.2</b>  | ENSG00000237249 | 1.24 | 1.10 | 1.39 | 3.30E-04 | 5.18E-03 |
| <b>RP6-99M1.3</b>    | ENSG00000269902 | 1.24 | 1.07 | 1.43 | 3.70E-03 | 3.03E-02 |
| <b>H2AFZP3</b>       | ENSG00000218502 | 1.24 | 1.10 | 1.40 | 5.60E-04 | 7.81E-03 |
| <b>RP11-626G11.6</b> | ENSG00000278389 | 1.24 | 1.11 | 1.38 | 1.20E-04 | 2.39E-03 |
| <b>RP11-142L4.3</b>  | ENSG00000226723 | 1.24 | 1.09 | 1.40 | 8.10E-04 | 1.04E-02 |
| <b>SETP5</b>         | ENSG00000233998 | 1.24 | 1.06 | 1.45 | 7.20E-03 | 4.94E-02 |
| <b>NME2P1</b>        | ENSG00000123009 | 1.24 | 1.09 | 1.40 | 8.00E-04 | 1.03E-02 |
| <b>KRR1P1</b>        | ENSG00000237672 | 1.24 | 1.07 | 1.44 | 5.10E-03 | 3.86E-02 |
| <b>AC083843.1</b>    | ENSG00000259820 | 1.24 | 1.08 | 1.42 | 2.20E-03 | 2.11E-02 |
| <b>LINC00158</b>     | ENSG00000185433 | 1.24 | 1.10 | 1.40 | 5.70E-04 | 7.91E-03 |
| <b>RP11-1090M7.3</b> | ENSG00000280168 | 1.24 | 1.08 | 1.41 | 1.70E-03 | 1.74E-02 |
| <b>RP11-409I10.2</b> | ENSG00000259039 | 1.24 | 1.09 | 1.40 | 9.00E-04 | 1.12E-02 |

|                       |                 |      |      |      |          |          |
|-----------------------|-----------------|------|------|------|----------|----------|
| <b>QRSL1P3</b>        | ENSG00000257957 | 1.24 | 1.08 | 1.42 | 2.10E-03 | 2.02E-02 |
| <b>RP11-476C8.2</b>   | ENSG00000248196 | 1.24 | 1.06 | 1.44 | 6.60E-03 | 4.66E-02 |
| <b>RP11-264L1.1</b>   | ENSG00000279887 | 1.24 | 1.07 | 1.42 | 3.00E-03 | 2.62E-02 |
| <b>MYLK-AS2</b>       | ENSG00000250174 | 1.24 | 1.08 | 1.42 | 2.00E-03 | 1.95E-02 |
| <b>C2orf48</b>        | ENSG00000163009 | 1.24 | 1.09 | 1.41 | 1.20E-03 | 1.35E-02 |
| <b>AC009506.1</b>     | ENSG00000224152 | 1.24 | 1.07 | 1.43 | 4.90E-03 | 3.75E-02 |
| <b>CTD-2357A8.2</b>   | ENSG00000279570 | 1.24 | 1.07 | 1.43 | 3.40E-03 | 2.86E-02 |
| <b>RP11-391L3.3</b>   | ENSG00000279476 | 1.24 | 1.07 | 1.42 | 3.30E-03 | 2.81E-02 |
| <b>RP11-798K23.5</b>  | ENSG00000253520 | 1.24 | 1.09 | 1.40 | 8.60E-04 | 1.09E-02 |
| <b>PRELID1P1</b>      | ENSG00000217325 | 1.24 | 1.08 | 1.41 | 1.70E-03 | 1.74E-02 |
| <b>TLE1P1</b>         | ENSG00000228158 | 1.24 | 1.07 | 1.42 | 3.40E-03 | 2.86E-02 |
| <b>RP11-1174L13.2</b> | ENSG00000253536 | 1.24 | 1.12 | 1.36 | 1.80E-05 | 5.29E-04 |
| <b>CTB-111H14.1</b>   | ENSG00000243797 | 1.24 | 1.09 | 1.40 | 1.10E-03 | 1.27E-02 |
| <b>CYP2D7</b>         | ENSG00000205702 | 1.24 | 1.06 | 1.44 | 6.90E-03 | 4.78E-02 |
| <b>RP11-380M21.3</b>  | ENSG00000279366 | 1.24 | 1.08 | 1.41 | 1.40E-03 | 1.51E-02 |
| <b>SMCR5</b>          | ENSG00000226746 | 1.24 | 1.06 | 1.44 | 5.60E-03 | 4.13E-02 |
| <b>RP5-1165K10.2</b>  | ENSG00000273432 | 1.24 | 1.08 | 1.41 | 1.90E-03 | 1.88E-02 |
| <b>LINC01136</b>      | ENSG00000233791 | 1.24 | 1.14 | 1.34 | 1.70E-07 | 1.32E-05 |
| <b>RP11-87G24.2</b>   | ENSG00000280122 | 1.24 | 1.16 | 1.31 | 2.00E-11 | 7.87E-09 |
| <b>AP001437.1</b>     | ENSG00000273210 | 1.24 | 1.14 | 1.34 | 2.90E-07 | 1.92E-05 |
| <b>RP1-111C20.4</b>   | ENSG00000271913 | 1.24 | 1.09 | 1.40 | 8.30E-04 | 1.06E-02 |
| <b>CDY4P</b>          | ENSG00000228411 | 1.24 | 1.12 | 1.36 | 3.30E-05 | 8.50E-04 |
| <b>PTTG3P</b>         | ENSG00000213005 | 1.23 | 1.08 | 1.41 | 2.00E-03 | 1.95E-02 |
| <b>WI2-1896O14.1</b>  | ENSG00000215861 | 1.23 | 1.09 | 1.40 | 1.30E-03 | 1.43E-02 |
| <b>RP11-303E16.9</b>  | ENSG00000278985 | 1.23 | 1.06 | 1.43 | 5.30E-03 | 3.96E-02 |
| <b>RP11-477I4.4</b>   | ENSG00000279140 | 1.23 | 1.07 | 1.43 | 4.10E-03 | 3.28E-02 |
| <b>RP1-178F15.5</b>   | ENSG00000271853 | 1.23 | 1.10 | 1.39 | 4.60E-04 | 6.67E-03 |
| <b>RP5-1057I20.2</b>  | ENSG00000257488 | 1.23 | 1.10 | 1.39 | 3.60E-04 | 5.54E-03 |
| <b>CTB-52I2.4</b>     | ENSG00000273654 | 1.23 | 1.15 | 1.33 | 2.20E-08 | 2.44E-06 |

|                       |                 |      |      |      |          |          |
|-----------------------|-----------------|------|------|------|----------|----------|
| <b>FAM204CP</b>       | ENSG00000230902 | 1.23 | 1.11 | 1.37 | 1.40E-04 | 2.68E-03 |
| <b>CLSTN2-AS1</b>     | ENSG00000250433 | 1.23 | 1.10 | 1.38 | 3.60E-04 | 5.54E-03 |
| <b>RP11-43D4.2</b>    | ENSG00000258111 | 1.23 | 1.09 | 1.40 | 9.80E-04 | 1.19E-02 |
| <b>RP11-313D6.3</b>   | ENSG00000232470 | 1.23 | 1.08 | 1.41 | 2.40E-03 | 2.26E-02 |
| <b>CTD-2231E14.8</b>  | ENSG00000269243 | 1.23 | 1.07 | 1.43 | 5.00E-03 | 3.80E-02 |
| <b>KB-68A7.1</b>      | ENSG00000274225 | 1.23 | 1.11 | 1.37 | 1.00E-04 | 2.06E-03 |
| <b>RP11-49C9.2</b>    | ENSG00000183171 | 1.23 | 1.11 | 1.37 | 1.30E-04 | 2.53E-03 |
| <b>RP11-48B3.4</b>    | ENSG00000260317 | 1.23 | 1.14 | 1.33 | 2.10E-07 | 1.53E-05 |
| <b>RP11-146E23.2</b>  | ENSG00000253283 | 1.23 | 1.08 | 1.41 | 2.70E-03 | 2.44E-02 |
| <b>CTD-2095E4.4</b>   | ENSG00000280020 | 1.23 | 1.08 | 1.41 | 1.70E-03 | 1.74E-02 |
| <b>RP5-940J5.6</b>    | ENSG00000247853 | 1.23 | 1.06 | 1.43 | 6.10E-03 | 4.41E-02 |
| <b>CHCHD4P5</b>       | ENSG00000225222 | 1.23 | 1.06 | 1.43 | 5.70E-03 | 4.18E-02 |
| <b>AP000692.10</b>    | ENSG00000273199 | 1.23 | 1.07 | 1.42 | 3.40E-03 | 2.86E-02 |
| <b>RP11-686G8.1</b>   | ENSG00000238168 | 1.23 | 1.13 | 1.34 | 1.10E-06 | 5.53E-05 |
| <b>RP11-227D13.1</b>  | ENSG00000259705 | 1.23 | 1.09 | 1.40 | 1.00E-03 | 1.19E-02 |
| <b>RP11-1191J2.2</b>  | ENSG00000242686 | 1.23 | 1.10 | 1.38 | 3.50E-04 | 5.42E-03 |
| <b>OFD1P17</b>        | ENSG00000228212 | 1.23 | 1.08 | 1.40 | 1.70E-03 | 1.74E-02 |
| <b>C4B-AS1</b>        | ENSG00000229776 | 1.23 | 1.09 | 1.39 | 5.50E-04 | 7.70E-03 |
| <b>C4A-AS1</b>        | ENSG00000233627 | 1.23 | 1.09 | 1.39 | 5.50E-04 | 7.70E-03 |
| <b>RP4-646N3.1</b>    | ENSG00000235806 | 1.23 | 1.09 | 1.39 | 6.10E-04 | 8.37E-03 |
| <b>KB-1254G8.1</b>    | ENSG00000253385 | 1.23 | 1.07 | 1.42 | 3.50E-03 | 2.92E-02 |
| <b>RP11-196G18.24</b> | ENSG00000272993 | 1.23 | 1.13 | 1.35 | 5.90E-06 | 2.08E-04 |
| <b>LSM12P1</b>        | ENSG00000232024 | 1.23 | 1.06 | 1.43 | 6.20E-03 | 4.46E-02 |
| <b>AHCYP7</b>         | ENSG00000259465 | 1.23 | 1.11 | 1.37 | 1.00E-04 | 2.06E-03 |
| <b>HNRNPRP1</b>       | ENSG00000223984 | 1.23 | 1.07 | 1.42 | 4.00E-03 | 3.22E-02 |
| <b>CH507-338C24.1</b> | ENSG00000277991 | 1.23 | 1.07 | 1.41 | 3.30E-03 | 2.81E-02 |
| <b>RP11-386G11.10</b> | ENSG00000258017 | 1.23 | 1.12 | 1.36 | 3.00E-05 | 7.90E-04 |
| <b>CTB-31O20.3</b>    | ENSG00000267007 | 1.23 | 1.10 | 1.38 | 3.90E-04 | 5.87E-03 |
| <b>CTD-3030D20.1</b>  | ENSG00000268747 | 1.23 | 1.08 | 1.40 | 1.80E-03 | 1.81E-02 |

|                      |                 |      |      |      |          |          |
|----------------------|-----------------|------|------|------|----------|----------|
| <b>MTND5P12</b>      | ENSG00000251544 | 1.23 | 1.12 | 1.34 | 6.40E-06 | 2.22E-04 |
| <b>RP5-1142A6.2</b>  | ENSG00000224888 | 1.23 | 1.10 | 1.37 | 1.50E-04 | 2.82E-03 |
| <b>Metazoa_SRP</b>   | ENSG00000277794 | 1.23 | 1.10 | 1.37 | 1.70E-04 | 3.10E-03 |
| <b>RP11-21K12.2</b>  | ENSG00000279500 | 1.23 | 1.09 | 1.38 | 6.60E-04 | 8.89E-03 |
| <b>RPL5P24</b>       | ENSG00000244052 | 1.23 | 1.09 | 1.39 | 8.30E-04 | 1.06E-02 |
| <b>RP11-297C4.3</b>  | ENSG00000260487 | 1.23 | 1.10 | 1.37 | 1.70E-04 | 3.10E-03 |
| <b>RP11-416I2.1</b>  | ENSG00000260328 | 1.23 | 1.08 | 1.40 | 2.40E-03 | 2.26E-02 |
| <b>HIST1H2BPS2</b>   | ENSG00000217646 | 1.23 | 1.11 | 1.36 | 8.90E-05 | 1.90E-03 |
| <b>RP11-140H17.2</b> | ENSG00000274093 | 1.23 | 1.06 | 1.42 | 5.50E-03 | 4.07E-02 |
| <b>Metazoa_SRP</b>   | ENSG00000275586 | 1.23 | 1.10 | 1.38 | 4.00E-04 | 5.97E-03 |
| <b>TAGLN2P1</b>      | ENSG00000253676 | 1.23 | 1.09 | 1.39 | 9.70E-04 | 1.19E-02 |
| <b>RAI1-AS1</b>      | ENSG00000237328 | 1.23 | 1.07 | 1.41 | 3.30E-03 | 2.81E-02 |
| <b>RP11-34P13.15</b> | ENSG00000268903 | 1.23 | 1.08 | 1.40 | 1.80E-03 | 1.81E-02 |
| <b>LINC00426</b>     | ENSG00000238121 | 1.23 | 1.08 | 1.40 | 1.80E-03 | 1.81E-02 |
| <b>RP11-307L3.4</b>  | ENSG00000233367 | 1.23 | 1.08 | 1.40 | 1.90E-03 | 1.88E-02 |
| <b>RP11-707G18.1</b> | ENSG00000278743 | 1.23 | 1.12 | 1.35 | 1.60E-05 | 4.76E-04 |
| <b>RP1-40E16.12</b>  | ENSG00000272277 | 1.23 | 1.06 | 1.42 | 6.40E-03 | 4.55E-02 |
| <b>UNC93B6</b>       | ENSG00000255562 | 1.23 | 1.11 | 1.36 | 4.90E-05 | 1.17E-03 |
| <b>RP11-563N4.1</b>  | ENSG00000272716 | 1.23 | 1.07 | 1.41 | 3.40E-03 | 2.86E-02 |
| <b>GAPLINC</b>       | ENSG00000266835 | 1.23 | 1.09 | 1.39 | 9.30E-04 | 1.15E-02 |
| <b>RP11-109G23.3</b> | ENSG00000260278 | 1.23 | 1.08 | 1.39 | 1.60E-03 | 1.66E-02 |
| <b>SRSF10P1</b>      | ENSG00000267717 | 1.23 | 1.08 | 1.40 | 2.20E-03 | 2.11E-02 |
| <b>RP11-471L13.3</b> | ENSG00000263648 | 1.23 | 1.07 | 1.41 | 3.40E-03 | 2.86E-02 |
| <b>PRR34-AS1</b>     | ENSG00000241990 | 1.23 | 1.07 | 1.40 | 2.60E-03 | 2.38E-02 |
| <b>AC008132.15</b>   | ENSG00000182824 | 1.23 | 1.13 | 1.34 | 2.40E-06 | 1.00E-04 |
| <b>RPS3AP43</b>      | ENSG00000242661 | 1.23 | 1.09 | 1.38 | 7.10E-04 | 9.34E-03 |
| <b>RP11-364B14.3</b> | ENSG00000230707 | 1.23 | 1.08 | 1.39 | 1.80E-03 | 1.81E-02 |
| <b>RP11-153M3.1</b>  | ENSG00000257576 | 1.23 | 1.14 | 1.32 | 5.10E-08 | 5.01E-06 |
| <b>RP5-1139B12.4</b> | ENSG00000270110 | 1.23 | 1.09 | 1.38 | 7.30E-04 | 9.55E-03 |

|                      |                 |      |      |      |          |          |
|----------------------|-----------------|------|------|------|----------|----------|
| <b>RP1-117O3.2</b>   | ENSG00000236065 | 1.23 | 1.09 | 1.39 | 1.10E-03 | 1.27E-02 |
| <b>RP11-375N15.2</b> | ENSG00000272267 | 1.23 | 1.07 | 1.40 | 2.60E-03 | 2.38E-02 |
| <b>AC002456.2</b>    | ENSG00000223969 | 1.23 | 1.16 | 1.30 | 1.40E-11 | 6.06E-09 |
| <b>RP11-537E18.1</b> | ENSG00000237916 | 1.23 | 1.11 | 1.36 | 1.10E-04 | 2.24E-03 |
| <b>RP11-272L13.4</b> | ENSG00000270911 | 1.23 | 1.09 | 1.38 | 6.50E-04 | 8.80E-03 |
| <b>RP11-779O18.1</b> | ENSG00000253295 | 1.23 | 1.10 | 1.37 | 2.20E-04 | 3.79E-03 |
| <b>CTD-2184C24.2</b> | ENSG00000254718 | 1.23 | 1.15 | 1.31 | 3.00E-10 | 6.71E-08 |
| <b>RP11-417O11.5</b> | ENSG00000225761 | 1.23 | 1.11 | 1.36 | 9.70E-05 | 2.04E-03 |
| <b>RP11-454H13.1</b> | ENSG00000243396 | 1.23 | 1.12 | 1.35 | 2.10E-05 | 5.94E-04 |
| <b>ARSD-AS1</b>      | ENSG00000229851 | 1.23 | 1.07 | 1.40 | 3.20E-03 | 2.75E-02 |
| <b>RPL7P60</b>       | ENSG00000214142 | 1.23 | 1.12 | 1.34 | 6.20E-06 | 2.17E-04 |
| <b>NEPNP</b>         | ENSG00000218233 | 1.23 | 1.06 | 1.41 | 5.80E-03 | 4.24E-02 |
| <b>RP11-71H17.1</b>  | ENSG00000242199 | 1.22 | 1.07 | 1.41 | 4.00E-03 | 3.22E-02 |
| <b>CH507-513H4.5</b> | ENSG00000281383 | 1.22 | 1.12 | 1.33 | 3.30E-06 | 1.29E-04 |
| <b>SMCR2</b>         | ENSG00000223979 | 1.22 | 1.12 | 1.34 | 1.70E-05 | 5.03E-04 |
| <b>RP11-87G24.6</b>  | ENSG00000267521 | 1.22 | 1.14 | 1.31 | 6.40E-09 | 8.74E-07 |
| <b>RP11-234G16.5</b> | ENSG00000275005 | 1.22 | 1.07 | 1.40 | 3.60E-03 | 2.97E-02 |
| <b>RP11-69H7.2</b>   | ENSG00000260660 | 1.22 | 1.11 | 1.35 | 4.90E-05 | 1.17E-03 |
| <b>PSMA6P1</b>       | ENSG00000215414 | 1.22 | 1.06 | 1.41 | 6.00E-03 | 4.35E-02 |
| <b>RP11-338N10.3</b> | ENSG00000269978 | 1.22 | 1.11 | 1.35 | 3.40E-05 | 8.72E-04 |
| <b>RP11-673E1.1</b>  | ENSG00000251600 | 1.22 | 1.07 | 1.40 | 3.60E-03 | 2.97E-02 |
| <b>RP11-754B17.1</b> | ENSG00000255158 | 1.22 | 1.06 | 1.41 | 5.70E-03 | 4.18E-02 |
| <b>RP4-641G12.3</b>  | ENSG00000238015 | 1.22 | 1.12 | 1.34 | 1.40E-05 | 4.30E-04 |
| <b>CTD-2349P21.3</b> | ENSG00000280069 | 1.22 | 1.08 | 1.38 | 1.20E-03 | 1.35E-02 |
| <b>RP11-506H20.2</b> | ENSG00000271410 | 1.22 | 1.10 | 1.36 | 3.10E-04 | 4.94E-03 |
| <b>RP11-521B24.3</b> | ENSG00000251602 | 1.22 | 1.06 | 1.41 | 6.20E-03 | 4.46E-02 |
| <b>RP11-523O18.7</b> | ENSG00000241577 | 1.22 | 1.12 | 1.33 | 3.80E-06 | 1.47E-04 |
| <b>RP11-131L23.1</b> | ENSG00000223653 | 1.22 | 1.07 | 1.40 | 4.10E-03 | 3.28E-02 |
| <b>LINC00384</b>     | ENSG00000232117 | 1.22 | 1.06 | 1.41 | 5.70E-03 | 4.18E-02 |

|                       |                 |      |      |      |          |          |
|-----------------------|-----------------|------|------|------|----------|----------|
| <b>RP11-56M3.1</b>    | ENSG00000234043 | 1.22 | 1.11 | 1.34 | 4.60E-05 | 1.12E-03 |
| <b>KRT18P57</b>       | ENSG00000215867 | 1.22 | 1.10 | 1.36 | 2.60E-04 | 4.33E-03 |
| <b>RP11-290L1.2</b>   | ENSG00000257839 | 1.22 | 1.09 | 1.36 | 3.30E-04 | 5.18E-03 |
| <b>TECRP1</b>         | ENSG00000235043 | 1.22 | 1.07 | 1.39 | 2.40E-03 | 2.26E-02 |
| <b>AC005822.1</b>     | ENSG00000235554 | 1.22 | 1.12 | 1.33 | 6.20E-06 | 2.17E-04 |
| <b>AC139099.5</b>     | ENSG00000262094 | 1.22 | 1.07 | 1.39 | 2.50E-03 | 2.34E-02 |
| <b>RP13-16H11.5</b>   | ENSG00000235843 | 1.22 | 1.06 | 1.40 | 4.50E-03 | 3.52E-02 |
| <b>RP1-27K12.4</b>    | ENSG00000249379 | 1.22 | 1.06 | 1.41 | 5.60E-03 | 4.13E-02 |
| <b>RPS2P35</b>        | ENSG00000238172 | 1.22 | 1.07 | 1.39 | 2.70E-03 | 2.44E-02 |
| <b>AC008132.13</b>    | ENSG00000161103 | 1.22 | 1.10 | 1.36 | 2.70E-04 | 4.42E-03 |
| <b>AC006427.2</b>     | ENSG00000248851 | 1.22 | 1.10 | 1.35 | 1.40E-04 | 2.68E-03 |
| <b>IGKV1OR1-1</b>     | ENSG00000276674 | 1.22 | 1.09 | 1.37 | 5.30E-04 | 7.49E-03 |
| <b>RP11-709D24.6</b>  | ENSG00000261442 | 1.22 | 1.05 | 1.41 | 7.30E-03 | 4.98E-02 |
| <b>PTPN2P1</b>        | ENSG00000228196 | 1.22 | 1.07 | 1.39 | 3.30E-03 | 2.81E-02 |
| <b>RP3-468O1.6</b>    | ENSG00000277558 | 1.22 | 1.06 | 1.40 | 4.80E-03 | 3.69E-02 |
| <b>Z69890.1</b>       | ENSG00000206168 | 1.22 | 1.06 | 1.41 | 6.70E-03 | 4.70E-02 |
| <b>RP11-769O8.1</b>   | ENSG00000266171 | 1.22 | 1.09 | 1.37 | 7.10E-04 | 9.34E-03 |
| <b>RP5-1042K10.10</b> | ENSG00000229999 | 1.22 | 1.14 | 1.31 | 4.50E-08 | 4.49E-06 |
| <b>RP4-669L17.8</b>   | ENSG00000250575 | 1.22 | 1.07 | 1.39 | 2.90E-03 | 2.56E-02 |
| <b>MIR24-2</b>        | ENSG00000267519 | 1.22 | 1.10 | 1.35 | 9.60E-05 | 2.03E-03 |
| <b>NA</b>             | ENSG00000279866 | 1.22 | 1.06 | 1.40 | 5.00E-03 | 3.80E-02 |
| <b>RP11-488L18.1</b>  | ENSG00000214144 | 1.22 | 1.07 | 1.39 | 2.60E-03 | 2.38E-02 |
| <b>RPL12P29</b>       | ENSG00000233189 | 1.22 | 1.06 | 1.41 | 6.60E-03 | 4.66E-02 |
| <b>TUBBP5</b>         | ENSG00000159247 | 1.22 | 1.12 | 1.33 | 1.10E-05 | 3.50E-04 |
| <b>RP11-774O3.3</b>   | ENSG00000251615 | 1.22 | 1.06 | 1.40 | 5.70E-03 | 4.18E-02 |
| <b>RP11-1070N10.3</b> | ENSG00000258572 | 1.22 | 1.07 | 1.39 | 3.40E-03 | 2.86E-02 |
| <b>MIR17HG</b>        | ENSG00000215417 | 1.22 | 1.13 | 1.31 | 4.10E-07 | 2.55E-05 |
| <b>RP11-10J21.4</b>   | ENSG00000253307 | 1.22 | 1.08 | 1.38 | 1.90E-03 | 1.88E-02 |
| <b>RP11-775J23.2</b>  | ENSG00000243508 | 1.22 | 1.12 | 1.32 | 4.40E-06 | 1.66E-04 |

|                       |                 |      |      |      |          |          |
|-----------------------|-----------------|------|------|------|----------|----------|
| <b>PCAT1</b>          | ENSG00000253438 | 1.22 | 1.11 | 1.34 | 3.90E-05 | 9.85E-04 |
| <b>LINC01422</b>      | ENSG00000235271 | 1.22 | 1.08 | 1.37 | 1.50E-03 | 1.60E-02 |
| <b>RP13-93L13.1</b>   | ENSG00000225460 | 1.22 | 1.05 | 1.40 | 7.10E-03 | 4.89E-02 |
| <b>SEPT14P9</b>       | ENSG00000250210 | 1.22 | 1.07 | 1.38 | 2.10E-03 | 2.02E-02 |
| <b>MESTIT1</b>        | ENSG00000272701 | 1.22 | 1.09 | 1.36 | 4.20E-04 | 6.20E-03 |
| <b>AL133243.3</b>     | ENSG00000274159 | 1.22 | 1.09 | 1.36 | 4.90E-04 | 7.03E-03 |
| <b>PA2G4P2</b>        | ENSG00000235698 | 1.22 | 1.08 | 1.37 | 1.20E-03 | 1.35E-02 |
| <b>RPS17P13</b>       | ENSG00000224706 | 1.22 | 1.09 | 1.36 | 5.50E-04 | 7.70E-03 |
| <b>GS1-184P14.2</b>   | ENSG00000225071 | 1.22 | 1.13 | 1.31 | 2.00E-07 | 1.48E-05 |
| <b>RP11-480I12.10</b> | ENSG00000260021 | 1.22 | 1.07 | 1.39 | 3.50E-03 | 2.92E-02 |
| <b>RP11-2C24.5</b>    | ENSG00000260082 | 1.22 | 1.10 | 1.34 | 6.10E-05 | 1.39E-03 |
| <b>MRPS31P2</b>       | ENSG00000232894 | 1.22 | 1.07 | 1.38 | 2.60E-03 | 2.38E-02 |
| <b>RP1-224A6.3</b>    | ENSG00000228397 | 1.21 | 1.07 | 1.38 | 3.30E-03 | 2.81E-02 |
| <b>RP11-946P6.6</b>   | ENSG00000277595 | 1.21 | 1.07 | 1.38 | 3.60E-03 | 2.97E-02 |
| <b>RP11-113D19.9</b>  | ENSG00000275980 | 1.21 | 1.09 | 1.36 | 6.80E-04 | 9.08E-03 |
| <b>DLEU2_6</b>        | ENSG00000275559 | 1.21 | 1.08 | 1.37 | 1.60E-03 | 1.66E-02 |
| <b>RP11-727F15.13</b> | ENSG00000269463 | 1.21 | 1.05 | 1.40 | 7.10E-03 | 4.89E-02 |
| <b>PAICSP4</b>        | ENSG00000254244 | 1.21 | 1.08 | 1.36 | 1.10E-03 | 1.27E-02 |
| <b>RP11-1070N10.7</b> | ENSG00000270038 | 1.21 | 1.06 | 1.40 | 6.40E-03 | 4.55E-02 |
| <b>RP11-303E16.2</b>  | ENSG00000261061 | 1.21 | 1.06 | 1.39 | 5.70E-03 | 4.18E-02 |
| <b>AF186192.6</b>     | ENSG00000263612 | 1.21 | 1.12 | 1.31 | 1.10E-06 | 5.53E-05 |
| <b>RP13-270P17.1</b>  | ENSG00000264235 | 1.21 | 1.08 | 1.36 | 7.70E-04 | 9.96E-03 |
| <b>AP004290.1</b>     | ENSG00000236583 | 1.21 | 1.08 | 1.36 | 1.20E-03 | 1.35E-02 |
| <b>RN7SL390P</b>      | ENSG00000241785 | 1.21 | 1.08 | 1.37 | 1.40E-03 | 1.51E-02 |
| <b>KARSP2</b>         | ENSG00000230371 | 1.21 | 1.12 | 1.32 | 5.60E-06 | 2.00E-04 |
| <b>CH507-254M2.2</b>  | ENSG00000276077 | 1.21 | 1.09 | 1.35 | 4.40E-04 | 6.44E-03 |
| <b>RP11-583F2.5</b>   | ENSG00000266598 | 1.21 | 1.06 | 1.38 | 3.70E-03 | 3.03E-02 |
| <b>RP11-554A11.9</b>  | ENSG00000259799 | 1.21 | 1.08 | 1.36 | 9.80E-04 | 1.19E-02 |
| <b>CTD-2270L9.4</b>   | ENSG00000260136 | 1.21 | 1.08 | 1.36 | 1.20E-03 | 1.35E-02 |

|                      |                 |      |      |      |          |          |
|----------------------|-----------------|------|------|------|----------|----------|
| <b>RP11-113C12.4</b> | ENSG00000256552 | 1.21 | 1.09 | 1.34 | 2.40E-04 | 4.05E-03 |
| <b>RPL26P35</b>      | ENSG00000244229 | 1.21 | 1.10 | 1.34 | 1.70E-04 | 3.10E-03 |
| <b>RP11-75C10.6</b>  | ENSG00000279801 | 1.21 | 1.06 | 1.39 | 5.90E-03 | 4.30E-02 |
| <b>RP11-419L20.2</b> | ENSG00000254185 | 1.21 | 1.07 | 1.38 | 3.20E-03 | 2.75E-02 |
| <b>RP11-48B3.3</b>   | ENSG00000254162 | 1.21 | 1.13 | 1.30 | 1.10E-07 | 9.27E-06 |
| <b>GAS8-AS1</b>      | ENSG00000221819 | 1.21 | 1.08 | 1.36 | 1.50E-03 | 1.60E-02 |
| <b>AGGF1P1</b>       | ENSG00000214273 | 1.21 | 1.07 | 1.38 | 3.00E-03 | 2.62E-02 |
| <b>RPS2P41</b>       | ENSG00000244060 | 1.21 | 1.11 | 1.32 | 1.10E-05 | 3.50E-04 |
| <b>RP11-99A14.1</b>  | ENSG00000253273 | 1.21 | 1.06 | 1.38 | 3.90E-03 | 3.16E-02 |
| <b>RP13-452N2.1</b>  | ENSG00000242048 | 1.21 | 1.10 | 1.34 | 1.40E-04 | 2.68E-03 |
| <b>HCG17</b>         | ENSG00000270604 | 1.21 | 1.12 | 1.32 | 5.40E-06 | 1.95E-04 |
| <b>RP11-138A9.1</b>  | ENSG00000271204 | 1.21 | 1.07 | 1.37 | 2.60E-03 | 2.38E-02 |
| <b>CTA-246H3.12</b>  | ENSG00000272942 | 1.21 | 1.12 | 1.30 | 5.00E-07 | 2.94E-05 |
| <b>RP11-40E6.2</b>   | ENSG00000275248 | 1.21 | 1.09 | 1.34 | 3.30E-04 | 5.18E-03 |
| <b>RP5-1050D4.3</b>  | ENSG00000262429 | 1.21 | 1.09 | 1.35 | 4.20E-04 | 6.20E-03 |
| <b>AC011406.2</b>    | ENSG00000248696 | 1.21 | 1.08 | 1.36 | 1.00E-03 | 1.19E-02 |
| <b>RN7SL395P</b>     | ENSG00000244307 | 1.21 | 1.10 | 1.34 | 1.30E-04 | 2.53E-03 |
| <b>RP11-191L17.1</b> | ENSG00000272663 | 1.21 | 1.06 | 1.38 | 3.60E-03 | 2.97E-02 |
| <b>RP11-380L11.4</b> | ENSG00000270028 | 1.21 | 1.07 | 1.36 | 1.70E-03 | 1.74E-02 |
| <b>DPYD-AS1</b>      | ENSG00000232878 | 1.21 | 1.08 | 1.36 | 1.00E-03 | 1.19E-02 |
| <b>CTC-421K24.1</b>  | ENSG00000275839 | 1.21 | 1.05 | 1.39 | 7.30E-03 | 4.98E-02 |
| <b>CTC-463A16.1</b>  | ENSG00000280047 | 1.21 | 1.08 | 1.35 | 7.90E-04 | 1.02E-02 |
| <b>GGT3P</b>         | ENSG00000197421 | 1.21 | 1.12 | 1.31 | 1.50E-06 | 6.88E-05 |
| <b>MGC45922</b>      | ENSG00000180279 | 1.21 | 1.06 | 1.38 | 3.60E-03 | 2.97E-02 |
| <b>IQSEC3P1</b>      | ENSG00000256902 | 1.21 | 1.06 | 1.38 | 4.90E-03 | 3.75E-02 |
| <b>RP11-247I13.3</b> | ENSG00000214093 | 1.21 | 1.07 | 1.36 | 1.90E-03 | 1.88E-02 |
| <b>RPS7P4</b>        | ENSG00000229133 | 1.21 | 1.07 | 1.36 | 1.60E-03 | 1.66E-02 |
| <b>SMPD5</b>         | ENSG00000204791 | 1.21 | 1.12 | 1.30 | 3.50E-07 | 2.24E-05 |
| <b>RP11-474P2.2</b>  | ENSG00000258096 | 1.21 | 1.06 | 1.38 | 5.00E-03 | 3.80E-02 |

|                       |                 |      |      |      |          |          |
|-----------------------|-----------------|------|------|------|----------|----------|
| <b>RP5-827C21.1</b>   | ENSG00000235605 | 1.21 | 1.12 | 1.30 | 5.10E-07 | 2.98E-05 |
| <b>AP001610.5</b>     | ENSG00000228318 | 1.21 | 1.11 | 1.31 | 5.10E-06 | 1.86E-04 |
| <b>RP11-282I1.1</b>   | ENSG00000230131 | 1.21 | 1.05 | 1.39 | 7.30E-03 | 4.98E-02 |
| <b>RUNDC3A-AS1</b>    | ENSG00000267750 | 1.21 | 1.12 | 1.31 | 1.50E-06 | 6.88E-05 |
| <b>RP11-58H15.3</b>   | ENSG00000250540 | 1.21 | 1.08 | 1.35 | 1.10E-03 | 1.27E-02 |
| <b>RP11-274B18.4</b>  | ENSG00000226337 | 1.21 | 1.06 | 1.37 | 3.70E-03 | 3.03E-02 |
| <b>RP11-463J10.4</b>  | ENSG00000258854 | 1.21 | 1.07 | 1.36 | 2.20E-03 | 2.11E-02 |
| <b>RP11-354E23.3</b>  | ENSG00000280166 | 1.21 | 1.07 | 1.36 | 2.20E-03 | 2.11E-02 |
| <b>RP11-109P14.8</b>  | ENSG00000235673 | 1.21 | 1.08 | 1.35 | 1.20E-03 | 1.35E-02 |
| <b>PCDH9-AS3</b>      | ENSG00000225263 | 1.21 | 1.06 | 1.38 | 5.80E-03 | 4.24E-02 |
| <b>RP11-54O7.18</b>   | ENSG00000273443 | 1.21 | 1.08 | 1.36 | 1.30E-03 | 1.43E-02 |
| <b>RP11-687E1.2</b>   | ENSG00000276174 | 1.21 | 1.07 | 1.37 | 2.70E-03 | 2.44E-02 |
| <b>EFCAB14-AS1</b>    | ENSG00000228237 | 1.21 | 1.06 | 1.38 | 5.30E-03 | 3.96E-02 |
| <b>AP001631.10</b>    | ENSG00000228120 | 1.21 | 1.07 | 1.37 | 2.90E-03 | 2.56E-02 |
| <b>CH507-152C13.6</b> | ENSG00000278927 | 1.21 | 1.07 | 1.37 | 2.90E-03 | 2.56E-02 |
| <b>RP11-127L20.3</b>  | ENSG00000228261 | 1.21 | 1.06 | 1.38 | 5.50E-03 | 4.07E-02 |
| <b>RP11-61L19.3</b>   | ENSG00000273352 | 1.21 | 1.07 | 1.36 | 2.00E-03 | 1.95E-02 |
| <b>HAR1B</b>          | ENSG00000231133 | 1.21 | 1.10 | 1.33 | 1.30E-04 | 2.53E-03 |
| <b>RP11-388B24.4</b>  | ENSG00000235377 | 1.21 | 1.13 | 1.29 | 1.70E-08 | 1.94E-06 |
| <b>RP11-377G16.2</b>  | ENSG00000248719 | 1.21 | 1.10 | 1.33 | 1.50E-04 | 2.82E-03 |
| <b>RN7SL344P</b>      | ENSG00000241395 | 1.21 | 1.06 | 1.38 | 5.20E-03 | 3.91E-02 |
| <b>AC074183.3</b>     | ENSG00000280325 | 1.21 | 1.10 | 1.33 | 1.20E-04 | 2.39E-03 |
| <b>RP11-231I16.1</b>  | ENSG00000257279 | 1.21 | 1.09 | 1.34 | 3.50E-04 | 5.42E-03 |
| <b>RP11-15M15.1</b>   | ENSG00000223492 | 1.21 | 1.06 | 1.37 | 4.50E-03 | 3.52E-02 |
| <b>LINC00152</b>      | ENSG00000222041 | 1.21 | 1.07 | 1.36 | 2.10E-03 | 2.02E-02 |
| <b>VN1R80P</b>        | ENSG00000268598 | 1.21 | 1.08 | 1.35 | 1.30E-03 | 1.43E-02 |
| <b>LOH12CR2</b>       | ENSG00000205791 | 1.21 | 1.09 | 1.33 | 2.50E-04 | 4.18E-03 |
| <b>RP11-282O18.3</b>  | ENSG00000235423 | 1.21 | 1.06 | 1.37 | 5.30E-03 | 3.96E-02 |
| <b>RP11-640N11.2</b>  | ENSG00000250493 | 1.21 | 1.09 | 1.33 | 2.30E-04 | 3.92E-03 |

|                      |                 |      |      |      |          |          |
|----------------------|-----------------|------|------|------|----------|----------|
| <b>NA</b>            | ENSG00000279424 | 1.21 | 1.05 | 1.38 | 6.90E-03 | 4.78E-02 |
| <b>RP11-397P13.6</b> | ENSG00000227417 | 1.21 | 1.10 | 1.33 | 1.30E-04 | 2.53E-03 |
| <b>IGLC5</b>         | ENSG00000254030 | 1.21 | 1.07 | 1.36 | 3.00E-03 | 2.62E-02 |
| <b>RP11-759F5.1</b>  | ENSG00000236327 | 1.21 | 1.11 | 1.30 | 2.70E-06 | 1.11E-04 |
| <b>RP11-53I6.2</b>   | ENSG00000263917 | 1.20 | 1.08 | 1.35 | 1.30E-03 | 1.43E-02 |
| <b>TBL1XR1-AS1</b>   | ENSG00000231310 | 1.20 | 1.06 | 1.37 | 5.20E-03 | 3.91E-02 |
| <b>CTD-2207P18.2</b> | ENSG00000258976 | 1.20 | 1.08 | 1.34 | 8.70E-04 | 1.10E-02 |
| <b>COL6A4P2</b>      | ENSG00000228252 | 1.20 | 1.08 | 1.34 | 9.20E-04 | 1.14E-02 |
| <b>RN7SKP23</b>      | ENSG00000280039 | 1.20 | 1.07 | 1.35 | 1.70E-03 | 1.74E-02 |
| <b>AC068657.2</b>    | ENSG00000223908 | 1.20 | 1.07 | 1.36 | 2.60E-03 | 2.38E-02 |
| <b>GRK5-IT1</b>      | ENSG00000228485 | 1.20 | 1.10 | 1.31 | 2.60E-05 | 7.06E-04 |
| <b>CTD-2538C1.2</b>  | ENSG00000267475 | 1.20 | 1.10 | 1.32 | 9.10E-05 | 1.94E-03 |
| <b>RP11-14I17.3</b>  | ENSG00000254362 | 1.20 | 1.08 | 1.34 | 9.60E-04 | 1.18E-02 |
| <b>RP11-265N6.2</b>  | ENSG00000261822 | 1.20 | 1.06 | 1.36 | 3.70E-03 | 3.03E-02 |
| <b>RP11-543B16.2</b> | ENSG00000226986 | 1.20 | 1.06 | 1.36 | 3.00E-03 | 2.62E-02 |
| <b>LINC00658</b>     | ENSG00000226995 | 1.20 | 1.14 | 1.27 | 2.90E-11 | 1.08E-08 |
| <b>RP4-584D14.7</b>  | ENSG00000261305 | 1.20 | 1.06 | 1.36 | 3.60E-03 | 2.97E-02 |
| <b>LINC00891</b>     | ENSG00000281852 | 1.20 | 1.08 | 1.34 | 1.00E-03 | 1.19E-02 |
| <b>RP4-635E18.6</b>  | ENSG00000230337 | 1.20 | 1.07 | 1.36 | 2.90E-03 | 2.56E-02 |
| <b>AC006372.4</b>    | ENSG00000234210 | 1.20 | 1.05 | 1.37 | 6.30E-03 | 4.52E-02 |
| <b>GGTLC5P</b>       | ENSG00000276160 | 1.20 | 1.10 | 1.31 | 2.50E-05 | 6.85E-04 |
| <b>RP11-563J2.3</b>  | ENSG00000212743 | 1.20 | 1.09 | 1.32 | 2.00E-04 | 3.52E-03 |
| <b>RP11-96D1.8</b>   | ENSG00000279649 | 1.20 | 1.06 | 1.36 | 3.10E-03 | 2.68E-02 |
| <b>KYNUP2</b>        | ENSG00000265746 | 1.20 | 1.08 | 1.33 | 4.60E-04 | 6.67E-03 |
| <b>RP11-618G20.1</b> | ENSG00000258964 | 1.20 | 1.12 | 1.29 | 3.00E-07 | 1.98E-05 |
| <b>MTND1P32</b>      | ENSG00000232282 | 1.20 | 1.08 | 1.34 | 9.60E-04 | 1.18E-02 |
| <b>CFLAR-AS1</b>     | ENSG00000226312 | 1.20 | 1.07 | 1.35 | 2.30E-03 | 2.19E-02 |
| <b>AC064852.4</b>    | ENSG00000241409 | 1.20 | 1.07 | 1.35 | 1.60E-03 | 1.66E-02 |
| <b>RNASEH1P1</b>     | ENSG00000265790 | 1.20 | 1.08 | 1.34 | 9.90E-04 | 1.19E-02 |

|                      |                 |      |      |      |          |          |
|----------------------|-----------------|------|------|------|----------|----------|
| <b>RP11-723O4.9</b>  | ENSG00000261159 | 1.20 | 1.09 | 1.32 | 2.70E-04 | 4.42E-03 |
| <b>RP11-20E24.1</b>  | ENSG00000257526 | 1.20 | 1.07 | 1.34 | 1.50E-03 | 1.60E-02 |
| <b>HK2P1</b>         | ENSG00000228612 | 1.20 | 1.06 | 1.36 | 3.20E-03 | 2.75E-02 |
| <b>RP3-508I15.14</b> | ENSG00000225450 | 1.20 | 1.05 | 1.37 | 7.30E-03 | 4.98E-02 |
| <b>RP11-697N18.2</b> | ENSG00000254065 | 1.20 | 1.07 | 1.34 | 1.20E-03 | 1.35E-02 |
| <b>TTC4P1</b>        | ENSG00000221971 | 1.20 | 1.09 | 1.33 | 3.60E-04 | 5.54E-03 |
| <b>CTD-2201I18.1</b> | ENSG00000249825 | 1.20 | 1.08 | 1.33 | 7.20E-04 | 9.46E-03 |
| <b>RP1-137D17.1</b>  | ENSG00000226194 | 1.20 | 1.11 | 1.30 | 5.60E-06 | 2.00E-04 |
| <b>BRWD1-AS2</b>     | ENSG00000255568 | 1.20 | 1.07 | 1.34 | 1.30E-03 | 1.43E-02 |
| <b>RABGAP1L-IT1</b>  | ENSG00000223525 | 1.20 | 1.10 | 1.31 | 3.50E-05 | 8.94E-04 |
| <b>RP11-338N10.2</b> | ENSG00000270035 | 1.20 | 1.12 | 1.29 | 3.40E-07 | 2.20E-05 |
| <b>AL590762.10</b>   | ENSG00000229601 | 1.20 | 1.05 | 1.37 | 7.20E-03 | 4.94E-02 |
| <b>ZFY-AS1</b>       | ENSG00000233070 | 1.20 | 1.08 | 1.33 | 6.10E-04 | 8.37E-03 |
| <b>AC009506.2</b>    | ENSG00000225369 | 1.20 | 1.08 | 1.33 | 5.00E-04 | 7.14E-03 |
| <b>RP11-380G5.2</b>  | ENSG00000224745 | 1.20 | 1.05 | 1.36 | 6.00E-03 | 4.35E-02 |
| <b>CTD-2102P23.1</b> | ENSG00000255875 | 1.20 | 1.05 | 1.36 | 5.40E-03 | 4.01E-02 |
| <b>MGAT4EP</b>       | ENSG00000184774 | 1.20 | 1.10 | 1.31 | 5.80E-05 | 1.34E-03 |
| <b>RP11-119H12.4</b> | ENSG00000234841 | 1.20 | 1.07 | 1.34 | 1.50E-03 | 1.60E-02 |
| <b>CTA-246H3.8</b>   | ENSG00000230637 | 1.20 | 1.07 | 1.34 | 1.70E-03 | 1.74E-02 |
| <b>INGX</b>          | ENSG00000243468 | 1.20 | 1.05 | 1.36 | 5.60E-03 | 4.13E-02 |
| <b>FAUP1</b>         | ENSG00000235297 | 1.20 | 1.14 | 1.26 | 1.20E-12 | 8.20E-10 |
| <b>CTC-246B18.8</b>  | ENSG00000268262 | 1.20 | 1.07 | 1.34 | 1.90E-03 | 1.88E-02 |
| <b>OR7E36P</b>       | ENSG00000205240 | 1.20 | 1.13 | 1.26 | 8.30E-11 | 2.39E-08 |
| <b>RP11-44N11.2</b>  | ENSG00000272384 | 1.20 | 1.11 | 1.29 | 3.00E-06 | 1.21E-04 |
| <b>RP11-211C9.1</b>  | ENSG00000254367 | 1.20 | 1.06 | 1.35 | 4.00E-03 | 3.22E-02 |
| <b>AC003989.4</b>    | ENSG00000227948 | 1.20 | 1.05 | 1.36 | 5.90E-03 | 4.30E-02 |
| <b>RP11-354P11.8</b> | ENSG00000266987 | 1.20 | 1.05 | 1.36 | 6.50E-03 | 4.60E-02 |
| <b>FAM103A2P</b>     | ENSG00000235272 | 1.20 | 1.11 | 1.28 | 5.80E-07 | 3.30E-05 |
| <b>RP11-503N18.5</b> | ENSG00000251229 | 1.20 | 1.09 | 1.31 | 1.80E-04 | 3.24E-03 |

|                      |                 |      |      |      |          |          |
|----------------------|-----------------|------|------|------|----------|----------|
| <b>CTB-61M7.2</b>    | ENSG00000268734 | 1.20 | 1.08 | 1.33 | 9.60E-04 | 1.18E-02 |
| <b>RP11-330C7.3</b>  | ENSG00000225505 | 1.20 | 1.05 | 1.36 | 7.20E-03 | 4.94E-02 |
| <b>CTA-992D9.11</b>  | ENSG00000279440 | 1.20 | 1.11 | 1.29 | 2.60E-06 | 1.08E-04 |
| <b>RP1-102E24.8</b>  | ENSG00000256433 | 1.20 | 1.08 | 1.33 | 7.10E-04 | 9.34E-03 |
| <b>WDR86-AS1</b>     | ENSG00000243836 | 1.20 | 1.14 | 1.26 | 7.40E-12 | 3.56E-09 |
| <b>RP11-392A14.8</b> | ENSG00000279489 | 1.19 | 1.06 | 1.35 | 4.80E-03 | 3.69E-02 |
| <b>RP11-2E11.6</b>   | ENSG00000270823 | 1.19 | 1.05 | 1.35 | 5.40E-03 | 4.01E-02 |
| <b>RP11-440D17.3</b> | ENSG00000272913 | 1.19 | 1.06 | 1.34 | 3.00E-03 | 2.62E-02 |
| <b>DNM1P35</b>       | ENSG00000246877 | 1.19 | 1.09 | 1.31 | 2.00E-04 | 3.52E-03 |
| <b>CTC-250I14.6</b>  | ENSG00000267598 | 1.19 | 1.06 | 1.35 | 5.00E-03 | 3.80E-02 |
| <b>MYL12BP2</b>      | ENSG00000227765 | 1.19 | 1.10 | 1.29 | 1.30E-05 | 4.01E-04 |
| <b>CTD-2003C8.2</b>  | ENSG00000250041 | 1.19 | 1.09 | 1.31 | 1.20E-04 | 2.39E-03 |
| <b>LINC00506</b>     | ENSG00000281392 | 1.19 | 1.08 | 1.32 | 6.60E-04 | 8.89E-03 |
| <b>AC007349.5</b>    | ENSG00000235728 | 1.19 | 1.07 | 1.33 | 1.60E-03 | 1.66E-02 |
| <b>RP11-843B15.4</b> | ENSG00000277342 | 1.19 | 1.06 | 1.34 | 3.50E-03 | 2.92E-02 |
| <b>RP11-12M9.3</b>   | ENSG00000237214 | 1.19 | 1.08 | 1.32 | 6.50E-04 | 8.80E-03 |
| <b>ADAMTS7P4</b>     | ENSG00000218052 | 1.19 | 1.05 | 1.35 | 5.30E-03 | 3.96E-02 |
| <b>RP11-6O2.4</b>    | ENSG00000261054 | 1.19 | 1.09 | 1.30 | 1.00E-04 | 2.06E-03 |
| <b>TCAM1P</b>        | ENSG00000240280 | 1.19 | 1.09 | 1.31 | 2.70E-04 | 4.42E-03 |
| <b>RPS15AP12</b>     | ENSG00000232134 | 1.19 | 1.06 | 1.34 | 3.20E-03 | 2.75E-02 |
| <b>NA</b>            | ENSG00000280874 | 1.19 | 1.12 | 1.27 | 8.60E-08 | 7.65E-06 |
| <b>NA</b>            | ENSG00000281134 | 1.19 | 1.12 | 1.27 | 8.60E-08 | 7.65E-06 |
| <b>KB-173C10.1</b>   | ENSG00000253842 | 1.19 | 1.10 | 1.29 | 1.00E-05 | 3.23E-04 |
| <b>ATP1B3-AS1</b>    | ENSG00000244124 | 1.19 | 1.08 | 1.32 | 6.30E-04 | 8.58E-03 |
| <b>RP11-818O24.2</b> | ENSG00000280408 | 1.19 | 1.05 | 1.35 | 5.50E-03 | 4.07E-02 |
| <b>MIR9-3HG</b>      | ENSG00000255571 | 1.19 | 1.07 | 1.33 | 1.90E-03 | 1.88E-02 |
| <b>RN7SL600P</b>     | ENSG00000274963 | 1.19 | 1.09 | 1.31 | 2.40E-04 | 4.05E-03 |
| <b>POM121L7</b>      | ENSG00000239511 | 1.19 | 1.10 | 1.29 | 2.00E-05 | 5.77E-04 |
| <b>AD000864.6</b>    | ENSG00000280194 | 1.19 | 1.09 | 1.31 | 2.40E-04 | 4.05E-03 |

|                      |                 |      |      |      |          |          |
|----------------------|-----------------|------|------|------|----------|----------|
| <b>HSPD1P1</b>       | ENSG00000213430 | 1.19 | 1.06 | 1.34 | 3.50E-03 | 2.92E-02 |
| <b>RP11-451H23.1</b> | ENSG00000250749 | 1.19 | 1.07 | 1.32 | 9.60E-04 | 1.18E-02 |
| <b>RP1-212P9.3</b>   | ENSG00000233427 | 1.19 | 1.05 | 1.35 | 5.10E-03 | 3.86E-02 |
| <b>CTB-139P11.2</b>  | ENSG00000279996 | 1.19 | 1.08 | 1.32 | 8.10E-04 | 1.04E-02 |
| <b>RP11-357P18.2</b> | ENSG00000274245 | 1.19 | 1.08 | 1.31 | 4.40E-04 | 6.44E-03 |
| <b>RP11-820K3.2</b>  | ENSG00000225349 | 1.19 | 1.06 | 1.34 | 3.10E-03 | 2.68E-02 |
| <b>RP11-713D19.1</b> | ENSG00000273233 | 1.19 | 1.06 | 1.33 | 2.80E-03 | 2.50E-02 |
| <b>AP000487.4</b>    | ENSG00000254495 | 1.19 | 1.06 | 1.33 | 2.60E-03 | 2.38E-02 |
| <b>RP11-530A18.1</b> | ENSG00000220685 | 1.19 | 1.06 | 1.34 | 3.00E-03 | 2.62E-02 |
| <b>RP11-533E19.2</b> | ENSG00000261831 | 1.19 | 1.05 | 1.35 | 6.00E-03 | 4.35E-02 |
| <b>ATP2A1-AS1</b>    | ENSG00000260442 | 1.19 | 1.07 | 1.32 | 9.70E-04 | 1.19E-02 |
| <b>RP11-138A9.2</b>  | ENSG00000273319 | 1.19 | 1.05 | 1.34 | 4.70E-03 | 3.64E-02 |
| <b>CTB-5506.4</b>    | ENSG00000267670 | 1.19 | 1.06 | 1.33 | 2.40E-03 | 2.26E-02 |
| <b>RP11-497H17.1</b> | ENSG00000262663 | 1.19 | 1.14 | 1.24 | 0.00E+00 | 0.00E+00 |
| <b>RMRP</b>          | ENSG00000277027 | 1.19 | 1.05 | 1.35 | 5.80E-03 | 4.24E-02 |
| <b>CDIPT-AS1</b>     | ENSG00000214725 | 1.19 | 1.09 | 1.30 | 1.40E-04 | 2.68E-03 |
| <b>RN7SL8P</b>       | ENSG00000243352 | 1.19 | 1.09 | 1.30 | 1.10E-04 | 2.24E-03 |
| <b>RP11-295B17.6</b> | ENSG00000271437 | 1.19 | 1.07 | 1.32 | 8.90E-04 | 1.12E-02 |
| <b>RP5-1073O3.2</b>  | ENSG00000231128 | 1.19 | 1.12 | 1.27 | 8.60E-08 | 7.65E-06 |
| <b>TUBB8P7</b>       | ENSG00000261812 | 1.19 | 1.05 | 1.34 | 4.70E-03 | 3.64E-02 |
| <b>RP11-709D24.8</b> | ENSG00000278434 | 1.19 | 1.06 | 1.33 | 2.50E-03 | 2.34E-02 |
| <b>DENND5B-AS1</b>   | ENSG00000255867 | 1.19 | 1.05 | 1.34 | 4.80E-03 | 3.69E-02 |
| <b>RP11-1100L3.8</b> | ENSG00000259884 | 1.19 | 1.05 | 1.34 | 4.70E-03 | 3.64E-02 |
| <b>AC055764.1</b>    | ENSG00000234136 | 1.19 | 1.06 | 1.33 | 2.70E-03 | 2.44E-02 |
| <b>RP5-965G21.4</b>  | ENSG00000274414 | 1.19 | 1.10 | 1.28 | 3.30E-06 | 1.29E-04 |
| <b>POM121L9P</b>     | ENSG00000128262 | 1.19 | 1.08 | 1.30 | 3.60E-04 | 5.54E-03 |
| <b>MIR3945HG</b>     | ENSG00000251230 | 1.19 | 1.09 | 1.30 | 1.70E-04 | 3.10E-03 |
| <b>AC067945.4</b>    | ENSG00000231858 | 1.19 | 1.07 | 1.31 | 8.40E-04 | 1.07E-02 |
| <b>AC004987.9</b>    | ENSG00000233225 | 1.19 | 1.06 | 1.33 | 3.80E-03 | 3.10E-02 |

|                      |                 |      |      |      |          |          |
|----------------------|-----------------|------|------|------|----------|----------|
| <b>RP11-354B3.1</b>  | ENSG00000258632 | 1.19 | 1.06 | 1.33 | 3.80E-03 | 3.10E-02 |
| <b>HNRNPA3P2</b>     | ENSG00000227688 | 1.18 | 1.06 | 1.33 | 3.40E-03 | 2.86E-02 |
| <b>SRP9P1</b>        | ENSG00000180581 | 1.18 | 1.09 | 1.29 | 5.80E-05 | 1.34E-03 |
| <b>RP11-388M20.6</b> | ENSG00000260304 | 1.18 | 1.08 | 1.30 | 2.70E-04 | 4.42E-03 |
| <b>RN7SL417P</b>     | ENSG00000244056 | 1.18 | 1.08 | 1.30 | 4.30E-04 | 6.33E-03 |
| <b>RP11-303E16.5</b> | ENSG00000261141 | 1.18 | 1.10 | 1.27 | 2.00E-06 | 8.71E-05 |
| <b>RP5-1033E15.3</b> | ENSG00000279642 | 1.18 | 1.06 | 1.32 | 2.10E-03 | 2.02E-02 |
| <b>MAFA-AS1</b>      | ENSG00000254338 | 1.18 | 1.06 | 1.32 | 2.40E-03 | 2.26E-02 |
| <b>RP11-603B24.2</b> | ENSG00000259098 | 1.18 | 1.08 | 1.30 | 3.80E-04 | 5.76E-03 |
| <b>RP11-350N15.5</b> | ENSG00000272092 | 1.18 | 1.07 | 1.31 | 1.20E-03 | 1.35E-02 |
| <b>LINC00452</b>     | ENSG00000229373 | 1.18 | 1.11 | 1.26 | 2.20E-07 | 1.60E-05 |
| <b>RP11-611O2.1</b>  | ENSG00000256325 | 1.18 | 1.09 | 1.29 | 7.50E-05 | 1.66E-03 |
| <b>AC019186.1</b>    | ENSG00000234584 | 1.18 | 1.07 | 1.31 | 1.10E-03 | 1.27E-02 |
| <b>RP11-266J6.2</b>  | ENSG00000269886 | 1.18 | 1.05 | 1.34 | 6.90E-03 | 4.78E-02 |
| <b>RP11-532F6.3</b>  | ENSG00000272463 | 1.18 | 1.05 | 1.34 | 6.70E-03 | 4.70E-02 |
| <b>LINC00942</b>     | ENSG00000249628 | 1.18 | 1.09 | 1.28 | 6.50E-05 | 1.46E-03 |
| <b>RP11-426D19.1</b> | ENSG00000279555 | 1.18 | 1.05 | 1.33 | 6.60E-03 | 4.66E-02 |
| <b>CITF22-92A6.2</b> | ENSG00000280424 | 1.18 | 1.05 | 1.33 | 5.00E-03 | 3.80E-02 |
| <b>AMZ2P2</b>        | ENSG00000219249 | 1.18 | 1.06 | 1.32 | 3.10E-03 | 2.68E-02 |
| <b>RP11-452J21.2</b> | ENSG00000249234 | 1.18 | 1.05 | 1.33 | 5.20E-03 | 3.91E-02 |
| <b>RP11-290F24.6</b> | ENSG00000267940 | 1.18 | 1.06 | 1.31 | 2.10E-03 | 2.02E-02 |
| <b>RP4-794I6.4</b>   | ENSG00000277287 | 1.18 | 1.06 | 1.31 | 2.10E-03 | 2.02E-02 |
| <b>NUDT16P1</b>      | ENSG00000246082 | 1.18 | 1.06 | 1.31 | 2.00E-03 | 1.95E-02 |
| <b>CTA-384D8.34</b>  | ENSG00000273272 | 1.18 | 1.06 | 1.32 | 3.40E-03 | 2.86E-02 |
| <b>RP11-12A20.7</b>  | ENSG00000274911 | 1.18 | 1.06 | 1.31 | 1.80E-03 | 1.81E-02 |
| <b>RP11-571M6.18</b> | ENSG00000269903 | 1.18 | 1.05 | 1.32 | 4.40E-03 | 3.47E-02 |
| <b>CTB-31O20.9</b>   | ENSG00000267232 | 1.18 | 1.08 | 1.29 | 1.30E-04 | 2.53E-03 |
| <b>RP11-219B4.7</b>  | ENSG00000260493 | 1.18 | 1.09 | 1.27 | 1.60E-05 | 4.76E-04 |
| <b>CCNJP2</b>        | ENSG00000223896 | 1.18 | 1.06 | 1.32 | 3.60E-03 | 2.97E-02 |

|                       |                 |      |      |      |          |          |
|-----------------------|-----------------|------|------|------|----------|----------|
| <b>ZNF847P</b>        | ENSG00000215812 | 1.18 | 1.06 | 1.32 | 3.30E-03 | 2.81E-02 |
| <b>RP4-752I6.1</b>    | ENSG00000241169 | 1.18 | 1.06 | 1.31 | 2.40E-03 | 2.26E-02 |
| <b>LINC00540</b>      | ENSG00000276476 | 1.18 | 1.09 | 1.28 | 5.70E-05 | 1.33E-03 |
| <b>RP11-94H18.1</b>   | ENSG00000248964 | 1.18 | 1.08 | 1.29 | 2.80E-04 | 4.55E-03 |
| <b>AP001442.2</b>     | ENSG00000233783 | 1.18 | 1.06 | 1.31 | 1.60E-03 | 1.66E-02 |
| <b>RP5-937E21.8</b>   | ENSG00000225261 | 1.18 | 1.12 | 1.24 | 3.70E-11 | 1.30E-08 |
| <b>RP11-401P9.1</b>   | ENSG00000260029 | 1.18 | 1.06 | 1.31 | 2.90E-03 | 2.56E-02 |
| <b>UBE2R2-AS1</b>     | ENSG00000235481 | 1.18 | 1.05 | 1.32 | 4.50E-03 | 3.52E-02 |
| <b>RP13-228J13.5</b>  | ENSG00000230578 | 1.18 | 1.07 | 1.30 | 1.40E-03 | 1.51E-02 |
| <b>SNORA46</b>        | ENSG00000207493 | 1.18 | 1.07 | 1.30 | 7.10E-04 | 9.34E-03 |
| <b>LINC01284</b>      | ENSG00000230317 | 1.18 | 1.05 | 1.32 | 4.90E-03 | 3.75E-02 |
| <b>RN7SL209P</b>      | ENSG00000240927 | 1.18 | 1.05 | 1.32 | 3.80E-03 | 3.10E-02 |
| <b>RP13-1056D16.2</b> | ENSG00000244730 | 1.18 | 1.10 | 1.26 | 4.10E-06 | 1.57E-04 |
| <b>RP11-13P5.1</b>    | ENSG00000224478 | 1.18 | 1.05 | 1.32 | 5.10E-03 | 3.86E-02 |
| <b>CTD-2236F14.1</b>  | ENSG00000249713 | 1.18 | 1.08 | 1.29 | 2.80E-04 | 4.55E-03 |
| <b>DRAIC</b>          | ENSG00000245750 | 1.18 | 1.09 | 1.27 | 2.50E-05 | 6.85E-04 |
| <b>MIR3142HG</b>      | ENSG00000253522 | 1.18 | 1.06 | 1.31 | 2.70E-03 | 2.44E-02 |
| <b>IGKV2-29</b>       | ENSG00000253998 | 1.18 | 1.14 | 1.21 | 0.00E+00 | 0.00E+00 |
| <b>YBX1P3</b>         | ENSG00000240002 | 1.18 | 1.05 | 1.32 | 6.50E-03 | 4.60E-02 |
| <b>RP11-862L9.3</b>   | ENSG00000266844 | 1.18 | 1.07 | 1.29 | 6.80E-04 | 9.08E-03 |
| <b>VN1R82P</b>        | ENSG00000268995 | 1.18 | 1.05 | 1.31 | 4.50E-03 | 3.52E-02 |
| <b>CTC-205M6.5</b>    | ENSG00000260841 | 1.18 | 1.05 | 1.31 | 3.70E-03 | 3.03E-02 |
| <b>IFNWP9</b>         | ENSG00000226597 | 1.18 | 1.07 | 1.30 | 1.20E-03 | 1.35E-02 |
| <b>RP11-656D10.7</b>  | ENSG00000279667 | 1.18 | 1.10 | 1.25 | 3.60E-07 | 2.29E-05 |
| <b>RP11-567M16.1</b>  | ENSG00000267287 | 1.17 | 1.05 | 1.32 | 5.40E-03 | 4.01E-02 |
| <b>MTCYBP28</b>       | ENSG00000260161 | 1.17 | 1.07 | 1.28 | 3.90E-04 | 5.87E-03 |
| <b>AC073115.7</b>     | ENSG00000229628 | 1.17 | 1.06 | 1.30 | 1.50E-03 | 1.60E-02 |
| <b>LINC01128</b>      | ENSG00000228794 | 1.17 | 1.11 | 1.24 | 3.50E-09 | 5.54E-07 |
| <b>RP11-216N14.7</b>  | ENSG00000223599 | 1.17 | 1.05 | 1.32 | 5.70E-03 | 4.18E-02 |

|                      |                 |      |      |      |          |          |
|----------------------|-----------------|------|------|------|----------|----------|
| <b>PDPK2P</b>        | ENSG00000205918 | 1.17 | 1.06 | 1.30 | 1.40E-03 | 1.51E-02 |
| <b>RP11-167N4.4</b>  | ENSG00000256723 | 1.17 | 1.07 | 1.28 | 3.30E-04 | 5.18E-03 |
| <b>RP11-807E13.3</b> | ENSG00000267656 | 1.17 | 1.07 | 1.29 | 8.60E-04 | 1.09E-02 |
| <b>RP11-63A11.1</b>  | ENSG00000250781 | 1.17 | 1.10 | 1.25 | 1.10E-06 | 5.53E-05 |
| <b>RP11-12A20.4</b>  | ENSG00000278134 | 1.17 | 1.05 | 1.31 | 6.00E-03 | 4.35E-02 |
| <b>RP11-890B15.2</b> | ENSG00000254842 | 1.17 | 1.07 | 1.28 | 7.00E-04 | 9.25E-03 |
| <b>AC007283.4</b>    | ENSG00000235579 | 1.17 | 1.07 | 1.29 | 1.10E-03 | 1.27E-02 |
| <b>LINC00640</b>     | ENSG00000258479 | 1.17 | 1.11 | 1.23 | 3.80E-09 | 5.67E-07 |
| <b>RNVU1-3</b>       | ENSG00000201183 | 1.17 | 1.08 | 1.27 | 6.30E-05 | 1.42E-03 |
| <b>RP13-870H17.3</b> | ENSG00000254872 | 1.17 | 1.10 | 1.25 | 1.30E-06 | 6.20E-05 |
| <b>RP11-30K9.5</b>   | ENSG00000259353 | 1.17 | 1.09 | 1.26 | 9.40E-06 | 3.07E-04 |
| <b>RP11-182J1.14</b> | ENSG00000259683 | 1.17 | 1.06 | 1.30 | 2.30E-03 | 2.19E-02 |
| <b>RP11-665C16.6</b> | ENSG00000258413 | 1.17 | 1.06 | 1.29 | 1.60E-03 | 1.66E-02 |
| <b>LINC01307</b>     | ENSG00000231671 | 1.17 | 1.09 | 1.26 | 5.00E-05 | 1.19E-03 |
| <b>RP5-891H21.5</b>  | ENSG00000271329 | 1.17 | 1.08 | 1.27 | 1.00E-04 | 2.06E-03 |
| <b>RP11-255G12.2</b> | ENSG00000258942 | 1.17 | 1.05 | 1.31 | 4.60E-03 | 3.59E-02 |
| <b>RPL35P1</b>       | ENSG00000237991 | 1.17 | 1.07 | 1.29 | 9.40E-04 | 1.16E-02 |
| <b>RP11-218E20.3</b> | ENSG00000258711 | 1.17 | 1.08 | 1.27 | 8.30E-05 | 1.81E-03 |
| <b>RP11-641D5.1</b>  | ENSG00000213178 | 1.17 | 1.05 | 1.31 | 6.20E-03 | 4.46E-02 |
| <b>RP11-260E18.1</b> | ENSG00000246214 | 1.17 | 1.07 | 1.29 | 1.00E-03 | 1.19E-02 |
| <b>RP11-67L14.1</b>  | ENSG00000280228 | 1.17 | 1.12 | 1.22 | 2.70E-13 | 2.19E-10 |
| <b>LETM1P2</b>       | ENSG00000268660 | 1.17 | 1.05 | 1.30 | 4.50E-03 | 3.52E-02 |
| <b>RN7SL692P</b>     | ENSG00000239710 | 1.17 | 1.05 | 1.30 | 3.50E-03 | 2.92E-02 |
| <b>RNU5E-1</b>       | ENSG00000199347 | 1.17 | 1.07 | 1.28 | 8.70E-04 | 1.10E-02 |
| <b>RP4-693M11.3</b>  | ENSG00000258660 | 1.17 | 1.07 | 1.28 | 8.20E-04 | 1.05E-02 |
| <b>AP000240.9</b>    | ENSG00000273017 | 1.17 | 1.05 | 1.30 | 3.80E-03 | 3.10E-02 |
| <b>RP11-56B16.4</b>  | ENSG00000259185 | 1.17 | 1.10 | 1.24 | 3.80E-07 | 2.37E-05 |
| <b>RP11-29H23.6</b>  | ENSG00000223503 | 1.17 | 1.09 | 1.25 | 3.60E-06 | 1.40E-04 |
| <b>LINC01251</b>     | ENSG00000233776 | 1.17 | 1.06 | 1.29 | 1.30E-03 | 1.43E-02 |

|                      |                 |      |      |      |          |          |
|----------------------|-----------------|------|------|------|----------|----------|
| <b>LA16c-444G7.2</b> | ENSG00000260420 | 1.17 | 1.06 | 1.29 | 2.80E-03 | 2.50E-02 |
| <b>HLA-U</b>         | ENSG00000228078 | 1.17 | 1.08 | 1.27 | 1.20E-04 | 2.39E-03 |
| <b>DLEU2_6</b>       | ENSG00000276884 | 1.17 | 1.06 | 1.28 | 1.20E-03 | 1.35E-02 |
| <b>LDHAL6DP</b>      | ENSG00000250257 | 1.17 | 1.05 | 1.29 | 2.80E-03 | 2.50E-02 |
| <b>RN7SL42P</b>      | ENSG00000263999 | 1.17 | 1.06 | 1.29 | 2.40E-03 | 2.26E-02 |
| <b>CTC-510F12.7</b>  | ENSG00000273733 | 1.17 | 1.05 | 1.29 | 2.80E-03 | 2.50E-02 |
| <b>RP11-394O4.3</b>  | ENSG00000253865 | 1.17 | 1.06 | 1.29 | 1.60E-03 | 1.66E-02 |
| <b>AC011515.2</b>    | ENSG00000225370 | 1.17 | 1.05 | 1.30 | 5.30E-03 | 3.96E-02 |
| <b>RP11-324H9.1</b>  | ENSG00000280049 | 1.17 | 1.06 | 1.28 | 1.00E-03 | 1.19E-02 |
| <b>CTC-137K3.1</b>   | ENSG00000270137 | 1.17 | 1.06 | 1.29 | 2.50E-03 | 2.34E-02 |
| <b>RPS20P22</b>      | ENSG00000239218 | 1.17 | 1.05 | 1.29 | 2.60E-03 | 2.38E-02 |
| <b>RP11-566K11.7</b> | ENSG00000267048 | 1.17 | 1.05 | 1.30 | 4.80E-03 | 3.69E-02 |
| <b>AC007389.3</b>    | ENSG00000235725 | 1.17 | 1.09 | 1.24 | 2.80E-06 | 1.14E-04 |
| <b>RP11-638I2.10</b> | ENSG00000258581 | 1.17 | 1.08 | 1.26 | 6.10E-05 | 1.39E-03 |
| <b>RP11-506K6.4</b>  | ENSG00000272320 | 1.16 | 1.06 | 1.28 | 1.30E-03 | 1.43E-02 |
| <b>RP1-228H13.5</b>  | ENSG00000260920 | 1.16 | 1.09 | 1.25 | 1.60E-05 | 4.76E-04 |
| <b>CTD-2369P2.8</b>  | ENSG00000267607 | 1.16 | 1.06 | 1.27 | 9.60E-04 | 1.18E-02 |
| <b>LINC00880</b>     | ENSG00000243629 | 1.16 | 1.06 | 1.28 | 1.90E-03 | 1.88E-02 |
| <b>RP1-34B20.4</b>   | ENSG00000217275 | 1.16 | 1.09 | 1.25 | 9.80E-06 | 3.19E-04 |
| <b>NA</b>            | ENSG00000226958 | 1.16 | 1.10 | 1.23 | 2.90E-08 | 3.09E-06 |
| <b>LINC00671</b>     | ENSG00000213373 | 1.16 | 1.04 | 1.30 | 6.60E-03 | 4.66E-02 |
| <b>RP1-149L1.1</b>   | ENSG00000253809 | 1.16 | 1.04 | 1.30 | 6.10E-03 | 4.41E-02 |
| <b>YWHAEP1</b>       | ENSG00000232727 | 1.16 | 1.07 | 1.27 | 6.60E-04 | 8.89E-03 |
| <b>RNVU1-4</b>       | ENSG00000277610 | 1.16 | 1.06 | 1.28 | 1.30E-03 | 1.43E-02 |
| <b>XPOTP1</b>        | ENSG00000214185 | 1.16 | 1.06 | 1.28 | 1.90E-03 | 1.88E-02 |
| <b>RP11-342M1.7</b>  | ENSG00000233708 | 1.16 | 1.10 | 1.23 | 4.50E-07 | 2.70E-05 |
| <b>RP11-401P9.4</b>  | ENSG00000261685 | 1.16 | 1.06 | 1.28 | 1.70E-03 | 1.74E-02 |
| <b>RP11-89H19.1</b>  | ENSG00000205537 | 1.16 | 1.05 | 1.29 | 4.50E-03 | 3.52E-02 |
| <b>HNRNPLP1</b>      | ENSG00000233503 | 1.16 | 1.07 | 1.26 | 2.70E-04 | 4.42E-03 |

|                      |                 |      |      |      |          |          |
|----------------------|-----------------|------|------|------|----------|----------|
| <b>RP11-163F15.1</b> | ENSG00000203434 | 1.16 | 1.04 | 1.29 | 6.00E-03 | 4.35E-02 |
| <b>KRT8P20</b>       | ENSG00000227404 | 1.16 | 1.09 | 1.24 | 2.00E-06 | 8.71E-05 |
| <b>RP11-723O4.3</b>  | ENSG00000250796 | 1.16 | 1.10 | 1.23 | 5.40E-07 | 3.11E-05 |
| <b>USP8P1</b>        | ENSG00000214892 | 1.16 | 1.09 | 1.24 | 2.10E-06 | 9.00E-05 |
| <b>AC018693.6</b>    | ENSG00000225284 | 1.16 | 1.04 | 1.29 | 7.10E-03 | 4.89E-02 |
| <b>RP11-713P17.3</b> | ENSG00000204241 | 1.16 | 1.04 | 1.29 | 5.80E-03 | 4.24E-02 |
| <b>RP11-87C12.5</b>  | ENSG00000255856 | 1.16 | 1.07 | 1.26 | 2.00E-04 | 3.52E-03 |
| <b>RP11-425A6.5</b>  | ENSG00000273312 | 1.16 | 1.07 | 1.26 | 2.70E-04 | 4.42E-03 |
| <b>MTND5P32</b>      | ENSG00000259379 | 1.16 | 1.09 | 1.24 | 8.90E-06 | 2.94E-04 |
| <b>RP11-145E17.2</b> | ENSG00000223729 | 1.16 | 1.06 | 1.27 | 1.10E-03 | 1.27E-02 |
| <b>RP11-212P7.1</b>  | ENSG00000213280 | 1.16 | 1.05 | 1.28 | 3.30E-03 | 2.81E-02 |
| <b>EIF4BP8</b>       | ENSG00000243918 | 1.16 | 1.09 | 1.23 | 1.00E-06 | 5.15E-05 |
| <b>NIPA2P1</b>       | ENSG00000225843 | 1.16 | 1.10 | 1.23 | 1.20E-07 | 9.92E-06 |
| <b>LHFPL3-AS2</b>    | ENSG00000225329 | 1.16 | 1.11 | 1.21 | 1.90E-10 | 4.48E-08 |
| <b>AC024560.2</b>    | ENSG00000236833 | 1.16 | 1.08 | 1.24 | 2.20E-05 | 6.14E-04 |
| <b>ATP6V1E1P1</b>    | ENSG00000225099 | 1.16 | 1.09 | 1.23 | 4.70E-06 | 1.74E-04 |
| <b>RP11-973H7.1</b>  | ENSG00000260302 | 1.16 | 1.11 | 1.21 | 2.90E-10 | 6.60E-08 |
| <b>RP11-82O18.2</b>  | ENSG00000261523 | 1.16 | 1.05 | 1.28 | 2.60E-03 | 2.38E-02 |
| <b>RP11-719K4.6</b>  | ENSG00000261695 | 1.16 | 1.05 | 1.28 | 2.60E-03 | 2.38E-02 |
| <b>AC097495.3</b>    | ENSG00000228329 | 1.16 | 1.08 | 1.25 | 8.40E-05 | 1.83E-03 |
| <b>ZNF680P1</b>      | ENSG00000228014 | 1.16 | 1.06 | 1.26 | 7.80E-04 | 1.01E-02 |
| <b>RP11-554A11.8</b> | ENSG00000261070 | 1.16 | 1.06 | 1.27 | 1.30E-03 | 1.43E-02 |
| <b>RP11-862G15.2</b> | ENSG00000258499 | 1.16 | 1.06 | 1.27 | 1.30E-03 | 1.43E-02 |
| <b>LINC00567</b>     | ENSG00000259831 | 1.16 | 1.07 | 1.25 | 1.20E-04 | 2.39E-03 |
| <b>RP11-23F23.2</b>  | ENSG00000254480 | 1.16 | 1.09 | 1.23 | 4.60E-07 | 2.75E-05 |
| <b>RP1-68D18.4</b>   | ENSG00000255443 | 1.16 | 1.09 | 1.23 | 2.30E-06 | 9.76E-05 |
| <b>AC007050.17</b>   | ENSG00000236003 | 1.16 | 1.05 | 1.27 | 2.70E-03 | 2.44E-02 |
| <b>RP11-252C15.1</b> | ENSG00000254813 | 1.16 | 1.04 | 1.28 | 6.50E-03 | 4.60E-02 |
| <b>RP11-186F10.2</b> | ENSG00000257761 | 1.16 | 1.09 | 1.23 | 4.50E-06 | 1.68E-04 |

|                      |                 |      |      |      |          |          |
|----------------------|-----------------|------|------|------|----------|----------|
| <b>AP000223.42</b>   | ENSG00000260583 | 1.16 | 1.11 | 1.21 | 8.80E-11 | 2.48E-08 |
| <b>OR2B7P</b>        | ENSG00000187763 | 1.16 | 1.07 | 1.25 | 3.40E-04 | 5.30E-03 |
| <b>IGKV1OR2-1</b>    | ENSG00000235235 | 1.16 | 1.07 | 1.25 | 2.70E-04 | 4.42E-03 |
| <b>RP11-973H7.4</b>  | ENSG00000267654 | 1.15 | 1.11 | 1.20 | 2.70E-12 | 1.52E-09 |
| <b>RP11-568N6.1</b>  | ENSG00000260101 | 1.15 | 1.04 | 1.28 | 5.20E-03 | 3.91E-02 |
| <b>RP5-1009E24.9</b> | ENSG00000274949 | 1.15 | 1.05 | 1.26 | 1.70E-03 | 1.74E-02 |
| <b>RP1-137D17.2</b>  | ENSG00000272848 | 1.15 | 1.09 | 1.22 | 1.80E-06 | 7.97E-05 |
| <b>LINC00868</b>     | ENSG00000267535 | 1.15 | 1.12 | 1.19 | 0.00E+00 | 0.00E+00 |
| <b>RP6-91H8.3</b>    | ENSG00000269927 | 1.15 | 1.07 | 1.24 | 2.70E-04 | 4.42E-03 |
| <b>RP11-345P4.10</b> | ENSG00000272004 | 1.15 | 1.05 | 1.26 | 1.80E-03 | 1.81E-02 |
| <b>CTC-559E9.9</b>   | ENSG00000271499 | 1.15 | 1.09 | 1.22 | 5.20E-07 | 3.03E-05 |
| <b>RP11-701H16.4</b> | ENSG00000266954 | 1.15 | 1.05 | 1.26 | 1.90E-03 | 1.88E-02 |
| <b>RP11-338E21.1</b> | ENSG00000256670 | 1.15 | 1.05 | 1.27 | 3.80E-03 | 3.10E-02 |
| <b>FIGNL2</b>        | ENSG00000261308 | 1.15 | 1.08 | 1.24 | 6.20E-05 | 1.41E-03 |
| <b>RP1-225E12.3</b>  | ENSG00000272446 | 1.15 | 1.04 | 1.27 | 5.20E-03 | 3.91E-02 |
| <b>RP11-92G12.3</b>  | ENSG00000260088 | 1.15 | 1.04 | 1.28 | 6.90E-03 | 4.78E-02 |
| <b>RP11-618L22.1</b> | ENSG00000274723 | 1.15 | 1.05 | 1.26 | 2.90E-03 | 2.56E-02 |
| <b>RP1-78O14.1</b>   | ENSG00000257894 | 1.15 | 1.07 | 1.24 | 2.10E-04 | 3.66E-03 |
| <b>RP11-650K20.3</b> | ENSG00000257327 | 1.15 | 1.10 | 1.20 | 5.20E-10 | 1.11E-07 |
| <b>CASC4P1</b>       | ENSG00000238132 | 1.15 | 1.09 | 1.21 | 2.70E-07 | 1.84E-05 |
| <b>RP11-539G18.1</b> | ENSG00000249019 | 1.15 | 1.09 | 1.21 | 2.10E-07 | 1.53E-05 |
| <b>RP11-634H22.1</b> | ENSG00000273391 | 1.15 | 1.06 | 1.25 | 5.30E-04 | 7.49E-03 |
| <b>RP11-54F2.1</b>   | ENSG00000251196 | 1.15 | 1.05 | 1.26 | 2.80E-03 | 2.50E-02 |
| <b>FLJ31104</b>      | ENSG00000227908 | 1.15 | 1.09 | 1.21 | 2.80E-07 | 1.88E-05 |
| <b>CTD-2525P14.5</b> | ENSG00000280073 | 1.15 | 1.05 | 1.26 | 3.50E-03 | 2.92E-02 |
| <b>OR2W2P</b>        | ENSG00000217315 | 1.15 | 1.07 | 1.24 | 3.30E-04 | 5.18E-03 |
| <b>DBH-AS1</b>       | ENSG00000225756 | 1.15 | 1.08 | 1.22 | 3.50E-06 | 1.36E-04 |
| <b>RPS26P15</b>      | ENSG00000223416 | 1.15 | 1.10 | 1.20 | 8.70E-12 | 4.03E-09 |
| <b>RP11-63L7.5</b>   | ENSG00000271931 | 1.15 | 1.09 | 1.21 | 1.60E-07 | 1.27E-05 |

|                              |                 |      |      |      |          |          |
|------------------------------|-----------------|------|------|------|----------|----------|
| <b>CH507-3904.3</b>          | ENSG00000279186 | 1.15 | 1.07 | 1.23 | 1.20E-04 | 2.39E-03 |
| <b>CH507-236L23.3</b>        | ENSG00000279303 | 1.15 | 1.07 | 1.23 | 1.20E-04 | 2.39E-03 |
| <b>CH507-338C24.3</b>        | ENSG00000279967 | 1.15 | 1.07 | 1.23 | 1.20E-04 | 2.39E-03 |
| <b>OR1F2P</b>                | ENSG00000203581 | 1.15 | 1.05 | 1.25 | 2.30E-03 | 2.19E-02 |
| <b>RP4-568B10.1</b>          | ENSG00000280439 | 1.15 | 1.06 | 1.25 | 1.10E-03 | 1.27E-02 |
| <b>ACTG1P15</b>              | ENSG00000259904 | 1.15 | 1.04 | 1.27 | 6.80E-03 | 4.73E-02 |
| <b>LA16c-380F5.1</b>         | ENSG00000280062 | 1.15 | 1.07 | 1.23 | 1.70E-04 | 3.10E-03 |
| <b>ZBTB20-AS1</b>            | ENSG00000241560 | 1.15 | 1.04 | 1.26 | 5.00E-03 | 3.80E-02 |
| <b>AC007204.2</b>            | ENSG00000267268 | 1.15 | 1.07 | 1.23 | 6.60E-05 | 1.48E-03 |
| <b>ABCF2P1</b>               | ENSG00000242159 | 1.15 | 1.09 | 1.21 | 1.60E-07 | 1.27E-05 |
| <b>U1</b>                    | ENSG00000206828 | 1.15 | 1.06 | 1.24 | 6.80E-04 | 9.08E-03 |
| <b>RNVU1-7</b>               | ENSG00000206585 | 1.15 | 1.05 | 1.25 | 2.60E-03 | 2.38E-02 |
| <b>LINC01234</b>             | ENSG00000249550 | 1.15 | 1.08 | 1.21 | 1.20E-06 | 5.86E-05 |
| <b>RP6-218J18.2</b>          | ENSG00000214019 | 1.15 | 1.07 | 1.22 | 4.00E-05 | 1.00E-03 |
| <b>RP11-608O8.2</b>          | ENSG00000270739 | 1.15 | 1.04 | 1.26 | 4.30E-03 | 3.41E-02 |
| <b>RP11-364L4.3</b>          | ENSG00000250969 | 1.15 | 1.09 | 1.20 | 8.20E-08 | 7.49E-06 |
| <b>ELK2BP</b>                | ENSG00000234402 | 1.15 | 1.09 | 1.20 | 7.20E-09 | 9.54E-07 |
| <b>OR7E1P</b>                | ENSG00000255554 | 1.15 | 1.04 | 1.26 | 6.80E-03 | 4.73E-02 |
| <b>PPIL1P1</b>               | ENSG00000237951 | 1.15 | 1.09 | 1.20 | 7.10E-08 | 6.63E-06 |
| <b>VN1R40P</b>               | ENSG00000223845 | 1.14 | 1.04 | 1.26 | 6.00E-03 | 4.35E-02 |
| <b>RP11-196G18.3</b>         | ENSG00000233030 | 1.14 | 1.11 | 1.18 | 0.00E+00 | 0.00E+00 |
| <b>UBE2SP1</b>               | ENSG00000233966 | 1.14 | 1.04 | 1.26 | 4.40E-03 | 3.47E-02 |
| <b>AC005786.6</b>            | ENSG00000279590 | 1.14 | 1.06 | 1.24 | 9.20E-04 | 1.14E-02 |
| <b>TPTE2P2</b>               | ENSG00000272281 | 1.14 | 1.04 | 1.26 | 5.90E-03 | 4.30E-02 |
| <b>RP11-779O18.3</b>         | ENSG00000253736 | 1.14 | 1.05 | 1.24 | 1.90E-03 | 1.88E-02 |
| <b>RP11-465L8.1</b>          | ENSG00000256071 | 1.14 | 1.04 | 1.25 | 4.40E-03 | 3.47E-02 |
| <b>RP11-236J17.7</b>         | ENSG00000279391 | 1.14 | 1.06 | 1.23 | 3.70E-04 | 5.64E-03 |
| <b>NA</b>                    | ENSG00000279216 | 1.14 | 1.05 | 1.24 | 1.10E-03 | 1.27E-02 |
| <b>CTD-2231H16.1; lerpor</b> | ENSG00000249430 | 1.14 | 1.05 | 1.24 | 1.30E-03 | 1.43E-02 |

|                      |                 |      |      |      |          |          |
|----------------------|-----------------|------|------|------|----------|----------|
| <b>RAET1K</b>        | ENSG00000218358 | 1.14 | 1.08 | 1.20 | 4.30E-07 | 2.61E-05 |
| <b>AC083843.4</b>    | ENSG00000279518 | 1.14 | 1.04 | 1.26 | 7.00E-03 | 4.84E-02 |
| <b>AC024937.4</b>    | ENSG00000231464 | 1.14 | 1.06 | 1.23 | 6.20E-04 | 8.49E-03 |
| <b>NUTM2HP</b>       | ENSG00000232706 | 1.14 | 1.04 | 1.25 | 4.30E-03 | 3.41E-02 |
| <b>GAS6-AS2</b>      | ENSG00000272695 | 1.14 | 1.05 | 1.24 | 3.10E-03 | 2.68E-02 |
| <b>LINC01191</b>     | ENSG00000234199 | 1.14 | 1.06 | 1.23 | 5.40E-04 | 7.62E-03 |
| <b>RP4-798P15.3</b>  | ENSG00000254154 | 1.14 | 1.04 | 1.25 | 4.40E-03 | 3.47E-02 |
| <b>RP11-325P15.2</b> | ENSG00000230832 | 1.14 | 1.06 | 1.23 | 4.80E-04 | 6.90E-03 |
| <b>AC159540.3</b>    | ENSG00000237837 | 1.14 | 1.09 | 1.19 | 6.90E-08 | 6.49E-06 |
| <b>LINC00565</b>     | ENSG00000260910 | 1.14 | 1.08 | 1.19 | 1.50E-07 | 1.20E-05 |
| <b>MTUS2-AS1</b>     | ENSG00000179141 | 1.14 | 1.09 | 1.19 | 5.80E-08 | 5.54E-06 |
| <b>RP11-87G24.3</b>  | ENSG00000267568 | 1.14 | 1.04 | 1.25 | 7.30E-03 | 4.98E-02 |
| <b>IFNWP15</b>       | ENSG00000232281 | 1.14 | 1.05 | 1.24 | 2.50E-03 | 2.34E-02 |
| <b>HSP90AB2P</b>     | ENSG00000205940 | 1.14 | 1.04 | 1.25 | 5.60E-03 | 4.13E-02 |
| <b>RP11-46C24.3</b>  | ENSG00000205015 | 1.14 | 1.11 | 1.17 | 0.00E+00 | 0.00E+00 |
| <b>RP11-338N10.1</b> | ENSG00000270171 | 1.14 | 1.05 | 1.23 | 1.40E-03 | 1.51E-02 |
| <b>AC007787.3</b>    | ENSG00000279044 | 1.14 | 1.08 | 1.19 | 2.50E-07 | 1.73E-05 |
| <b>OR2L1P</b>        | ENSG00000224227 | 1.14 | 1.09 | 1.19 | 7.80E-09 | 1.00E-06 |
| <b>AC115617.2</b>    | ENSG00000233585 | 1.14 | 1.05 | 1.23 | 2.30E-03 | 2.19E-02 |
| <b>PGAM1P5</b>       | ENSG00000257150 | 1.14 | 1.05 | 1.23 | 1.40E-03 | 1.51E-02 |
| <b>RP11-472N13.3</b> | ENSG00000237797 | 1.14 | 1.04 | 1.24 | 4.80E-03 | 3.69E-02 |
| <b>KARSP3</b>        | ENSG00000262962 | 1.14 | 1.09 | 1.19 | 7.50E-09 | 9.83E-07 |
| <b>AK3P5</b>         | ENSG00000228816 | 1.14 | 1.04 | 1.24 | 6.20E-03 | 4.46E-02 |
| <b>CTC-539A10.7</b>  | ENSG00000271010 | 1.13 | 1.04 | 1.24 | 4.10E-03 | 3.28E-02 |
| <b>RP13-128O4.3</b>  | ENSG00000250995 | 1.13 | 1.04 | 1.24 | 4.60E-03 | 3.59E-02 |
| <b>AC016894.1</b>    | ENSG00000234624 | 1.13 | 1.04 | 1.24 | 6.20E-03 | 4.46E-02 |
| <b>CTD-2012K14.8</b> | ENSG00000276075 | 1.13 | 1.05 | 1.22 | 1.30E-03 | 1.43E-02 |
| <b>ZNF300P1</b>      | ENSG00000197083 | 1.13 | 1.07 | 1.19 | 3.10E-06 | 1.23E-04 |
| <b>AC097495.2</b>    | ENSG00000237576 | 1.13 | 1.04 | 1.23 | 3.00E-03 | 2.62E-02 |

|                            |                 |      |      |      |          |          |
|----------------------------|-----------------|------|------|------|----------|----------|
| <b>RP11-107F6.4</b>        | ENSG00000270702 | 1.13 | 1.08 | 1.19 | 2.10E-06 | 9.00E-05 |
| <b>RP11-589M4.4</b>        | ENSG00000271075 | 1.13 | 1.08 | 1.18 | 9.70E-08 | 8.45E-06 |
| <b>RPL13AP</b>             | ENSG00000231301 | 1.13 | 1.05 | 1.22 | 1.60E-03 | 1.66E-02 |
| <b>OR2B8P</b>              | ENSG00000182477 | 1.13 | 1.05 | 1.22 | 2.00E-03 | 1.95E-02 |
| <b>TTLL13P</b>             | ENSG00000213471 | 1.13 | 1.09 | 1.17 | 1.70E-10 | 4.09E-08 |
| <b>TPMTP1</b>              | ENSG00000267156 | 1.13 | 1.09 | 1.18 | 3.70E-09 | 5.58E-07 |
| <b>FAM167A-AS1</b>         | ENSG00000184608 | 1.13 | 1.05 | 1.22 | 1.50E-03 | 1.60E-02 |
| <b>RP11-15B24.1</b>        | ENSG00000225085 | 1.13 | 1.06 | 1.20 | 1.10E-04 | 2.24E-03 |
| <b>RPS3AP2</b>             | ENSG00000219027 | 1.13 | 1.08 | 1.18 | 7.20E-09 | 9.54E-07 |
| <b>RP11-145P16.2</b>       | ENSG00000280234 | 1.13 | 1.09 | 1.17 | 1.20E-10 | 3.00E-08 |
| <b>AP001626.1</b>          | ENSG00000225431 | 1.13 | 1.07 | 1.19 | 4.30E-06 | 1.64E-04 |
| <b>RP11-470C13.4</b>       | ENSG00000280229 | 1.13 | 1.04 | 1.22 | 4.20E-03 | 3.35E-02 |
| <b>RP11-115N4.1</b>        | ENSG00000243144 | 1.13 | 1.09 | 1.17 | 4.30E-12 | 2.23E-09 |
| <b>RP11-395I6.2</b>        | ENSG00000250338 | 1.13 | 1.05 | 1.21 | 1.60E-03 | 1.66E-02 |
| <b>AC015849.2</b>          | ENSG00000270240 | 1.13 | 1.03 | 1.23 | 6.90E-03 | 4.78E-02 |
| <b>NA</b>                  | ENSG00000280566 | 1.13 | 1.05 | 1.21 | 1.60E-03 | 1.66E-02 |
| <b>AC084082.3</b>          | ENSG00000253190 | 1.13 | 1.04 | 1.22 | 2.60E-03 | 2.38E-02 |
| <b>IFNL4</b>               | ENSG00000272395 | 1.13 | 1.07 | 1.18 | 3.40E-06 | 1.33E-04 |
| <b>RP11-15B24.4</b>        | ENSG00000232749 | 1.12 | 1.06 | 1.19 | 3.00E-05 | 7.90E-04 |
| <b>RNU1-13P</b>            | ENSG00000238825 | 1.12 | 1.05 | 1.20 | 3.40E-04 | 5.30E-03 |
| <b>Metazoa_SRP; RN7SL3</b> | ENSG00000278771 | 1.12 | 1.03 | 1.22 | 5.90E-03 | 4.30E-02 |
| <b>AC007750.5</b>          | ENSG00000236841 | 1.12 | 1.07 | 1.18 | 1.90E-06 | 8.36E-05 |
| <b>ZNF90P2</b>             | ENSG00000233366 | 1.12 | 1.08 | 1.17 | 3.40E-08 | 3.45E-06 |
| <b>NA</b>                  | ENSG00000278309 | 1.12 | 1.04 | 1.21 | 4.10E-03 | 3.28E-02 |
| <b>GMCL1P1</b>             | ENSG00000244234 | 1.12 | 1.08 | 1.17 | 3.10E-08 | 3.22E-06 |
| <b>AC016907.3</b>          | ENSG00000233862 | 1.12 | 1.07 | 1.17 | 2.40E-07 | 1.68E-05 |
| <b>RP11-443B7.3</b>        | ENSG00000258082 | 1.12 | 1.04 | 1.21 | 4.20E-03 | 3.35E-02 |
| <b>DNM1P51</b>             | ENSG00000235370 | 1.12 | 1.04 | 1.21 | 4.70E-03 | 3.64E-02 |
| <b>ZNF192P2</b>            | ENSG00000218016 | 1.12 | 1.06 | 1.18 | 1.20E-05 | 3.76E-04 |

|                      |                 |      |      |      |          |          |
|----------------------|-----------------|------|------|------|----------|----------|
| <b>FGF14-AS2</b>     | ENSG00000272143 | 1.12 | 1.03 | 1.21 | 6.30E-03 | 4.52E-02 |
| <b>RP11-107N7.1</b>  | ENSG00000253572 | 1.12 | 1.08 | 1.15 | 1.70E-12 | 1.05E-09 |
| <b>RFPL1S</b>        | ENSG00000225465 | 1.12 | 1.06 | 1.18 | 1.20E-05 | 3.76E-04 |
| <b>LINC01187</b>     | ENSG00000249601 | 1.12 | 1.04 | 1.21 | 3.40E-03 | 2.86E-02 |
| <b>RPF2P1</b>        | ENSG00000225357 | 1.12 | 1.08 | 1.16 | 1.30E-08 | 1.53E-06 |
| <b>AC067945.2</b>    | ENSG00000230686 | 1.12 | 1.08 | 1.15 | 6.70E-13 | 5.12E-10 |
| <b>U1</b>            | ENSG00000274428 | 1.12 | 1.04 | 1.20 | 3.10E-03 | 2.68E-02 |
| <b>U91328.2</b>      | ENSG00000234816 | 1.12 | 1.04 | 1.20 | 1.90E-03 | 1.88E-02 |
| <b>RNU1-120P</b>     | ENSG00000199879 | 1.12 | 1.05 | 1.19 | 4.00E-04 | 5.97E-03 |
| <b>AC004125.3</b>    | ENSG00000260264 | 1.12 | 1.09 | 1.14 | 0.00E+00 | 0.00E+00 |
| <b>AC011738.4</b>    | ENSG00000231638 | 1.12 | 1.08 | 1.15 | 1.50E-12 | 9.73E-10 |
| <b>RP11-89F3.2</b>   | ENSG00000236140 | 1.12 | 1.04 | 1.19 | 1.30E-03 | 1.43E-02 |
| <b>CTD-2583P5.3</b>  | ENSG00000261158 | 1.11 | 1.03 | 1.21 | 6.70E-03 | 4.70E-02 |
| <b>GAPDHP65</b>      | ENSG00000235587 | 1.11 | 1.03 | 1.21 | 6.60E-03 | 4.66E-02 |
| <b>LINC00240</b>     | ENSG00000224843 | 1.11 | 1.09 | 1.14 | 4.40E-16 | 4.76E-13 |
| <b>RP11-177H2.1</b>  | ENSG00000280294 | 1.11 | 1.07 | 1.15 | 6.30E-09 | 8.70E-07 |
| <b>RP11-133K1.6</b>  | ENSG00000259198 | 1.11 | 1.04 | 1.19 | 9.80E-04 | 1.19E-02 |
| <b>RPL22P18</b>      | ENSG00000230171 | 1.11 | 1.04 | 1.20 | 3.60E-03 | 2.97E-02 |
| <b>RPL7AP34</b>      | ENSG00000213312 | 1.11 | 1.08 | 1.14 | 4.40E-16 | 4.76E-13 |
| <b>RP13-49I15.6</b>  | ENSG00000273980 | 1.11 | 1.04 | 1.20 | 3.60E-03 | 2.97E-02 |
| <b>COL11A2P1</b>     | ENSG00000228688 | 1.11 | 1.07 | 1.15 | 3.30E-09 | 5.35E-07 |
| <b>RP11-184A2.3</b>  | ENSG00000229672 | 1.11 | 1.09 | 1.13 | 0.00E+00 | 0.00E+00 |
| <b>AP000593.5</b>    | ENSG00000228286 | 1.11 | 1.08 | 1.14 | 4.40E-16 | 4.76E-13 |
| <b>RP11-126O22.1</b> | ENSG00000232111 | 1.11 | 1.08 | 1.14 | 1.70E-14 | 1.70E-11 |
| <b>AC011239.2</b>    | ENSG00000279526 | 1.11 | 1.08 | 1.14 | 2.20E-11 | 8.40E-09 |
| <b>HTATSF1P1</b>     | ENSG00000223457 | 1.11 | 1.03 | 1.19 | 4.40E-03 | 3.47E-02 |
| <b>SALL4P6</b>       | ENSG00000231280 | 1.11 | 1.09 | 1.13 | 0.00E+00 | 0.00E+00 |
| <b>CTC-308K20.3</b>  | ENSG00000253785 | 1.11 | 1.06 | 1.16 | 5.10E-06 | 1.86E-04 |
| <b>TTLL10-AS1</b>    | ENSG00000205231 | 1.11 | 1.03 | 1.19 | 6.40E-03 | 4.55E-02 |

|                      |                 |      |      |      |          |          |
|----------------------|-----------------|------|------|------|----------|----------|
| <b>RP1-37N7.1</b>    | ENSG00000264177 | 1.11 | 1.04 | 1.18 | 2.40E-03 | 2.26E-02 |
| <b>Z95704.3</b>      | ENSG00000250238 | 1.11 | 1.03 | 1.19 | 3.30E-03 | 2.81E-02 |
| <b>RP11-342M1.6</b>  | ENSG00000237090 | 1.11 | 1.06 | 1.15 | 2.80E-07 | 1.88E-05 |
| <b>CSPG4P5</b>       | ENSG00000272887 | 1.11 | 1.04 | 1.18 | 1.60E-03 | 1.66E-02 |
| <b>RP11-222G7.2</b>  | ENSG00000272748 | 1.11 | 1.05 | 1.16 | 1.20E-04 | 2.39E-03 |
| <b>OR2H5P</b>        | ENSG00000232173 | 1.10 | 1.07 | 1.14 | 3.70E-09 | 5.58E-07 |
| <b>CHIAP2</b>        | ENSG00000203878 | 1.10 | 1.08 | 1.13 | 0.00E+00 | 0.00E+00 |
| <b>LINC00208</b>     | ENSG00000170983 | 1.10 | 1.05 | 1.16 | 5.30E-05 | 1.26E-03 |
| <b>GUCY1B2</b>       | ENSG00000123201 | 1.10 | 1.07 | 1.14 | 1.00E-10 | 2.65E-08 |
| <b>AC010983.1</b>    | ENSG00000235056 | 1.10 | 1.03 | 1.18 | 4.60E-03 | 3.59E-02 |
| <b>RP4-555D20.2</b>  | ENSG00000261786 | 1.10 | 1.04 | 1.17 | 9.90E-04 | 1.19E-02 |
| <b>AC006196.1</b>    | ENSG00000230173 | 1.10 | 1.04 | 1.17 | 2.10E-03 | 2.02E-02 |
| <b>RP11-544P1.3</b>  | ENSG00000280086 | 1.10 | 1.05 | 1.16 | 1.70E-04 | 3.10E-03 |
| <b>RP11-881M11.1</b> | ENSG00000256944 | 1.10 | 1.05 | 1.15 | 4.60E-05 | 1.12E-03 |
| <b>HNRNPA1P60</b>    | ENSG00000233497 | 1.10 | 1.03 | 1.18 | 7.30E-03 | 4.98E-02 |
| <b>ABHD15-AS1</b>    | ENSG00000264031 | 1.10 | 1.03 | 1.18 | 5.50E-03 | 4.07E-02 |
| <b>PNMA6B</b>        | ENSG00000268883 | 1.10 | 1.04 | 1.17 | 1.40E-03 | 1.51E-02 |
| <b>CTD-2008P7.1</b>  | ENSG00000260777 | 1.10 | 1.06 | 1.14 | 1.30E-07 | 1.07E-05 |
| <b>RP11-814P5.1</b>  | ENSG00000250007 | 1.10 | 1.05 | 1.15 | 1.60E-04 | 2.97E-03 |
| <b>RP4-555D20.1</b>  | ENSG00000280435 | 1.10 | 1.03 | 1.17 | 2.50E-03 | 2.34E-02 |
| <b>BICD1P1</b>       | ENSG00000224346 | 1.10 | 1.06 | 1.13 | 1.00E-08 | 1.21E-06 |
| <b>AC104699.1</b>    | ENSG00000224220 | 1.09 | 1.03 | 1.17 | 6.30E-03 | 4.52E-02 |
| <b>RP11-402G3.4</b>  | ENSG00000230284 | 1.09 | 1.04 | 1.15 | 5.40E-04 | 7.62E-03 |
| <b>RP11-144L1.8</b>  | ENSG00000231434 | 1.09 | 1.02 | 1.17 | 6.80E-03 | 4.73E-02 |
| <b>FAM187B2P</b>     | ENSG00000262497 | 1.09 | 1.05 | 1.13 | 2.40E-06 | 1.00E-04 |
| <b>RP4-738P15.1</b>  | ENSG00000230725 | 1.09 | 1.04 | 1.15 | 7.40E-04 | 9.65E-03 |
| <b>BCRP3</b>         | ENSG00000215481 | 1.09 | 1.04 | 1.14 | 5.00E-04 | 7.14E-03 |
| <b>RP11-414J4.2</b>  | ENSG00000261606 | 1.09 | 1.05 | 1.13 | 9.40E-07 | 4.94E-05 |
| <b>RP11-881M11.4</b> | ENSG00000256196 | 1.09 | 1.05 | 1.13 | 8.00E-06 | 2.70E-04 |

|                      |                 |      |      |      |          |          |
|----------------------|-----------------|------|------|------|----------|----------|
| <b>MIR4697HG</b>     | ENSG00000280237 | 1.09 | 1.04 | 1.14 | 3.40E-04 | 5.30E-03 |
| <b>DNAJC8P1</b>      | ENSG00000259022 | 1.08 | 1.02 | 1.15 | 5.60E-03 | 4.13E-02 |
| <b>KB-1980E6.3</b>   | ENSG00000253633 | 1.08 | 1.04 | 1.13 | 3.70E-04 | 5.64E-03 |
| <b>SNORA24</b>       | ENSG00000275994 | 1.08 | 1.03 | 1.14 | 4.10E-03 | 3.28E-02 |
| <b>AC069513.4</b>    | ENSG00000229178 | 1.08 | 1.04 | 1.12 | 5.50E-05 | 1.29E-03 |
| <b>RP11-162G10.5</b> | ENSG00000236514 | 1.08 | 1.02 | 1.13 | 4.00E-03 | 3.22E-02 |
| <b>RPL29P11</b>      | ENSG00000224858 | 1.07 | 1.05 | 1.10 | 1.60E-08 | 1.84E-06 |
| <b>RP11-417P24.1</b> | ENSG00000270371 | 1.06 | 1.03 | 1.10 | 9.10E-04 | 1.13E-02 |
| <b>RP11-490G8.1</b>  | ENSG00000241556 | 1.06 | 1.02 | 1.09 | 2.30E-03 | 2.19E-02 |
| <b>LINC01013</b>     | ENSG00000228495 | 1.05 | 1.03 | 1.08 | 2.50E-05 | 6.85E-04 |
| <b>RP11-481J2.2</b>  | ENSG00000260186 | 1.05 | 1.02 | 1.08 | 4.80E-04 | 6.90E-03 |
| <b>TMED11P</b>       | ENSG00000215367 | 1.05 | 1.02 | 1.07 | 1.50E-04 | 2.82E-03 |
| <b>RP11-74E22.6</b>  | ENSG00000272911 | 1.04 | 1.02 | 1.06 | 4.60E-04 | 6.67E-03 |

---

**Supplementary Table 7. Overexpressed lncRNAs by the agonist mix treatment in the different assayed CLL cohorts that were found also associated with a shorter TTT in 266 CLL (ICGC).**

| TP53 altered  | Fold Change (CvsA) | P-value (CvsA) | Fold Change (DvsB) | P-value (DvsB) |
|---------------|--------------------|----------------|--------------------|----------------|
| RP11-603J24.7 | 3.65               | 1.16E-02       | b.t                | n.s.           |
| Z69890.1      | 2.29               | 8.80E-03       | 2                  | 2.21E-02       |
| RPS2P35       | 2.02               | 2.07E-02       | b.t                | n.s.           |
| RP11-144L1.8  | 1.83               | 3.89E-02       | b.t                | n.s.           |
| DNAJC8P1      | 1.76               | 2.53E-02       | b.t                | n.s.           |
| CTD-2194F4.2  | 1.64               | 8.20E-03       | b.t                | n.s.           |
| RPL5P24       | 1.63               | 2.17E-02       | b.t                | n.s.           |
| GAPLINC       | 1.56               | 4.63E-02       | b.t                | n.s.           |
| YWHAEP1       | 1.55               | 1.50E-03       | b.t                | n.s.           |
| H2AFZP3       | 1.54               | 4.46E-02       | b.t                | n.s.           |
| LINC00158     | b.t                | n.s.           | 3.06               | 1.37E-02       |
| SRSF10P1      | b.t                | n.s.           | 1.97               | 4.40E-02       |
| RP11-443B7.3  | b.t                | n.s.           | 1.86               | 1.21E-02       |
| KB-1980E6.3   | b.t                | n.s.           | 1.8                | 2.25E-02       |
| LINC01187     | b.t                | n.s.           | 1.78               | 3.90E-03       |
| CTD-2227E11.1 | b.t                | n.s.           | 1.76               | 1.64E-02       |
| RP11-554A11.9 | b.t                | n.s.           | 1.61               | 4.42E-02       |
| SNORA46       | b.t                | n.s.           | 1.57               | 4.27E-02       |
| RP11-330C7.3  | b.t                | n.s.           | 1.54               | 1.60E-03       |
| RP11-126O22.1 | -1.5               | 1.95E-02       | b.t                | n.s.           |
| RP11-428K3.1  | -1.5               | 3.18E-02       | b.t                | n.s.           |
| CTD-3222D19.4 | -1.69              | 1.72E-02       | b.t                | n.s.           |
| BNIP3P41      | -1.7               | 3.25E-02       | b.t                | n.s.           |
| DLEU2         | -1.72              | 1.73E-02       | b.t                | n.s.           |
| RP11-103B5.4  | -1.75              | 1.65E-02       | b.t                | n.s.           |
| MIR302B       | -1.77              | 6.80E-03       | b.t                | n.s.           |

|                |       |          |       |          |
|----------------|-------|----------|-------|----------|
| CTA-331F8.1    | -1.98 | 4.15E-02 | b.t   | n.s.     |
| RP11-430C7.5   | -2.16 | 2.03E-02 | b.t   | n.s.     |
| RP1-102G20.2   | -2.22 | 1.31E-02 | b.t   | n.s.     |
| RP11-568N6.1   | -2.38 | 4.90E-03 | -2.23 | 2.63E-02 |
| RP11-196G18.24 | -3.15 | 4.80E-02 | -2.57 | 1.79E-02 |
| RP11-686G8.1   | b.t   | n.s.     | -2.08 | 1.80E-02 |
| LINC00426      | b.t   | n.s.     | -4.57 | 8.50E-03 |

| <b>Trisomy 12</b> | <b>Fold Change (CvsA)</b> | <b>P-value (CvsA)</b> | <b>Fold Change (DvsB)</b> | <b>P-value (DvsB)</b> |
|-------------------|---------------------------|-----------------------|---------------------------|-----------------------|
| SNORA14           | 12.42                     | 7.40E-03              | 17.07                     | 3.20E-03              |
| MALAT1            | 5.18                      | 6.90E-03              | b.t                       | n.s.                  |
| CTD-2357A8.2      | 3.33                      | 1.79E-02              | b.t                       | n.s.                  |
| OR7E102P          | 2.12                      | 3.01E-02              | b.t                       | n.s.                  |
| RPS2P46           | 1.8                       | 3.10E-02              | b.t                       | n.s.                  |
| RP11-719K4.6      | 1.66                      | 7.70E-03              | b.t                       | n.s.                  |
| RP11-82O18.2      | 1.66                      | 7.70E-03              | b.t                       | n.s.                  |
| AC055764.1        | 1.53                      | 8.10E-03              | b.t                       | n.s.                  |
| EIF4BP8           | 1.53                      | 4.20E-02              | b.t                       | n.s.                  |
| GAPLINC           | b.t                       | n.s.                  | 2.88                      | 1.97E-02              |
| RP11-46H11.3      | b.t                       | n.s.                  | 2.25                      | 1.10E-02              |
| TAGLN2P1          | b.t                       | n.s.                  | 2.13                      | 4.70E-03              |
| RP11-16E23.5      | b.t                       | n.s.                  | 1.92                      | 4.06E-02              |
| XPOTP1            | b.t                       | n.s.                  | 1.75                      | 2.12E-02              |
| RP11-15M15.1      | b.t                       | n.s.                  | 1.63                      | 4.40E-03              |
| RP11-401N16.2     | b.t                       | n.s.                  | 1.5                       | 2.35E-02              |
| RP11-475E11.2     | b.t                       | n.s.                  | -1.68                     | 4.60E-03              |
| ALMS1-IT1         | b.t                       | n.s.                  | -1.7                      | 3.86E-02              |
| CTD-2340D6.2      | b.t                       | n.s.                  | -1.7                      | 1.50E-03              |
| KYNUP2            | b.t                       | n.s.                  | -1.7                      | 1.60E-03              |

|                |       |          |       |          |
|----------------|-------|----------|-------|----------|
| RP11-480I12.10 | b.t   | n.s.     | -1.71 | 4.21E-02 |
| BIRC6-AS2      | b.t   | n.s.     | -1.83 | 6.30E-03 |
| RN7SL390P      | b.t   | n.s.     | -1.96 | 9.00E-03 |
| RP4-752I6.1    | b.t   | n.s.     | -1.97 | 3.58E-02 |
| PDXDC2P        | b.t   | n.s.     | -2.34 | 3.62E-02 |
| DLEU2          | b.t   | n.s.     | -2.79 | 2.49E-02 |
| LINC00426      | b.t   | n.s.     | -3.49 | 5.60E-03 |
| TVP23CP1       | -1.5  | 3.12E-02 | -1.6  | 9.00E-04 |
| RP11-271M24.2  | -1.51 | 7.00E-04 | b.t   | n.s.     |
| STRCP1         | -1.52 | 4.26E-02 | b.t   | n.s.     |
| PCAT1          | -1.59 | 3.10E-02 | b.t   | n.s.     |
| AP000704.5     | -1.64 | 2.20E-03 | b.t   | n.s.     |
| OR1F2P         | -1.7  | 1.47E-02 | b.t   | n.s.     |
| LINC00565      | -1.75 | 2.10E-03 | b.t   | n.s.     |
| RP11-395I6.2   | -1.79 | 7.30E-03 | b.t   | n.s.     |
| AC097495.2     | -1.81 | 4.22E-02 | b.t   | n.s.     |
| RP11-272L13.4  | -1.81 | 2.06E-02 | b.t   | n.s.     |
| LETM1P2        | -1.82 | 7.00E-04 | b.t   | n.s.     |
| RP1-111C20.4   | -1.83 | 1.84E-02 | b.t   | n.s.     |
| RP11-428K3.1   | -1.87 | 2.68E-02 | b.t   | n.s.     |
| RP11-1174L13.2 | -1.91 | 1.02E-02 | b.t   | n.s.     |
| RP11-307C12.13 | -1.93 | 2.13E-02 | b.t   | n.s.     |
| RN7SL417P      | -1.96 | 1.27E-02 | b.t   | n.s.     |
| RP11-326K13.5  | -2.01 | 2.19E-02 | b.t   | n.s.     |
| LINC00540      | -2.05 | 4.38E-02 | b.t   | n.s.     |
| AC067945.4     | -2.13 | 6.60E-03 | b.t   | n.s.     |
| RN7SL692P      | -2.32 | 1.49E-02 | b.t   | n.s.     |

| <b>WT (Barcelona)</b> | <b>Fold Change (CvsA)</b> | <b>P-value (CvsA)</b> | <b>Fold Change (DvsB)</b> | <b>P-value (DvsB)</b> |
|-----------------------|---------------------------|-----------------------|---------------------------|-----------------------|
| LINC00152             | 24.07                     | 1.27E-02              | b.t                       | n.s.                  |
| NME2P1                | 11.88                     | 6.40E-03              | b.t                       | n.s.                  |
| PSMA6P1               | 6.15                      | 5.60E-03              | 2.45                      | 3.85E-02              |
| SNORA14               | 4.87                      | 2.71E-02              | 3.95                      | 6.80E-03              |
| RP11-12M9.3           | 3.37                      | 4.23E-02              | b.t                       | n.s.                  |
| ANXA2P2               | 2.91                      | 4.40E-03              | b.t                       | n.s.                  |
| RPS2P46               | 2.72                      | 4.00E-04              | 1.91                      | 1.17E-02              |
| RP11-603J24.7         | 2.64                      | 4.26E-02              | b.t                       | n.s.                  |
| TAGLN2P1              | 2.38                      | 4.80E-03              | 4.05                      | 3.00E-04              |
| RP11-503N18.5         | 2.35                      | 4.00E-04              | b.t                       | n.s.                  |
| RP11-638I2.10         | 2.22                      | 1.92E-02              | b.t                       | n.s.                  |
| GAPLINC               | 2.2                       | 8.00E-04              | b.t                       | n.s.                  |
| RP5-827C21.1          | 2.02                      | 2.08E-02              | b.t                       | n.s.                  |
| RN7SL288P             | 1.92                      | 2.78E-02              | b.t                       | n.s.                  |
| HNRNPLP1              | 1.87                      | 6.90E-03              | b.t                       | n.s.                  |
| EIF4HP1               | 1.86                      | 4.29E-02              | b.t                       | n.s.                  |
| RP11-124N14.3         | 1.82                      | 5.30E-03              | 1.59                      | 2.40E-02              |
| LETM1P2               | 1.74                      | 3.80E-03              | b.t                       | n.s.                  |
| MALAT1                | 1.68                      | 1.83E-02              | b.t                       | n.s.                  |
| RP11-138I1.4          | 1.68                      | 2.68E-02              | b.t                       | n.s.                  |
| CTB-52I2.4            | 1.65                      | 3.42E-02              | b.t                       | n.s.                  |
| RP11-409I10.2         | 1.61                      | 3.69E-02              | b.t                       | n.s.                  |
| RP11-161H23.5         | 1.58                      | 8.00E-03              | b.t                       | n.s.                  |
| RNU1-120P             | b.t                       | n.s.                  | 6.47                      | 3.17E-02              |
| RP11-138A9.1          | b.t                       | n.s.                  | 3.89                      | 2.40E-02              |
| RNU1-13P              | b.t                       | n.s.                  | 2.93                      | 3.89E-02              |
| EEF1B2P1              | b.t                       | n.s.                  | 2.17                      | 3.07E-02              |
| RPL4P6                | b.t                       | n.s.                  | 2.13                      | 3.98E-02              |

|               |        |          |        |          |
|---------------|--------|----------|--------|----------|
| HNRNPA1P60    | b.t    | n.s.     | 2.11   | 1.44E-02 |
| RPL35P1       | b.t    | n.s.     | 1.99   | 2.89E-02 |
| CTC-444N24.7  | b.t    | n.s.     | 1.96   | 3.33E-02 |
| OR7E102P      | b.t    | n.s.     | 1.89   | 3.50E-03 |
| RPL7AP34      | b.t    | n.s.     | 1.85   | 1.10E-03 |
| Z69890.1      | b.t    | n.s.     | 1.83   | 3.43E-02 |
| RP11-490G8.1  | b.t    | n.s.     | 1.78   | 3.16E-02 |
| RPL7P19       | b.t    | n.s.     | 1.78   | 1.70E-03 |
| LLNLR-285B5.1 | b.t    | n.s.     | 1.66   | 2.55E-02 |
| RPL7P60       | b.t    | n.s.     | 1.66   | 3.86E-02 |
| RP11-313D6.3  | b.t    | n.s.     | 1.65   | 8.30E-03 |
| RPL34P21      | b.t    | n.s.     | 1.64   | 1.30E-02 |
| RP1-34B20.4   | b.t    | n.s.     | 1.58   | 2.56E-02 |
| RP3-468O1.6   | -1.52  | 2.30E-03 | b.t    | n.s.     |
| CTC-463A16.1  | -1.55  | 3.24E-02 | b.t    | n.s.     |
| LINC01284     | -1.63  | 1.90E-03 | b.t    | n.s.     |
| CTA-212A2.1   | -1.72  | 1.92E-02 | -1.78  | 1.07E-02 |
| RN7SL390P     | -1.73  | 4.40E-02 | b.t    | n.s.     |
| RNU2-6P       | -1.85  | 2.76E-02 | b.t    | n.s.     |
| RP11-96D1.8   | -1.86  | 3.88E-02 | -1.78  | 2.24E-02 |
| RP11-13P5.1   | -2.08  | 5.50E-03 | b.t    | n.s.     |
| RP11-145P16.2 | -2.08  | 3.20E-03 | b.t    | n.s.     |
| SCARNA7       | -2.19  | 4.93E-02 | b.t    | n.s.     |
| LINC00426     | -2.8   | 4.01E-02 | -8.78  | 2.10E-05 |
| RP11-430C7.5  | -2.99  | 4.10E-03 | -2.1   | 4.79E-02 |
| RP11-126K15.1 | -5.19  | 4.97E-02 | -3.72  | 2.70E-02 |
| BNIP3P41      | -25.26 | 5.55E-05 | -6.13  | 8.00E-04 |
| AC007386.4    | -41.84 | 3.81E-07 | -18.78 | 4.00E-04 |
| AC007386.4    | -41.84 | 3.81E-07 | -18.78 | 4.00E-04 |

|                |     |      |       |          |
|----------------|-----|------|-------|----------|
| RP1-159A19.4   | b.t | n.s. | -1.65 | 3.04E-02 |
| TRERNA1        | b.t | n.s. | -1.69 | 2.90E-03 |
| LOC440461      | b.t | n.s. | -1.74 | 5.23E-05 |
| RP11-626G11.3  | b.t | n.s. | -1.74 | 3.75E-02 |
| PRICKLE2-AS3   | b.t | n.s. | -1.75 | 6.00E-04 |
| RP11-167N4.4   | b.t | n.s. | -1.76 | 3.00E-03 |
| DLEU2          | b.t | n.s. | -2.05 | 4.01E-02 |
| RP11-391L3.3   | b.t | n.s. | -2.24 | 4.90E-03 |
| RP11-196G18.22 | b.t | n.s. | -2.25 | 8.20E-03 |
| RP11-43D4.2    | b.t | n.s. | -2.48 | 1.10E-02 |
| LINC00891      | b.t | n.s. | -2.77 | 6.40E-03 |
| TBC1D27        | b.t | n.s. | -2.84 | 1.90E-02 |
| CTA-246H3.11   | b.t | n.s. | -3.89 | 3.72E-02 |
| RP11-568N6.1   | b.t | n.s. | -4.02 | 1.13E-02 |
| RP11-196G18.24 | b.t | n.s. | -4.2  | 1.40E-03 |
| MYL12BP2       | b.t | n.s. | -4.92 | 1.06E-02 |
| RP11-862L9.3   | b.t | n.s. | -8.97 | 2.88E-02 |

| <b>WT (Aviano)</b> | <b>Fold Change (CvsA)</b> | <b>P-value (CvsA)</b> | <b>Fold Change (DvsB)</b> | <b>P-value (DvsB)</b> |
|--------------------|---------------------------|-----------------------|---------------------------|-----------------------|
| SNORA14            | 7.86                      | 6.40E-03              | 7.3                       | 3.30E-03              |
| HSPD1P1            | 3.62                      | 2.63E-02              | b.t                       | n.s.                  |
| TAGLN2P1           | 3.5                       | 1.34E-02              | 2.23                      | 9.30E-03              |
| RP11-603J24.7      | 2.81                      | 2.97E-02              | 3.93                      | 7.80E-03              |
| RN7SL288P          | 2.39                      | 3.20E-03              | 2.09                      | 2.60E-02              |
| NME2P1             | 2.34                      | 4.22E-02              | b.t                       | n.s.                  |
| RP11-490H24.5      | 2.34                      | 2.78E-02              | 1.67                      | 3.16E-02              |
| Z69890.1           | 2.17                      | 2.60E-03              | 2.73                      | 2.70E-03              |
| RP11-140H17.2      | 1.95                      | 2.91E-02              | 2.31                      | 1.10E-02              |
| TATDN1P1           | 1.92                      | 7.00E-04              | b.t                       | n.s.                  |

|                |       |          |      |          |
|----------------|-------|----------|------|----------|
| CTC-308K20.3   | 1.82  | 2.10E-02 | b.t  | n.s.     |
| RP1-228H13.5   | 1.81  | 4.65E-02 | b.t  | n.s.     |
| LINC01033      | 1.8   | 9.00E-04 | 1.72 | 8.40E-03 |
| LLNLR-285B5.1  | 1.78  | 1.92E-02 | b.t  | n.s.     |
| HSP90AB2P      | 1.74  | 1.89E-02 | b.t  | n.s.     |
| SLC7A5P1       | 1.74  | 1.61E-02 | b.t  | n.s.     |
| RP11-419L20.2  | 1.71  | 1.19E-02 | b.t  | n.s.     |
| RP11-554A11.9  | 1.71  | 1.39E-02 | b.t  | n.s.     |
| DNAJC8P1       | 1.69  | 4.47E-02 | b.t  | n.s.     |
| RPS2P35        | 1.64  | 2.31E-02 | b.t  | n.s.     |
| RP11-454H13.1  | 1.59  | 5.60E-03 | b.t  | n.s.     |
| RP5-827C21.1   | 1.56  | 2.02E-02 | 1.7  | 4.16E-02 |
| HNRNPLP1       | 1.52  | 2.48E-02 | b.t  | n.s.     |
| LINC00158      | 2.54  | 7.70E-02 | 5.41 | 1.90E-03 |
| ABALON         | b.t   | n.s.     | 2.7  | 4.00E-04 |
| RP11-289I10.2  | b.t   | n.s.     | 2.22 | 4.25E-02 |
| RP11-138A9.1   | b.t   | n.s.     | 2.04 | 4.22E-02 |
| RP11-124N14.3  | b.t   | n.s.     | 1.98 | 2.30E-03 |
| RP11-56B16.4   | b.t   | n.s.     | 1.98 | 1.91E-02 |
| RP11-161H23.5  | b.t   | n.s.     | 1.75 | 1.75E-02 |
| SNORA24        | b.t   | n.s.     | 1.69 | 3.58E-02 |
| RP11-144L1.8   | b.t   | n.s.     | 1.58 | 6.50E-03 |
| KB-173C10.1    | b.t   | n.s.     | 1.56 | 1.82E-02 |
| RPL7P60        | b.t   | n.s.     | 1.51 | 2.23E-02 |
| HIST2H2BC      | -1.61 | 4.60E-02 | b.t  | n.s.     |
| RP11-977G19.11 | -1.67 | 1.20E-02 | b.t  | n.s.     |
| HIST2H2BD      | -1.71 | 4.90E-03 | b.t  | n.s.     |
| RP11-391L3.3   | -1.93 | 2.24E-02 | b.t  | n.s.     |
| TBC1D27        | -1.94 | 4.58E-02 | b.t  | n.s.     |

|                |        |          |       |          |
|----------------|--------|----------|-------|----------|
| RP11-428K3.1   | -2.09  | 3.00E-04 | b.t   | n.s.     |
| RP11-567L7.3   | -2.09  | 2.30E-02 | b.t   | n.s.     |
| RP11-519C12.1  | -2.11  | 8.50E-03 | b.t   | n.s.     |
| RP11-327F22.6  | -2.14  | 5.90E-03 | b.t   | n.s.     |
| RP11-196G18.22 | -2.21  | 2.02E-02 | b.t   | n.s.     |
| RP11-2J18.1    | -2.22  | 9.50E-03 | b.t   | n.s.     |
| RP11-357P18.2  | -2.27  | 2.29E-02 | b.t   | n.s.     |
| DLEU2          | -2.33  | 1.12E-02 | -2.2  | 3.30E-02 |
| U91328.2       | -2.39  | 9.90E-03 | b.t   | n.s.     |
| RP11-430C7.5   | -2.49  | 1.30E-03 | -2.16 | 4.07E-02 |
| RP11-46H11.11  | -2.51  | 3.12E-02 | b.t   | n.s.     |
| RP11-888D10.4  | -2.65  | 4.10E-02 | b.t   | n.s.     |
| RP1-102G20.2   | -2.67  | 2.50E-03 | b.t   | n.s.     |
| RP11-568N6.1   | -2.83  | 2.50E-02 | b.t   | n.s.     |
| RP11-196G18.24 | -2.97  | 3.00E-04 | -2.08 | 1.59E-02 |
| RP11-126K15.1  | -3.31  | 3.97E-02 | b.t   | n.s.     |
| LINC00426      | -4.13  | 1.00E-04 | -6.08 | 4.58E-05 |
| AC007386.4     | -4.29  | 4.50E-03 | -2.5  | 3.53E-02 |
| AC007386.4     | -4.29  | 4.50E-03 | -2.5  | 3.53E-02 |
| CTA-212A2.1    | -4.62  | 2.22E-05 | -2.85 | 1.60E-03 |
| RP11-862L9.3   | -4.74  | 2.06E-02 | -6.16 | 3.38E-02 |
| RP11-25L3.1    | -5.15  | 8.10E-03 | b.t   | n.s.     |
| RP11-25L3.3    | -5.5   | 6.80E-03 | b.t   | n.s.     |
| BNIP3P41       | -12.01 | 1.84E-05 | -5.96 | 1.50E-03 |
| RP3-468O1.6    | b.t    | n.s.     | -1.59 | 2.66E-02 |
| PTPN2P1        | b.t    | n.s.     | -1.62 | 7.70E-03 |
| LINC00891      | b.t    | n.s.     | -2.16 | 3.80E-03 |
| MYL12BP2       | b.t    | n.s.     | -6.32 | 9.80E-03 |

b.t : below threshold (Fold Change [2]).

n.s: non significant P-val

**Supplementary Table 8. Expression levels in MEC-1 cell line of lncRNAs found significantly upregulated by agonist mix treatment and associated with shorter TTT.**

| Venny upregulated (FC ONLY) upon agonist mix               | ENSG Code       | MEC1 expression |
|------------------------------------------------------------|-----------------|-----------------|
| <b>10 elements included exclusively in "Trisomy12":</b>    |                 |                 |
| AC055764.1                                                 | ENSG00000234136 | 0               |
| CTD-2357A8.2                                               | ENSG00000279570 | 0.11            |
| EIF4BP8                                                    | ENSG00000243918 | 0.05            |
| RP11-15M15.1                                               | ENSG00000223492 | 0.01            |
| RP11-16E23.5                                               | ENSG00000275638 | 0.47            |
| RP11-401N16.2                                              | ENSG00000275381 | 0.28            |
| RP11-46H11.3                                               | ENSG00000250790 | 0.03            |
| RP11-719K4.6                                               | ENSG00000261695 | 0               |
| RP11-82O18.2                                               | ENSG00000261523 | 0               |
| XPOTP1                                                     | ENSG00000214185 | 0.08            |
| <b>11 elements included exclusively in "TP53 Altered":</b> |                 |                 |
| CTD-2194F4.2                                               | ENSG00000248288 | 0.02            |
| <b>CTD-2227E11.1</b>                                       | ENSG00000270933 | <b>3.75</b>     |
| H2AFZP3                                                    | ENSG00000218502 | 0.42            |
| <b>KB-1980E6.3</b>                                         | ENSG00000253633 | <b>10.36</b>    |
| LINC01187                                                  | ENSG00000249601 | 0               |
| RP11-330C7.3                                               | ENSG00000225505 | 0               |
| RP11-443B7.3                                               | ENSG00000258082 | 0.7             |
| RPL5P24                                                    | ENSG00000244052 | 0.01            |
| SNORA46                                                    | ENSG00000207493 | 0               |

|          |                 |      |
|----------|-----------------|------|
| SRSF10P1 | ENSG00000267717 | 0.03 |
| YWHAEP1  | ENSG00000232727 | 0.02 |

**16 elements included exclusively in "WT (Aviano)":**

|               |                 |      |
|---------------|-----------------|------|
| ABALON        | ENSG00000281376 | 0.32 |
| CTC-308K20.3  | ENSG00000253785 | 0.61 |
| HSP90AB2P     | ENSG00000205940 | 0.06 |
| HSPD1P1       | ENSG00000213430 | 1.07 |
| KB-173C10.1   | ENSG00000253842 | 0.19 |
| LINC01033     | ENSG00000249069 | 0.33 |
| RP11-140H17.2 | ENSG00000274093 | 0.16 |
| RP11-289I10.2 | ENSG00000223612 | 2.62 |
| RP11-419L20.2 | ENSG00000241556 | 0.31 |
| RP11-454H13.1 | ENSG00000243396 | 0    |
| RP11-490H24.5 | ENSG00000216285 | 3.44 |
| RP11-56B16.4  | ENSG00000259185 | 0    |
| RP1-228H13.5  | ENSG00000260920 | 1.17 |
| SLC7A5P1      | ENSG00000260727 | 0.6  |
| SNORA24       | ENSG00000275994 | 0    |
| TATDN1P1      | ENSG00000234369 | 0.06 |

**24 elements included exclusively in "WT (Barcelona)":**

|              |                 |      |
|--------------|-----------------|------|
| ANXA2P2      | ENSG00000231991 | 0.92 |
| CTB-52I2.4   | ENSG00000273654 | 2.8  |
| CTC-444N24.7 | ENSG00000279541 | 0.38 |
| EEF1B2P1     | ENSG00000231169 | 0    |
| EIF4HP1      | ENSG00000233830 | 1.75 |
| HNRNPA1P60   | ENSG00000233497 | 0    |
| LETM1P2      | ENSG00000268660 | 0    |

|                     |                 |              |
|---------------------|-----------------|--------------|
| <b>LINC00152</b>    | ENSG00000222041 | <b>11.92</b> |
| PSMA6P1             | ENSG00000215414 | 0.18         |
| RNU1-120P           | ENSG00000199879 | 0            |
| RNU1-13P            | ENSG00000238825 | 0            |
| RP11-12M9.3         | ENSG00000237214 | 2.46         |
| <b>RP11-138I1.4</b> | ENSG00000265401 | <b>68</b>    |
| RP11-313D6.3        | ENSG00000232470 | 0.4          |
| RP11-409I10.2       | ENSG00000259039 | 0.59         |
| RP11-490G8.1        | ENSG00000241556 | 0.31         |
| RP11-503N18.5       | ENSG00000251229 | 0.2          |
| RP11-638I2.10       | ENSG00000258581 | 0.32         |
| RP1-34B20.4         | ENSG00000217275 | 0.12         |
| RPL34P21            | ENSG00000244451 | 0            |
| RPL35P1             | ENSG00000237991 | 1.32         |
| RPL4P6              | ENSG00000230071 | 0.43         |
| RPL7AP34            | ENSG00000213312 | 0            |
| RPL7P19             | ENSG00000241458 | 0.14         |

---

**3 common elements in "WT (Barcelona)" and "Trisomy 12":**

|                |                 |              |
|----------------|-----------------|--------------|
| <b>MALAT1</b>  | ENSG00000251562 | <b>66.74</b> |
| OR7E102P       | ENSG00000168992 | 0            |
| <b>RPS2P46</b> | ENSG00000189343 | <b>24.59</b> |

---

**9 common elements in "WT (Barcelona)" and "WT (Aviano)":**

|               |                 |      |
|---------------|-----------------|------|
| HNRNPLP1      | ENSG00000233503 | 0    |
| LLNLR-285B5.1 | ENSG00000276578 | 0    |
| NME2P1        | ENSG00000123009 | 0.42 |
| RN7SL288P     | ENSG00000240767 | 0    |
| RP11-124N14.3 | ENSG00000234961 | 0.64 |

|               |                 |        |
|---------------|-----------------|--------|
| RP11-138A9.1  | ENSG00000271204 | 0.04   |
| RP11-161H23.5 | ENSG00000258232 | 150.89 |
| RP5-827C21.1  | ENSG00000235605 | 0.95   |
| RPL7P60       | ENSG00000214142 | 0.05   |

---

5 common elements in "WT (Aviano)" and "TP53 Altered":

|               |                 |      |
|---------------|-----------------|------|
| DNAJC8P1      | ENSG00000259022 | 0    |
| LINC00158     | ENSG00000185433 | 6.61 |
| RP11-144L1.8  | ENSG00000218276 | 0    |
| RP11-554A11.9 | ENSG00000259799 | 2.81 |
| RPS2P35       | ENSG00000238172 | 0.01 |

---

2 common elements in "WT (Barcelona)", "WT (Aviano)" and "TP53 Altered":

|               |                 |      |
|---------------|-----------------|------|
| RP11-603J24.7 | ENSG00000237493 | 0.42 |
| Z69890.1      | ENSG00000206168 | 0.53 |

---

1 common element in "WT (Barcelona)", "TP53 Altered" and "Trisomy 12":

|         |                 |   |
|---------|-----------------|---|
| GAPLINC | ENSG00000266835 | 0 |
|---------|-----------------|---|

---

2 common elements in "WT (Barcelona)", "WT (Aviano)" and "Trisomy 12":

|          |                 |      |
|----------|-----------------|------|
| SNORA14  | ENSG00000251922 | 0    |
| TAGLN2P1 | ENSG00000253676 | 0.54 |

**Supplementary Table 9a. Significantly enriched pathways among genes significantly decreased upon Rp11-161H23.5 silencing in MEC-1 compared to controls.**

| Category           | Term          | Description                                                       | LogP   | Log(q-value) |
|--------------------|---------------|-------------------------------------------------------------------|--------|--------------|
| Reactome Gene Sets | R-HSA-1280215 | Cytokine Signaling in Immune system                               | -11.48 | -7.16        |
| Reactome Gene Sets | R-HSA-372790  | Signaling by GPCR                                                 | -10.54 | -6.80        |
| Reactome Gene Sets | R-HSA-388396  | GPCR downstream signalling                                        | -10.15 | -6.50        |
| Reactome Gene Sets | R-HSA-909733  | Interferon alpha/beta signaling                                   | -7.39  | -4.12        |
| Reactome Gene Sets | R-HSA-76002   | Platelet activation, signaling and aggregation                    | -7.22  | -4.07        |
| Reactome Gene Sets | R-HSA-418594  | G alpha (i) signalling events                                     | -6.59  | -3.72        |
| Reactome Gene Sets | R-HSA-109582  | Hemostasis                                                        | -6.46  | -3.66        |
| WikiPathways       | WP3929        | Chemokine signaling pathway                                       | -6.29  | -3.53        |
| Reactome Gene Sets | R-HSA-373076  | Class A/1 (Rhodopsin-like receptors)                              | -6.23  | -3.49        |
| Reactome Gene Sets | R-HSA-913531  | Interferon Signaling                                              | -5.72  | -3.06        |
| Reactome Gene Sets | R-HSA-500792  | GPCR ligand binding                                               | -5.61  | -2.99        |
| Reactome Gene Sets | R-HSA-456926  | Thrombin signalling through proteinase activated receptors (PARs) | -4.98  | -2.50        |
| Reactome Gene Sets | R-HSA-392518  | Signal amplification                                              | -4.90  | -2.44        |
| Reactome Gene Sets | R-HSA-9009391 | Extra-nuclear estrogen signaling                                  | -4.49  | -2.12        |
| Reactome Gene Sets | R-HSA-163685  | Integration of energy metabolism                                  | -4.21  | -1.93        |
| Reactome Gene Sets | R-HSA-449147  | Signaling by Interleukins                                         | -4.04  | -1.82        |
| WikiPathways       | WP455         | GPCRs class A rhodopsin like                                      | -4.04  | -1.82        |
| Reactome Gene Sets | R-HSA-375276  | Peptide ligand-binding receptors                                  | -3.98  | -1.78        |
| Reactome Gene Sets | R-HSA-418597  | G alpha (z) signalling events                                     | -3.95  | -1.77        |
| Reactome Gene Sets | R-HSA-111885  | Opioid Signalling                                                 | -3.93  | -1.76        |
| WikiPathways       | WP4172        | PI3K Akt signaling pathway                                        | -3.88  | -1.72        |
| WikiPathways       | WP58          | Monoamine GPCRs                                                   | -3.77  | -1.63        |
| WikiPathways       | WP536         | Calcium regulation in cardiac cells                               | -3.75  | -1.62        |
| Reactome Gene Sets | R-HSA-422356  | Regulation of insulin secretion                                   | -3.59  | -1.51        |
| Reactome Gene Sets | R-HSA-8939211 | ESR-mediated signaling                                            | -3.58  | -1.50        |
| Reactome Gene Sets | R-HSA-112040  | G-protein mediated events                                         | -3.57  | -1.50        |

|                    |               |                                                                    |       |       |
|--------------------|---------------|--------------------------------------------------------------------|-------|-------|
| Reactome Gene Sets | R-HSA-9662851 | Anti-inflammatory response favouring Leishmania parasite infection | -3.56 | -1.49 |
| Reactome Gene Sets | R-HSA-9664433 | Leishmania parasite growth and survival                            | -3.56 | -1.49 |
| Reactome Gene Sets | R-HSA-9658195 | Leishmania infection                                               | -3.48 | -1.45 |
| Reactome Gene Sets | R-HSA-9824443 | Parasitic Infection Pathways                                       | -3.48 | -1.45 |
| Reactome Gene Sets | R-HSA-6814122 | Cooperation of PDCL (PhLP1) and TRiC/CCT in G-protein beta folding | -3.48 | -1.45 |
| Reactome Gene Sets | R-HSA-9006931 | Signaling by Nuclear Receptors                                     | -3.45 | -1.42 |
| Reactome Gene Sets | R-HSA-380108  | Chemokine receptors bind chemokines                                | -3.45 | -1.42 |
| Reactome Gene Sets | R-HSA-392170  | ADP signalling through P2Y purinoceptor 12                         | -3.42 | -1.40 |

---

**Supplementary Table 9b. Significantly enriched pathways among genes significantly decreased upon LINC00152 silencing in MEC-1 compared to controls.**

| Category           | Term          | Description                                                         | LogP  | Log(q-value) |
|--------------------|---------------|---------------------------------------------------------------------|-------|--------------|
| WikiPathways       | WP5095        | <b>Overview of proinflammatory and profibrotic mediators</b>        | -7.02 | -3.52        |
| Reactome Gene Sets | R-HSA-1474244 | <b>Extracellular matrix organization</b>                            | -6.93 | -3.49        |
| Reactome Gene Sets | R-HSA-1474290 | <b>Collagen formation</b>                                           | -6.39 | -3.12        |
| WikiPathways       | WP5115        | Network map of SARS CoV 2 signaling pathway                         | -6.02 | -2.83        |
| Reactome Gene Sets | R-HSA-8978868 | <b>Fatty acid metabolism</b>                                        | -5.94 | -2.77        |
| Reactome Gene Sets | R-HSA-556833  | <b>Metabolism of lipids</b>                                         | -5.80 | -2.69        |
| Reactome Gene Sets | R-HSA-211945  | Phase I - Functionalization of compounds                            | -5.62 | -2.58        |
| Reactome Gene Sets | R-HSA-380108  | <b>Chemokine receptors bind chemokines</b>                          | -5.43 | -2.51        |
| WikiPathways       | WP2118        | <b>Arrhythmogenic right ventricular cardiomyopathy</b>              | -5.42 | -2.51        |
| WikiPathways       | WP43          | <b>Oxidation by cytochrome P450</b>                                 | -5.13 | -2.29        |
| Reactome Gene Sets | R-HSA-211897  | <b>Cytochrome P450 - arranged by substrate type</b>                 | -5.02 | -2.27        |
| Reactome Gene Sets | R-HSA-1650814 | <b>Collagen biosynthesis and modifying enzymes</b>                  | -4.97 | -2.26        |
| WikiPathways       | WP4721        | <b>Eicosanoid metabolism via lipoxygenases LOX</b>                  | -4.67 | -2.01        |
| Reactome Gene Sets | R-HSA-2142753 | <b>Arachidonic acid metabolism</b>                                  | -4.51 | -1.91        |
| Reactome Gene Sets | R-HSA-8948216 | Collagen chain trimerization                                        | -4.47 | -1.91        |
| Reactome Gene Sets | R-HSA-2022090 | <b>Assembly of collagen fibrils and other multimeric structures</b> | -4.40 | -1.87        |
| Reactome Gene Sets | R-HSA-372790  | <b>Signaling by GPCR</b>                                            | -4.30 | -1.81        |
| WikiPathways       | WP4541        | Hippo Merlin signaling dysregulation                                | -4.29 | -1.81        |
| Reactome Gene Sets | R-HSA-216083  | <b>Integrin cell surface interactions</b>                           | -4.13 | -1.68        |
| Reactome Gene Sets | R-HSA-388396  | GPCR downstream signalling                                          | -4.05 | -1.62        |
| Reactome Gene Sets | R-HSA-5617833 | Cilium Assembly                                                     | -4.01 | -1.60        |
| WikiPathways       | WP5285        | Immune infiltration in pancreatic cancer                            | -3.82 | -1.48        |
| WikiPathways       | WP5087        | Pleural mesothelioma                                                | -3.75 | -1.44        |
| Reactome Gene Sets | R-HSA-211859  | Biological oxidations                                               | -3.56 | -1.32        |

**Supplementary Table 9c. Significantly enriched pathways among genes significantly decreased upon LINC00158 silencing in MEC-1 compared to controls.**

| Term          | Description                                                                      | LogP   | Log(q-value) |
|---------------|----------------------------------------------------------------------------------|--------|--------------|
| R-HSA-2262752 | Cellular responses to stress                                                     | -53.62 | -49.27       |
| R-HSA-1280218 | Adaptive Immune System                                                           | -47.45 | -43.71       |
| R-HSA-9824446 | Viral Infection Pathways                                                         | -45.16 | -41.51       |
| R-HSA-1280215 | <b>Cytokine Signaling in Immune system</b>                                       | -41.65 | -38.26       |
| R-HSA-983169  | Class I MHC mediated antigen processing & presentation                           | -41.13 | -37.79       |
| R-HSA-1640170 | <b>Cell Cycle</b>                                                                | -40.95 | -37.65       |
| R-HSA-8953854 | Metabolism of RNA                                                                | -40.12 | -36.86       |
| R-HSA-69278   | <b>Cell Cycle, Mitotic</b>                                                       | -37.23 | -34.00       |
| R-HSA-199991  | Membrane Trafficking                                                             | -34.49 | -31.35       |
| R-HSA-983168  | Antigen processing: Ubiquitination & Proteasome degradation                      | -34.03 | -30.91       |
| R-HSA-5653656 | Vesicle-mediated transport                                                       | -32.87 | -29.78       |
| R-HSA-68886   | M Phase                                                                          | -29.48 | -26.48       |
| R-HSA-5663202 | Diseases of signal transduction by growth factor receptors and second messengers | -26.59 | -23.63       |
| R-HSA-194315  | Signaling by Rho GTPases                                                         | -26.27 | -23.32       |
| R-HSA-9716542 | Signaling by Rho GTPases, Miro GTPases and RHOBTB3                               | -26.15 | -23.24       |
| R-HSA-157118  | Signaling by NOTCH                                                               | -25.77 | -22.87       |
| R-HSA-8878171 | Transcriptional regulation by RUNX1                                              | -25.63 | -22.75       |
| R-HSA-162906  | HIV Infection                                                                    | -25.58 | -22.72       |
| R-HSA-9711123 | Cellular response to chemical stress                                             | -24.85 | -22.01       |
| R-HSA-449147  | Signaling by Interleukins                                                        | -24.20 | -21.38       |
| R-HSA-3247509 | Chromatin modifying enzymes                                                      | -22.78 | -20.07       |
| R-HSA-4839726 | Chromatin organization                                                           | -22.78 | -20.07       |
| R-HSA-8939236 | RUNX1 regulates transcription of genes involved in differentiation of HSCs       | -21.81 | -19.15       |
| R-HSA-195721  | <b>Signaling by WNT</b>                                                          | -21.42 | -18.79       |
| R-HSA-69242   | <b>S Phase</b>                                                                   | -21.19 | -18.58       |
| R-HSA-1257604 | <b>PIP3 activates AKT signaling</b>                                              | -21.04 | -18.46       |

|               |                                                                     |        |        |
|---------------|---------------------------------------------------------------------|--------|--------|
| R-HSA-446203  | Asparagine N-linked glycosylation                                   | -21.05 | -18.46 |
| R-HSA-69002   | DNA Replication Pre-Initiation                                      | -21.02 | -18.45 |
| R-HSA-68867   | Assembly of the pre-replicative complex                             | -20.55 | -18.03 |
| R-HSA-69306   | <b>DNA Replication</b>                                              | -20.00 | -17.52 |
| R-HSA-162909  | Host Interactions of HIV factors                                    | -19.94 | -17.47 |
| R-HSA-9006925 | Intracellular signaling by second messengers                        | -19.86 | -17.39 |
| R-HSA-69620   | <b>Cell Cycle Checkpoints</b>                                       | -19.80 | -17.35 |
| R-HSA-983705  | <b>Signaling by the B Cell Receptor (BCR)</b>                       | -19.78 | -17.33 |
| R-HSA-69275   | <b>G2/M Transition</b>                                              | -19.28 | -16.86 |
| R-HSA-5607764 | CLEC7A (Dectin-1) signaling                                         | -19.26 | -16.84 |
| R-HSA-201681  | TCF dependent signaling in response to WNT                          | -19.18 | -16.77 |
| R-HSA-453274  | Mitotic G2-G2/M phases                                              | -19.03 | -16.63 |
| R-HSA-69656   | Cyclin A:Cdk2-associated events at S phase entry                    | -18.95 | -16.55 |
| R-HSA-948021  | Transport to the Golgi and subsequent modification                  | -18.70 | -16.31 |
| R-HSA-9013694 | Signaling by NOTCH4                                                 | -18.67 | -16.29 |
| R-HSA-9675108 | Nervous system development                                          | -18.63 | -16.26 |
| R-HSA-199977  | ER to Golgi Anterograde Transport                                   | -18.53 | -16.17 |
| R-HSA-69202   | Cyclin E associated events during G1/S transition                   | -18.44 | -16.08 |
| R-HSA-195258  | RHO GTPase Effectors                                                | -18.39 | -16.03 |
| R-HSA-6807070 | PTEN Regulation                                                     | -18.31 | -15.96 |
| R-HSA-9679506 | SARS-CoV Infections                                                 | -18.24 | -15.90 |
| R-HSA-202424  | Downstream TCR signaling                                            | -18.06 | -15.74 |
| R-HSA-422475  | Axon guidance                                                       | -17.91 | -15.60 |
| R-HSA-1236975 | Antigen processing-Cross presentation                               | -17.61 | -15.32 |
| R-HSA-5357801 | Programmed Cell Death                                               | -17.39 | -15.10 |
| R-HSA-5676590 | <b>NIK--&gt;noncanonical NF-kB signaling</b>                        | -17.37 | -15.08 |
| R-HSA-450531  | Regulation of mRNA stability by proteins that bind AU-rich elements | -17.36 | -15.08 |
| R-HSA-1169091 | <b>Activation of NF-kappaB in B cells</b>                           | -17.32 | -15.04 |
| R-HSA-176408  | Regulation of APC/C activators between G1/S and early anaphase      | -17.20 | -14.94 |

|               |                                                                                                          |        |        |
|---------------|----------------------------------------------------------------------------------------------------------|--------|--------|
| R-HSA-176814  | Activation of APC/C and APC/C:Cdc20 mediated degradation of mitotic proteins                             | -17.14 | -14.88 |
| R-HSA-5607761 | Dectin-1 mediated noncanonical NF-kB signaling                                                           | -17.09 | -14.84 |
| R-HSA-174178  | APC/C:Cdh1 mediated degradation of Cdc20 and other APC/C:Cdh1 targeted proteins in late mitosis/early G1 | -16.86 | -14.62 |
| R-HSA-202403  | TCR signaling                                                                                            | -16.70 | -14.47 |
| R-HSA-174143  | APC/C-mediated degradation of cell cycle proteins                                                        | -16.65 | -14.42 |
| R-HSA-453276  | <b>Regulation of mitotic cell cycle</b>                                                                  | -16.65 | -14.42 |
| R-HSA-69563   | <b>p53-Dependent G1 DNA Damage Response</b>                                                              | -16.56 | -14.33 |
| R-HSA-69580   | <b>p53-Dependent G1/S DNA damage checkpoint</b>                                                          | -16.56 | -14.33 |
| R-HSA-8878166 | Transcriptional regulation by RUNX2                                                                      | -16.54 | -14.32 |
| R-HSA-5668541 | <b>TNFR2 non-canonical NF-kB pathway</b>                                                                 | -16.44 | -14.23 |
| R-HSA-5688426 | Deubiquitination                                                                                         | -16.42 | -14.21 |
| R-HSA-176409  | <b>APC/C:Cdc20 mediated degradation of mitotic proteins</b>                                              | -16.41 | -14.20 |
| R-HSA-5621481 | C-type lectin receptors (CLRs)                                                                           | -16.35 | -14.16 |
| R-HSA-68882   | <b>Mitotic Anaphase</b>                                                                                  | -16.33 | -14.14 |
| R-HSA-174154  | <b>APC/C:Cdc20 mediated degradation of Securin</b>                                                       | -16.31 | -14.13 |
| R-HSA-351202  | Metabolism of polyamines                                                                                 | -16.31 | -14.12 |
| R-HSA-174084  | Autodegradation of Cdh1 by Cdh1:APC/C                                                                    | -16.30 | -14.12 |
| R-HSA-2555396 | <b>Mitotic Metaphase and Anaphase</b>                                                                    | -16.23 | -14.05 |
| R-HSA-174184  | Cdc20:Phospho-APC/C mediated degradation of Cyclin A                                                     | -16.12 | -13.96 |
| R-HSA-69017   | CDK-mediated phosphorylation and removal of Cdc6                                                         | -16.12 | -13.96 |
| R-HSA-5689880 | Ub-specific processing proteases                                                                         | -16.11 | -13.95 |
| R-HSA-69615   | <b>G1/S DNA Damage Checkpoints</b>                                                                       | -16.07 | -13.92 |
| R-HSA-1236974 | ER-Phagosome pathway                                                                                     | -16.06 | -13.92 |
| R-HSA-8852276 | The role of GTSE1 in G2/M progression after G2 checkpoint                                                | -15.97 | -13.83 |
| R-HSA-179419  | APC:Cdc20 mediated degradation of cell cycle proteins prior to satisfaction of the cell cycle checkpoint | -15.90 | -13.76 |
| R-HSA-8939902 | Regulation of RUNX2 expression and activity                                                              | -15.90 | -13.76 |
| R-HSA-8951664 | Neddylation                                                                                              | -15.86 | -13.73 |
| R-HSA-8948751 | Regulation of PTEN stability and activity                                                                | -15.84 | -13.71 |
| R-HSA-5358346 | <b>Hedgehog ligand biogenesis</b>                                                                        | -15.80 | -13.68 |

|               |                                                                     |        |        |
|---------------|---------------------------------------------------------------------|--------|--------|
| R-HSA-9755511 | KEAP1-NFE2L2 pathway                                                | -15.78 | -13.66 |
| R-HSA-1168372 | <b>Downstream signaling events of B Cell Receptor (BCR)</b>         | -15.65 | -13.54 |
| R-HSA-180585  | Vif-mediated degradation of APOBEC3G                                | -15.55 | -13.45 |
| R-HSA-453279  | Mitotic G1 phase and G1/S transition                                | -15.54 | -13.45 |
| R-HSA-72203   | Processing of Capped Intron-Containing Pre-mRNA                     | -15.22 | -13.13 |
| R-HSA-109581  | Apoptosis                                                           | -15.20 | -13.12 |
| R-HSA-9020702 | Interleukin-1 signaling                                             | -15.12 | -13.04 |
| R-HSA-69206   | G1/S Transition                                                     | -15.06 | -12.99 |
| R-HSA-75815   | Ubiquitin-dependent degradation of Cyclin D                         | -15.04 | -12.97 |
| R-HSA-187577  | SCF(Skp2)-mediated degradation of p27/p21                           | -15.02 | -12.96 |
| R-HSA-5610780 | Degradation of GLI1 by the proteasome                               | -15.02 | -12.96 |
| R-HSA-5610783 | Degradation of GLI2 by the proteasome                               | -15.02 | -12.96 |
| R-HSA-5610785 | GLI3 is processed to GLI3R by the proteasome                        | -15.02 | -12.96 |
| R-HSA-69052   | Switching of origins to a post-replicative state                    | -15.01 | -12.96 |
| R-HSA-2871837 | <b>FCERI mediated NF-kB activation</b>                              | -14.96 | -12.90 |
| R-HSA-69541   | Stabilization of p53                                                | -14.76 | -12.72 |
| R-HSA-2467813 | Separation of Sister Chromatids                                     | -14.75 | -12.71 |
| R-HSA-69481   | G2/M Checkpoints                                                    | -14.71 | -12.67 |
| R-HSA-2454202 | Fc epsilon receptor (FCERI) signaling                               | -14.65 | -12.63 |
| R-HSA-9694516 | SARS-CoV-2 Infection                                                | -14.61 | -12.60 |
| R-HSA-211733  | Regulation of activated PAK-2p34 by proteasome mediated degradation | -14.53 | -12.51 |
| R-HSA-69239   | Synthesis of DNA                                                    | -14.38 | -12.37 |
| R-HSA-446652  | <b>Interleukin-1 family signaling</b>                               | -14.34 | -12.34 |
| R-HSA-5387390 | Hh mutants abrogate ligand secretion                                | -14.27 | -12.28 |
| R-HSA-350562  | Regulation of ornithine decarboxylase (ODC)                         | -14.26 | -12.26 |
| R-HSA-4641257 | Degradation of AXIN                                                 | -14.25 | -12.26 |
| R-HSA-8941858 | Regulation of RUNX3 expression and activity                         | -14.25 | -12.26 |
| R-HSA-5658442 | Regulation of RAS by GAPs                                           | -14.16 | -12.18 |
| R-HSA-8878159 | Transcriptional regulation by RUNX3                                 | -14.15 | -12.17 |

|               |                                                                          |        |        |
|---------------|--------------------------------------------------------------------------|--------|--------|
| R-HSA-5358351 | Signaling by Hedgehog                                                    | -14.14 | -12.17 |
| R-HSA-450408  | AUF1 (hnRNP D0) binds and destabilizes mRNA                              | -14.00 | -12.03 |
| R-HSA-5362768 | Hh mutants are degraded by ERAD                                          | -14.00 | -12.03 |
| R-HSA-349425  | Autodegradation of the E3 ubiquitin ligase COP1                          | -13.99 | -12.02 |
| R-HSA-9762114 | GSK3B and BTRC:CUL1-mediated-degradation of NFE2L2                       | -13.99 | -12.02 |
| R-HSA-9012999 | RHO GTPase cycle                                                         | -13.96 | -11.99 |
| R-HSA-5678895 | Defective CFTR causes cystic fibrosis                                    | -13.80 | -11.85 |
| R-HSA-4641258 | Degradation of DVL                                                       | -13.76 | -11.80 |
| R-HSA-169911  | Regulation of Apoptosis                                                  | -13.74 | -11.78 |
| R-HSA-376176  | Signaling by ROBO receptors                                              | -13.69 | -11.74 |
| R-HSA-72163   | mRNA Splicing - Major Pathway                                            | -13.64 | -11.69 |
| R-HSA-9010553 | <b>Regulation of expression of SLITs and ROBOs</b>                       | -13.50 | -11.55 |
| R-HSA-9604323 | Negative regulation of NOTCH4 signaling                                  | -13.49 | -11.55 |
| R-HSA-8854050 | FBXL7 down-regulates AURKA during mitotic entry and in early mitosis     | -13.25 | -11.32 |
| R-HSA-5683057 | <b>MAPK family signaling cascades</b>                                    | -13.17 | -11.25 |
| R-HSA-5610787 | Hedgehog 'off' state                                                     | -13.13 | -11.21 |
| R-HSA-195253  | Degradation of beta-catenin by the destruction complex                   | -13.05 | -11.14 |
| R-HSA-5684996 | <b>MAPK1/MAPK3 signaling</b>                                             | -13.01 | -11.09 |
| R-HSA-180534  | Vpu mediated degradation of CD4                                          | -12.98 | -11.07 |
| R-HSA-69601   | Ubiquitin Mediated Degradation of Phosphorylated Cdc25A                  | -12.98 | -11.07 |
| R-HSA-69610   | p53-Independent DNA Damage Response                                      | -12.98 | -11.07 |
| R-HSA-69613   | p53-Independent G1/S DNA damage checkpoint                               | -12.98 | -11.07 |
| R-HSA-72172   | mRNA Splicing                                                            | -12.90 | -11.00 |
| R-HSA-1234176 | Oxygen-dependent proline hydroxylation of Hypoxia-inducible Factor Alpha | -12.74 | -10.86 |
| R-HSA-68949   | Orc1 removal from chromatin                                              | -12.66 | -10.78 |
| R-HSA-6807878 | COPI-mediated anterograde transport                                      | -12.59 | -10.72 |
| R-HSA-3858494 | <b>Beta-catenin independent WNT signaling</b>                            | -12.48 | -10.61 |
| R-HSA-5689603 | UCH proteinases                                                          | -12.44 | -10.58 |
| R-HSA-5673001 | <b>RAF/MAP kinase cascade</b>                                            | -12.43 | -10.57 |

|               |                                                                     |        |        |
|---------------|---------------------------------------------------------------------|--------|--------|
| R-HSA-9759194 | Nuclear events mediated by NFE2L2                                   | -12.41 | -10.56 |
| R-HSA-174113  | SCF-beta-TrCP mediated degradation of Emi1                          | -12.28 | -10.42 |
| R-HSA-5619084 | ABC transporter disorders                                           | -12.25 | -10.40 |
| R-HSA-9793380 | Formation of paraxial mesoderm                                      | -12.16 | -10.31 |
| R-HSA-1234174 | <b>Cellular response to hypoxia</b>                                 | -11.93 | -10.10 |
| R-HSA-5632684 | Hedgehog 'on' state                                                 | -11.91 | -10.08 |
| R-HSA-1236978 | Cross-presentation of soluble exogenous antigens (endosomes)        | -11.71 | -9.89  |
| R-HSA-71291   | Metabolism of amino acids and derivatives                           | -11.71 | -9.89  |
| R-HSA-4086400 | PCP/CE pathway                                                      | -11.62 | -9.81  |
| R-HSA-382556  | ABC-family proteins mediated transport                              | -11.56 | -9.76  |
| R-HSA-4608870 | Asymmetric localization of PCP proteins                             | -11.35 | -9.56  |
| R-HSA-9824272 | Somitogenesis                                                       | -11.34 | -9.55  |
| R-HSA-5687128 | <b>MAPK6/MAPK4 signaling</b>                                        | -11.30 | -9.51  |
| R-HSA-6811442 | Intra-Golgi and retrograde Golgi-to-ER traffic                      | -11.21 | -9.43  |
| R-HSA-3214847 | HATs acetylate histones                                             | -11.09 | -9.31  |
| R-HSA-3214858 | RMTs methylate histone arginines                                    | -10.63 | -8.88  |
| R-HSA-9705683 | SARS-CoV-2-host interactions                                        | -10.58 | -8.83  |
| R-HSA-5619115 | Disorders of transmembrane transporters                             | -10.11 | -8.39  |
| R-HSA-8856688 | Golgi-to-ER retrograde transport                                    | -10.04 | -8.33  |
| R-HSA-9705671 | SARS-CoV-2 activates/modulates innate and adaptive immune responses | -8.30  | -6.72  |
| R-HSA-9758941 | Gastrulation                                                        | -7.67  | -6.13  |
| R-HSA-6811434 | COPI-dependent Golgi-to-ER retrograde traffic                       | -5.58  | -4.24  |
| R-HSA-9833482 | PKR-mediated signaling                                              | -3.25  | -2.21  |
| R-HSA-5693571 | Nonhomologous End-Joining (NHEJ)                                    | -3.24  | -2.20  |
| R-HSA-73856   | RNA Polymerase II Transcription Termination                         | -3.24  | -2.20  |
| R-HSA-156902  | Peptide chain elongation                                            | -3.22  | -2.18  |
| R-HSA-192823  | Viral mRNA Translation                                              | -3.22  | -2.18  |
| R-HSA-6791312 | TP53 Regulates Transcription of Cell Cycle Genes                    | -3.22  | -2.18  |
| R-HSA-202040  | G-protein activation                                                | -3.20  | -2.16  |

|               |                                                                                      |       |       |
|---------------|--------------------------------------------------------------------------------------|-------|-------|
| R-HSA-982772  | Growth hormone receptor signaling                                                    | -3.20 | -2.16 |
| R-HSA-180897  | Vpr-mediated induction of apoptosis by mitochondrial outer membrane permeabilization | -3.19 | -2.16 |
| R-HSA-6806664 | Metabolism of vitamin K                                                              | -3.19 | -2.16 |
| R-HSA-9013409 | RHOJ GTPase cycle                                                                    | -3.18 | -2.15 |
| R-HSA-9821993 | Replacement of protamines by nucleosomes in the male pronucleus                      | -3.18 | -2.15 |
| R-HSA-877312  | Regulation of IFNG signaling                                                         | -3.17 | -2.15 |
| R-HSA-9005891 | Loss of function of MECP2 in Rett syndrome                                           | -3.17 | -2.15 |
| R-HSA-9005895 | Pervasive developmental disorders                                                    | -3.17 | -2.15 |
| R-HSA-9675151 | Disorders of Developmental Biology                                                   | -3.17 | -2.15 |
| R-HSA-9697154 | Disorders of Nervous System Development                                              | -3.17 | -2.15 |
| R-HSA-6811558 | PI5P, PP2A and IER3 Regulate PI3K/AKT Signaling                                      | -3.17 | -2.15 |
| R-HSA-8856825 | Cargo recognition for clathrin-mediated endocytosis                                  | -3.17 | -2.15 |
| R-HSA-425407  | SLC-mediated transmembrane transport                                                 | -3.16 | -2.14 |
| R-HSA-176407  | Conversion from APC/C:Cdc20 to APC/C:Cdh1 in late anaphase                           | -3.16 | -2.13 |
| R-HSA-392851  | Prostacyclin signalling through prostacyclin receptor                                | -3.16 | -2.13 |
| R-HSA-9703465 | Signaling by FLT3 fusion proteins                                                    | -3.16 | -2.13 |
| R-HSA-6802957 | <b>Oncogenic MAPK signaling</b>                                                      | -3.14 | -2.12 |
| R-HSA-72306   | tRNA processing                                                                      | -3.12 | -2.10 |
| R-HSA-9646399 | Aggrephagy                                                                           | -3.08 | -2.07 |
| R-HSA-9660821 | ADORA2B mediated anti-inflammatory cytokines production                              | -3.08 | -2.07 |
| R-HSA-381183  | ATF6 (ATF6-alpha) activates chaperone genes                                          | -3.08 | -2.07 |
| R-HSA-9701898 | <b>STAT3 nuclear events downstream of ALK signaling</b>                              | -3.08 | -2.07 |
| R-HSA-400685  | Sema4D in semaphorin signaling                                                       | -3.07 | -2.06 |
| R-HSA-418592  | ADP signalling through P2Y purinoceptor 1                                            | -3.07 | -2.06 |
| R-HSA-5357786 | TNFR1-induced proapoptotic signaling                                                 | -3.07 | -2.06 |
| R-HSA-8854691 | Interleukin-20 family signaling                                                      | -3.07 | -2.06 |
| R-HSA-9013508 | NOTCH3 Intracellular Domain Regulates Transcription                                  | -3.07 | -2.06 |
| R-HSA-5689901 | Metalloprotease DUBs                                                                 | -3.05 | -2.05 |
| R-HSA-6784531 | tRNA processing in the nucleus                                                       | -3.03 | -2.03 |

|               |                                                                                |       |       |
|---------------|--------------------------------------------------------------------------------|-------|-------|
| R-HSA-5625900 | RHO GTPases activate CIT                                                       | -3.00 | -2.00 |
| R-HSA-451927  | <b>Interleukin-2 family signaling</b>                                          | -2.99 | -2.00 |
| R-HSA-5633008 | TP53 Regulates Transcription of Cell Death Genes                               | -2.99 | -2.00 |
| R-HSA-6811438 | Intra-Golgi traffic                                                            | -2.99 | -2.00 |
| R-HSA-380320  | Recruitment of NuMA to mitotic centrosomes                                     | -2.99 | -1.99 |
| R-HSA-8875360 | InlB-mediated entry of Listeria monocytogenes into host cell                   | -2.99 | -1.99 |
| R-HSA-9694631 | Maturation of nucleoprotein                                                    | -2.99 | -1.99 |
| R-HSA-9694676 | Translation of Replicase and Assembly of the Replication Transcription Complex | -2.99 | -1.99 |
| R-HSA-448424  | Interleukin-17 signaling                                                       | -2.97 | -1.98 |
| R-HSA-3928665 | EPH-ephrin mediated repulsion of cells                                         | -2.96 | -1.97 |
| R-HSA-3232142 | SUMOylation of ubiquitinylation proteins                                       | -2.95 | -1.96 |
| R-HSA-9013407 | RHOH GTPase cycle                                                              | -2.95 | -1.96 |
| R-HSA-174411  | Polymerase switching on the C-strand of the telomere                           | -2.94 | -1.95 |
| R-HSA-912694  | Regulation of IFNA/IFNB signaling                                              | -2.94 | -1.95 |
| R-HSA-397795  | G-protein beta:gamma signalling                                                | -2.93 | -1.95 |
| R-HSA-416482  | G alpha (12/13) signalling events                                              | -2.93 | -1.94 |
| R-HSA-373760  | L1CAM interactions                                                             | -2.91 | -1.92 |
| R-HSA-70171   | Glycolysis                                                                     | -2.90 | -1.92 |
| R-HSA-75153   | Apoptotic execution phase                                                      | -2.88 | -1.90 |
| R-HSA-9013406 | RHOQ GTPase cycle                                                              | -2.88 | -1.90 |
| R-HSA-983712  | Ion channel transport                                                          | -2.88 | -1.90 |
| R-HSA-9840310 | Glycosphingolipid catabolism                                                   | -2.86 | -1.88 |
| R-HSA-416572  | Sema4D induced cell migration and growth-cone collapse                         | -2.86 | -1.88 |
| R-HSA-5621575 | CD209 (DC-SIGN) signaling                                                      | -2.86 | -1.88 |
| R-HSA-1236977 | Endosomal/Vacuolar pathway                                                     | -2.85 | -1.88 |
| R-HSA-193692  | Regulated proteolysis of p75NTR                                                | -2.85 | -1.88 |
| R-HSA-9020956 | Interleukin-27 signaling                                                       | -2.85 | -1.88 |
| R-HSA-190236  | Signaling by FGFR                                                              | -2.84 | -1.87 |
| R-HSA-9022692 | Regulation of MECP2 expression and activity                                    | -2.83 | -1.86 |

|               |                                                                                        |       |       |
|---------------|----------------------------------------------------------------------------------------|-------|-------|
| R-HSA-167160  | RNA Pol II CTD phosphorylation and interaction with CE during HIV infection            | -2.82 | -1.85 |
| R-HSA-191273  | Cholesterol biosynthesis                                                               | -2.82 | -1.85 |
| R-HSA-380994  | ATF4 activates genes in response to endoplasmic reticulum stress                       | -2.82 | -1.85 |
| R-HSA-77075   | RNA Pol II CTD phosphorylation and interaction with CE                                 | -2.82 | -1.85 |
| R-HSA-912526  | Interleukin receptor SHC signaling                                                     | -2.82 | -1.85 |
| R-HSA-1295596 | Spry regulation of FGF signaling                                                       | -2.81 | -1.85 |
| R-HSA-205043  | NRIF signals cell death from the nucleus                                               | -2.81 | -1.85 |
| R-HSA-399954  | Sema3A PAK dependent Axon repulsion                                                    | -2.81 | -1.85 |
| R-HSA-429958  | mRNA decay by 3' to 5' exoribonuclease                                                 | -2.81 | -1.85 |
| R-HSA-5684264 | <b>MAP3K8 (TPL2)-dependent MAPK1/3 activation</b>                                      | -2.81 | -1.85 |
| R-HSA-844456  | The NLRP3 inflammasome                                                                 | -2.81 | -1.85 |
| R-HSA-8949664 | Processing of SMDT1                                                                    | -2.81 | -1.85 |
| R-HSA-5603029 | IkBA variant leads to EDA-ID                                                           | -2.81 | -1.85 |
| R-HSA-5649702 | APEX1-Independent Resolution of AP Sites via the Single Nucleotide Replacement Pathway | -2.81 | -1.85 |
| R-HSA-9635465 | <b>Suppression of apoptosis</b>                                                        | -2.81 | -1.85 |
| R-HSA-9652817 | Signaling by MAPK mutants                                                              | -2.81 | -1.85 |
| R-HSA-168276  | NS1 Mediated Effects on Host Pathways                                                  | -2.77 | -1.81 |
| R-HSA-5674135 | <b>MAP2K and MAPK activation</b>                                                       | -2.77 | -1.81 |
| R-HSA-9013148 | CDC42 GTPase cycle                                                                     | -2.77 | -1.81 |
| R-HSA-6802946 | Signaling by moderate kinase activity BRAF mutants                                     | -2.74 | -1.78 |
| R-HSA-6802949 | Signaling by RAS mutants                                                               | -2.74 | -1.78 |
| R-HSA-6802955 | Paradoxical activation of RAF signaling by kinase inactive BRAF                        | -2.74 | -1.78 |
| R-HSA-9649948 | Signaling downstream of RAS mutants                                                    | -2.74 | -1.78 |
| R-HSA-389357  | CD28 dependent PI3K/Akt signaling                                                      | -2.73 | -1.77 |
| R-HSA-9609523 | Insertion of tail-anchored proteins into the endoplasmic reticulum membrane            | -2.73 | -1.77 |
| R-HSA-159231  | Transport of Mature mRNA Derived from an Intronless Transcript                         | -2.68 | -1.73 |
| R-HSA-9772755 | Formation of WDR5-containing histone-modifying complexes                               | -2.68 | -1.73 |
| R-HSA-418597  | G alpha (z) signalling events                                                          | -2.66 | -1.72 |
| R-HSA-109606  | Intrinsic Pathway for Apoptosis                                                        | -2.66 | -1.71 |

|               |                                                                                       |       |       |
|---------------|---------------------------------------------------------------------------------------|-------|-------|
| R-HSA-381033  | ATF6 (ATF6-alpha) activates chaperones                                                | -2.65 | -1.71 |
| R-HSA-5689877 | Josephin domain DUBs                                                                  | -2.65 | -1.71 |
| R-HSA-6803207 | TP53 Regulates Transcription of Caspase Activators and Caspases                       | -2.65 | -1.71 |
| R-HSA-114604  | GPVI-mediated activation cascade                                                      | -2.63 | -1.69 |
| R-HSA-9706574 | RHOBTB GTPase Cycle                                                                   | -2.63 | -1.69 |
| R-HSA-380259  | Loss of Nlp from mitotic centrosomes                                                  | -2.63 | -1.69 |
| R-HSA-380284  | Loss of proteins required for interphase microtubule organization from the centrosome | -2.63 | -1.69 |
| R-HSA-110381  | Resolution of AP sites via the single-nucleotide replacement pathway                  | -2.62 | -1.69 |
| R-HSA-75944   | Transcription from mitochondrial promoters                                            | -2.62 | -1.69 |
| R-HSA-9652169 | Signaling by MAP2K mutants                                                            | -2.62 | -1.69 |
| R-HSA-1226099 | Signaling by FGFR in disease                                                          | -2.61 | -1.68 |
| R-HSA-422356  | Regulation of insulin secretion                                                       | -2.60 | -1.67 |
| R-HSA-76005   | Response to elevated platelet cytosolic Ca <sup>2+</sup>                              | -2.60 | -1.67 |
| R-HSA-72086   | mRNA Capping                                                                          | -2.60 | -1.67 |
| R-HSA-8863795 | Downregulation of ERBB2 signaling                                                     | -2.60 | -1.67 |
| R-HSA-159234  | Transport of Mature mRNAs Derived from Intronless Transcripts                         | -2.60 | -1.67 |
| R-HSA-4551638 | SUMOylation of chromatin organization proteins                                        | -2.57 | -1.65 |
| R-HSA-196849  | Metabolism of water-soluble vitamins and cofactors                                    | -2.55 | -1.62 |
| R-HSA-6802948 | Signaling by high-kinase activity BRAF mutants                                        | -2.54 | -1.62 |
| R-HSA-1236973 | Cross-presentation of particulate exogenous antigens (phagosomes)                     | -2.54 | -1.62 |
| R-HSA-9017802 | Noncanonical activation of NOTCH3                                                     | -2.54 | -1.62 |
| R-HSA-9732724 | IFNG signaling activates MAPKs                                                        | -2.54 | -1.62 |
| R-HSA-5696395 | Formation of Incision Complex in GG-NER                                               | -2.52 | -1.60 |
| R-HSA-1660514 | Synthesis of PIPs at the Golgi membrane                                               | -2.51 | -1.60 |
| R-HSA-1839117 | Signaling by cytosolic FGFR1 fusion mutants                                           | -2.51 | -1.60 |
| R-HSA-8964315 | <b>G beta:gamma signalling through BTK</b>                                            | -2.51 | -1.60 |
| R-HSA-9758274 | <b>Regulation of NF-kappa B signaling</b>                                             | -2.51 | -1.60 |
| R-HSA-177929  | <b>Signaling by EGFR</b>                                                              | -2.51 | -1.60 |
| R-HSA-110314  | Recognition of DNA damage by PCNA-containing replication complex                      | -2.50 | -1.59 |

|               |                                                                                   |       |       |
|---------------|-----------------------------------------------------------------------------------|-------|-------|
| R-HSA-114452  | Activation of BH3-only proteins                                                   | -2.50 | -1.59 |
| R-HSA-3928663 | EPHA-mediated growth cone collapse                                                | -2.50 | -1.59 |
| R-HSA-203927  | MicroRNA (miRNA) biogenesis                                                       | -2.48 | -1.58 |
| R-HSA-429947  | Deadenylation of mRNA                                                             | -2.48 | -1.58 |
| R-HSA-6783589 | <b>Interleukin-6 family signaling</b>                                             | -2.48 | -1.58 |
| R-HSA-9820841 | M-decay: degradation of maternal mRNAs by maternally stored factors               | -2.48 | -1.58 |
| R-HSA-1268020 | Mitochondrial protein import                                                      | -2.48 | -1.58 |
| R-HSA-141424  | Amplification of signal from the kinetochores                                     | -2.48 | -1.57 |
| R-HSA-141444  | Amplification of signal from unattached kinetochores via a MAD2 inhibitory signal | -2.48 | -1.57 |
| R-HSA-1358803 | Downregulation of ERBB2:ERBB3 signaling                                           | -2.47 | -1.57 |
| R-HSA-174430  | Telomere C-strand synthesis initiation                                            | -2.47 | -1.57 |
| R-HSA-879415  | Advanced glycosylation endproduct receptor signaling                              | -2.47 | -1.57 |
| R-HSA-9637687 | Suppression of phagosomal maturation                                              | -2.47 | -1.57 |
| R-HSA-114608  | Platelet degranulation                                                            | -2.47 | -1.56 |
| R-HSA-8854518 | AURKA Activation by TPX2                                                          | -2.46 | -1.56 |
| R-HSA-180786  | Extension of Telomeres                                                            | -2.44 | -1.54 |
| R-HSA-9754678 | SARS-CoV-2 modulates host translation machinery                                   | -2.44 | -1.54 |
| R-HSA-8980692 | RHOA GTPase cycle                                                                 | -2.42 | -1.52 |
| R-HSA-168271  | Transport of Ribonucleoproteins into the Host Nucleus                             | -2.41 | -1.51 |
| R-HSA-168333  | NEP/NS2 Interacts with the Cellular Export Machinery                              | -2.41 | -1.51 |
| R-HSA-170822  | Regulation of Glucokinase by Glucokinase Regulatory Protein                       | -2.41 | -1.51 |
| R-HSA-182971  | EGFR downregulation                                                               | -2.41 | -1.51 |
| R-HSA-5619107 | Defective TPR may confer susceptibility towards thyroid papillary carcinoma (TPC) | -2.41 | -1.51 |
| R-HSA-5620912 | Anchoring of the basal body to the plasma membrane                                | -2.38 | -1.49 |
| R-HSA-110320  | Translesion Synthesis by POLH                                                     | -2.38 | -1.49 |
| R-HSA-8851708 | Signaling by FGFR2 IIIa TM                                                        | -2.38 | -1.49 |
| R-HSA-1643713 | Signaling by EGFR in Cancer                                                       | -2.38 | -1.48 |
| R-HSA-210991  | Basigin interactions                                                              | -2.38 | -1.48 |
| R-HSA-5696397 | Gap-filling DNA repair synthesis and ligation in GG-NER                           | -2.38 | -1.48 |

|               |                                                                                |       |       |
|---------------|--------------------------------------------------------------------------------|-------|-------|
| R-HSA-9006335 | Signaling by Erythropoietin                                                    | -2.38 | -1.48 |
| R-HSA-390471  | Association of Tric/CCT with target proteins during biosynthesis               | -2.37 | -1.48 |
| R-HSA-9607240 | FLT3 Signaling                                                                 | -2.37 | -1.48 |
| R-HSA-9772572 | Early SARS-CoV-2 Infection Events                                              | -2.37 | -1.48 |
| R-HSA-9634597 | GPER1 signaling                                                                | -2.36 | -1.48 |
| R-HSA-6802952 | Signaling by BRAF and RAF1 fusions                                             | -2.36 | -1.48 |
| R-HSA-110357  | Displacement of DNA glycosylase by APEX1                                       | -2.31 | -1.43 |
| R-HSA-1253288 | Downregulation of ERBB4 signaling                                              | -2.31 | -1.43 |
| R-HSA-8849469 | PTK6 Regulates RTKs and Their Effectors AKT1 and DOK1                          | -2.31 | -1.43 |
| R-HSA-8948747 | Regulation of PTEN localization                                                | -2.31 | -1.43 |
| R-HSA-8985947 | <b>Interleukin-9 signaling</b>                                                 | -2.31 | -1.43 |
| R-HSA-9029558 | NR1H2 & NR1H3 regulate gene expression linked to lipogenesis                   | -2.31 | -1.43 |
| R-HSA-156581  | Methylation                                                                    | -2.31 | -1.43 |
| R-HSA-174490  | Membrane binding and targetting of GAG proteins                                | -2.31 | -1.43 |
| R-HSA-174495  | Synthesis And Processing Of GAG, GAGPOL Polyproteins                           | -2.31 | -1.43 |
| R-HSA-189451  | Heme biosynthesis                                                              | -2.31 | -1.43 |
| R-HSA-8941856 | RUNX3 regulates NOTCH signaling                                                | -2.31 | -1.43 |
| R-HSA-8983432 | <b>Interleukin-15 signaling</b>                                                | -2.31 | -1.43 |
| R-HSA-9679504 | Translation of Replicase and Assembly of the Replication Transcription Complex | -2.31 | -1.43 |
| R-HSA-975110  | <b>TRAF6 mediated IRF7 activation in TLR7/8 or 9 signaling</b>                 | -2.31 | -1.43 |
| R-HSA-196854  | Metabolism of vitamins and cofactors                                           | -2.31 | -1.43 |
| R-HSA-8854214 | TBC/RABGAPs                                                                    | -2.29 | -1.42 |
| R-HSA-6804756 | Regulation of TP53 Activity through Phosphorylation                            | -2.29 | -1.41 |
| R-HSA-2173788 | Downregulation of TGF-beta receptor signaling                                  | -2.27 | -1.40 |
| R-HSA-198725  | Nuclear Events (kinase and transcription factor activation)                    | -2.27 | -1.40 |
| R-HSA-6790901 | rRNA modification in the nucleus and cytosol                                   | -2.27 | -1.40 |
| R-HSA-168927  | TICAM1, RIP1-mediated IKK complex recruitment                                  | -2.26 | -1.39 |
| R-HSA-418217  | G beta:gamma signalling through PLC beta                                       | -2.26 | -1.39 |
| R-HSA-8876384 | Listeria monocytogenes entry into host cells                                   | -2.26 | -1.39 |

|               |                                                                                                                       |       |       |
|---------------|-----------------------------------------------------------------------------------------------------------------------|-------|-------|
| R-HSA-8964616 | G beta:gamma signalling through CDC42                                                                                 | -2.26 | -1.39 |
| R-HSA-9013695 | NOTCH4 Intracellular Domain Regulates Transcription                                                                   | -2.26 | -1.39 |
| R-HSA-9669938 | Signaling by KIT in disease                                                                                           | -2.26 | -1.39 |
| R-HSA-9670439 | Signaling by phosphorylated juxtamembrane, extracellular and kinase domain KIT mutants                                | -2.26 | -1.39 |
| R-HSA-180689  | APOBEC3G mediated resistance to HIV-1 infection                                                                       | -2.25 | -1.39 |
| R-HSA-69478   | G2/M DNA replication checkpoint                                                                                       | -2.25 | -1.39 |
| R-HSA-9032759 | NTRK2 activates RAC1                                                                                                  | -2.25 | -1.39 |
| R-HSA-163359  | Glucagon signaling in metabolic regulation                                                                            | -2.23 | -1.37 |
| R-HSA-168274  | Export of Viral Ribonucleoproteins from Nucleus                                                                       | -2.23 | -1.37 |
| R-HSA-180746  | Nuclear import of Rev protein                                                                                         | -2.23 | -1.37 |
| R-HSA-352230  | Amino acid transport across the plasma membrane                                                                       | -2.23 | -1.37 |
| R-HSA-420092  | Glucagon-type ligand receptors                                                                                        | -2.23 | -1.37 |
| R-HSA-6783783 | <b>Interleukin-10 signaling</b>                                                                                       | -2.22 | -1.37 |
| R-HSA-73762   | RNA Polymerase I Transcription Initiation                                                                             | -2.22 | -1.37 |
| R-HSA-9024446 | NR1H2 and NR1H3-mediated signaling                                                                                    | -2.22 | -1.37 |
| R-HSA-9707616 | Heme signaling                                                                                                        | -2.22 | -1.37 |
| R-HSA-1483166 | Synthesis of PA                                                                                                       | -2.22 | -1.36 |
| R-HSA-2219530 | Constitutive Signaling by Aberrant PI3K in Cancer                                                                     | -2.19 | -1.34 |
| R-HSA-446193  | Biosynthesis of the N-glycan precursor (dolichol lipid-linked oligosaccharide, LLO) and transfer to a nascent protein | -2.19 | -1.34 |
| R-HSA-71406   | Pyruvate metabolism and Citric Acid (TCA) cycle                                                                       | -2.18 | -1.33 |
| R-HSA-1368108 | BMAL1:CLOCK,NPAS2 activates circadian gene expression                                                                 | -2.17 | -1.32 |
| R-HSA-189445  | Metabolism of porphyrins                                                                                              | -2.17 | -1.32 |
| R-HSA-2691230 | Signaling by NOTCH1 HD Domain Mutants in Cancer                                                                       | -2.16 | -1.32 |
| R-HSA-2691232 | Constitutive Signaling by NOTCH1 HD Domain Mutants                                                                    | -2.16 | -1.32 |
| R-HSA-71336   | Pentose phosphate pathway                                                                                             | -2.16 | -1.32 |
| R-HSA-937039  | IRAK1 recruits IKK complex                                                                                            | -2.16 | -1.32 |
| R-HSA-9648895 | Response of EIF2AK1 (HRI) to heme deficiency                                                                          | -2.16 | -1.32 |
| R-HSA-9706369 | Negative regulation of FLT3                                                                                           | -2.16 | -1.32 |
| R-HSA-975144  | IRAK1 recruits IKK complex upon TLR7/8 or 9 stimulation                                                               | -2.16 | -1.32 |
